# Supplementary material for: A polarity pathway for exocyst-dependent intracellular tube extension
Source: eLife journal article supplement (doi:10.7554/elife.65169), 2021-03-09
Supplement: supp [file elife-65169-supp-v1.zip]

Archive with 14 entries (14 files):
- elife_poa_e65169_Figure_1_figure_supplement_1.pdf
- elife_poa_e65169_Figure_2_figure_supplement_1.pdf
- elife_poa_e65169_Figure_4_figure_supplement_1.pdf
- elife_poa_e65169_Figure_4_figure_supplement_2.pdf
- elife_poa_e65169_Figure_5_figure_supplement_1.pdf
- elife_poa_e65169_Figure_2_source_data_1.xlsx
- elife_poa_e65169_Figure_3_source_data_1.xlsx
- elife_poa_e65169_Figure_5_source_data_1.xlsx
- elife_poa_e65169_Figure_5_source_data_2.xlsx
- elife_poa_e65169_Figure_6_source_data_1.xlsx
- elife_poa_e65169_Figure_6_source_data_2.xlsx
- elife_poa_e65169_Figure_7_source_data_1.xlsx
- elife_poa_e65169_Figure_7_source_data_2.xlsx
- elife_poa_e65169_Transparent_Reporting_File.pdf
