# Supplementary material for: A polarity pathway for exocyst-dependent intracellular tube extension
Source: eLife journal article supplement (doi:10.7554/elife.65169), 2021-03-09
Supplement: supp [file elife-65169-supp-v1.zip › elife_poa_e65169_Figure_2_source_data_1.xlsx]

## Sheet: Figure 2 - source data 1
	Figure 2 - source data 1. Positions of posterior excretory canal arms in control, SEC-5exc(-), RAL-1exc(-), PKC-3exc(-), PAR-6exc(-), CDC-42exc(-), and PAR-3exc(-)
	L1 stage larvae		excretory canal outgrowth (% of total body length)
	naming in figure 2	genotype	0-25%	26-50%	51-75%	76-100%	n
	control	xnIs547[t28h11.8p::zif-1]; par-3(it301[par-3::mCherry]); xnEx466[t28h11.8p::yfp::sl2::ifb-1::cfp, pRF4]	0	1	66	0	67
	SEC-5exc(-)	sec-5(xn51[sec-5::zf1::yfp loxP unc-119(+) loxP]); xnIs547; par-3(it301); xnEx466	24	13	1	0	38
	RAL-1exc(-)	ral-1(tm5205); xnIs472[ral-1p::zf1::yfp::ral-1]; xnIs547; xnEx472[t28h11.8p::yfp::sl2::ifb-1::cfp, pRF4]	15	21	0	0	36
	PKC-3exc(-)	pkc-3(xn84[zf1::gfp::pkc-3]); xnIs547; xnEx466	13	70	7	0	90
	PAR-6exc(-)	par-6(xn60[par-6::zf1::yfp loxP unc-119(+) loxP]); xnIs547; xnSi31[sec-8p::sec-8::mCherry unc-119(+)]; xnEx473[t28h11.8p::yfp::sl2::ifb-1::cfp, pRF4]	11	15	29	0	55
	CDC-42exc(-)	cdc-42(xn65[zf1::yfp::cdc-42 loxP unc-119(+) loxP]); xnIs547; par-3(it301); xnEx477[t28h11.8p::yfp::sl2::ifb-1::cfp, pRF4]	5	3	25	0	33
	PAR-3exc(-)	par-3(xn59[par-3::zf1::yfp loxP unc-119(+) loxP]); xnIs547; xnSi31; xnEx475[t28h11.8p::yfp::sl2::ifb-1::cfp, pRF4]	0	14	11	0	25
	L4 stage larvae		excretory canal outgrowth (% of total body length)
	naming in figure 2	genotype	0-25%	26-50%	51-75%	76-100%	n
	control	xnIs547[t28h11.8p::zif-1]; par-3(it301[par-3::mCherry]); xnEx466[t28h11.8p::yfp::sl2::ifb-1::cfp, pRF4]	0	0	2	106	108
	SEC-5exc(-)	sec-5(xn51[sec-5::zf1::yfp loxP unc-119(+) loxP]); xnIs547; par-3(it301); xnEx466	54	26	0	0	80
	RAL-1exc(-)	ral-1(tm5205); xnIs472[ral-1p::zf1::yfp::ral-1]; xnIs547; xnEx472[t28h11.8p::yfp::sl2::ifb-1::cfp, pRF4]	8	36	2	10	56
	PKC-3exc(-)	pkc-3(xn84[zf1::gfp::pkc-3]); xnIs547; xnEx466	5	12	81	15	113
	PAR-6exc(-)	par-6(xn60[par-6::zf1::yfp loxP unc-119(+) loxP]); xnIs547; xnSi31[sec-8p::sec-8::mCherry unc-119(+)]; xnEx473[t28h11.8p::yfp::sl2::ifb-1::cfp, pRF4]	23	17	18	59	117
	CDC-42exc(-)	cdc-42(xn65[zf1::yfp::cdc-42 loxP unc-119(+) loxP]); xnIs547; par-3(it301); xnEx477[t28h11.8p::yfp::sl2::ifb-1::cfp, pRF4]	9	23	33	79	144
	PAR-3exc(-)	par-3(xn59[par-3::zf1::yfp loxP unc-119(+) loxP]); xnIs547; xnSi31; xnEx475[t28h11.8p::yfp::sl2::ifb-1::cfp, pRF4]	0	0	2	60	62
