# Supplementary material for: A polarity pathway for exocyst-dependent intracellular tube extension
Source: eLife journal article supplement (doi:10.7554/elife.65169), 2021-03-09
Supplement: supp [file elife-65169-supp-v1.zip › elife_poa_e65169_Figure_3_source_data_1.xlsx]

## Sheet: Figure 3F - source data
		Figure 3F - source data. Fluorescent intensity values for line trace measurements of PAR-6::ZF1::YFP; PAR-3::mCherry and ZF1::YFP::CDC-42; PAR-6::mKate.
		par-6(xn60); par-3(it301); xnEx496[t28h11.8p::CFP, pRF4] replicate2 070120
		image004
		yellow channel (par-6-zf1-yfp)	measurements					multiply to fit to y-axis		red channel (par-3-mCh)	measurements				multiply to fit to y-axis
		distance (microns)	m1	m2	m3	avg	normalized to mCh	*40		distance (microns)	m1	m2	m3	avg	*40
		0	0.19575	0.33504	0.10641	0.2124	0.1062	4.248		0	0.15761	0.1211	0.09169	0.123467	4.93867
		0.06602	0.36098	0.41107	0.28929	0.35378	0.17689	7.0756		0.06602	0.29046	0.21883	0.02587	0.178387	7.13547
		0.13204	0.67269	0.59011	0.40721	0.55667	0.278335	11.1334		0.13204	0.19111	0.11279	0.05154	0.11848	4.7392
		0.19806	0.82558	0.59273	0.49272	0.63701	0.318505	12.7402		0.19806	0.37745	0.19241	0.01816	0.196007	7.84027
		0.26408	0.7718	0.69439	0.54594	0.67071	0.335355	13.4142		0.26408	0.33837	0.2846	0.05962	0.22753	9.1012
		0.3301	1.05664	1.05614	0.70126	0.938013	0.469007	18.7603		0.3301	0.29734	0.30159	0.1159	0.238277	9.53107
		0.39611	1.23535	1.09869	0.71714	1.01706	0.50853	20.3412		0.39611	0.33218	0.27481	0.00903	0.20534	8.2136
		0.46213	1.38235	1.24041	0.95524	1.19267	0.596333	23.8533		0.46213	0.25723	0.2759	0	0.17771	7.1084
		0.52815	1.65472	1.55666	1.23768	1.48302	0.74151	29.6604		0.52815	0.39403	0.23174	0	0.20859	8.3436
		0.59417	1.94862	1.80149	1.5132	1.75444	0.877218	35.0887		0.59417	0.29028	0.34792	0.02563	0.221277	8.85107
		0.66019	2.20979	2.14889	1.66087	2.00652	1.00326	40.1303		0.66019	0.28984	0.34916	0.0426	0.2272	9.088
		0.72621	2.78876	2.61905	2.26335	2.55705	1.27853	51.1411		0.72621	0.42975	0.55141	0.14317	0.374777	14.9911
		0.79223	3.28627	3.2256	3.0749	3.19559	1.59779	63.9118		0.79223	0.68633	0.80583	0.38031	0.624157	24.9663
		0.85825	3.86711	3.84313	4.00959	3.90661	1.95331	78.1322		0.85825	1.09486	1.53621	0.84713	1.1594	46.376
		0.92427	4.19744	4.32742	4.94018	4.48835	2.24417	89.7669		0.92427	1.58554	2.05677	1.28857	1.64363	65.7451
		0.99029	4.44808	4.66706	5.44121	4.85212	2.42606	97.0423		0.99029	1.91215	2.50989	1.7107	2.04425	81.7699
		1.05631	4.27951	4.4571	5.2815	4.6727	2.33635	93.4541		1.05631	2.13899	2.71352	2.25942	2.37064	94.8257
		1.12232	4.00648	3.57307	4.06143	3.88033	1.94016	77.6065		1.12232	1.85182	2.36327	2.07193	2.09567	83.8269
		1.18834	3.53099	3.12169	3.66709	3.43992	1.71996	68.7985		1.18834	1.60929	1.98897	1.78284	1.7937	71.748
		1.25436	2.86758	2.65299	3.09267	2.87108	1.43554	57.4216		1.25436	1.45764	1.74169	1.58061	1.59331	63.7325
		1.32038	2.86122	2.39187	2.76585	2.67298	1.33649	53.4596		1.32038	1.46586	1.73053	1.42934	1.54191	61.6764
		1.3864	2.60906	2.29372	2.5689	2.49056	1.24528	49.8112		1.3864	1.49144	1.58826	1.3435	1.4744	58.976
		1.45242	2.35902	2.53895	2.86139	2.58645	1.29323	51.7291		1.45242	1.18	1.82256	1.41133	1.4713	58.8519
		1.51844	2.81963	2.78533	3.08279	2.89592	1.44796	57.9183		1.51844	1.41007	1.73596	1.60735	1.58446	63.3784
		1.58446	3.559	3.00792	3.50243	3.35645	1.67823	67.129		1.58446	1.38437	1.86102	1.56237	1.60259	64.1035
		1.65048	4.57538	3.36688	4.34851	4.09692	2.04846	81.9385		1.65048	1.53034	2.44263	2.02663	1.99987	79.9947
		1.7165	5.18585	4.17626	4.987	4.78304	2.39152	95.6607		1.7165	2.16456	2.81907	2.06524	2.34962	93.9849
		1.78252	5.72388	4.88918	5.31948	5.31085	2.65542	106.217		1.78252	2.47207	2.86356	2.14269	2.49277	99.7109
		1.84853	5.67691	5.51394	5.48474	5.55853	2.77927	111.171		1.84853	2.619	3.12341	2.13626	2.62622	105.049
		1.91455	5.37102	5.57099	4.61754	5.18652	2.59326	103.73		1.91455	2.40479	3.16997	1.73734	2.43737	97.4947
		1.98057	4.31772	5.27956	3.81617	4.47115	2.23557	89.423		1.98057	1.87407	2.78039	1.12065	1.92504	77.0015
		2.04659	3.03455	4.98116	3.00962	3.67511	1.83756	73.5022		2.04659	1.30357	2.3294	0.66484	1.4326	57.3041
		2.11261	2.36069	4.08262	2.6144	3.01924	1.50962	60.3847		2.11261	0.69134	1.92084	0.30037	0.97085	38.834
		2.17863	2.32675	3.40192	2.03169	2.58679	1.29339	51.7357		2.17863	0.48951	1.50116	0.19658	0.729083	29.1633
		2.24465	1.80529	2.97247	1.73306	2.17027	1.08514	43.4055		2.24465	0.18266	1.05514	0.14991	0.46257	18.5028
		2.31067	1.4349	2.4459	1.5478	1.80953	0.904767	36.1907		2.31067	0.251	0.85422	0.1285	0.41124	16.4496
		2.37669	1.17975	2.19944	0.98262	1.45394	0.726968	29.0787		2.37669	0.27869	0.54817	0.15513	0.32733	13.0932
		2.44271	0.99018	1.77711	0.83729	1.20153	0.600763	24.0305		2.44271	0.23744	0.47649	0.15089	0.288273	11.5309
		2.50873	0.78078	1.46954	0.86416	1.03816	0.51908	20.7632		2.50873	0.16514	0.25432	0.16928	0.196247	7.84987
		2.57474	0.77478	1.28903	0.6407	0.901503	0.450752	18.0301		2.57474	0.06774	0.2062	0.22213	0.165357	6.61427
		2.64076	0.60083	1.14851	0.30732	0.685553	0.342777	13.7111		2.64076	0.21182	0.29106	0.2549	0.252593	10.1037
		2.70678	0.58492	0.77766	0.34133	0.56797	0.283985	11.3594		2.70678	0.22756	0.22425	0.17732	0.20971	8.3884
		2.7728	0.33699	0.49919	0.34812	0.394767	0.197383	7.89533		2.7728	0.31312	0.15986	0.21637	0.229783	9.19133
		image006
		yellow channel (par-6-zf1-yfp)	measurements					multiply to fit to y-axis		red channel (par-3-mCh)	measurements				multiply to fit to y-axis
		distance (microns)	m1	m2	m3	avg	normalized to mCh	*40		distance (microns)	m1	m2	m3	avg	*40
		0	0.03116	0.16775	0.00118	0.0666967	0.0333483	1.33393		0	0.04603	0.05552	0.19298	0.0981767	3.92707
		0.06602	0.04182	0.06318	0.11966	0.0748867	0.0374433	1.49773		0.06602	0.0012	0.12642	0.14876	0.0921267	3.68507
		0.13204	0.08454	0.20781	0.18825	0.1602	0.0801	3.204		0.13204	0.03365	0.21735	0.07775	0.109583	4.38333
		0.19806	0.10346	0.26875	0.13733	0.169847	0.0849233	3.39693		0.19806	0.07677	0.09005	0.05009	0.0723033	2.89213
		0.26408	0.26512	0.37441	0.31898	0.319503	0.159752	6.39007		0.26408	0.00967	0.03823	0.09962	0.0491733	1.96693
		0.3301	0.48431	0.62129	0.35135	0.48565	0.242825	9.713		0.3301	0	0.03166	0.12848	0.05338	2.1352
		0.39611	0.53889	0.90355	0.30838	0.583607	0.291803	11.6721		0.39611	0	0.03801	0.04122	0.02641	1.0564
		0.46213	0.84867	1.00668	0.66241	0.839253	0.419627	16.7851		0.46213	0.01362	0.03938	0.03159	0.0281967	1.12787
		0.52815	0.91477	1.23708	0.82824	0.993363	0.496682	19.8673		0.52815	0.02478	0.0119	0.00296	0.0132133	0.528533
		0.59417	1.23115	1.74845	1.03449	1.33803	0.669015	26.7606		0.59417	0.10687	0.03124	0	0.0460367	1.84147
		0.66019	1.60576	2.24485	1.37425	1.74162	0.87081	34.8324		0.66019	0.1248	0.08894	0.04747	0.08707	3.4828
		0.72621	2.06807	2.66038	1.95282	2.22709	1.11355	44.5418		0.72621	0.29512	0.41021	0.22812	0.31115	12.446
		0.79223	2.52689	2.56343	2.81571	2.63534	1.31767	52.7069		0.79223	0.82412	0.78143	0.76483	0.790127	31.6051
		0.85825	2.75379	2.81123	3.26924	2.94475	1.47238	58.8951		0.85825	1.06846	1.12272	1.06084	1.08401	43.3603
		0.92427	2.551	2.89992	2.82569	2.75887	1.37943	55.1774		0.92427	0.96094	1.44737	1.32624	1.24485	49.794
		0.99029	2.07944	2.3042	2.33184	2.23849	1.11925	44.7699		0.99029	0.79872	1.40532	1.43906	1.21437	48.5747
		1.05631	1.6128	1.90482	1.96644	1.82802	0.91401	36.5604		1.05631	0.67416	0.93596	0.98663	0.865583	34.6233
		1.12232	1.38931	1.60197	1.4833	1.49153	0.745763	29.8305		1.12232	0.64985	0.73824	0.58295	0.657013	26.2805
		1.18834	1.29934	1.18307	1.16142	1.21461	0.607305	24.2922		1.18834	0.65036	0.5151	0.40169	0.522383	20.8953
		1.25436	1.01603	1.09478	1.2542	1.12167	0.560835	22.4334		1.25436	0.47917	0.39874	0.43449	0.437467	17.4987
		1.32038	1.05767	0.88818	1.07628	1.00738	0.503688	20.1475		1.32038	0.51066	0.42577	0.59394	0.510123	20.4049
		1.3864	1.07756	0.96561	1.00105	1.01474	0.50737	20.2948		1.3864	0.47213	0.42975	0.38959	0.43049	17.2196
		1.45242	1.2782	0.91181	1.00801	1.06601	0.533003	21.3201		1.45242	0.36571	0.65536	0.47131	0.49746	19.8984
		1.51844	1.25932	1.04132	1.06159	1.12074	0.560372	22.4149		1.51844	0.53332	0.88475	0.60142	0.673163	26.9265
		1.58446	1.26645	1.55222	1.38653	1.40173	0.700867	28.0347		1.58446	0.65616	0.98467	0.84004	0.826957	33.0783
		1.65048	1.48021	1.84283	1.51161	1.61155	0.805775	32.231		1.65048	0.73768	0.98253	0.9698	0.89667	35.8668
		1.7165	2.35515	2.78005	1.77008	2.30176	1.15088	46.0352		1.7165	0.92112	1.13801	1.17566	1.07826	43.1305
		1.78252	2.73666	2.73457	2.49316	2.6548	1.3274	53.0959		1.78252	1.09188	1.39681	1.29959	1.26276	50.5104
		1.84853	2.77354	2.53036	3.00441	2.76944	1.38472	55.3887		1.84853	0.87295	1.468	1.60727	1.31607	52.6429
		1.91455	2.50138	2.19029	3.10332	2.59833	1.29917	51.9666		1.91455	0.5536	0.98067	1.80045	1.11157	44.4629
		1.98057	2.06151	1.71695	2.9802	2.25289	1.12644	45.0577		1.98057	0.31528	0.54299	1.56103	0.806433	32.2573
		2.04659	1.53044	1.36754	2.41755	1.77184	0.885922	35.4369		2.04659	0.15277	0.23242	1.05373	0.47964	19.1856
		2.11261	1.10417	1.08716	1.94222	1.37785	0.688925	27.557		2.11261	0.09484	0.21814	0.5851	0.29936	11.9744
		2.17863	0.80083	0.81692	1.44911	1.02229	0.511143	20.4457		2.17863	0.0755	0.06888	0.21201	0.118797	4.75187
		2.24465	0.62253	0.52034	0.93781	0.69356	0.34678	13.8712		2.24465	0.07566	0.07142	0.12565	0.09091	3.6364
		2.31067	0.34896	0.54918	0.65979	0.51931	0.259655	10.3862		2.31067	0.07902	0.06317	0.22407	0.122087	4.88347
		2.37669	0.22409	0.52523	0.39482	0.38138	0.19069	7.6276		2.37669	0.03719	0.05176	0.36011	0.149687	5.98747
		2.44271	0.13543	0.3635	0.33633	0.27842	0.13921	5.5684		2.44271	0.02986	0.16584	0.32172	0.172473	6.89893
		2.50873	0.07828	0.15205	0.32299	0.18444	0.09222	3.6888		2.50873	0	0.22964	0.33875	0.189463	7.57853
		2.57474	0.02721	0.05003	0.16585	0.08103	0.040515	1.6206		2.57474	0.00079	0.34088	0.18155	0.174407	6.97627
		2.64076	0.01577	0.08033	0.06558	0.0538933	0.0269467	1.07787		2.64076	0.02838	0.34341	0.17148	0.18109	7.2436
		2.70678	0.03213	0.03865	0.11911	0.0632967	0.0316483	1.26593		2.70678	0.02412	0.33037	0.17497	0.176487	7.05947
		2.7728	0.02233	0.08997	0.19188	0.101393	0.0506967	2.02787		2.7728	0.01089	0.50876	0.27341	0.264353	10.5741
		image008
		yellow channel (par-6-zf1-yfp)	measurements					multiply to fit to y-axis		red channel (par-3-mCh)	measurements				multiply to fit to y-axis
		distance (microns)	m1	m2	m3	avg	normalized to mCh	*40		distance (microns)	m1	m2	m3	avg	*40
		0	0.99365	0.22835	0.05363	0.42521	0.212605	8.5042		0	0.04123	0	0.05264	0.03129	1.2516
		0.06602	1.01734	0.57199	0.09906	0.562797	0.281398	11.2559		0.06602	0.03741	0.00027	0.00586	0.0145133	0.580533
		0.13204	0.87451	0.65303	0.22456	0.584033	0.292017	11.6807		0.13204	0.02115	0.0569	0.06435	0.0474667	1.89867
		0.19806	0.92505	0.63798	0.30243	0.62182	0.31091	12.4364		0.19806	0.04497	0.01691	0.02938	0.03042	1.2168
		0.26408	0.90332	0.80351	0.39726	0.701363	0.350682	14.0273		0.26408	0.12475	0.121	0	0.0819167	3.27667
		0.3301	1.1971	0.87034	0.62137	0.89627	0.448135	17.9254		0.3301	0.06768	0.07791	0.01014	0.05191	2.0764
		0.39611	1.38581	0.84807	0.72791	0.987263	0.493632	19.7453		0.39611	0.17265	0.06125	0.03762	0.0905067	3.62027
		0.46213	1.41015	0.94784	0.83776	1.06525	0.532625	21.305		0.46213	0.18927	0.09953	0.11125	0.13335	5.334
		0.52815	1.71741	1.14074	1.26401	1.37405	0.687027	27.4811		0.52815	0.30214	0.07597	0.29093	0.223013	8.92053
		0.59417	1.86284	1.28521	1.60384	1.58396	0.791982	31.6793		0.59417	0.62373	0.17172	0.56909	0.454847	18.1939
1.71		0.66019	1.79485	1.4932	1.82886	1.70564	0.852818	34.1127		0.66019	0.73134	0.5445	0.90088	0.725573	29.0229
		0.72621	1.87499	1.43393	1.6507	1.65321	0.826603	33.0641		0.72621	0.71676	0.98262	1.01666	0.905347	36.2139
		0.79223	2.15565	1.40858	0.87622	1.48015	0.740075	29.603		0.79223	0.70099	1.06121	0.95056	0.904253	36.1701
		0.85825	2.12584	1.17388	0.62481	1.30818	0.654088	26.1635		0.85825	0.9914	1.09685	0.6817	0.923317	36.9327
		0.92427	1.72439	0.96987	0.47666	1.05697	0.528487	21.1395		0.92427	0.90545	0.93272	0.5739	0.804023	32.1609
		0.99029	1.3431	0.66845	0.43497	0.815507	0.407753	16.3101		0.99029	0.63141	0.73894	0.21576	0.528703	21.1481
		1.05631	0.99906	0.32096	0.35369	0.557903	0.278952	11.1581		1.05631	0.49691	0.55657	0.27115	0.441543	17.6617
		1.12232	0.83768	0.16656	0.22833	0.410857	0.205428	8.21713		1.12232	0.40787	0.56556	0.24294	0.405457	16.2183
		1.18834	0.90438	0.28753	0.26957	0.48716	0.24358	9.7432		1.18834	0.42911	0.67802	0.25183	0.452987	18.1195
		1.25436	0.81378	0.33593	0.20793	0.452547	0.226273	9.05093		1.25436	0.31488	0.48264	0.28155	0.35969	14.3876
		1.32038	0.76365	0.31377	0.11987	0.399097	0.199548	7.98193		1.32038	0.3537	0.3333	0.25323	0.31341	12.5364
		1.3864	0.70323	0.26585	0.23214	0.400407	0.200203	8.00813		1.3864	0.40955	0.21989	0.33115	0.320197	12.8079
		1.45242	0.83676	0.23796	0.26467	0.446463	0.223232	8.92927		1.45242	0.23013	0.23852	0.39553	0.28806	11.5224
		1.51844	1.06266	0.14381	0.29782	0.50143	0.250715	10.0286		1.51844	0.31072	0.28543	0.4089	0.335017	13.4007
		1.58446	1.27965	0.3246	0.3872	0.663817	0.331908	13.2763		1.58446	0.57225	0.35586	0.63505	0.521053	20.8421
		1.65048	1.4885	0.35315	0.47351	0.77172	0.38586	15.4344		1.65048	0.82848	0.37905	0.51434	0.573957	22.9583
		1.7165	2.00584	0.36127	0.7046	1.0239	0.511952	20.4781		1.7165	0.98625	0.55965	0.6112	0.719033	28.7613
		1.78252	2.22624	0.687	0.80666	1.23997	0.619983	24.7993		1.78252	0.91591	0.77007	0.70395	0.796643	31.8657
		1.84853	2.02322	1.04803	0.96243	1.34456	0.67228	26.8912		1.84853	1.0751	1.14619	0.87399	1.03176	41.2704
		1.91455	1.59576	1.26143	1.28982	1.38234	0.691168	27.6467		1.91455	0.89586	1.12464	1.01144	1.01065	40.4259
		1.98057	1.48306	1.54864	1.71411	1.58194	0.790968	31.6387		1.98057	0.50672	1.15761	0.99445	0.88626	35.4504
		2.04659	1.13534	1.77071	1.44091	1.44899	0.724493	28.9797		2.04659	0.39371	1.05031	0.79031	0.744777	29.7911
		2.11261	1.09484	1.34212	1.33775	1.25824	0.629118	25.1647		2.11261	0.27463	0.95029	0.5669	0.597273	23.8909
		2.17863	1.14539	0.8691	1.19816	1.07088	0.535442	21.4177		2.17863	0.1934	0.70432	0.51125	0.469657	18.7863
		2.24465	1.15641	0.84008	0.90469	0.96706	0.48353	19.3412		2.24465	0.14996	0.58184	0.35756	0.36312	14.5248
		2.31067	1.12457	0.6185	0.83643	0.859833	0.429917	17.1967		2.31067	0.08691	0.44936	0.19442	0.243563	9.74253
		2.37669	0.93057	0.35288	0.9945	0.759317	0.379658	15.1863		2.37669	0.03665	0.24261	0.09568	0.12498	4.9992
		2.44271	0.72872	0.34242	1.17155	0.747563	0.373782	14.9513		2.44271	0.0254	0.12334	0.10935	0.08603	3.4412
		2.50873	0.63993	0.16319	1.12016	0.641093	0.320547	12.8219		2.50873	0.05536	0.10355	0.05351	0.0708067	2.83227
		2.57474	0.52723	0.04049	0.83656	0.468093	0.234047	9.36187		2.57474	0.03215	0.15721	0.01756	0.0689733	2.75893
		2.64076	0.31953	0.00303	0.38961	0.23739	0.118695	4.7478		2.64076	0.01727	0.07689	0.05613	0.0500967	2.00387
		2.70678	0.22897	0.00084	0.2358	0.155203	0.0776017	3.10407		2.70678	0.01606	0.13666	0.05058	0.0677667	2.71067
		2.7728	0.13207	0.03078	0.08929	0.0840467	0.0420233	1.68093		2.7728	0.0157	0.2428	0.04629	0.101597	4.06387
		image013
		yellow channel (par-6-zf1-yfp)	measurements					multiply to fit to y-axis		red channel (par-3-mCh)	measurements				multiply to fit to y-axis
		distance (microns)	m1	m2	m3	avg	normalized to mCh	*40		distance (microns)	m1	m2	m3	avg	*40
		0	0.1798	0.17944	0.14912	0.169453	0.0847267	3.38907		0	0.12852	0.06789	0.0383	0.0782367	3.12947
		0.06602	0.16489	0.25879	0.12491	0.182863	0.0914317	3.65727		0.06602	0.22675	0.09981	0.06033	0.128963	5.15853
		0.13204	0.32189	0.297	0.25575	0.291547	0.145773	5.83093		0.13204	0.2623	0.09959	0.06493	0.142273	5.69093
		0.19806	0.36638	0.45233	0.29573	0.37148	0.18574	7.4296		0.19806	0.09315	0.11872	0.07008	0.0939833	3.75933
		0.26408	0.44033	0.47981	0.29661	0.405583	0.202792	8.11167		0.26408	0.16939	0.12395	0.11562	0.13632	5.4528
		0.3301	0.37294	0.53521	0.31701	0.408387	0.204193	8.16773		0.3301	0.1467	0.1335	0.09314	0.124447	4.97787
		0.39611	0.31402	0.43724	0.36586	0.372373	0.186187	7.44747		0.39611	0.16093	0.07063	0.19382	0.141793	5.67173
		0.46213	0.23707	0.30853	0.55383	0.366477	0.183238	7.32953		0.46213	0.32303	0.16314	0.29227	0.25948	10.3792
		0.52815	0.24312	0.51998	0.67667	0.479923	0.239962	9.59847		0.52815	0.20315	0.18668	0.40645	0.265427	10.6171
		0.59417	0.32628	0.5805	0.82211	0.576297	0.288148	11.5259		0.59417	0.25159	0.17193	0.7509	0.391473	15.6589
		0.66019	0.43655	0.74178	1.109	0.762443	0.381222	15.2489		0.66019	0.33567	0.27682	1.31797	0.643487	25.7395
		0.72621	0.73061	1.01881	1.09294	0.947453	0.473727	18.9491		0.72621	0.46917	0.55832	1.68272	0.903403	36.1361
		0.79223	0.80189	1.17406	1.27895	1.08497	0.542483	21.6993		0.79223	0.85598	0.90543	1.7799	1.18044	47.2175
		0.85825	1.37139	1.28548	1.09375	1.25021	0.625103	25.0041		0.85825	1.2925	1.16796	1.99625	1.48557	59.4228
		0.92427	1.36384	1.12038	1.13976	1.20799	0.603997	24.1599		0.92427	1.71935	1.44942	1.75528	1.64135	65.654
		0.99029	1.0901	0.97904	0.78672	0.951953	0.475977	19.0391		0.99029	2.04946	1.49161	1.3369	1.62599	65.0396
		1.05631	1.09315	0.86775	0.61268	0.85786	0.42893	17.1572		1.05631	1.81697	1.37298	1.23319	1.47438	58.9752
		1.12232	0.83985	0.79673	0.46718	0.701253	0.350627	14.0251		1.12232	1.56339	1.04006	1.13078	1.24474	49.7897
		1.18834	0.63362	0.61755	0.51023	0.587133	0.293567	11.7427		1.18834	1.33869	0.60012	0.93789	0.9589	38.356
		1.25436	0.37442	0.55367	0.4871	0.47173	0.235865	9.4346		1.25436	0.95818	0.72563	0.95478	0.87953	35.1812
		1.32038	0.49138	0.29165	0.34794	0.37699	0.188495	7.5398		1.32038	0.73397	0.75177	1.04196	0.842567	33.7027
		1.3864	0.45672	0.31375	0.33716	0.36921	0.184605	7.3842		1.3864	0.64876	0.66045	0.84546	0.718223	28.7289
		1.45242	0.4783	0.43581	0.27899	0.3977	0.19885	7.954		1.45242	0.71136	0.65734	0.85886	0.74252	29.7008
		1.51844	0.55596	0.48228	0.45054	0.49626	0.24813	9.9252		1.51844	0.88785	0.6924	0.99269	0.857647	34.3059
		1.58446	0.75362	0.47887	0.41954	0.550677	0.275338	11.0135		1.58446	1.04118	0.88902	1.07419	1.00146	40.0585
		1.65048	0.85146	0.63974	0.55159	0.68093	0.340465	13.6186		1.65048	1.27958	1.03493	1.25662	1.19038	47.6151
		1.7165	1.16451	0.86584	0.75797	0.92944	0.46472	18.5888		1.7165	1.49775	1.19799	1.44159	1.37911	55.1644
		1.78252	1.06537	0.99187	0.93469	0.99731	0.498655	19.9462		1.78252	1.53874	1.41141	1.59524	1.51513	60.6052
		1.84853	1.04759	1.24267	1.1039	1.13139	0.565693	22.6277		1.84853	1.65232	1.32447	1.65306	1.54328	61.7313
		1.91455	0.88222	1.05666	1.20076	1.04655	0.523273	20.9309		1.91455	1.0855	1.31715	1.34548	1.24938	49.9751
		1.98057	0.87588	0.91978	1.26555	1.0204	0.510202	20.4081		1.98057	0.93075	0.94849	0.89913	0.926123	37.0449
		2.04659	0.76314	0.7027	0.74853	0.738123	0.369062	14.7625		2.04659	0.53635	0.748	0.62383	0.63606	25.4424
		2.11261	0.71586	0.76122	0.65168	0.709587	0.354793	14.1917		2.11261	0.44633	0.53925	0.51597	0.500517	20.0207
		2.17863	0.7504	0.50241	0.51437	0.58906	0.29453	11.7812		2.17863	0.18193	0.33321	0.33621	0.283783	11.3513
		2.24465	0.52064	0.44708	0.51441	0.494043	0.247022	9.88087		2.24465	0.26535	0.33234	0.19287	0.26352	10.5408
		2.31067	0.40414	0.28574	0.61116	0.43368	0.21684	8.6736		2.31067	0.20601	0.32419	0.19754	0.24258	9.7032
		2.37669	0.46969	0.28724	0.54113	0.432687	0.216343	8.65373		2.37669	0.26254	0.24176	0.14659	0.216963	8.67853
		2.44271	0.39857	0.21475	0.47151	0.36161	0.180805	7.2322		2.44271	0.14587	0.21949	0.15853	0.17463	6.9852
		2.50873	0.28921	0.20599	0.43356	0.309587	0.154793	6.19173		2.50873	0.10154	0.21541	0.13744	0.151463	6.05853
		2.57474	0.2314	0.20194	0.2505	0.227947	0.113973	4.55893		2.57474	0.16218	0.29108	0.04606	0.16644	6.6576
		2.64076	0.28897	0.14406	0.18448	0.205837	0.102918	4.11673		2.64076	0.26295	0.14221	0.09326	0.16614	6.6456
		2.70678	0.31085	0.14214	0.10229	0.185093	0.0925467	3.70187		2.70678	0.37371	0.13635	0.14872	0.219593	8.78373
		2.7728	0.18813	0.17519	0.09361	0.15231	0.076155	3.0462		2.7728	0.50579	0.17846	0.13773	0.273993	10.9597
		image002
		yellow channel (par-6-zf1-yfp)	measurements					multiply to fit to y-axis		red channel (par-3-mCh)	measurements				multiply to fit to y-axis
		distance (microns)	m1	m2	m3	avg	normalized to mCh	*40		distance (microns)	m1	m2	m3	avg	*40
		0	0.55797	1.07428	1.45342	1.02856	0.514278	20.5711		0	0.4593	0.60475	0.48809	0.51738	20.6952
		0.06602	0.80056	1.28834	1.46776	1.18555	0.592777	23.7111		0.06602	0.39095	0.48494	0.35039	0.40876	16.3504
		0.13204	0.90943	1.26128	1.4298	1.20017	0.600085	24.0034		0.13204	0.40789	0.56942	0.43859	0.471967	18.8787
		0.19806	0.96139	1.50205	1.38967	1.28437	0.642185	25.6874		0.19806	0.41831	0.55667	0.30555	0.426843	17.0737
		0.26408	1.20068	1.51142	1.37868	1.36359	0.681797	27.2719		0.26408	0.42279	0.62864	0.27109	0.44084	17.6336
		0.3301	1.09277	1.71902	1.87732	1.56304	0.781518	31.2607		0.3301	0.47951	0.47137	0.35922	0.4367	17.468
		0.39611	1.30236	2.15319	2.03113	1.82889	0.914447	36.5779		0.39611	0.45591	0.52987	0.36469	0.450157	18.0063
		0.46213	1.41304	2.0353	2.10015	1.8495	0.924748	36.9899		0.46213	0.34735	0.54814	0.50768	0.467723	18.7089
		0.52815	2.10859	2.14622	2.20805	2.15429	1.07714	43.0857		0.52815	0.43138	0.57338	0.49838	0.501047	20.0419
		0.59417	2.14926	2.43153	2.61684	2.39921	1.19961	47.9842		0.59417	0.46441	0.61333	0.59449	0.55741	22.2964
		0.66019	2.06783	3.24879	2.91254	2.74305	1.37153	54.8611		0.66019	0.46457	0.6916	0.83329	0.663153	26.5261
		0.72621	2.31664	4.17142	3.31907	3.26904	1.63452	65.3809		0.72621	0.62189	0.88515	1.02093	0.842657	33.7063
		0.79223	2.59272	5.52667	3.78394	3.96778	1.98389	79.3555		0.79223	1.0347	1.32055	1.50243	1.28589	51.4357
		0.85825	3.07801	6.41187	4.3935	4.62779	2.3139	92.5559		0.85825	1.58835	2.27154	1.59934	1.81974	72.7897
		0.92427	3.75214	6.42144	4.29259	4.82206	2.41103	96.4411		0.92427	1.99384	2.7771	1.76394	2.17829	87.1317
		0.99029	4.23807	5.74696	4.12805	4.70436	2.35218	94.0872		0.99029	2.43994	2.86444	2.21448	2.50629	100.251
		1.05631	4.04995	4.91449	4.16722	4.37722	2.18861	87.5444		1.05631	2.4815	2.66913	2.07273	2.40779	96.3115
		1.12232	3.87813	4.10992	4.48076	4.15627	2.07814	83.1254		1.12232	1.85394	2.33059	1.75639	1.98031	79.2123
		1.18834	3.70507	3.74693	4.20003	3.88401	1.942	77.6802		1.18834	1.92087	1.88772	1.66822	1.8256	73.0241
		1.25436	3.39704	3.83662	3.68227	3.63864	1.81932	72.7729		1.25436	1.81044	1.96892	1.52734	1.7689	70.756
		1.32038	3.01687	3.43179	3.02156	3.15674	1.57837	63.1348		1.32038	1.79238	2.10674	1.40832	1.76915	70.7659
		1.3864	3.23894	3.72355	3.01026	3.32425	1.66212	66.485		1.3864	1.65224	1.94168	1.47347	1.68913	67.5652
		1.45242	3.35592	3.37204	3.21238	3.31345	1.65672	66.2689		1.45242	1.81341	1.95895	1.67991	1.81742	72.6969
		1.51844	3.93206	3.4425	3.74098	3.70518	1.85259	74.1036		1.51844	1.84538	1.98036	1.78174	1.86916	74.7664
		1.58446	4.72148	4.08242	4.2692	4.3577	2.17885	87.154		1.58446	2.39946	2.16093	1.95195	2.17078	86.8312
		1.65048	4.90653	4.62774	4.94005	4.82477	2.41239	96.4955		1.65048	2.9432	2.45348	2.10126	2.49931	99.9725
		1.7165	4.95637	5.04858	5.39199	5.13231	2.56616	102.646		1.7165	2.88754	2.86924	2.28662	2.68113	107.245
		1.78252	4.97385	5.80959	5.57765	5.4537	2.72685	109.074		1.78252	2.80576	2.93847	2.17242	2.63888	105.555
		1.84853	4.56346	5.5622	4.79578	4.97381	2.48691	99.4763		1.84853	2.43292	2.95706	1.6774	2.35579	94.2317
		1.91455	4.19991	5.25024	4.10386	4.518	2.259	90.3601		1.91455	1.96741	2.59201	1.55894	2.03945	81.5781
		1.98057	3.87134	4.57164	3.59754	4.01351	2.00675	80.2701		1.98057	1.46895	1.98384	1.05912	1.50397	60.1588
		2.04659	2.8459	4.16291	3.10287	3.37056	1.68528	67.4112		2.04659	1.1434	1.29706	0.88267	1.10771	44.3084
		2.11261	2.5123	3.60327	2.76833	2.9613	1.48065	59.226		2.11261	0.86503	1.13675	0.56418	0.85532	34.2128
		2.17863	1.95276	3.46829	2.1882	2.53642	1.26821	50.7283		2.17863	0.74537	0.77681	0.42735	0.649843	25.9937
		2.24465	1.72788	3.0279	1.80184	2.18587	1.09294	43.7175		2.24465	0.53831	0.62836	0.27838	0.481683	19.2673
		2.31067	1.67522	2.81629	1.53955	2.01035	1.00518	40.2071		2.31067	0.32507	0.54926	0.44071	0.438347	17.5339
		2.37669	1.46701	2.61486	1.49767	1.85985	0.929923	37.1969		2.37669	0.37274	0.47298	0.29253	0.379417	15.1767
		2.44271	1.40075	2.33627	1.30618	1.68107	0.840533	33.6213		2.44271	0.255	0.41043	0.41962	0.361683	14.4673
		2.50873	1.19137	2.26435	1.16983	1.54185	0.770925	30.837		2.50873	0.27775	0.51653	0.22129	0.338523	13.5409
		2.57474	1.09365	2.24263	1.00404	1.44677	0.723387	28.9355		2.57474	0.14153	0.47254	0.27711	0.29706	11.8824
		2.64076	1.02042	2.02627	0.87852	1.3084	0.654202	26.1681		2.64076	0.12325	0.41672	0.19736	0.245777	9.83107
		2.70678	0.67624	1.99226	1.00379	1.2241	0.612048	24.4819		2.70678	0.18919	0.62671	0.21475	0.34355	13.742
		2.7728	0.53861	2.2556	0.73247	1.17556	0.58778	23.5112		2.7728	0.33202	0.65209	0.3462	0.443437	17.7375

## Sheet: Figure 3H - source data
		Figure 3H - source data. Fluorescent intensity values for line trace measurements of PAR-6::ZF1::YFP; PAR-3::mCherry and ZF1::YFP::CDC-42; PAR-6::mKate.
		cdc-42(xn65); par-6(cp60) replicate3 072220
		larvae019
		red channel (par-6-mkate)	measurements				multiply to fit to y-axis		yellow channel (zf1-yfp-cdc-42)	measurements					multiply to fit to y-axis
		distance (microns)	m1	m2	m3	avg	x30		distance (microns)	m1	m2	m3	avg	normalized to red	x30
		0	0.82623	1.01885	1.40013	1.08174	32.4521		0	6.3123	14.1275	15.8123	12.084	1.72802	51.8405
		0.07222	0.84099	1.21405	1.52273	1.19259	35.7777		0.07222	6.6586	15.2637	16.9678	12.9634	1.85376	55.6128
		0.14444	1.11154	1.26168	1.75903	1.37742	41.3225		0.14444	7.8434	17.6179	19.4617	14.9743	2.14133	64.2399
		0.21666	0.8402	1.22478	1.69821	1.2544	37.6319		0.21666	10.289	18.5015	21.3053	16.6986	2.3879	71.637
		0.28888	0.92702	1.39489	1.72014	1.34735	40.4205		0.28888	12.6912	19.9054	22.0817	18.2261	2.60633	78.19
		0.3611	1.19218	1.43709	1.70077	1.44335	43.3004		0.3611	14.4506	21.0289	22.2206	19.2334	2.75037	82.5111
		0.43332	1.54344	1.45831	1.95198	1.65124	49.5373		0.43332	16.2642	21.1503	21.8777	19.7641	2.82626	84.7878
		0.50554	1.39159	1.62541	2.16319	1.72673	51.8019		0.50554	17.0669	21.3366	20.728	19.7105	2.8186	84.558
		0.57776	1.32513	1.76724	2.23808	1.77682	53.3045		0.57776	17.8357	20.2202	21.2901	19.782	2.82883	84.8648
		0.64998	1.67554	2.24278	1.81684	1.91172	57.3516		0.64998	18.2243	19.3455	21.0117	19.5272	2.79238	83.7715
		0.7222	1.79842	2.5623	1.8698	2.07684	62.3052		0.7222	18.8992	18.3153	20.2818	19.1654	2.74066	82.2197
		0.79443	2.5405	2.62924	2.28014	2.48329	74.4988		0.79443	18.6068	17.4614	18.2161	18.0948	2.58755	77.6265
		0.86665	3.10874	2.39021	2.36265	2.62053	78.616		0.86665	17.4964	16.1572	16.6968	16.7835	2.40004	72.0011
		0.93887	2.97057	2.52714	2.46466	2.65412	79.6237		0.93887	15.2437	14.444	14.5852	14.7576	2.11034	63.3102
		1.01109	2.91244	2.48775	1.88945	2.42988	72.8964		1.01109	12.8069	11.7798	11.5677	12.0515	1.72336	51.7008
		1.08331	1.92325	1.53243	1.7591	1.73826	52.1478		1.08331	10.388	9.7188	9.2794	9.7954	1.40074	42.0223
		1.15553	1.38444	1.33594	1.19794	1.30611	39.1832		1.15553	8.4557	8.3515	8.4627	8.4233	1.20453	36.136
		1.22775	1.20957	1.11557	1.07319	1.13278	33.9833		1.22775	7.3958	7.7468	7.1877	7.44343	1.06441	31.9323
		1.29997	1.22829	1.14487	1.2038	1.19232	35.7696		1.29997	7.5698	6.6839	7.1116	7.12177	1.01841	30.5524
		1.37219	1.15359	0.95467	1.26387	1.12404	33.7213		1.37219	7.5311	6.3262	7.2812	7.04617	1.0076	30.2281
		1.44441	1.30478	1.04099	1.29869	1.21482	36.4446		1.44441	7.0672	6.7534	7.343	7.05453	1.0088	30.2639
		1.51663	1.31353	0.89408	1.37904	1.19555	35.8665		1.51663	6.805	6.8612	7.7039	7.12337	1.01864	30.5592
		1.58885	1.31095	1.0761	1.599	1.32868	39.8605		1.58885	7.3719	7.2937	8.3646	7.67673	1.09777	32.9332
		1.66107	1.25272	1.38941	1.75823	1.46679	44.0036		1.66107	8.1695	8.2823	9.6334	8.69507	1.24339	37.3018
		1.73329	1.64145	1.72336	2.23446	1.86642	55.9927		1.73329	9.0496	9.3526	10.5565	9.6529	1.38036	41.4109
		1.80551	2.25667	2.15171	2.53091	2.3131	69.3929		1.80551	10.7172	11.0378	11.661	11.1387	1.59283	47.7849
		1.87773	2.99708	2.39033	2.71671	2.70137	81.0412		1.87773	12.8402	12.6995	13.0222	12.854	1.83812	55.1435
		1.94995	3.40485	2.65616	2.59323	2.88475	86.5424		1.94995	16.0336	14.9919	15.3791	15.4682	2.21195	66.3586
		2.02217	3.43347	2.95889	2.6049	2.99909	89.9726		2.02217	17.9736	17.4594	17.2929	17.5753	2.51327	75.398
		2.09439	2.64783	2.71071	2.52155	2.6267	78.8009		2.09439	19.2864	19.2293	18.0485	18.8547	2.69623	80.8868
		2.16661	2.40161	2.03851	2.37323	2.27112	68.1335		2.16661	18.8211	19.9818	20.2352	19.6794	2.81415	84.4245
		2.23884	1.99804	1.79566	1.794	1.86257	55.877		2.23884	17.7944	20.3221	19.6712	19.2626	2.75455	82.6364
		2.31106	1.59561	1.49203	1.65191	1.57985	47.3955		2.31106	17.582	20.2906	19.1391	19.0039	2.71756	81.5267
		2.38328	1.5447	1.24183	1.26482	1.35045	40.5135		2.38328	18.1189	20.4072	18.4088	18.9783	2.7139	81.4169
		2.4555	1.58062	1.35599	0.97891	1.30517	39.1552		2.4555	16.5113	19.6164	16.9515	17.6931	2.53011	75.9033
		2.52772	1.25046	1.05679	1.20628	1.17118	35.1353		2.52772	15.2427	18.3208	14.8672	16.1436	2.30853	69.2559
		2.59994	1.43445	1.15498	1.00094	1.19679	35.9037		2.59994	14.0029	17.2336	12.8471	14.6945	2.10132	63.0395
		2.67216	1.43053	1.35461	0.64035	1.14183	34.2549		2.67216	12.3207	17.0615	11.6227	13.6683	1.95457	58.637
		2.74438	1.39134	1.2428	0.84205	1.15873	34.7619		2.74438	9.9683	15.4032	9.8136	11.7284	1.67716	50.3147
		larvae020
		red channel (par-6-mkate)	measurements				multiply to fit to y-axis		yellow channel (zf1-yfp-cdc-42)	measurements					multiply to fit to y-axis
		distance (microns)	m1	m2	m3	avg	x30		distance (microns)	m1	m2	m3	avg	normalized to red	x30
		0	0.37743	0.56369	0.74243	0.561183	16.8355		0	5.5197	7.1575	5.0635	5.91357	0.84564	25.3692
		0.07222	0.50278	0.47783	0.9229	0.634503	19.0351		0.07222	5.7683	6.961	6.0072	6.2455	0.893106	26.7932
		0.14444	0.55889	0.58283	1.01489	0.71887	21.5661		0.14444	5.8225	7.0717	6.9287	6.60763	0.944892	28.3467
		0.21666	0.59611	0.64675	0.91413	0.718997	21.5699		0.21666	6.2228	7.6162	7.7509	7.19663	1.02912	30.8736
		0.28888	0.86426	0.70411	0.92801	0.832127	24.9638		0.28888	6.3185	7.7584	7.9129	7.32993	1.04818	31.4454
		0.3611	1.05201	0.75854	1.24055	1.01703	30.511		0.3611	7.0363	7.7893	8.0895	7.63837	1.09229	32.7686
		0.43332	1.166	0.85294	1.40259	1.14051	34.2153		0.43332	8.0125	8.256	9.2585	8.509	1.21679	36.5036
		0.50554	1.09138	0.95401	1.2985	1.11463	33.4389		0.50554	8.9499	8.7572	9.8329	9.18	1.31274	39.3822
		0.57776	1.32732	1.1116	1.47644	1.30512	39.1536		0.57776	9.8994	9.2225	10.7843	9.96873	1.42553	42.7659
		0.64998	1.39071	1.24495	1.64084	1.4255	42.765		0.64998	10.4965	9.3711	12.1121	10.6599	1.52437	45.731
		0.7222	1.33461	1.34694	2.39275	1.69143	50.743		0.7222	10.8123	10.2896	12.9191	11.3403	1.62167	48.65
		0.79443	1.50225	1.54542	2.7591	1.93559	58.0677		0.79443	11.9248	11.3453	13.3233	12.1978	1.74429	52.3286
		0.86665	2.13364	2.00645	2.82676	2.32228	69.6685		0.86665	12.9529	12.4668	13.6034	13.0077	1.8601	55.803
		0.93887	2.64654	2.4655	2.9098	2.67395	80.2184		0.93887	12.8509	12.8477	13.1512	12.9499	1.85184	55.5552
		1.01109	2.57883	2.73356	2.52656	2.61298	78.3895		1.01109	11.3961	13.1471	11.3414	11.9615	1.7105	51.315
		1.08331	2.58228	2.65615	1.85758	2.36534	70.9601		1.08331	9.5658	12.6226	9.8835	10.6906	1.52876	45.8628
		1.15553	2.1344	1.98845	1.65053	1.92446	57.7338		1.15553	8.3265	10.4373	7.848	8.8706	1.2685	38.0549
		1.22775	1.79517	1.55792	1.19859	1.51723	45.5168		1.22775	7.2078	8.372	6.8432	7.47433	1.06883	32.0649
		1.29997	1.18456	1.10306	1.13051	1.13938	34.1813		1.29997	6.5078	7.1742	6.5375	6.73983	0.963796	28.9139
		1.37219	1.14167	1.08125	1.23855	1.15382	34.6147		1.37219	6.1151	6.3695	6.3751	6.28657	0.898979	26.9694
		1.44441	1.22149	1.1418	1.18005	1.18111	35.4334		1.44441	5.7074	6.0823	6.1587	5.9828	0.85554	25.6662
		1.51663	1.27825	1.17408	0.88671	1.11301	33.3904		1.51663	5.3576	6.1856	6.7859	6.1097	0.873687	26.2106
		1.58885	1.12409	1.34492	1.09753	1.18885	35.6654		1.58885	5.8975	6.3569	7.7429	6.66577	0.953205	28.5961
		1.66107	1.06849	1.26502	1.17638	1.16996	35.0989		1.66107	6.29	6.4935	8.5857	7.12307	1.0186	30.558
		1.73329	1.5906	1.53869	1.77453	1.63461	49.0382		1.73329	7.1966	6.9775	9.4006	7.85823	1.12373	33.7118
		1.80551	2.06317	1.73411	2.0912	1.96283	58.8848		1.80551	8.9509	8.6898	10.1627	9.2678	1.3253	39.7589
		1.87773	2.65098	2.27953	2.53385	2.48812	74.6436		1.87773	11.0643	10.0612	11.442	10.8558	1.55238	46.5715
		1.94995	2.88564	3.19834	2.74823	2.94407	88.3221		1.94995	12.5628	12.3469	12.1759	12.3619	1.76775	53.0324
		2.02217	2.73801	3.02075	2.47787	2.74554	82.3663		2.02217	13.1745	13.7949	12.2182	13.0625	1.86794	56.0383
		2.09439	1.93956	2.31697	2.05977	2.10543	63.163		2.09439	12.7752	13.9986	11.6442	12.806	1.83126	54.9377
		2.16661	1.63586	1.65387	1.82733	1.70569	51.1706		2.16661	12.6347	12.9511	10.9436	12.1765	1.74123	52.237
		2.23884	1.51696	1.63778	1.55921	1.57132	47.1395		2.23884	12.0561	12.1415	9.6652	11.2876	1.61413	48.4238
		2.31106	1.44098	1.1711	1.27044	1.29417	38.8252		2.31106	11.4977	11.173	9.1835	10.6181	1.51838	45.5515
		2.38328	1.32613	1.33739	1.31036	1.32463	39.7388		2.38328	10.3251	9.9587	8.0219	9.43523	1.34924	40.4772
		2.4555	0.94984	1.18198	1.42394	1.18525	35.5576		2.4555	9.7666	9.6442	6.4308	8.61387	1.23178	36.9535
		2.52772	0.87912	0.79401	1.41883	1.03065	30.9196		2.52772	8.2282	9.1144	5.0526	7.46507	1.0675	32.0251
		2.59994	0.76053	0.71363	1.43353	0.96923	29.0769		2.59994	6.5935	7.4446	3.8826	5.97357	0.85422	25.6266
		2.67216	0.63163	0.57427	1.41377	0.873223	26.1967		2.67216	5.0877	5.339	2.7403	4.389	0.627627	18.8288
		2.74438	0.63915	0.57379	1.3367	0.84988	25.4964		2.74438	3.9475	4.4236	2.2396	3.5369	0.505777	15.1733
		larvae009
		red channel (par-6-mkate)	measurements				multiply to fit to y-axis		yellow channel (zf1-yfp-cdc-42)	measurements					multiply to fit to y-axis
		distance (microns)	m1	m2	m3	avg	x30		distance (microns)	m1	m2	m3	avg	normalized to red	x30
		0	0.39932	0.56926	0.31149	0.42669	12.8007		0	4.7569	3.6075	4.9255	4.42997	0.633485	19.0046
		0.07222	0.41019	0.65719	0.36053	0.47597	14.2791		0.07222	5.1057	4.1553	5.3346	4.8652	0.695724	20.8717
		0.14444	0.36244	0.64077	0.36959	0.4576	13.728		0.14444	5.8785	5.0788	5.7336	5.56363	0.7956	23.868
		0.21666	0.38509	0.6322	0.48206	0.499783	14.9935		0.21666	6.5122	6.3493	6.5449	6.4688	0.925038	27.7512
		0.28888	0.3544	0.6885	0.52087	0.521257	15.6377		0.28888	8.4618	7.7208	7.6728	7.9518	1.13711	34.1132
		0.3611	0.41713	0.68619	0.54474	0.549353	16.4806		0.3611	10.3459	9.9432	9.1889	9.826	1.40512	42.1535
		0.43332	0.40555	0.59526	0.56143	0.520747	15.6224		0.43332	11.7921	11.6743	10.9586	11.475	1.64092	49.2277
		0.50554	0.65673	0.64671	0.5943	0.63258	18.9774		0.50554	13.4768	13.3205	13.4515	13.4163	1.91853	57.5558
		0.57776	0.61524	0.71655	0.46264	0.598143	17.9443		0.57776	13.8967	14.1633	14.9115	14.3238	2.04831	61.4492
		0.64998	0.71773	0.6219	0.60416	0.64793	19.4379		0.64998	14.6791	14.6483	15.1424	14.8233	2.11973	63.5918
		0.7222	1.10603	0.93272	0.6687	0.902483	27.0745		0.7222	15.4663	14.3356	15.7944	15.1988	2.17342	65.2027
		0.79443	0.89933	1.25333	0.69894	0.950533	28.516		0.79443	15.9681	13.9771	15.2803	15.0752	2.15575	64.6725
		0.86665	1.16665	1.59834	0.95723	1.24074	37.2222		0.86665	15.4622	14.2094	14.5517	14.7411	2.10798	63.2393
		0.93887	1.72578	1.90236	1.64633	1.75816	52.7447		0.93887	15.3547	13.1846	13.5556	14.0316	2.00652	60.1957
		1.01109	2.07076	2.03118	2.28086	2.1276	63.828		1.01109	14.1741	11.3802	12.9208	12.825	1.83398	55.0194
		1.08331	2.55364	1.82853	2.11731	2.16649	64.9948		1.08331	12.7499	9.3361	11.4532	11.1797	1.5987	47.9611
		1.15553	2.35257	1.53603	2.26223	2.05028	61.5083		1.15553	11.5622	7.739	9.4524	9.58453	1.37059	41.1176
		1.22775	1.82521	1.30186	1.9285	1.68519	50.5557		1.22775	10.0186	7.455	8.5711	8.68157	1.24146	37.2439
		1.29997	1.43175	1.06471	1.50878	1.33508	40.0524		1.29997	8.0529	6.6236	7.1716	7.2827	1.04143	31.2428
		1.37219	1.0692	1.04493	1.45784	1.19066	35.7197		1.37219	7.2523	6.7622	6.6241	6.87953	0.983773	29.5132
		1.44441	0.98663	1.0431	1.13478	1.05484	31.6451		1.44441	7.9532	6.5215	6.861	7.1119	1.017	30.5101
		1.51663	1.43774	0.86195	1.18781	1.1625	34.875		1.51663	8.3166	6.9279	7.7077	7.65073	1.09405	32.8216
		1.58885	1.86361	0.99368	1.343	1.4001	42.0029		1.58885	9.4114	8.1954	8.8344	8.81373	1.26036	37.8109
		1.66107	2.11907	1.59055	1.74463	1.81808	54.5425		1.66107	11.3473	9.8732	10.9026	10.7077	1.5312	45.936
		1.73329	2.23547	1.90762	2.08992	2.07767	62.3301		1.73329	13.2902	12.4476	13.1384	12.9587	1.8531	55.593
		1.80551	2.18215	2.38944	1.92809	2.16656	64.9968		1.80551	14.5667	15.6168	15.2752	15.1529	2.16686	65.0059
		1.87773	1.50809	2.1133	1.4863	1.70256	51.0769		1.87773	14.9697	17.0301	16.2201	16.0733	2.29848	68.9545
		1.94995	1.22418	1.61227	1.23501	1.35715	40.7146		1.94995	14.9664	17.571	16.6571	16.3982	2.34494	70.3481
		2.02217	0.76721	1.19496	0.91526	0.959143	28.7743		2.02217	14.6288	16.6157	15.6329	15.6258	2.23449	67.0347
		2.09439	0.7912	1.03893	0.87741	0.902513	27.0754		2.09439	13.7189	15.3945	14.8207	14.6447	2.09419	62.8258
		2.16661	0.78794	1.02068	0.91684	0.908487	27.2546		2.16661	11.6298	13.9723	13.4437	13.0153	1.86118	55.8355
		2.23884	0.65469	0.91901	0.65164	0.74178	22.2534		2.23884	9.2163	11.8753	11.0284	10.7067	1.53105	45.9316
		2.31106	0.57378	0.79039	0.68689	0.683687	20.5106		2.31106	7.2774	9.8634	9.6288	8.9232	1.27602	38.2805
		2.38328	0.42267	0.6371	0.67218	0.577317	17.3195		2.38328	6.2474	7.8081	7.7192	7.25823	1.03793	31.1378
		2.4555	0.48595	0.55063	0.59545	0.54401	16.3203		2.4555	5.0805	6.4734	6.6017	6.05187	0.865417	25.9625
		2.52772	0.44674	0.37318	0.66061	0.49351	14.8053		2.52772	4.6241	5.3685	5.4618	5.15147	0.73666	22.0998
		2.59994	0.46648	0.3509	0.55502	0.457467	13.724		2.59994	4.4286	4.7652	4.4436	4.5458	0.650049	19.5015
		2.67216	0.32523	0.35538	0.58344	0.42135	12.6405		2.67216	4.2023	3.7563	3.6353	3.86463	0.552643	16.5793
		2.74438	0.27694	0.38351	0.57896	0.413137	12.3941		2.74438	3.3966	3.2179	3.0803	3.2316	0.462119	13.8636
		larvae016
		red channel (par-6-mkate)	measurements				multiply to fit to y-axis		yellow channel (zf1-yfp-cdc-42)	measurements					multiply to fit to y-axis
		distance (microns)	m1	m2	m3	avg	x30		distance (microns)	m1	m2	m3	avg	normalized to red	x30
		0	0.43754	0.16481	0.43163	0.34466	10.3398		0	6.2461	2.126	4.0013	4.12447	0.589799	17.694
		0.07222	0.41708	0.17745	0.39903	0.331187	9.9356		0.07222	6.8344	3.0117	4.0719	4.63933	0.663425	19.9027
		0.14444	0.4205	0.20961	0.71733	0.449147	13.4744		0.14444	7.3902	3.3337	4.3844	5.0361	0.720162	21.6049
		0.21666	0.56916	0.26161	0.70491	0.511893	15.3568		0.21666	8.2963	4.3621	5.025	5.89447	0.842909	25.2873
		0.28888	0.6689	0.3746	0.74357	0.59569	17.8707		0.28888	9.2249	5.6956	6.0437	6.98807	0.999294	29.9788
		0.3611	0.77893	0.74734	0.90371	0.809993	24.2998		0.3611	10.8958	7.1919	7.9253	8.671	1.23995	37.1986
		0.43332	0.95406	0.97659	0.8098	0.913483	27.4045		0.43332	12.9161	8.5885	9.8365	10.447	1.49393	44.8178
		0.50554	0.84163	0.81006	0.81052	0.820737	24.6221		0.50554	14.469	10.0918	11.3234	11.9614	1.71048	51.3144
		0.57776	1.16704	0.76654	1.03447	0.98935	29.6805		0.57776	15.7635	13.4318	13.1516	14.1156	2.01854	60.5561
		0.64998	1.237	0.67569	0.93344	0.94871	28.4613		0.64998	16.5167	16.0011	15.9347	16.1508	2.30957	69.2871
		0.7222	1.46072	0.96521	1.07711	1.16768	35.0304		0.7222	17.9932	17.5044	17.6564	17.718	2.53367	76.0102
		0.79443	1.66609	0.76759	1.5291	1.32093	39.6278		0.79443	18.1198	18.5263	18.7101	18.4521	2.63865	79.1594
		0.86665	2.28584	1.32689	1.73024	1.78099	53.4297		0.86665	16.98	18.2732	19.1511	18.1348	2.59327	77.7981
		0.93887	2.44919	1.65921	1.86029	1.98956	59.6869		0.93887	14.958	17.9723	19.7279	17.5527	2.51004	75.3012
		1.01109	1.76942	2.04733	2.40088	2.07254	62.1763		1.01109	12.1965	16.88	16.8434	15.3066	2.18885	65.6655
		1.08331	1.4852	2.09713	2.05923	1.88052	56.4156		1.08331	10.0271	13.5862	13.8911	12.5015	1.78771	53.6313
		1.15553	1.34168	1.45434	1.71292	1.50298	45.0894		1.15553	8.9822	11.7075	11.4314	10.707	1.53111	45.9332
		1.22775	0.98121	1.27279	1.2272	1.1604	34.812		1.22775	8.1641	10.1397	9.9709	9.4249	1.34776	40.4328
		1.29997	0.91412	1.05276	1.13319	1.03336	31.0007		1.29997	7.8323	9.0834	9.0973	8.671	1.23995	37.1986
		1.37219	0.7751	0.87402	1.08078	0.909967	27.299		1.37219	7.7849	8.86	8.9383	8.52773	1.21947	36.584
		1.44441	0.76889	0.91221	1.0868	0.922633	27.679		1.44441	8.0678	8.6298	8.8084	8.502	1.21579	36.4736
		1.51663	1.03273	1.06707	1.25188	1.11723	33.5168		1.51663	8.2891	9.3012	8.8348	8.80837	1.2596	37.7879
		1.58885	1.44589	1.15773	1.49588	1.3665	40.995		1.58885	9.3112	10.2572	9.9906	9.853	1.40898	42.2694
		1.66107	1.99371	1.90558	2.17917	2.02615	60.7846		1.66107	11.4408	12.9909	12.0395	12.1571	1.73846	52.1538
		1.73329	2.25203	2.17904	2.72153	2.3842	71.526		1.73329	13.6776	16.4765	14.9097	15.0213	2.14804	64.4412
		1.80551	2.14737	2.37918	2.75557	2.42737	72.8212		1.80551	16.0674	18.4545	18.8871	17.803	2.54583	76.3749
		1.87773	1.67464	2.2554	2.19186	2.04063	61.219		1.87773	16.9851	19.1486	20.6503	18.928	2.7067	81.2011
		1.94995	1.30372	1.64113	1.7779	1.57425	47.2275		1.94995	18.4318	20.1198	20.234	19.5952	2.80211	84.0634
		2.02217	1.01408	1.44416	1.09278	1.18367	35.5102		2.02217	18.1253	19.6306	19.6186	19.1248	2.73485	82.0455
		2.09439	1.08017	0.98673	0.83167	0.96619	28.9857		2.09439	16.8543	19.2979	18.3249	18.159	2.59674	77.9023
		2.16661	0.95394	0.95257	0.55327	0.819927	24.5978		2.16661	15.889	16.9863	16.8824	16.5859	2.37178	71.1535
		2.23884	0.98376	0.83431	0.52613	0.7814	23.442		2.23884	14.1577	14.5305	15.1375	14.6086	2.08903	62.6708
		2.31106	0.98742	0.53635	0.48044	0.66807	20.0421		2.31106	12.4417	13.3734	14.0389	13.2847	1.89971	56.9912
		2.38328	0.7514	0.45627	0.6649	0.62419	18.7257		2.38328	10.0699	11.7853	11.728	11.1944	1.6008	48.024
		2.4555	0.84732	0.63735	0.67169	0.718787	21.5636		2.4555	7.4913	10.9282	9.4415	9.287	1.32804	39.8412
		2.52772	0.77387	0.62506	0.57883	0.659253	19.7776		2.52772	6.3021	9.8067	8.6092	8.23933	1.17822	35.3467
		2.59994	0.75926	0.62961	0.75914	0.716003	21.4801		2.59994	5.7753	8.1176	7.5781	7.157	1.02345	30.7035
		2.67216	0.50759	0.75436	0.71178	0.65791	19.7373		2.67216	5.7142	7.3794	6.9686	6.6874	0.956298	28.6889
		2.74438	0.64929	0.66011	0.82056	0.709987	21.2996		2.74438	4.8315	5.9962	6.5914	5.80637	0.83031	24.9093
		larvae013
		red channel (par-6-mkate)	measurements				multiply to fit to y-axis		yellow channel (zf1-yfp-cdc-42)	measurements					multiply to fit to y-axis
		distance (microns)	m1	m2	m3	avg	x30		distance (microns)	m1	m2	m3	avg	normalized to red	x30
		0	0.43939	0.3785	0.54208	0.453323	13.5997		0	6.5688	4.8328	8.03324	6.47828	0.926394	27.7918
		0.07222	0.49094	0.35975	0.59793	0.482873	14.4862		0.07222	7.8689	4.975	8.95382	7.26591	1.03902	31.1707
		0.14444	0.31001	0.43192	0.49449	0.41214	12.3642		0.14444	9.396	5.9881	10.2689	8.55099	1.22279	36.6838
		0.21666	0.28795	0.60835	0.58473	0.493677	14.8103		0.21666	10.5696	7.1511	11.0607	9.59381	1.37191	41.1574
		0.28888	0.49535	0.56217	0.84484	0.63412	19.0236		0.28888	12.0189	9.0999	12.3843	11.1677	1.59698	47.9094
		0.3611	0.49614	0.69553	0.74195	0.64454	19.3362		0.3611	12.8734	10.7155	13.0133	12.2007	1.74471	52.3412
		0.43332	0.59023	0.74332	0.64426	0.65927	19.7781		0.43332	13.6335	11.9035	13.3435	12.9602	1.8533	55.5991
		0.50554	0.56674	0.60731	0.73738	0.637143	19.1143		0.50554	14.1149	12.9373	13.7028	13.585	1.94265	58.2796
		0.57776	0.67796	0.62231	0.73054	0.676937	20.3081		0.57776	15.2692	13.6782	14.0302	14.3259	2.0486	61.458
		0.64998	1.14756	0.63503	0.75225	0.844947	25.3484		0.64998	15.3809	13.9611	13.6658	14.3359	2.05004	61.5012
		0.7222	1.48083	0.82588	1.16605	1.15759	34.7276		0.7222	15.1208	14.0898	13.738	14.3162	2.04722	61.4165
		0.79443	1.6388	1.25736	1.59881	1.49832	44.9497		0.79443	13.4509	13.7103	12.8607	13.3406	1.90771	57.2313
		0.86665	1.63145	1.52762	1.68872	1.61593	48.4779		0.86665	11.3931	12.8362	11.6187	11.9493	1.70875	51.2626
		0.93887	1.45753	1.67841	1.5254	1.55378	46.6134		0.93887	10.0093	12.0791	10.0377	10.7087	1.53134	45.9403
		1.01109	1.2599	1.46448	1.0296	1.25133	37.5398		1.01109	8.0064	10.3429	8.56423	8.97118	1.28288	38.4863
		1.08331	0.83537	1.12363	0.83162	0.930207	27.9062		1.08331	6.9903	8.6009	7.3528	7.648	1.09366	32.8099
		1.15553	0.73641	1.01061	0.7049	0.817307	24.5192		1.15553	6.6632	7.6063	7.19066	7.15339	1.02293	30.688
		1.22775	0.62744	0.81869	0.8029	0.749677	22.4903		1.22775	6.3674	6.8878	6.64782	6.63434	0.948711	28.4613
		1.29997	0.70115	0.66321	0.81405	0.726137	21.7841		1.29997	6.2755	5.9512	6.38938	6.20536	0.887366	26.621
		1.37219	0.80526	0.70599	0.68469	0.73198	21.9594		1.37219	6.1915	5.8554	6.82454	6.29048	0.899539	26.9862
		1.44441	0.87163	0.68728	0.69264	0.750517	22.5155		1.44441	6.3972	5.6489	6.47873	6.17494	0.883017	26.4905
		1.51663	0.91128	0.62092	0.61793	0.71671	21.5013		1.51663	6.8211	6.2052	6.93861	6.65497	0.951661	28.5498
		1.58885	1.12101	0.6651	0.96713	0.917747	27.5324		1.58885	8.0672	7.1473	8.01244	7.74231	1.10715	33.2145
		1.66107	1.04685	0.98168	0.9939	1.00748	30.2243		1.66107	9.74	8.5664	8.81715	9.04118	1.29289	38.7867
		1.73329	1.27068	1.22861	0.98681	1.16203	34.861		1.73329	12.1336	10.2994	10.6078	11.0136	1.57494	47.2483
		1.80551	1.43199	1.39712	1.3197	1.38294	41.4881		1.80551	13.3518	12.6017	12.0017	12.6517	1.8092	54.2759
		1.87773	1.38965	1.43397	1.4732	1.43227	42.9682		1.87773	14.3612	13.7823	13.4194	13.8543	1.98116	59.4349
		1.94995	0.97178	1.0699	1.39666	1.14611	34.3834		1.94995	15.1528	14.7544	13.7097	14.539	2.07907	62.3722
		2.02217	0.87975	0.84061	1.15403	0.95813	28.7439		2.02217	14.8037	14.6935	14.0194	14.5055	2.07429	62.2287
		2.09439	0.78076	0.59246	0.85317	0.74213	22.2639		2.09439	14.2524	13.9036	14.4582	14.2047	2.03128	60.9383
		2.16661	0.75313	0.72913	0.75254	0.744933	22.348		2.16661	13.2766	13.5812	14.6112	13.823	1.97669	59.3006
		2.23884	0.61031	0.84638	0.76544	0.74071	22.2213		2.23884	11.9332	11.8387	14.218	12.6633	1.81085	54.3256
		2.31106	0.63479	0.64566	0.79474	0.69173	20.7519		2.31106	10.1943	10.0659	13.4345	11.2316	1.60611	48.1834
		2.38328	0.52117	0.60666	0.87741	0.668413	20.0524		2.38328	8.5153	9.0386	11.4647	9.67288	1.38322	41.4967
		2.4555	0.44984	0.63984	0.80006	0.629913	18.8974		2.4555	7.0838	8.371	10.1009	8.51856	1.21815	36.5446
		2.52772	0.5202	0.53415	0.85742	0.637257	19.1177		2.52772	5.5996	6.5361	8.42348	6.85306	0.979988	29.3996
		2.59994	0.69792	0.37886	0.80242	0.6264	18.792		2.59994	4.9983	5.3126	6.74128	5.68406	0.812821	24.3846
		2.67216	0.63898	0.48921	0.64055	0.58958	17.6874		2.67216	4.0361	4.15	5.98608	4.72406	0.675541	20.2662
		2.74438	0.59235	0.38739	0.66421	0.547983	16.4395		2.74438	4.005	3.7707	5.48074	4.41881	0.63189	18.9567
