# Supplementary material for: A polarity pathway for exocyst-dependent intracellular tube extension
Source: eLife journal article supplement (doi:10.7554/elife.65169), 2021-03-09
Supplement: supp [file elife-65169-supp-v1.zip › elife_poa_e65169_Figure_5_source_data_1.xlsx]

## Sheet: Figure 5D - source data 
		Figure 5D - source data. Fluorescent intensity values for line trace measurements of PAR-6::ZF1::YFP; mCherry::SEC-10 (control)
		par-6(xn60); xnis485[mCherry::sec-10]; xnEx511[t28h11.8p::cfp, pRF4] control replicate3 061420
		image004
		red channel (mCh-sec-10)	measurements				multiply to fit to y-axis		yellow channel (par-6-zf1-yfp)	measurements					multiply to fit to y-axis
		distance (microns)	m1	m2	m3	avg	*23		distance (microns)	m1	m2	m3	avg	normalized to red channel	*23
		0	0.99582	0.83605	1.34251	1.05813	24.3369		0	0.00365	0.04753	0	0.01706	0.032414	0.745522
		0.06602	0.93454	0.90234	1.32928	1.05539	24.2739		0.06602	0.02965	0.041	0.02169	0.03078	0.058482	1.34509
		0.13204	0.75818	0.96084	1.35329	1.0241	23.5544		0.13204	0.00454	0.05874	0.04647	0.0365833	0.0695083	1.59869
		0.19806	0.83662	0.88244	1.31766	1.01224	23.2815		0.19806	0.06619	0.04517	0.12366	0.07834	0.148846	3.42346
		0.26408	1.01137	0.9361	1.48079	1.14275	26.2833		0.26408	0.11678	0.00422	0.07025	0.06375	0.121125	2.78587
		0.3301	1.24714	0.93799	1.62053	1.26855	29.1767		0.3301	0.15758	0.04165	0.19023	0.12982	0.246658	5.67313
		0.39611	1.10929	1.217	1.57831	1.30153	29.9353		0.39611	0.18243	0.15562	0.26978	0.20261	0.384959	8.85406
		0.46213	1.19106	1.18634	1.66947	1.34896	31.026		0.46213	0.25951	0.28707	0.32806	0.291547	0.553939	12.7406
		0.52815	1.31429	1.40155	1.89637	1.5374	35.3603		0.52815	0.36775	0.4446	0.47485	0.429067	0.815227	18.7502
		0.59417	1.37499	1.62893	1.90236	1.63543	37.6148		0.59417	0.52094	1.05232	0.43794	0.6704	1.27376	29.2965
		0.66019	1.51086	1.96963	1.83117	1.77055	40.7227		0.66019	0.88967	1.30228	0.72781	0.973253	1.84918	42.5312
		0.72621	1.91878	2.30597	1.80806	2.01094	46.2515		0.72621	1.06547	1.57222	0.96281	1.20017	2.28032	52.4473
		0.79223	2.33014	2.73927	2.06944	2.37962	54.7312		0.79223	1.41951	1.97978	1.09306	1.49745	2.84515	65.4386
		0.85825	2.92111	2.87798	2.32953	2.70954	62.3194		0.85825	1.78324	2.27016	1.47993	1.84444	3.50444	80.6022
		0.92427	2.85065	2.99212	2.90509	2.91595	67.0669		0.92427	2.01505	2.21302	1.92611	2.05139	3.89765	89.6459
		0.99029	3.0213	2.72984	3.02715	2.9261	67.3002		0.99029	1.76699	1.76458	2.08933	1.87363	3.5599	81.8778
		1.05631	2.4331	2.34883	2.96814	2.58336	59.4172		1.05631	1.69239	1.62098	1.66248	1.65862	3.15137	72.4815
		1.12232	2.36754	1.79895	2.6412	2.26923	52.1923		1.12232	1.4952	1.18946	1.55163	1.4121	2.68298	61.7086
		1.18834	1.70906	1.63761	2.38349	1.91005	43.9312		1.18834	1.17373	1.10188	1.13824	1.13795	2.1621	49.7284
		1.25436	1.50554	1.45811	2.21856	1.7274	39.7303		1.25436	0.7993	0.90098	0.91451	0.871597	1.65603	38.0888
		1.32038	1.26171	1.17811	1.83186	1.42389	32.7495		1.32038	0.67167	0.85575	0.76801	0.765143	1.45377	33.4368
		1.3864	1.02976	1.30856	1.5563	1.29821	29.8588		1.3864	0.78151	0.70412	0.48144	0.65569	1.24581	28.6537
		1.45242	1.08777	1.13426	1.586	1.26934	29.1949		1.45242	0.80092	0.77419	0.4693	0.68147	1.29479	29.7802
		1.51844	1.47504	1.07451	1.72022	1.42326	32.7349		1.51844	0.73723	0.78123	0.45606	0.658173	1.25053	28.7622
		1.58446	1.31298	1.36375	1.76303	1.47992	34.0382		1.58446	0.74327	0.78469	0.67169	0.733217	1.39311	32.0416
		1.65048	1.33576	1.426	1.826	1.52925	35.1728		1.65048	0.91703	0.94212	0.98957	0.949573	1.80419	41.4964
		1.7165	1.61993	1.57211	2.0649	1.75231	40.3032		1.7165	1.14194	1.20742	1.2609	1.20342	2.2865	52.5895
		1.78252	2.18068	2.1026	2.52684	2.27004	52.2109		1.78252	1.73821	1.80734	1.72601	1.75719	3.33865	76.7891
		1.84853	2.90758	2.46083	2.79421	2.72087	62.5801		1.84853	2.11807	1.84185	1.86848	1.9428	3.69132	84.9004
		1.91455	3.4752	2.71761	3.10469	3.09917	71.2808		1.91455	1.8983	1.87939	2.02403	1.93391	3.67442	84.5117
		1.98057	3.5234	2.7068	2.80439	3.01153	69.2652		1.98057	2.13755	1.83435	1.63497	1.86896	3.55102	81.6734
		2.04659	3.17593	2.84596	2.34269	2.78819	64.1284		2.04659	1.93923	1.43228	1.26263	1.54471	2.93496	67.504
		2.11261	2.67596	2.67204	2.20545	2.51782	57.9098		2.11261	1.37305	0.85573	0.92502	1.05127	1.99741	45.9404
		2.17863	2.52969	2.36259	1.86001	2.25076	51.7676		2.17863	0.98844	0.71598	0.67977	0.79473	1.50999	34.7297
		2.24465	2.31832	1.93016	2.06954	2.10601	48.4382		2.24465	0.6801	0.53327	0.50855	0.573973	1.09055	25.0826
		2.31067	2.08947	1.68415	1.97169	1.9151	44.0474		2.31067	0.47746	0.43217	0.45242	0.454017	0.862632	19.8405
		2.37669	1.82369	1.56258	1.98142	1.78923	41.1523		2.37669	0.34562	0.2992	0.33215	0.325657	0.618748	14.2312
		2.44271	1.6911	1.32705	1.726	1.58138	36.3718		2.44271	0.21666	0.27024	0.24145	0.242783	0.461288	10.6096
		2.50873	1.22624	1.34848	1.96795	1.51422	34.8271		2.50873	0.16807	0.17638	0.20091	0.181787	0.345395	7.94408
		2.57474	1.18736	1.20647	1.68897	1.36093	31.3015		2.57474	0.13775	0.13047	0.13369	0.13397	0.254543	5.85449
		2.64076	1.1766	1.23368	1.67243	1.3609	31.3008		2.64076	0.03741	0.17522	0.09696	0.103197	0.196074	4.50969
		2.70678	1.26886	1.12317	1.56165	1.31789	30.3115		2.70678	0.00786	0.11896	0.09321	0.0733433	0.139352	3.2051
		2.7728	1.14882	0.95124	1.40654	1.16887	26.8839		2.7728	0	0.06323	0.06926	0.0441633	0.0839103	1.92994
		image007
		red channel (mCh-sec-10)	measurements				multiply to fit to y-axis		yellow channel (par-6-zf1-yfp)	measurements					multiply to fit to y-axis
		distance (microns)	m1	m2	m3		*23		distance (microns)	m1	m2	m3		normalized to red channel	*23
		0	1.37245	2.23829	1.01697	1.54257	35.4791		0	0.22706	0.14854	0.03935	0.138317	0.262802	6.04444
		0.06602	1.29413	2.10033	1.17121	1.52189	35.0035		0.06602	0.23179	0.2282	0.05028	0.17009	0.323171	7.43293
		0.13204	1.35617	1.96418	1.2791	1.53315	35.2625		0.13204	0.20149	0.16156	0.09853	0.15386	0.292334	6.72368
		0.19806	1.32732	1.81018	1.31001	1.4825	34.0976		0.19806	0.30675	0.20859	0.13682	0.217387	0.413035	9.4998
		0.26408	1.33946	2.00758	1.26711	1.53805	35.3751		0.26408	0.31941	0.28101	0.15518	0.251867	0.478547	11.0066
		0.3301	1.33563	1.87933	1.65844	1.62447	37.3627		0.3301	0.2049	0.22393	0.2344	0.221077	0.420046	9.66105
		0.39611	1.26671	1.89558	1.54737	1.56989	36.1074		0.39611	0.43986	0.42793	0.4195	0.429097	0.815284	18.7515
		0.46213	1.74799	2.02717	1.76162	1.84559	42.4486		0.46213	0.74027	0.34165	0.58031	0.554077	1.05275	24.2132
		0.52815	1.72577	2.07485	2.13445	1.97836	45.5022		0.52815	0.9268	0.58062	0.86938	0.792267	1.50531	34.6221
		0.59417	1.79089	2.2236	2.50767	2.17405	50.0032		0.59417	0.94685	0.86513	1.01776	0.943247	1.79217	41.2199
		0.66019	2.30164	2.4174	3.01195	2.577	59.2709		0.66019	1.08923	1.27272	1.17713	1.17969	2.24142	51.5526
		0.72621	2.99099	2.68748	3.26162	2.98003	68.5407		0.72621	1.48007	1.71718	1.52211	1.57312	2.98893	68.7453
		0.79223	3.06767	3.56559	3.37339	3.33555	76.7177		0.79223	1.94347	2.16502	1.90226	2.00358	3.80681	87.5566
		0.85825	3.42037	3.70517	3.50114	3.54223	81.4712		0.85825	2.26298	2.11267	1.76441	2.04669	3.8887	89.4402
		0.92427	3.40776	3.53495	3.22727	3.38999	77.9698		0.92427	1.92479	1.96167	1.46989	1.78545	3.39235	78.0242
		0.99029	2.98066	2.92871	2.65704	2.85547	65.6758		0.99029	1.59246	1.39211	1.07592	1.3535	2.57164	59.1478
		1.05631	2.50138	2.41107	2.23817	2.38354	54.8214		1.05631	1.23968	0.95628	0.79581	0.997257	1.89479	43.5801
		1.12232	2.27005	1.81803	1.88385	1.99064	45.7848		1.12232	0.84959	0.7054	0.83643	0.79714	1.51457	34.835
		1.18834	1.77185	1.55766	1.48408	1.60453	36.9042		1.18834	0.81778	0.51162	0.32828	0.55256	1.04986	24.1469
		1.25436	1.47833	1.23586	1.29794	1.33738	30.7597		1.25436	0.46426	0.41887	0.3163	0.39981	0.759639	17.4717
		1.32038	1.15966	1.24333	1.32871	1.2439	28.6097		1.32038	0.25909	0.37219	0.42531	0.352197	0.669174	15.391
		1.3864	1.33915	1.00494	1.23532	1.19314	27.4421		1.3864	0.4466	0.42141	0.38704	0.41835	0.794865	18.2819
		1.45242	1.03046	0.98723	1.38006	1.13258	26.0494		1.45242	0.28453	0.33586	0.4639	0.36143	0.686717	15.7945
		1.51844	1.13225	1.30646	1.55354	1.33075	30.6072		1.51844	0.28178	0.24587	0.37501	0.300887	0.571685	13.1487
		1.58446	1.23951	1.18815	1.44879	1.29215	29.7195		1.58446	0.5329	0.47033	0.48568	0.496303	0.942976	21.6885
		1.65048	1.13249	1.44147	1.59536	1.38977	31.9648		1.65048	0.59919	0.45555	0.45671	0.503817	0.957252	22.0168
		1.7165	1.37215	1.63473	2.00614	1.67101	38.4332		1.7165	0.74827	0.49327	0.86302	0.70152	1.33289	30.6564
		1.78252	1.81017	1.49552	2.39845	1.90138	43.7317		1.78252	1.02455	0.64307	0.9408	0.869473	1.652	37.996
		1.84853	2.12425	1.44914	2.69602	2.0898	48.0655		1.84853	1.21958	0.69569	1.42782	1.11436	2.11729	48.6977
		1.91455	2.61157	1.73635	2.77949	2.3758	54.6435		1.91455	1.6703	0.89693	1.545	1.37074	2.60441	59.9015
		1.98057	3.05437	2.3256	3.27134	2.88377	66.3267		1.98057	1.93398	1.38541	1.31225	1.54388	2.93337	67.4676
		2.04659	3.12117	2.85779	3.34565	3.1082	71.4887		2.04659	1.9334	1.8868	1.55304	1.79108	3.40305	78.2702
		2.11261	3.32433	3.29747	2.97064	3.19748	73.542		2.11261	1.89632	1.82131	1.08575	1.60113	3.04214	69.9692
		2.17863	2.97251	3.12371	2.57695	2.89106	66.4943		2.17863	1.38056	1.69451	1.06445	1.37984	2.6217	60.299
		2.24465	2.85608	2.79616	2.4263	2.69285	61.9355		2.24465	0.85876	1.36923	0.7763	1.00143	1.90272	43.7625
		2.31067	2.51566	2.71538	2.42025	2.55043	58.6599		2.31067	0.62996	0.90809	0.78309	0.773713	1.47006	33.8113
		2.37669	2.04892	2.25967	2.29224	2.20028	50.6064		2.37669	0.59543	0.64741	0.38301	0.54195	1.02971	23.6832
		2.44271	1.61543	2.07243	2.02823	1.90536	43.8234		2.44271	0.38242	0.625	0.43241	0.479943	0.911892	20.9735
		2.50873	1.61364	2.29317	1.70859	1.8718	43.0514		2.50873	0.27963	0.58858	0.45507	0.441093	0.838077	19.2758
		2.57474	1.57504	2.19027	1.6518	1.8057	41.5312		2.57474	0.17489	0.44378	0.32841	0.315693	0.599817	13.7958
		2.64076	1.37867	1.73874	1.32089	1.47943	34.027		2.64076	0.05769	0.365	0.17588	0.199523	0.379094	8.71917
		2.70678	1.62349	1.54321	1.57381	1.58017	36.3439		2.70678	0.07346	0.33816	0.09786	0.169827	0.322671	7.42143
		2.7728	1.48755	1.17492	1.64882	1.4371	33.0532		2.7728	0.10499	0.13621	0.0757	0.105633	0.200703	4.61618
		image011
		red channel (mCh-sec-10)	measurements				multiply to fit to y-axis		yellow channel (par-6-zf1-yfp)	measurements					multiply to fit to y-axis
		distance (microns)	m1	m2	m3		*23		distance (microns)	m1	m2	m3	avg	normalized to red channel	*23
		0	1.9999	1.70936	1.13017	1.61314	37.1023		0	0.27697	0.12812	0.04315	0.149413	0.283885	6.52936
		0.06602	1.88623	1.61195	1.41083	1.63634	37.6357		0.06602	0.29631	0.11088	0.08106	0.16275	0.309225	7.11218
		0.13204	1.91703	1.74003	1.33445	1.66384	38.2682		0.13204	0.24835	0.15138	0.02509	0.141607	0.269053	6.18821
		0.19806	1.77845	1.65262	1.40769	1.61292	37.0972		0.19806	0.33451	0.16476	0.12797	0.20908	0.397252	9.1368
		0.26408	1.96611	1.60321	1.40733	1.65888	38.1543		0.26408	0.32413	0.19278	0.24227	0.25306	0.480814	11.0587
		0.3301	1.98027	1.56539	1.58194	1.7092	39.3116		0.3301	0.37901	0.36423	0.17806	0.3071	0.58349	13.4203
		0.39611	2.1232	1.73805	1.64772	1.83632	42.2354		0.39611	0.46988	0.47092	0.26511	0.40197	0.763743	17.5661
		0.46213	2.19125	1.77271	1.76833	1.91076	43.9476		0.46213	0.58363	0.56918	0.27509	0.475967	0.904337	20.7997
		0.52815	2.24104	2.02219	1.97011	2.07778	47.7889		0.52815	0.66072	0.75696	0.29177	0.569817	1.08265	24.901
		0.59417	2.46994	2.59589	1.80118	2.289	52.6471		0.59417	0.8043	0.66237	0.47338	0.646683	1.2287	28.2601
		0.66019	2.75233	2.50219	1.59847	2.28433	52.5396		0.66019	1.11048	0.63042	0.39954	0.71348	1.35561	31.1791
		0.72621	3.37732	3.00259	2.00547	2.79513	64.2879		0.72621	1.50184	0.90021	0.37043	0.92416	1.7559	40.3858
		0.79223	3.65278	3.055	2.1168	2.94153	67.6551		0.79223	1.47434	1.2186	0.67965	1.1242	2.13597	49.1274
		0.85825	3.70591	3.39765	2.61729	3.24028	74.5265		0.85825	1.66245	1.24412	0.92434	1.27697	2.42624	55.8036
		0.92427	3.64367	3.57823	2.91232	3.37807	77.6957		0.92427	1.87099	1.30942	1.16925	1.44989	2.75478	63.36
		0.99029	3.18686	3.04477	2.93309	3.05491	70.2629		0.99029	1.95507	1.34494	1.32569	1.5419	2.92961	67.381
		1.05631	2.71613	2.78954	2.57159	2.69242	61.9257		1.05631	1.46156	1.00923	1.12907	1.19995	2.27991	52.438
		1.12232	2.33577	2.27077	2.18619	2.26424	52.0776		1.12232	1.16964	1.15472	0.80457	1.04298	1.98166	45.5781
		1.18834	2.00744	2.13141	1.99834	2.04573	47.0518		1.18834	0.85631	0.88663	0.66334	0.802093	1.52398	35.0515
		1.25436	2.1187	1.85765	1.61768	1.86468	42.8876		1.25436	0.93793	0.71704	0.63604	0.76367	1.45097	33.3724
		1.32038	1.978	1.72629	1.53593	1.74674	40.175		1.32038	0.76004	0.67344	0.60618	0.679887	1.29178	29.711
		1.3864	2.03387	1.95457	1.68891	1.89245	43.5264		1.3864	0.73448	0.98292	0.37895	0.698783	1.32769	30.5368
		1.45242	2.02853	2.11847	1.74996	1.96565	45.21		1.45242	0.86739	1.1343	0.59539	0.865693	1.64482	37.8308
		1.51844	2.29174	2.40735	1.8682	2.1891	50.3492		1.51844	0.90687	1.14892	0.59994	0.885243	1.68196	38.6851
		1.58446	2.80164	2.55161	1.99847	2.45057	56.3632		1.58446	1.18459	1.27153	0.62926	1.02846	1.95407	44.9437
		1.65048	2.97085	2.57815	2.33812	2.62904	60.4679		1.65048	1.11093	1.2617	0.81119	1.06127	2.01642	46.3776
		1.7165	3.37959	3.27985	2.67735	3.11226	71.5821		1.7165	1.33862	1.46281	1.41421	1.40521	2.66991	61.4078
		1.78252	3.86167	3.46183	3.01387	3.44579	79.2532		1.78252	1.47874	1.49767	1.51762	1.49801	2.84622	65.463
		1.84853	3.84461	3.10038	3.07986	3.34162	76.8572		1.84853	1.76851	1.16719	1.58802	1.50791	2.86502	65.8955
		1.91455	3.78178	2.64985	2.90068	3.11077	71.5477		1.91455	1.58827	1.10172	1.45832	1.38277	2.62726	60.427
		1.98057	3.17474	2.57857	2.51291	2.75541	63.3744		1.98057	1.34196	0.73567	1.14085	1.07283	2.03837	46.8825
		2.04659	3.24929	2.29522	2.02659	2.5237	58.0451		2.04659	0.86446	0.46007	0.95126	0.758597	1.44133	33.1507
		2.11261	2.52922	1.81538	2.2169	2.18717	50.3048		2.11261	0.55148	0.37269	0.76871	0.564293	1.07216	24.6596
		2.17863	2.60326	1.78795	2.22913	2.20678	50.7559		2.17863	0.50492	0.36483	0.52254	0.464097	0.881784	20.281
		2.24465	2.47421	1.97401	2.02501	2.15774	49.6281		2.24465	0.66175	0.27435	0.5051	0.4804	0.91276	20.9935
		2.31067	2.00302	2.05575	2.18145	2.08007	47.8417		2.31067	0.53347	0.26214	0.45332	0.41631	0.790989	18.1927
		2.37669	2.10776	1.85405	1.98573	1.98251	45.5978		2.37669	0.52832	0.16067	0.35045	0.34648	0.658312	15.1412
		2.44271	2.10487	1.57149	2.22135	1.9659	45.2158		2.44271	0.4711	0.12322	0.20558	0.266633	0.506603	11.6519
		2.50873	2.12468	1.7006	2.47694	2.10074	48.317		2.50873	0.37781	0.07771	0.19821	0.21791	0.414029	9.52267
		2.57474	2.27765	1.65372	2.49902	2.14346	49.2997		2.57474	0.21401	0.14138	0.2417	0.19903	0.378157	8.69761
		2.64076	2.23539	1.56635	2.53767	2.11314	48.6021		2.64076	0.15454	0.09282	0.18002	0.14246	0.270674	6.2255
		2.70678	2.22031	1.63487	2.4207	2.09196	48.1151		2.70678	0.38481	0.03334	0.16705	0.195067	0.370627	8.52441
		2.7728	2.30239	1.69103	2.24459	2.07934	47.8247		2.7728	0.4006	0.13281	0.14187	0.225093	0.427677	9.83658
		image013
		red channel (mCh-sec-10)	measurements				multiply to fit to y-axis		yellow channel (par-6-zf1-yfp)	measurements					multiply to fit to y-axis
		distance (microns)	m1	m2	m3		*23		distance (microns)	m1	m2	m3		normalized to red channel	*23
		0	1.81905	1.66438	2.19096	1.89146	43.5037		0	0.42936	0.15839	0.24722	0.278323	0.528814	12.1627
		0.06602	1.85557	1.6116	2.14665	1.87127	43.0393		0.06602	0.48496	0.19232	0.19566	0.29098	0.552862	12.7158
		0.13204	1.85969	1.72484	2.34746	1.97733	45.4786		0.13204	0.30287	0.20209	0.27759	0.26085	0.495615	11.3991
		0.19806	1.90382	1.51807	2.19484	1.87224	43.0616		0.19806	0.30098	0.22731	0.26419	0.26416	0.501904	11.5438
		0.26408	2.04191	1.60241	2.09013	1.91148	43.9641		0.26408	0.32265	0.25381	0.20725	0.261237	0.49635	11.416
		0.3301	2.09267	1.62283	1.95931	1.8916	43.5069		0.3301	0.3379	0.30408	0.22327	0.288417	0.547992	12.6038
		0.39611	2.17098	1.66409	2.14286	1.99264	45.8308		0.39611	0.44298	0.2764	0.27128	0.33022	0.627418	14.4306
		0.46213	2.0792	1.87092	2.24014	2.06342	47.4587		0.46213	0.47904	0.42924	0.29987	0.402717	0.765162	17.5987
		0.52815	2.39582	2.10279	2.23469	2.24443	51.622		0.52815	0.59232	0.47945	0.35569	0.47582	0.904058	20.7933
		0.59417	2.57339	2.07001	2.63822	2.42721	55.8258		0.59417	0.81421	0.48626	0.59678	0.632417	1.20159	27.6366
		0.66019	2.7976	1.91849	2.99218	2.56942	59.0967		0.66019	0.97891	0.77889	0.64032	0.799373	1.51881	34.9326
		0.72621	2.82009	2.42432	3.36463	2.86968	66.0026		0.72621	0.89905	0.83784	0.66267	0.799853	1.51972	34.9536
		0.79223	2.93486	2.54202	3.93323	3.1367	72.1442		0.79223	0.8553	1.09931	0.97601	0.976873	1.85606	42.6894
		0.85825	2.68257	2.72574	4.04948	3.1526	72.5097		0.85825	1.14724	1.38149	1.52028	1.34967	2.56437	58.9806
		0.92427	2.66315	2.96825	4.19684	3.27608	75.3498		0.92427	1.18554	1.49582	1.45781	1.37972	2.62147	60.2939
		0.99029	2.5694	2.94818	3.70334	3.07364	70.6937		0.99029	1.13079	1.60139	1.23596	1.32271	2.51316	57.8026
		1.05631	2.26926	3.19744	3.09621	2.8543	65.649		1.05631	0.87922	1.23696	1.39567	1.17062	2.22417	51.1559
		1.12232	1.70356	2.84208	2.97148	2.50571	57.6313		1.12232	0.65944	0.90242	1.05358	0.871813	1.65645	38.0982
		1.18834	1.32516	1.95776	2.99153	2.09148	48.1041		1.18834	0.44702	0.83943	0.70611	0.664187	1.26195	29.025
		1.25436	1.103	1.72242	2.55685	1.79409	41.2641		1.25436	0.41104	0.90085	0.64717	0.65302	1.24074	28.537
		1.32038	1.00104	1.72447	2.37455	1.70002	39.1005		1.32038	0.33034	0.64282	0.64909	0.54075	1.02742	23.6308
		1.3864	1.16019	1.65392	2.34769	1.7206	39.5738		1.3864	0.39805	0.665	0.60589	0.556313	1.057	24.3109
		1.45242	1.17833	1.71254	2.23653	1.70913	39.3101		1.45242	0.2646	0.60109	0.67365	0.513113	0.974915	22.4231
		1.51844	1.31282	1.82114	2.41013	1.84803	42.5047		1.51844	0.41085	0.74668	0.76079	0.63944	1.21494	27.9435
		1.58446	1.33239	1.85705	2.64099	1.94348	44.7		1.58446	0.60224	0.89352	0.86378	0.786513	1.49438	34.3706
		1.65048	1.71496	2.23832	2.75638	2.23655	51.4407		1.65048	0.67358	0.83238	1.03168	0.84588	1.60717	36.965
		1.7165	1.96993	2.49943	3.38373	2.6177	60.207		1.7165	0.6587	1.16237	1.14366	0.988243	1.87766	43.1862
		1.78252	2.02547	2.66789	3.58969	2.76102	63.5034		1.78252	0.90343	1.4172	1.29114	1.20392	2.28745	52.6114
		1.84853	2.72797	2.8794	3.74926	3.11888	71.7342		1.84853	0.94585	1.552	1.15274	1.21686	2.31204	53.1769
		1.91455	2.92611	3.30772	3.42566	3.21983	74.0561		1.91455	1.30708	1.42436	1.19273	1.30806	2.48531	57.1621
		1.98057	3.11099	3.38586	3.11202	3.20296	73.668		1.98057	1.39678	1.40385	0.83701	1.21255	2.30384	52.9883
		2.04659	3.24932	3.12869	2.95137	3.10979	71.5252		2.04659	1.27143	0.98438	0.61877	0.958193	1.82057	41.873
		2.11261	3.05552	3.02874	2.53274	2.87233	66.0637		2.11261	0.99981	0.61417	0.54627	0.720083	1.36816	31.4676
		2.17863	2.80865	2.82743	2.15344	2.59651	59.7197		2.17863	0.79887	0.48496	0.34642	0.543417	1.03249	23.7473
		2.24465	2.46728	2.62577	1.99653	2.36319	54.3534		2.24465	0.78923	0.4925	0.31741	0.533047	1.01279	23.2941
		2.31067	2.23786	2.37248	2.06355	2.22463	51.1665		2.31067	0.4247	0.38458	0.30213	0.37047	0.703893	16.1895
		2.37669	1.89364	2.35264	2.16896	2.13841	49.1835		2.37669	0.51189	0.38334	0.46524	0.45349	0.861631	19.8175
		2.44271	2.18958	2.30132	1.8519	2.11427	48.6281		2.44271	0.45803	0.33003	0.37853	0.388863	0.73884	16.9933
		2.50873	2.01658	2.20878	1.97335	2.06624	47.5234		2.50873	0.21545	0.30486	0.21994	0.24675	0.468825	10.783
		2.57474	1.76712	1.96232	1.99081	1.90675	43.8552		2.57474	0.18616	0.25511	0.24794	0.229737	0.4365	10.0395
		2.64076	1.69737	1.99283	1.78061	1.8236	41.9429		2.64076	0.15067	0.40751	0.24495	0.26771	0.508649	11.6989
		2.70678	1.77951	1.89968	1.84786	1.84235	42.374		2.70678	0.10102	0.23037	0.15436	0.161917	0.307642	7.07576
		2.7728	1.92793	1.98714	1.83744	1.9175	44.1026		2.7728	0.18058	0.44265	0.16912	0.264117	0.501822	11.5419
		image006
		red channel (mCh-sec-10)	measurements				multiply to fit to y-axis		yellow channel (par-6-zf1-yfp)	measurements					multiply to fit to y-axis
		distance (microns)	m1	m2	m3		*23		distance (microns)	m1	m2	m3		normalized to red channel	*23
		0	0.49647	0.65546	0.29929	0.48374	11.126		0	0	0.04992	0	0.01664	0.031616	0.727168
		0.06602	0.52332	0.86004	0.2397	0.54102	12.4435		0.06602	0	0.03969	0	0.01323	0.025137	0.578151
		0.13204	0.58665	1.01909	0.50958	0.705107	16.2175		0.13204	0	0.05314	0	0.0177133	0.0336553	0.774073
		0.19806	0.64552	1.25087	0.52976	0.808717	18.6005		0.19806	0	0.08469	0	0.02823	0.053637	1.23365
		0.26408	0.74717	1.37837	0.62753	0.91769	21.1069		0.26408	0	0.08765	0.00793	0.03186	0.060534	1.39228
		0.3301	0.70095	1.3533	0.6583	0.904183	20.7962		0.3301	0.07078	0.23926	0.02912	0.113053	0.214801	4.94043
		0.39611	0.7	1.52299	0.90826	1.04375	24.0062		0.39611	0.13653	0.23388	0.1334	0.167937	0.31908	7.33883
		0.46213	0.91015	1.543	1.11152	1.18822	27.3291		0.46213	0.08191	0.26739	0.16503	0.171443	0.325742	7.49207
		0.52815	1.14865	1.51366	1.3005	1.32094	30.3815		0.52815	0.15624	0.40466	0.2275	0.2628	0.49932	11.4844
		0.59417	1.28317	1.63766	1.33474	1.41852	32.626		0.59417	0.42501	0.43321	0.3274	0.395207	0.750893	17.2705
		0.66019	1.38414	1.86906	1.63702	1.63007	37.4917		0.66019	0.53934	0.51131	0.33914	0.463263	0.8802	20.2446
		0.72621	1.77724	2.15135	2.25516	2.06125	47.4087		0.72621	0.70098	0.68892	0.69137	0.693757	1.31814	30.3172
		0.79223	2.65928	2.54783	2.91795	2.70835	62.2921		0.79223	1.03356	0.77706	1.01845	0.943023	1.79174	41.2101
		0.85825	2.75221	2.7628	3.05892	2.85798	65.7335		0.85825	1.34608	0.96439	1.55343	1.28797	2.44714	56.2841
		0.92427	2.95256	2.78299	2.98092	2.90549	66.8263		0.92427	1.68796	1.16678	1.8754	1.57671	2.99576	68.9024
		0.99029	2.67052	2.35234	2.55081	2.52456	58.0648		0.99029	1.32593	1.16298	1.35796	1.28229	2.43635	56.0361
		1.05631	1.87495	2.26521	2.01318	2.05111	47.1756		1.05631	1.02815	0.91156	0.81112	0.916943	1.74219	40.0704
		1.12232	1.53836	1.94158	1.86613	1.78202	40.9865		1.12232	0.70452	0.83605	0.53683	0.692467	1.31569	30.2608
		1.18834	1.33248	1.62939	1.41998	1.46062	33.5942		1.18834	0.52693	0.46522	0.48839	0.493513	0.937675	21.5665
		1.25436	1.22308	1.48636	1.26564	1.32503	30.4756		1.25436	0.54922	0.25248	0.34571	0.38247	0.726693	16.7139
		1.32038	1.16615	1.30769	1.03943	1.17109	26.9351		1.32038	0.52723	0.2555	0.27921	0.35398	0.672562	15.4689
		1.3864	1.20178	1.34592	0.92129	1.15633	26.5956		1.3864	0.57546	0.29642	0.20642	0.359433	0.682923	15.7072
		1.45242	1.00326	1.45624	0.96163	1.14038	26.2287		1.45242	0.50154	0.27288	0.31315	0.362523	0.688794	15.8423
		1.51844	1.29781	1.363	0.88787	1.18289	27.2065		1.51844	0.47661	0.30936	0.27879	0.35492	0.674348	15.51
		1.58446	1.46877	1.52799	1.32461	1.44046	33.1305		1.58446	0.62425	0.56273	0.37665	0.52121	0.990299	22.7769
		1.65048	1.96903	1.74335	1.40921	1.7072	39.2655		1.65048	0.94686	0.62251	0.38853	0.652633	1.24	28.5201
		1.7165	2.22349	1.81978	1.55657	1.86661	42.9321		1.7165	0.97525	0.72996	0.7624	0.822537	1.56282	35.9449
		1.78252	2.62911	2.25648	1.82176	2.23578	51.423		1.78252	1.19411	1.08804	0.97857	1.08691	2.06512	47.4978
		1.84853	2.97569	2.22617	2.29667	2.49951	57.4887		1.84853	1.60437	1.34027	1.2066	1.38375	2.62912	60.4697
		1.91455	3.46971	2.51555	2.675	2.88675	66.3953		1.91455	1.39487	1.34881	1.46934	1.40434	2.66825	61.3697
		1.98057	3.49077	2.95269	2.56425	3.00257	69.0591		1.98057	1.1994	1.31198	1.53088	1.34742	2.5601	58.8823
		2.04659	2.75058	2.9781	2.40108	2.70992	62.3282		2.04659	0.91457	0.8076	1.34335	1.02184	1.9415	44.6544
		2.11261	2.62104	2.52657	2.09892	2.41551	55.5567		2.11261	0.48329	0.79374	0.99806	0.758363	1.44089	33.1405
		2.17863	1.96598	2.27539	2.0436	2.09499	48.1848		2.17863	0.43278	0.59558	0.80112	0.609827	1.15867	26.6494
		2.24465	1.71497	2.17959	2.0194	1.97132	45.3404		2.24465	0.31076	0.42316	0.69654	0.47682	0.905958	20.837
		2.31067	1.50274	1.85862	1.88678	1.74938	40.2357		2.31067	0.20351	0.22649	0.46751	0.29917	0.568423	13.0737
		2.37669	1.4868	1.53402	1.8045	1.60844	36.9941		2.37669	0.10988	0.08113	0.43547	0.208827	0.396771	9.12573
		2.44271	1.21833	1.47179	1.60666	1.43226	32.942		2.44271	0.07507	0.08757	0.2324	0.13168	0.250192	5.75442
		2.50873	1.10728	1.24339	1.29552	1.2154	27.9541		2.50873	0	0.00578	0.24759	0.0844567	0.160468	3.69076
		2.57474	0.95353	1.17088	1.41399	1.17947	27.1277		2.57474	0	0.06146	0.40555	0.15567	0.295773	6.80278
		2.64076	0.7774	1.0962	1.29159	1.05506	24.2665		2.64076	0	7e-05	0.25582	0.0852967	0.162064	3.72746
		2.70678	0.79497	1.14216	1.0927	1.00994	23.2287		2.70678	0	0	0.18415	0.0613833	0.116628	2.68245
		2.7728	0.81346	1.07872	1.01168	0.967953	22.2629		2.7728	0	0	0.0976	0.0325333	0.0618133	1.42171

## Sheet: Figure 5E - source data 
		Figure 5E - source data. Fluorescent intensity values for line trace measurements of PAR-6::ZF1::YFP; mCherry::SEC-10 (heat shock ZIF-1)
		par-6(xn60); xnis485[mCherry::sec-10]; xnEx508[hsp-16.41p::zif-1; t28h11.8p::CFP, pRF4] heat shock zif-1 replicate3 061420
		image003
		red channel (mCh-sec-10)	measurements				multiply to fit to y-axis		yellow channel (par-6-zf1-yfp)	measurements					multiply to fit to y-axis
		distance (microns)	m1	m2	m3	avg	*23		distance (microns)	m1	m2	m3	avg	normalized to red channel	*23
		0	1.12156	1.73108	1.18703	1.34656	30.9708		0	0	0	0	0	0	0
		0.06602	1.2204	1.73929	1.21527	1.39165	32.008		0.06602	0	0	0	0	0	0
		0.13204	1.29767	1.61453	1.53667	1.48296	34.108		0.13204	0	0	0	0	0	0
		0.19806	1.57898	1.7106	1.63525	1.64161	37.757		0.19806	0	0	0	0	0	0
		0.26408	1.42958	2.11257	1.98772	1.84329	42.3957		0.26408	0	0	0	0	0	0
		0.3301	1.38581	1.84234	2.63117	1.95311	44.9215		0.3301	0	0	0	0	0	0
		0.39611	1.78681	2.00955	2.76342	2.18659	50.2916		0.39611	0	0	0	0	0	0
		0.46213	1.64104	1.98177	2.85729	2.16003	49.6808		0.46213	0	0	0	0	0	0
		0.52815	1.67211	2.10155	2.67683	2.15016	49.4538		0.52815	0	0	0	0	0	0
		0.59417	1.97454	1.95504	2.64262	2.19073	50.3869		0.59417	0	0	0	0	0	0
		0.66019	1.8784	1.99721	2.40374	2.09312	48.1417		0.66019	0	0	0	0	0	0
		0.72621	1.77653	2.17013	2.38956	2.11207	48.5777		0.72621	0	0	0	0	0	0
		0.79223	1.86014	2.45672	2.57736	2.29807	52.8557		0.79223	0	0	0	0	0	0
		0.85825	1.99007	2.36552	2.75339	2.36966	54.5022		0.85825	0	0.0291692	0	0.00972307	0.0184738	0.424898
		0.92427	2.20681	2.6172	2.71381	2.51261	57.79		0.92427	0	0.0658297	0	0.0219432	0.0416921	0.958919
		0.99029	2.33459	2.36796	2.64684	2.4498	56.3453		0.99029	0	0.0047149	0	0.00157163	0.0029861	0.0686804
		1.05631	2.05649	2.04292	2.25171	2.11704	48.6919		1.05631	0	0	0	0	0	0
		1.12232	1.79913	1.68553	1.7679	1.75085	40.2696		1.12232	0.0188937	0	0	0.0062979	0.011966	0.275218
		1.18834	1.87349	1.49784	1.59231	1.65455	38.0546		1.18834	0.0486965	0	0	0.0162322	0.0308411	0.709346
		1.25436	1.6077	1.2751	1.6323	1.50503	34.6158		1.25436	0	0	0	0	0	0
		1.32038	1.57117	1.18723	1.73604	1.49815	34.4574		1.32038	0	0	0	0	0	0
		1.3864	1.64427	1.32177	1.21603	1.39402	32.0625		1.3864	0.0299333	0	0	0.00997777	0.0189578	0.436028
		1.45242	1.62676	1.35667	1.34393	1.44245	33.1764		1.45242	0.0063215	0	0	0.00210717	0.00400362	0.0920832
		1.51844	1.6605	1.45152	1.74439	1.6188	37.2325		1.51844	0	0	0.001341	0.000447	0.0008493	0.0195339
		1.58446	1.56721	1.44435	1.52671	1.51276	34.7934		1.58446	0.0292478	0.0002492	0.0499767	0.0264912	0.0503333	1.15767
		1.65048	1.70081	1.57216	1.57368	1.61555	37.1577		1.65048	0.0065305	0.0336133	0.0237441	0.021296	0.0404623	0.930634
		1.7165	1.82053	1.80547	1.92108	1.84903	42.5276		1.7165	0.0334519	0.0333613	0.0307109	0.032508	0.0617653	1.4206
		1.78252	2.05019	2.16791	2.19926	2.13912	49.1998		1.78252	0.001732	0.0011185	0.0352133	0.0126879	0.0241071	0.554463
		1.84853	2.21853	2.34031	2.42317	2.32734	53.5287		1.84853	0	0.0029192	0.0542756	0.0190649	0.0362234	0.833138
		1.91455	2.39193	2.66773	2.76592	2.60853	59.9961		1.91455	0	0.0352453	0.0328378	0.0226944	0.0431193	0.991744
		1.98057	2.25965	2.75946	2.59398	2.5377	58.367		1.98057	0	0.0019033	0.0392187	0.0137073	0.0260439	0.59901
		2.04659	2.13897	2.58772	2.93716	2.55462	58.7562		2.04659	0	0	0.02812	0.00937333	0.0178093	0.409615
		2.11261	1.93927	2.50992	2.43089	2.29336	52.7473		2.11261	0	0	0.0517808	0.0172603	0.0327945	0.754274
		2.17863	2.13447	2.30832	2.33939	2.26073	51.9967		2.17863	0	0	0.0113288	0.00377627	0.00717491	0.165023
		2.24465	2.0352	2.21511	2.19473	2.14835	49.412		2.24465	0	0	0	0	0	0
		2.31067	1.95459	2.0483	2.15295	2.05195	47.1948		2.31067	0	0	0	0	0	0
		2.37669	1.70637	2.00678	2.50265	2.07193	47.6545		2.37669	0	0.0059376	0.0198757	0.00860443	0.0163484	0.376014
		2.44271	1.57138	2.31333	2.69492	2.19321	50.4438		2.44271	0	0.028283	0.0111613	0.0131481	0.0249814	0.574572
		2.50873	1.9026	2.11083	2.36659	2.12667	48.9135		2.50873	0	0.0002384	5.04e-05	9.62667e-05	0.000182907	0.00420685
		2.57474	1.87465	2.04121	2.22162	2.04583	47.054		2.57474	0	0	0.026837	0.00894567	0.0169968	0.390926
		2.64076	2.08274	1.93073	2.20592	2.07313	47.682		2.64076	0	0	0.0062846	0.00209487	0.00398025	0.0915457
		2.70678	2.01437	1.87477	2.00715	1.96543	45.2049		2.70678	0	0	0	0	0	0
		2.7728	1.93482	1.9025	1.74213	1.85982	42.7758		2.7728	0	0	0	0	0	0
		image011
		red channel (mCh-sec-10)	measurements				multiply to fit to y-axis		yellow channel (par-6-zf1-yfp)	measurements					multiply to fit to y-axis
		distance (microns)	m1	m2	m3	avg	*23		distance (microns)	m1	m2	m3	avg	normalized to red channel	*23
		0	1.97902	0.95837	1.49249	1.47663	33.9624		0	0	0	0	0	0	0
		0.06602	1.9835	1.20122	1.49125	1.55866	35.8491		0.06602	0	0	0	0	0	0
		0.13204	2.33955	1.35014	1.6585	1.78273	41.0028		0.13204	0	0	0	0	0	0
		0.19806	2.68531	1.27854	1.55764	1.8405	42.3314		0.19806	0	0	0	0	0	0
		0.26408	2.89873	1.2618	1.65433	1.93829	44.5806		0.26408	0	0	0	0	0	0
		0.3301	2.83215	1.43092	1.65671	1.97326	45.385		0.3301	0	0	0	0	0	0
		0.39611	2.62406	1.48004	1.53014	1.87808	43.1958		0.39611	0	0	0	0	0	0
		0.46213	2.38711	1.60832	1.62616	1.87386	43.0989		0.46213	0	0	0	0	0	0
		0.52815	2.04795	1.91938	1.7679	1.91174	43.9701		0.52815	0	0	0	0	0	0
		0.59417	1.92511	2.01441	1.71248	1.884	43.332		0.59417	0	0	0	0	0	0
		0.66019	1.77565	2.04675	1.935	1.91913	44.1401		0.66019	0	0	0	0	0	0
		0.72621	2.20439	2.11527	2.12029	2.14665	49.373		0.72621	0	0	0	0	0	0
		0.79223	2.15354	2.49078	1.92352	2.18928	50.3534		0.79223	0.0009161	0	0	0.000305367	0.000580197	0.0133445
		0.85825	2.07375	2.34041	2.14618	2.18678	50.2959		0.85825	0.0322992	0	0	0.0107664	0.0204562	0.470492
		0.92427	2.16172	2.24226	2.41834	2.27411	52.3045		0.92427	0.0008963	0	0	0.000298767	0.000567657	0.0130561
		0.99029	2.10141	2.43677	2.17423	2.23747	51.4618		0.99029	0	0	0	0	0	0
		1.05631	1.58326	2.26773	2.06711	1.9727	45.3721		1.05631	0	0	0	0	0	0
		1.12232	1.3597	1.92824	2.03214	1.77336	40.7873		1.12232	0	0	0	0	0	0
		1.18834	1.42584	1.5548	1.4368	1.47248	33.867		1.18834	0	0	0	0	0	0
		1.25436	1.20474	1.44756	1.22091	1.29107	29.6946		1.25436	0	0	0	0	0	0
		1.32038	1.30123	1.40669	1.45628	1.38807	31.9255		1.32038	0	0	0	0	0	0
		1.3864	1.3663	1.42361	1.50376	1.43122	32.9181		1.3864	0	0	0	0	0	0
		1.45242	1.36198	1.61936	1.4176	1.46631	33.7252		1.45242	0	0	0	0	0	0
		1.51844	1.2627	1.69452	1.41625	1.45782	33.5299		1.51844	0	0	0	0	0	0
		1.58446	1.38539	1.741	1.59519	1.57386	36.1988		1.58446	0	0	0	0	0	0
		1.65048	1.84458	1.68223	1.73534	1.75405	40.3432		1.65048	0	0	0.014495	0.00483166	0.00918015	0.211144
		1.7165	1.97662	2.04918	1.94933	1.99171	45.8093		1.7165	0	0	0.018815	0.00627166	0.0119162	0.274072
		1.78252	2.18816	1.95196	1.99554	2.04522	47.0401		1.78252	0	0.0021661	0	0.000722033	0.00137186	0.0315529
		1.84853	2.12621	2.33294	2.22671	2.22862	51.2583		1.84853	0	0.034233	0	0.011411	0.0216809	0.498661
		1.91455	1.80723	2.47452	2.17131	2.15102	49.4735		1.91455	0	0.0299901	0	0.0099967	0.0189937	0.436856
		1.98057	1.84936	2.33301	2.05849	2.08029	47.8466		1.98057	0	0	0	0	0	0
		2.04659	1.55229	2.40549	1.88292	1.9469	44.7787		2.04659	0	0	0	0	0	0
		2.11261	1.70603	2.29212	1.73798	1.91204	43.977		2.11261	0	0	0	0	0	0
		2.17863	1.6698	2.29208	1.76643	1.90944	43.917		2.17863	0	0	0.0133534	0.00445112	0.00845713	0.194514
		2.24465	1.67997	2.15216	2.07196	1.96803	45.2647		2.24465	0	0	0.019093	0.00636432	0.0120922	0.278121
		2.31067	1.57133	2.00301	2.00519	1.85984	42.7764		2.31067	0	0	0	0	0	0
		2.37669	1.71333	2.00932	1.85913	1.86059	42.7936		2.37669	0	0	0	0	0	0
		2.44271	1.77738	1.94937	1.45539	1.72738	39.7297		2.44271	0	0	0	0	0	0
		2.50873	1.45921	1.92044	1.32336	1.56767	36.0564		2.50873	0	0	0	0	0	0
		2.57474	1.51338	1.78056	1.31232	1.53542	35.3147		2.57474	0	0	0	0	0	0
		2.64076	1.31976	1.72684	1.07001	1.3722	31.5607		2.64076	0	0	0	0	0	0
		2.70678	1.48886	1.56576	0.88048	1.3117	30.1691		2.70678	0	0	0	0	0	0
		2.7728	1.50661	1.57587	0.90173	1.32807	30.5456		2.7728	0	0	0	0	0	0
		image013
		red channel (mCh-sec-10)	measurements				multiply to fit to y-axis		yellow channel (par-6-zf1-yfp)	measurements					multiply to fit to y-axis
		distance (microns)	m1	m2	m3	avg	*23		distance (microns)	m1	m2	m3	avg	normalized to red channel	*23
		0	1.60151	1.65729	0.5353	1.2647	29.0881		0	0	0	0	0	0	0
		0.06602	1.72867	1.66071	0.65252	1.3473	30.9879		0.06602	0	0	0	0	0	0
		0.13204	1.78488	1.62826	0.89068	1.43461	32.996		0.13204	0	0	0	0	0	0
		0.19806	2.02136	1.66761	0.84018	1.50972	34.7235		0.19806	0	0	0	0	0	0
		0.26408	1.83769	1.83326	0.80174	1.4909	34.2906		0.26408	0	0	0	0	0	0
		0.3301	1.83247	1.8833	0.97059	1.56212	35.9288		0.3301	0	0	0	0	0	0
		0.39611	2.03564	2.10412	1.19895	1.77957	40.9301		0.39611	0	0	0	0	0	0
		0.46213	1.9965	2.01854	1.19272	1.73592	39.9262		0.46213	0	0	0	0	0	0
		0.52815	1.9875	1.88444	1.18742	1.68645	38.7884		0.52815	0	0	0	0	0	0
		0.59417	1.88643	1.90887	1.3644	1.7199	39.5577		0.59417	0	0	0	0	0	0
		0.66019	1.80203	1.81182	1.7402	1.78468	41.0477		0.66019	0	0	0	0	0	0
		0.72621	1.81455	1.92349	1.65099	1.79634	41.3159		0.72621	0	0	0	0	0	0
		0.79223	2.21328	2.20748	1.67103	2.0306	46.7037		0.79223	0	0	0	0	0	0
		0.85825	2.16579	1.98944	1.65751	1.93758	44.5643		0.85825	0	0	0	0	0	0
		0.92427	2.07259	2.04236	1.58992	1.90162	43.7373		0.92427	0	0	0	0	0	0
		0.99029	1.91189	1.98241	1.46405	1.78612	41.0807		0.99029	0	0	0	0	0	0
		1.05631	1.63123	1.77928	1.13564	1.51538	34.8538		1.05631	0	0	0	0	0	0
		1.12232	1.34382	1.60366	1.29245	1.41331	32.5061		1.12232	0	0	0	0	0	0
		1.18834	1.34111	1.44948	1.18854	1.32638	30.5067		1.18834	0	0	0	0	0	0
		1.25436	1.23619	1.59985	1.16392	1.33332	30.6664		1.25436	0	0.0300971	0	0.0100324	0.0190615	0.438414
		1.32038	1.19788	1.44776	0.97201	1.20588	27.7353		1.32038	0	0.0036982	0	0.00123273	0.00234219	0.0538704
		1.3864	1.14309	1.08968	0.87234	1.03504	23.8058		1.3864	0	0	0	0	0	0
		1.45242	1.19354	1.27477	0.97619	1.14817	26.4078		1.45242	0	0	0	0	0	0
		1.51844	1.41702	1.26731	1.23286	1.30573	30.0318		1.51844	0	0	0	0	0	0
		1.58446	1.42151	1.54225	1.19222	1.38533	31.8625		1.58446	0	0	0	0	0	0
		1.65048	1.57412	1.75646	1.21791	1.51616	34.8718		1.65048	0	0	0	0	0	0
		1.7165	1.43907	1.61761	1.42779	1.49482	34.3809		1.7165	0	0	0	0	0	0
		1.78252	1.5959	1.84767	1.5674	1.67032	38.4174		1.78252	0	0	0	0	0	0
		1.84853	1.72729	1.82819	1.71571	1.75706	40.4125		1.84853	0	0	0	0	0	0
		1.91455	2.01012	1.81686	1.66815	1.83171	42.1293		1.91455	0	0	0	0	0	0
		1.98057	2.14101	2.06087	1.78133	1.9944	45.8713		1.98057	0	0	0	0	0	0
		2.04659	2.06412	1.78103	1.91086	1.91867	44.1294		2.04659	0	0	0	0	0	0
		2.11261	1.97578	1.90148	1.8102	1.89582	43.6039		2.11261	0	0	0	0	0	0
		2.17863	1.70293	1.65888	1.65804	1.67328	38.4855		2.17863	0	0	0	0	0	0
		2.24465	1.80703	1.72488	1.51324	1.68172	38.6795		2.24465	0	0	0	0	0	0
		2.31067	1.90123	1.71798	1.5293	1.71617	39.4719		2.31067	0	0	0	0	0	0
		2.37669	1.9586	1.85046	1.40921	1.73942	40.0067		2.37669	0	0	0	0	0	0
		2.44271	1.73148	1.81269	1.66974	1.73797	39.9733		2.44271	0	0	0	0	0	0
		2.50873	1.62739	1.88578	1.36547	1.62621	37.4029		2.50873	0	0	0	0	0	0
		2.57474	1.59316	1.95028	1.49731	1.68025	38.6457		2.57474	0	0	0	0	0	0
		2.64076	1.87617	2.02157	1.47553	1.79109	41.1951		2.64076	0	0	0	0	0	0
		2.70678	1.53693	1.81409	1.23262	1.52788	35.1412		2.70678	0	0	0	0	0	0
		2.7728	1.6906	1.34718	1.35945	1.46574	33.7121		2.7728	0	0	0	0	0	0
		image020
		red channel (mCh-sec-10)	measurements				multiply to fit to y-axis		yellow channel (par-6-zf1-yfp)	measurements					multiply to fit to y-axis
		distance (microns)	m1	m2	m3	avg	*23		distance (microns)	m1	m2	m3	avg	normalized to red channel	*23
		0	1.49539	1.57029	0.95307	1.33958	30.8104		0	0	0	0	0	0	0
		0.06602	1.51615	1.64316	0.97157	1.37696	31.6701		0.06602	0	0	0	0	0	0
		0.13204	1.7725	1.70644	1.24051	1.57315	36.1824		0.13204	0	0	0	0	0	0
		0.19806	1.57062	1.94173	1.21824	1.57686	36.2679		0.19806	0	0	0	0	0	0
		0.26408	1.46764	1.86641	1.48613	1.60673	36.9547		0.26408	0	0	0	0	0	0
		0.3301	1.74015	1.79854	1.75706	1.76525	40.6007		0.3301	0	0	0	0	0	0
		0.39611	1.65019	2.19478	1.89213	1.91237	43.9844		0.39611	0	0	0	0	0	0
		0.46213	1.6415	2.31712	2.01647	1.9917	45.8091		0.46213	0	0	0	0	0	0
		0.52815	1.86471	2.05852	1.96739	1.96354	45.1614		0.52815	0	0	0	0	0	0
		0.59417	1.80236	1.96421	1.8877	1.88476	43.3494		0.59417	0	0	0	0	0	0
		0.66019	2.02295	2.21213	2.12933	2.12147	48.7938		0.66019	0	0	0	0	0	0
		0.72621	1.92574	2.27287	2.38526	2.19462	50.4764		0.72621	0	0	0	0	0	0
		0.79223	1.75575	2.37288	2.36049	2.16304	49.75		0.79223	0	0.0114077	0	0.00380257	0.00722488	0.166172
		0.85825	1.78765	2.40314	2.08113	2.09064	48.0847		0.85825	0	0.0224706	0	0.0074902	0.0142314	0.327322
		0.92427	1.71595	2.40201	1.91468	2.01088	46.2502		0.92427	0	0	0	0	0	0
		0.99029	1.72883	2.08639	1.92431	1.91318	44.0031		0.99029	0	0	0	0	0	0
		1.05631	1.76042	1.58491	1.70543	1.68359	38.7225		1.05631	0	0	0	0	0	0
		1.12232	1.67843	1.71437	1.42899	1.60726	36.9671		1.12232	0	0	0	0	0	0
		1.18834	1.4197	1.66025	1.44785	1.50927	34.7131		1.18834	0	0	0	0	0	0
		1.25436	1.65178	1.66609	1.63615	1.65134	37.9808		1.25436	0	0	0	0	0	0
		1.32038	1.59055	1.46769	1.48824	1.51549	34.8563		1.32038	0	0	0	0	0	0
		1.3864	1.32954	1.19528	1.47781	1.33421	30.6868		1.3864	0	0	0	0	0	0
		1.45242	1.07448	1.38004	1.54253	1.33235	30.6441		1.45242	0	0	0	0	0	0
		1.51844	1.37013	1.51112	1.43257	1.43794	33.0726		1.51844	0	0.0121799	0	0.00405997	0.00771394	0.177421
		1.58446	1.28931	1.69278	1.62097	1.53435	35.2901		1.58446	0	0.0361953	0	0.0120651	0.0229237	0.527245
		1.65048	1.26957	1.96334	1.5929	1.60861	36.9979		1.65048	0	0.0339179	0	0.011306	0.0214813	0.494071
		1.7165	1.43277	2.05704	1.5924	1.69407	38.9636		1.7165	0	0.0192467	0	0.00641557	0.0121896	0.28036
		1.78252	1.627	2.15777	1.9282	1.90432	43.7994		1.78252	0	0.0017445	0	0.0005815	0.00110485	0.0254115
		1.84853	1.73847	2.49589	1.8215	2.01862	46.4283		1.84853	0	0.0292319	0	0.00974397	0.0185135	0.425811
		1.91455	1.89319	2.37303	2.10316	2.12313	48.8319		1.91455	0	0.0041853	0	0.0013951	0.00265069	0.0609659
		1.98057	2.05422	2.17503	2.2213	2.15018	49.4542		1.98057	0	0.0290133	0	0.0096711	0.0183751	0.422627
		2.04659	1.86692	2.15526	2.49372	2.17197	49.9552		2.04659	0	0.0006112	0	0.000203733	0.000387093	0.00890315
		2.11261	1.73261	2.3635	2.11577	2.07063	47.6244		2.11261	0	0	0	0	0	0
		2.17863	1.71633	2.07701	2.21611	2.00315	46.0724		2.17863	0.0051774	0	0	0.0017258	0.00327902	0.0754175
		2.24465	1.65006	1.92341	2.09547	1.88965	43.4619		2.24465	0.0279313	0.003374	0	0.0104351	0.0198267	0.456014
		2.31067	1.45583	1.80532	2.04134	1.7675	40.6524		2.31067	0	0.0323527	0	0.0107842	0.02049	0.471271
		2.37669	1.697	1.81126	2.19474	1.901	43.723		2.37669	0	0	0	0	0	0
		2.44271	1.54449	1.6826	2.1025	1.77653	40.8602		2.44271	0	0	0	0	0	0
		2.50873	1.44521	1.85929	1.81262	1.70571	39.2313		2.50873	0	0	0	0	0	0
		2.57474	1.4676	1.84045	1.71849	1.67551	38.5368		2.57474	0	0	0	0	0	0
		2.64076	1.36546	1.87109	1.90516	1.7139	39.4198		2.64076	0	0	0	0	0	0
		2.70678	1.19821	1.91571	1.90277	1.67223	38.4613		2.70678	0	0	0	0	0	0
		2.7728	1.32452	1.6337	1.84064	1.59962	36.7912		2.7728	0	0	0	0	0	0
		image009
		red channel (mCh-sec-10)	measurements				multiply to fit to y-axis		yellow channel (par-6-zf1-yfp)	measurements					multiply to fit to y-axis
		distance (microns)	m1	m2	m3	avg	*23		distance (microns)	m1	m2	m3	avg	normalized to red channel	*23
		0	1.66186	1.07918	0.89215	1.21106	27.8545		0	0	0	0	0	0	0
		0.06602	1.6417	1.35383	0.96048	1.31867	30.3294		0.06602	0	0	0	0	0	0
		0.13204	1.69522	1.45842	0.94714	1.36693	31.4393		0.13204	0	0	0	0	0	0
		0.19806	1.86373	1.24558	1.15706	1.42212	32.7088		0.19806	0	0	0	0	0	0
		0.26408	1.95786	1.16809	1.4025	1.50948	34.7181		0.26408	0	0	0	0	0	0
		0.3301	2.40334	1.03427	1.51734	1.65165	37.9879		0.3301	0	0	0	0	0	0
		0.39611	2.32002	1.00393	1.33475	1.5529	35.7167		0.39611	0	0	0	0	0	0
		0.46213	2.20289	1.31377	1.58821	1.70162	39.1373		0.46213	0	0	0	0	0	0
		0.52815	1.953	1.27354	1.96292	1.72982	39.7859		0.52815	0	0	0	0	0	0
		0.59417	2.04715	1.63117	1.99876	1.89236	43.5243		0.59417	0	0	0	0	0	0
		0.66019	2.23093	1.74916	2.05638	2.01216	46.2796		0.66019	0.0279447	0	0	0.0093149	0.0176983	0.407061
		0.72621	2.42996	1.82967	2.12422	2.12795	48.9428		0.72621	0	0	0	0	0	0
		0.79223	2.34989	1.9845	2.10781	2.1474	49.3902		0.79223	0	0	0	0	0	0
		0.85825	2.30936	1.98637	1.83436	2.04336	46.9974		0.85825	0	0	0	0	0	0
		0.92427	2.02876	1.9316	1.50493	1.82176	41.9006		0.92427	0	0	0	0	0	0
		0.99029	1.92516	1.91667	1.5001	1.78064	40.9548		0.99029	0	0	0	0	0	0
		1.05631	1.67388	1.69761	1.33044	1.56731	36.0481		1.05631	0	0	0	0	0	0
		1.12232	1.49676	1.66983	1.13656	1.43438	32.9908		1.12232	0	0	0	0	0	0
		1.18834	1.54801	1.48433	0.97809	1.33681	30.7466		1.18834	0	0	0	0	0	0
		1.25436	1.38534	1.6671	1.10376	1.3854	31.8642		1.25436	0	0	0	0	0	0
		1.32038	1.3943	1.49323	0.97607	1.28787	29.6209		1.32038	0	0	0	0	0	0
		1.3864	1.32108	1.17468	0.81274	1.10283	25.3652		1.3864	0	0	0	0	0	0
		1.45242	1.23968	1.08766	0.84958	1.05897	24.3564		1.45242	0	0	0	0	0	0
		1.51844	1.40823	1.27489	0.99526	1.22613	28.2009		1.51844	0	0	0	0	0	0
		1.58446	1.53161	1.19598	1.01076	1.24612	28.6607		1.58446	0	0	0	0	0	0
		1.65048	1.6542	1.31362	1.04841	1.33874	30.7911		1.65048	0	0	0	0	0	0
		1.7165	1.8475	1.57286	1.32755	1.58264	36.4006		1.7165	0	0	0	0	0	0
		1.78252	2.12355	1.59929	1.65691	1.79325	41.2447		1.78252	0	0	0	0	0	0
		1.84853	2.59456	1.79854	1.84965	2.08092	47.8611		1.84853	0	0	0	0	0	0
		1.91455	2.45404	1.75931	1.94203	2.05179	47.1912		1.91455	0	0	0	0	0	0
		1.98057	2.47311	2.02586	2.18016	2.22638	51.2067		1.98057	0	0	0	0	0	0
		2.04659	2.14559	1.95715	1.81493	1.97256	45.3688		2.04659	0	0	0	0	0	0
		2.11261	2.05661	2.09483	1.7898	1.98041	45.5495		2.11261	0	0	0	0	0	0
		2.17863	1.99429	1.77684	1.7884	1.85318	42.6231		2.17863	0	0	0	0	0	0
		2.24465	2.33139	1.75869	1.52624	1.87211	43.0585		2.24465	0	0	0	0	0	0
		2.31067	2.01067	1.40056	1.60011	1.67045	38.4203		2.31067	0	0	0	0	0	0
		2.37669	2.02584	1.22112	1.59719	1.61472	37.1385		2.37669	0	0	0.0251103	0.0083701	0.0159032	0.365773
		2.44271	1.71856	1.27108	1.61006	1.53323	35.2644		2.44271	0	0	0.0712243	0.0237414	0.0451087	1.0375
		2.50873	1.67386	0.75016	1.58014	1.33472	30.6986		2.50873	0	0	0.007766	0.00258867	0.00491847	0.113125
		2.57474	1.55477	0.61251	1.47153	1.21294	27.8975		2.57474	0	0	0	0	0	0
		2.64076	1.57292	0.90522	1.40408	1.29407	29.7637		2.64076	0	0	0	0	0	0
		2.70678	1.61874	0.85697	1.27844	1.25138	28.7818		2.70678	0	0	0	0	0	0
		2.7728	1.7338	0.71445	1.06894	1.1724	26.9651		2.7728	0	0	0	0	0	0

## Sheet: Figure 5I - source data
		Figure 5I - source data. Fluorescent intensity values for line trace measurements of PAR-3::ZF1::YFP; mCherry::SEC-10 (control)
		par-3(xn59); xnIs485; xnEx514[t28h11.8p::cfp, pRF4] control A5 01092019
		image001
		red channel (mCh-sec-10)	measurements				multiply to fit to y-axis		yellow channel (par-3-zf1-yfp)	measurements					multiply to fit to y-axis
		distance (microns)	m1	m2	m3	avg	*21		distance (microns)	m1	m2	m3	avg	normalized to red channel	*21
		0	0.94568	2.94001	1.27098	1.71889	36.0967		0	0.0126	0.07704	0.07042	0.0533533	0.048018	1.00838
		0.06602	1.44686	2.64425	1.51137	1.86749	39.2174		0.06602	0.0635	0.05786	0.06092	0.06076	0.054684	1.14836
		0.13204	1.37324	2.60563	1.80465	1.92784	40.4846		0.13204	0.0299	0.01767	0.16638	0.0713167	0.064185	1.34789
		0.19806	1.19955	2.32984	1.55269	1.69403	35.5746		0.19806	0.12119	0.11796	0.17556	0.138237	0.124413	2.61267
		0.26408	1.32352	1.95802	1.85078	1.71077	35.9262		0.26408	0.15764	0.10872	0.16962	0.145327	0.130794	2.74667
		0.3301	1.4948	2.12343	2.00173	1.87332	39.3397		0.3301	0.32172	0.17895	0.11505	0.20524	0.184716	3.87904
		0.39611	1.91493	2.37934	2.00702	2.10043	44.109		0.39611	0.71247	0.35219	0.28388	0.449513	0.404562	8.4958
		0.46213	2.10207	2.60658	2.93571	2.54812	53.5105		0.46213	0.80356	0.49324	0.61833	0.638377	0.574539	12.0653
		0.52815	2.78965	2.5402	3.71574	3.0152	63.3191		0.52815	1.22989	0.99138	0.97928	1.06685	0.960165	20.1635
		0.59417	3.07364	2.881	4.387	3.44721	72.3915		0.59417	1.83302	1.57348	0.96963	1.45871	1.31284	27.5696
		0.66019	3.45601	3.55864	5.07386	4.0295	84.6196		0.66019	2.24446	2.25387	1.51056	2.00296	1.80267	37.856
		0.72621	3.53835	3.81205	5.39321	4.24787	89.2053		0.72621	2.41028	2.99463	2.22433	2.54308	2.28877	48.0642
		0.79223	3.41539	3.98138	5.12046	4.17241	87.6206		0.79223	2.8481	3.3395	2.78052	2.98937	2.69044	56.4992
		0.85825	3.01184	3.46259	4.49656	3.657	76.7969		0.85825	2.77529	2.94863	3.30133	3.00842	2.70758	56.8591
		0.92427	2.57881	2.94721	3.65258	3.05953	64.2502		0.92427	2.54493	2.36085	3.2344	2.71339	2.44205	51.2831
		0.99029	2.16925	2.61251	3.0168	2.59952	54.5899		0.99029	2.19217	2.35864	2.84312	2.46464	2.21818	46.5818
		1.05631	1.8903	2.31842	2.45314	2.22062	46.633		1.05631	1.81972	1.9677	2.62927	2.1389	1.92501	40.4251
		1.12232	1.77462	2.34553	2.06182	2.06066	43.2738		1.12232	1.67509	1.9047	2.19623	1.92534	1.73281	36.3889
		1.18834	1.74912	1.95642	2.23427	1.97994	41.5787		1.18834	1.70062	1.93589	2.01296	1.88316	1.69484	35.5917
		1.25436	1.51902	1.54169	2.19938	1.75336	36.8206		1.25436	1.45132	1.57133	1.80137	1.60801	1.44721	30.3913
		1.32038	1.2234	1.5027	2.16395	1.63002	34.2303		1.32038	1.18766	1.37777	1.63922	1.40155	1.2614	26.4893
		1.3864	1.36633	1.45269	2.32259	1.71387	35.9913		1.3864	0.9165	1.6366	1.52061	1.3579	1.22211	25.6644
		1.45242	1.52031	1.64491	2.51752	1.89425	39.7792		1.45242	0.91082	1.51304	1.62986	1.35124	1.21612	25.5384
		1.51844	1.6205	1.57628	2.17553	1.79077	37.6062		1.51844	1.00364	1.87596	1.55612	1.47857	1.33072	27.945
		1.58446	1.66564	1.94729	2.38075	1.99789	41.9558		1.58446	1.22903	2.0575	1.72428	1.67027	1.50324	31.5681
		1.65048	1.84472	1.90746	2.46632	2.07283	43.5295		1.65048	1.5778	2.22571	1.97178	1.9251	1.73259	36.3843
		1.7165	2.1354	2.02256	2.71901	2.29232	48.1388		1.7165	1.9659	2.60258	2.10752	2.22533	2.0028	42.0588
		1.78252	2.47155	2.50835	3.36669	2.7822	58.4261		1.78252	2.79584	2.91798	2.48141	2.73174	2.45857	51.6299
		1.84853	2.98242	2.98541	3.88486	3.28423	68.9688		1.84853	3.46843	3.55357	3.02158	3.34786	3.01307	63.2746
		1.91455	3.89743	3.72341	4.69806	4.1063	86.2323		1.91455	4.03127	3.96727	2.95234	3.65029	3.28526	68.9905
		1.98057	4.17183	3.95345	5.56103	4.5621	95.8042		1.98057	3.69606	3.43493	2.83911	3.32337	2.99103	62.8116
		2.04659	4.62428	4.02694	5.87291	4.84138	101.669		2.04659	2.93633	3.00925	2.26314	2.73624	2.46262	51.7149
		2.11261	4.25998	3.22925	5.28916	4.25946	89.4487		2.11261	2.07464	2.11072	1.69873	1.96136	1.76523	37.0698
		2.17863	3.57717	2.49391	5.08401	3.71836	78.0856		2.17863	1.32442	1.3628	1.31164	1.33295	1.19966	25.1928
		2.24465	2.9475	2.05318	4.40977	3.13682	65.8731		2.24465	0.83609	0.73519	0.81475	0.795343	0.715809	15.032
		2.31067	2.22268	1.83845	2.72365	2.26159	47.4935		2.31067	0.68829	0.26334	0.45527	0.468967	0.42207	8.86347
		2.37669	1.93449	2.04778	2.24213	2.0748	43.5708		2.37669	0.29955	0.19966	0.21637	0.238527	0.214674	4.50815
		2.44271	1.49676	1.67859	1.80463	1.65999	34.8599		2.44271	0.21372	0.13193	0.13323	0.159627	0.143664	3.01694
		2.50873	1.62317	1.68194	1.57971	1.62827	34.1937		2.50873	0.11717	0.05859	0.0335	0.0697533	0.062778	1.31834
		2.57474	1.67095	1.3303	1.35949	1.45358	30.5252		2.57474	0.11189	0.06108	0.06839	0.0804533	0.072408	1.52057
		2.64076	1.34128	1.15805	1.30712	1.26882	26.6452		2.64076	0.09276	0.05154	0.05524	0.0665133	0.059862	1.2571
		2.70678	1.35981	1.13743	1.41185	1.30303	27.3636		2.70678	0.21824	0.03603	0.10667	0.120313	0.108282	2.27392
		2.7728	1.21729	1.12356	1.53647	1.29244	27.1412		2.7728	0.12862	0.04646	0.05787	0.07765	0.069885	1.46759
		image005
		red channel (mCh-sec-10)	measurements				multiply to fit to y-axis		yellow channel (par-3-zf1-yfp)	measurements					multiply to fit to y-axis
		distance (microns)	m1	m2	m3	avg	*21		distance (microns)	m1	m2	m3	avg	normalized to red channel	*21
		0	1.42383	1.7213	1.68956	1.61156	33.8428		0	0.03829	0.08483	0.03598	0.0530333	0.04773	1.00233
		0.06602	1.50632	1.91431	1.72328	1.71464	36.0074		0.06602	0	0.07451	0.03472	0.03641	0.032769	0.688149
		0.13204	1.85705	1.93073	1.84313	1.87697	39.4164		0.13204	0	0.07722	0.00191	0.0263767	0.023739	0.498519
		0.19806	2.07404	1.78852	1.74486	1.86914	39.2519		0.19806	0.0233	0.04294	0.04433	0.0368567	0.033171	0.696591
		0.26408	1.89339	1.54943	1.43741	1.62674	34.1616		0.26408	0.0196	0.03135	0.05629	0.0357467	0.032172	0.675612
		0.3301	1.74825	1.59232	1.56737	1.63598	34.3556		0.3301	0.03032	0.08978	0.02091	0.0470033	0.042303	0.888363
		0.39611	1.32953	1.81651	1.59859	1.58154	33.2124		0.39611	0.01188	0.07017	0.0787	0.0535833	0.048225	1.01273
		0.46213	1.30798	2.19176	1.564	1.68791	35.4462		0.46213	0.06972	0.11406	0.22117	0.134983	0.121485	2.55119
		0.52815	1.58325	2.08578	1.71332	1.79412	37.6765		0.52815	0.12955	0.09523	0.20451	0.143097	0.128787	2.70453
		0.59417	1.74271	2.33784	1.93994	2.00683	42.1434		0.59417	0.17572	0.15079	0.36754	0.23135	0.208215	4.37251
		0.66019	1.79048	2.73496	2.19561	2.24035	47.0473		0.66019	0.349	0.47268	0.88207	0.567917	0.511125	10.7336
		0.72621	2.04794	2.98741	2.86111	2.63215	55.2752		0.72621	0.82906	1.2922	2.08605	1.40244	1.26219	26.5061
		0.79223	2.51812	3.23615	3.23269	2.99565	62.9087		0.79223	1.59358	2.48667	3.87016	2.65014	2.38512	50.0876
		0.85825	2.78197	3.33906	3.89268	3.3379	70.096		0.85825	2.623	4.05543	5.54293	4.07379	3.66641	76.9946
		0.92427	3.1139	3.77177	3.90838	3.59802	75.5584		0.92427	3.66657	5.18397	6.0086	4.95305	4.45774	93.6126
		0.99029	3.19008	3.33959	3.51531	3.34833	70.3149		0.99029	4.18238	5.18775	5.096	4.82204	4.33984	91.1366
		1.05631	2.78026	2.3618	2.78803	2.64336	55.5106		1.05631	3.36595	4.32975	4.23944	3.97838	3.58054	75.1914
		1.12232	2.16279	1.71148	1.85349	1.90925	40.0943		1.12232	2.66109	3.16499	3.62453	3.1502	2.83518	59.5388
		1.18834	1.88564	1.46953	1.44574	1.6003	33.6064		1.18834	2.11339	2.56163	3.10187	2.5923	2.33307	48.9944
		1.25436	1.54975	1.48349	1.37965	1.47096	30.8902		1.25436	1.536	2.26784	2.37672	2.06019	1.85417	38.9375
		1.32038	1.34527	1.67225	1.41148	1.47633	31.003		1.32038	1.68323	2.2025	2.74998	2.2119	1.99071	41.805
		1.3864	1.11767	1.54661	1.34845	1.33758	28.0891		1.3864	1.79045	1.92561	2.75425	2.15677	1.94109	40.763
		1.45242	1.26224	1.5743	1.46405	1.43353	30.1041		1.45242	1.66567	1.81146	2.88779	2.12164	1.90948	40.099
		1.51844	1.41471	1.83803	1.57845	1.6104	33.8183		1.51844	1.50178	1.68568	2.87662	2.02136	1.81922	38.2037
		1.58446	1.30598	1.93445	1.61401	1.61815	33.9811		1.58446	1.97997	1.61676	3.4614	2.35271	2.11744	44.4662
		1.65048	1.78016	1.85182	1.63236	1.75478	36.8504		1.65048	2.35077	1.91305	4.11731	2.79371	2.51434	52.8011
		1.7165	1.93636	1.96139	2.20512	2.03429	42.7201		1.7165	2.66178	2.80208	4.86702	3.44363	3.09926	65.0845
		1.78252	2.09545	2.09637	2.68503	2.29228	48.1379		1.78252	3.13792	3.61224	6.56717	4.43911	3.9952	83.8992
		1.84853	2.39348	2.7292	3.08946	2.73738	57.485		1.84853	4.02508	4.78132	7.42066	5.40902	4.86812	102.23
		1.91455	2.97941	3.45111	3.62892	3.35315	70.4161		1.91455	4.36187	4.99456	6.0152	5.12388	4.61149	96.8413
		1.98057	3.19961	4.02742	3.3254	3.51748	73.867		1.98057	3.67515	4.54966	3.42135	3.88205	3.49385	73.3708
		2.04659	3.12822	3.78812	2.6628	3.19305	67.054		2.04659	2.48681	2.85657	1.41851	2.25396	2.02857	42.5999
		2.11261	2.88606	3.06185	2.44823	2.79871	58.773		2.11261	1.8676	1.38526	0.52699	1.25995	1.13396	23.8131
		2.17863	2.51584	2.34406	2.1972	2.35237	49.3997		2.17863	0.78519	0.65832	0.05076	0.49809	0.448281	9.4139
		2.24465	1.90927	1.96442	1.6641	1.84593	38.7645		2.24465	0.28067	0.35572	0.05961	0.232	0.2088	4.3848
		2.31067	1.73408	1.87768	1.79009	1.80062	37.813		2.31067	0.04952	0.25509	0.00665	0.103753	0.093378	1.96094
		2.37669	1.61156	1.52071	1.43931	1.52386	32.0011		2.37669	0.06023	0.11317	0.03154	0.0683133	0.061482	1.29112
		2.44271	1.53634	1.46245	1.6424	1.54706	32.4883		2.44271	0.00645	0.12062	0.00018	0.0424167	0.038175	0.801675
		2.50873	1.37353	1.44391	1.59661	1.47135	30.8983		2.50873	0.02912	0.19211	0.00569	0.07564	0.068076	1.4296
		2.57474	1.5634	1.73814	1.45533	1.58562	33.2981		2.57474	0.05029	0.16094	0	0.07041	0.063369	1.33075
		2.64076	1.31257	1.7484	1.64011	1.56703	32.9076		2.64076	0.01533	0.20763	0.02779	0.0835833	0.075225	1.57973
		2.70678	1.11311	1.49427	1.65957	1.42232	29.8686		2.70678	0.07168	0.15404	0.03966	0.08846	0.079614	1.67189
		2.7728	1.12972	1.47961	1.39813	1.33582	28.0522		2.7728	0.05902	0.057	0.00126	0.0390933	0.035184	0.738864
		image007
		red channel (mCh-sec-10)	measurements				multiply to fit to y-axis		yellow channel (par-3-zf1-yfp)	measurements					multiply to fit to y-axis
		distance (microns)	m1	m2	m3	avg	*21		distance (microns)	m1	m2	m3	avg	normalized to red channel	*21
		0	0.51324	0.45229	0.50326	0.489597	10.2815		0	0	0.03198	0.01373	0.0152367	0.013713	0.287973
		0.06602	0.53479	0.55931	0.61901	0.571037	11.9918		0.06602	0.00342	0.00117	0.02028	0.00829	0.007461	0.156681
		0.13204	0.78336	0.5142	0.64602	0.64786	13.6051		0.13204	0.03962	0.02728	0.0336	0.0335	0.03015	0.63315
		0.19806	0.69947	0.63729	0.96162	0.766127	16.0887		0.19806	0.03364	0.00571	0	0.0131167	0.011805	0.247905
		0.26408	0.9223	0.6707	1.25769	0.95023	19.9548		0.26408	0.02481	0	0.00259	0.00913333	0.00822	0.17262
		0.3301	1.3026	0.66593	1.50588	1.15814	24.3209		0.3301	0.00601	0	0.02966	0.01189	0.010701	0.224721
		0.39611	1.47888	0.89259	1.59136	1.32094	27.7398		0.39611	0	0	0.01043	0.00347667	0.003129	0.065709
		0.46213	1.69569	1.0299	1.69346	1.47302	30.9334		0.46213	0.02855	0	0.03076	0.01977	0.017793	0.373653
		0.52815	2.07823	1.2794	1.9571	1.77158	37.2031		0.52815	0.11825	0.00041	0.08854	0.0690667	0.06216	1.30536
		0.59417	2.32824	1.50801	2.35445	2.06357	43.3349		0.59417	0.41848	0.14647	0.31453	0.29316	0.263844	5.54072
		0.66019	2.54047	1.92087	2.77636	2.41257	50.6639		0.66019	0.67353	0.649	1.06464	0.795723	0.716151	15.0392
		0.72621	2.99057	1.90965	3.2927	2.73097	57.3504		0.72621	1.22444	1.25478	1.88395	1.45439	1.30895	27.488
		0.79223	3.36472	2.63569	3.49368	3.1647	66.4586		0.79223	1.9559	2.19625	2.44958	2.20058	1.98052	41.5909
		0.85825	2.95779	2.82669	3.38587	3.05678	64.1925		0.85825	2.30165	2.74351	3.02004	2.6884	2.41956	50.8108
		0.92427	3.10642	2.54952	2.81568	2.82387	59.3013		0.92427	2.31989	3.45465	2.71676	2.83043	2.54739	53.4952
		0.99029	2.72237	2.49892	2.01222	2.41117	50.6346		0.99029	2.136	3.15258	2.00026	2.42961	2.18665	45.9197
		1.05631	2.31161	2.1737	1.75756	2.08096	43.7001		1.05631	1.98153	2.47336	1.51755	1.99081	1.79173	37.6264
		1.12232	1.67738	1.75435	1.38666	1.60613	33.7287		1.12232	1.6658	1.67645	1.14167	1.49464	1.34518	28.2487
		1.18834	1.56871	1.45958	1.21716	1.41515	29.7181		1.18834	1.43005	1.46087	1.04304	1.31132	1.18019	24.7839
		1.25436	1.47248	1.36728	1.2363	1.35869	28.5324		1.25436	1.33329	1.0244	0.78696	1.04822	0.943395	19.8113
		1.32038	1.19341	1.46074	1.16294	1.27236	26.7196		1.32038	0.97985	0.99123	0.78401	0.918363	0.826527	17.3571
		1.3864	1.34106	1.52753	0.99256	1.28705	27.0281		1.3864	0.92994	0.98571	0.527	0.814217	0.732795	15.3887
		1.45242	1.31125	1.34732	1.1254	1.26132	26.4878		1.45242	1.11169	0.97576	0.66124	0.91623	0.824607	17.3167
		1.51844	1.38192	1.2758	1.04062	1.23278	25.8884		1.51844	1.08833	1.16259	0.65243	0.967783	0.871005	18.2911
		1.58446	1.66267	1.22104	0.82723	1.23698	25.9766		1.58446	1.29287	1.26688	0.64869	1.06948	0.962532	20.2132
		1.65048	1.87388	1.54839	0.84099	1.42109	29.8428		1.65048	1.53308	1.19341	0.71397	1.14682	1.03214	21.6749
		1.7165	2.39071	1.7286	0.79763	1.63898	34.4186		1.7165	1.73004	1.57972	0.98555	1.43177	1.28859	27.0605
		1.78252	2.96747	2.00349	0.84183	1.9376	40.6895		1.78252	1.87387	2.179	1.30976	1.78754	1.60879	33.7846
		1.84853	3.41067	2.65508	1.42367	2.49647	52.4259		1.84853	2.04357	2.38946	1.71574	2.04959	1.84463	38.7373
		1.91455	3.28758	3.09697	1.7487	2.71108	56.9327		1.91455	1.75406	2.10352	2.5891	2.14889	1.934	40.6141
		1.98057	3.12098	3.37805	2.31161	2.93688	61.6745		1.98057	1.24947	1.67356	3.29849	2.07384	1.86646	39.1956
		2.04659	2.3202	3.16689	2.65746	2.71485	57.0119		2.04659	0.64687	0.84716	3.46974	1.65459	1.48913	31.2718
		2.11261	1.76944	2.44826	2.62343	2.28038	47.8879		2.11261	0.32977	0.30815	2.88891	1.17561	1.05805	22.219
		2.17863	1.34671	2.00744	2.5556	1.96992	41.3682		2.17863	0.06137	0.11668	1.76484	0.64763	0.582867	12.2402
		2.24465	1.22374	1.35793	2.26539	1.61569	33.9294		2.24465	0.01247	0.04932	0.68915	0.250313	0.225282	4.73092
		2.31067	1.09857	1.24298	1.75633	1.36596	28.6852		2.31067	0.035	0.00229	0.05309	0.0301267	0.027114	0.569394
		2.37669	1.05219	0.93938	1.6663	1.21929	25.6051		2.37669	0.02583	0	0	0.00861	0.007749	0.162729
		2.44271	0.95597	0.83474	1.57794	1.12288	23.5805		2.44271	0	0.01375	0	0.00458333	0.004125	0.086625
		2.50873	0.6382	0.87104	1.27023	0.92649	19.4563		2.50873	0	0.01666	0.01089	0.00918333	0.008265	0.173565
		2.57474	0.65364	0.89913	1.20109	0.917953	19.277		2.57474	0	0	0.05577	0.01859	0.016731	0.351351
		2.64076	0.72243	0.75106	1.05852	0.844003	17.7241		2.64076	0	0.00725	0	0.00241667	0.002175	0.045675
		2.70678	0.68936	0.73798	1.07131	0.832883	17.4905		2.70678	0	0.02573	0	0.00857667	0.007719	0.162099
		2.7728	0.44066	0.77847	0.84042	0.686517	14.4168		2.7728	0	0	0	0	0	0
		image011
		red channel (mCh-sec-10)	measurements				multiply to fit to y-axis		yellow channel (par-3-zf1-yfp)	measurements					multiply to fit to y-axis
		distance (microns)	m1	m2	m3	avg	*21		distance (microns)	m1	m2	m3	avg	normalized to red channel	*21
		0	0.47176	1.96755	1.83021	1.42317	29.8866		0	0.00747	0.1427	0.04887	0.0663467	0.059712	1.25395
		0.06602	0.4573	2.02489	1.54396	1.34205	28.1831		0.06602	0.02127	0.20607	0.0286	0.0853133	0.076782	1.61242
		0.13204	0.75598	1.85499	1.52581	1.37893	28.9575		0.13204	0.04076	0.1117	0.02436	0.05894	0.053046	1.11397
		0.19806	0.79124	1.56382	1.70815	1.3544	28.4425		0.19806	0.0048	0.05833	0.03812	0.03375	0.030375	0.637875
		0.26408	0.88268	1.514	1.60951	1.3354	28.0433		0.26408	0.03338	0.02792	0.00476	0.02202	0.019818	0.416178
		0.3301	1.02882	1.28957	1.54655	1.28831	27.0546		0.3301	0.02583	0.01498	0.01254	0.0177833	0.016005	0.336105
		0.39611	1.18596	1.1661	1.65509	1.33572	28.05		0.39611	0.01031	0.06891	0.03499	0.03807	0.034263	0.719523
		0.46213	1.31575	1.24467	1.76829	1.4429	30.301		0.46213	0.01008	0.02024	0.0294	0.0199067	0.017916	0.376236
		0.52815	1.34117	1.11288	1.79242	1.41549	29.7253		0.52815	0.05138	0.07574	0.09975	0.0756233	0.068061	1.42928
		0.59417	1.47101	1.35707	1.69208	1.50672	31.6411		0.59417	0.19195	0.14954	0.16348	0.168323	0.151491	3.18131
		0.66019	1.79047	1.48253	1.76308	1.67869	35.2526		0.66019	0.42895	0.50446	0.3	0.411137	0.370023	7.77048
		0.72621	2.07259	1.8932	1.9957	1.98716	41.7304		0.72621	0.75535	1.12457	0.85476	0.91156	0.820404	17.2285
		0.79223	3.04857	2.65243	2.53586	2.74562	57.658		0.79223	1.67866	1.73305	1.77499	1.7289	1.55601	32.6762
		0.85825	3.5582	3.2082	2.86253	3.20964	67.4025		0.85825	2.31056	2.5331	2.84509	2.56292	2.30662	48.4391
		0.92427	3.12796	3.63399	3.07998	3.28064	68.8935		0.92427	2.96085	2.80989	3.31905	3.02993	2.72694	57.2657
		0.99029	2.7219	3.31967	3.15006	3.06388	64.3414		0.99029	3.22732	3.17023	3.52757	3.30837	2.97754	62.5283
		1.05631	2.41565	2.73131	2.38363	2.5102	52.7141		1.05631	3.29581	3.00337	3.2204	3.17319	2.85587	59.9734
		1.12232	1.81308	1.95391	1.72345	1.83015	38.4331		1.12232	3.12526	2.05823	2.88466	2.68938	2.42044	50.8293
		1.18834	1.72185	1.83034	1.57952	1.71057	35.922		1.18834	2.44872	1.45771	2.21451	2.04031	1.83628	38.5619
		1.25436	1.49756	1.43486	1.31841	1.41694	29.7558		1.25436	2.00949	1.51226	2.01789	1.84655	1.66189	34.8997
		1.32038	1.66519	1.44126	1.17468	1.42704	29.9679		1.32038	1.44066	1.11379	1.53631	1.36359	1.22723	25.7718
		1.3864	1.697	1.43335	1.36188	1.49741	31.4456		1.3864	1.54502	1.20145	1.4548	1.40042	1.26038	26.468
		1.45242	1.65675	1.21097	1.34393	1.40388	29.4816		1.45242	1.60215	1.37295	1.36037	1.44516	1.30064	27.3135
		1.51844	1.49424	1.19101	1.62675	1.43733	30.184		1.51844	2.07584	1.41289	1.40673	1.63182	1.46864	30.8414
		1.58446	1.58227	1.15931	1.57301	1.4382	30.2021		1.58446	3.02088	1.64558	1.47945	2.04864	1.84377	38.7192
		1.65048	2.20271	1.2696	1.72298	1.73176	36.367		1.65048	3.70101	1.80262	1.75919	2.42094	2.17885	45.7558
		1.7165	2.38557	1.80172	2.11593	2.10107	44.1225		1.7165	3.50421	2.62167	2.38097	2.83562	2.55206	53.5932
		1.78252	2.7459	2.47652	2.9779	2.73344	57.4022		1.78252	3.21398	3.57232	2.98054	3.25561	2.93005	61.5311
		1.84853	2.69385	3.24175	3.15852	3.03137	63.6588		1.84853	2.30294	3.80477	3.73222	3.27998	2.95198	61.9916
		1.91455	2.26805	3.5803	3.30955	3.05263	64.1053		1.91455	1.19451	3.70214	3.85476	2.91714	2.62542	55.1339
		1.98057	1.96542	3.01982	3.03949	2.67491	56.1731		1.98057	0.40611	2.84106	2.94775	2.06497	1.85848	39.028
		2.04659	1.75214	2.64069	2.23621	2.20968	46.4033		2.04659	0.06931	1.74838	1.84098	1.21956	1.0976	23.0496
		2.11261	1.74696	2.14914	1.79605	1.89738	39.8451		2.11261	0.02649	0.65671	0.81492	0.499373	0.449436	9.43816
		2.17863	1.62223	1.73596	1.61177	1.65665	34.7897		2.17863	0	0.3108	0.20321	0.171337	0.154203	3.23826
		2.24465	1.52908	1.51122	1.60979	1.55003	32.5506		2.24465	0	0.12651	0.09678	0.07443	0.066987	1.40673
		2.31067	1.40258	1.46639	1.49504	1.45467	30.5481		2.31067	9e-05	0.04438	0.04558	0.0300167	0.027015	0.567315
		2.37669	1.18553	1.31159	1.56766	1.35493	28.4535		2.37669	0.02409	0.04757	0.01967	0.0304433	0.027399	0.575379
		2.44271	1.17779	1.27783	1.33215	1.26259	26.5144		2.44271	0.02479	0.1093	0.01872	0.0509367	0.045843	0.962703
		2.50873	0.9028	1.14832	1.36048	1.1372	23.8812		2.50873	0.08925	0.04752	0.06671	0.0678267	0.061044	1.28192
		2.57474	0.94624	0.87299	1.03983	0.95302	20.0134		2.57474	0.06278	0.13962	0.02829	0.0768967	0.069207	1.45335
		2.64076	0.8421	0.7508	1.01806	0.87032	18.2767		2.64076	0.06312	0.09742	0.04984	0.0701267	0.063114	1.32539
		2.70678	0.79014	0.64487	0.96263	0.799213	16.7835		2.70678	0.05406	0.15721	0.01165	0.0743067	0.066876	1.4044
		2.7728	0.86565	0.57424	0.74702	0.72897	15.3084		2.7728	0.00827	0.13777	0.00422	0.0500867	0.045078	0.946638
		image009
		red channel (mCh-sec-10)	measurements				multiply to fit to y-axis		yellow channel (par-3-zf1-yfp)	measurements					multiply to fit to y-axis
		distance (microns)	m1	m2	m3	avg	*21		distance (microns)	m1	m2	m3	avg	normalized to red channel	*21
		0	1.54976	1.20733	1.27015	1.34241	28.1907		0	0	0.04601	0.05957	0.0351933	0.031674	0.665154
		0.06602	1.28343	1.30834	1.45361	1.34846	28.3177		0.06602	0.02006	0.02224	0.03992	0.0274067	0.024666	0.517986
		0.13204	1.40163	1.34956	1.65447	1.46855	30.8396		0.13204	0.01753	0.02262	0.02952	0.0232233	0.020901	0.438921
		0.19806	1.46382	1.30781	1.75136	1.50766	31.6609		0.19806	0.03837	0.03827	0.02521	0.03395	0.030555	0.641655
		0.26408	1.48386	1.18988	1.72205	1.46526	30.7705		0.26408	0.02148	0.1181	0.07543	0.07167	0.064503	1.35456
		0.3301	1.46319	1.32588	1.79987	1.52965	32.1226		0.3301	0.03728	0.05664	0.08782	0.06058	0.054522	1.14496
		0.39611	1.40122	1.20489	1.6571	1.42107	29.8425		0.39611	0.09958	0.00166	0.1034	0.0682133	0.061392	1.28923
		0.46213	1.39998	1.52112	1.54504	1.48871	31.263		0.46213	0.05929	0.06336	0.05571	0.0594533	0.053508	1.12367
		0.52815	1.52618	1.70934	1.83415	1.68989	35.4877		0.52815	0.18329	0.1642	0.27247	0.206653	0.185988	3.90575
		0.59417	1.49613	1.7201	2.01164	1.74262	36.5951		0.59417	0.26754	0.34227	0.48326	0.364357	0.327921	6.88634
		0.66019	1.79347	2.02097	2.51565	2.11003	44.3106		0.66019	0.52302	0.66457	0.95458	0.714057	0.642651	13.4957
		0.72621	2.46875	2.26988	2.84719	2.52861	53.1007		0.72621	1.24032	1.52745	2.14555	1.63777	1.474	30.9539
		0.79223	3.01826	2.43458	2.94905	2.80063	58.8132		0.79223	2.18392	2.40448	3.0433	2.5439	2.28951	48.0797
		0.85825	3.49908	2.80807	2.86232	3.05649	64.1863		0.85825	3.47826	3.4876	3.58083	3.51556	3.16401	66.4441
		0.92427	4.69023	3.10236	2.73853	3.51037	73.7178		0.92427	4.56171	4.43468	3.85963	4.28534	3.85681	80.9929
		0.99029	4.9215	3.11282	2.38045	3.47159	72.9034		0.99029	4.75154	4.69196	3.80331	4.4156	3.97404	83.4549
		1.05631	4.48701	2.72375	2.13897	3.11658	65.4481		1.05631	4.409	4.32344	2.93941	3.89062	3.50156	73.5327
		1.12232	3.61717	2.29443	2.00007	2.63722	55.3817		1.12232	3.79865	3.82012	2.44528	3.35468	3.01921	63.4035
		1.18834	3.34714	2.01648	1.6957	2.35311	49.4152		1.18834	2.7047	3.19467	2.1891	2.69616	2.42654	50.9574
		1.25436	2.83091	1.81576	1.61349	2.08672	43.8211		1.25436	2.11997	2.62788	1.8859	2.21125	1.99012	41.7926
		1.32038	2.28615	1.79854	1.48356	1.85608	38.9778		1.32038	1.99199	2.44287	1.7214	2.05209	1.84688	38.7844
		1.3864	1.76721	1.55456	1.59055	1.63744	34.3862		1.3864	1.93795	2.25885	1.70101	1.96594	1.76934	37.1562
		1.45242	1.81871	1.70874	1.60344	1.7103	35.9162		1.45242	2.45331	2.219	1.70986	2.12739	1.91465	40.2077
		1.51844	1.94359	1.67956	1.6134	1.74552	36.6558		1.51844	2.95908	2.65545	2.17569	2.59674	2.33707	49.0784
		1.58446	1.83625	1.67072	1.66745	1.72481	36.2209		1.58446	3.1001	3.18006	2.82652	3.03556	2.732	57.3721
		1.65048	2.07794	2.05295	2.19215	2.10768	44.2613		1.65048	3.48565	4.14657	3.57619	3.73614	3.36252	70.613
		1.7165	2.52013	2.54956	2.53675	2.53548	53.2451		1.7165	4.19934	4.87305	4.27171	4.44803	4.00323	84.0678
		1.78252	3.13836	2.8744	3.09706	3.03661	63.7687		1.78252	4.49097	4.74506	5.04903	4.76169	4.28552	89.9959
		1.84853	3.72734	3.04614	3.02651	3.26666	68.5999		1.84853	4.57357	4.05577	4.27489	4.30141	3.87127	81.2966
		1.91455	3.55888	2.8324	2.73245	3.04124	63.8661		1.91455	3.53396	2.94182	3.53607	3.33728	3.00356	63.0747
		1.98057	2.84563	2.61416	2.53802	2.66594	55.9847		1.98057	2.27369	1.72987	2.59611	2.19989	1.9799	41.5779
		2.04659	2.22818	2.17086	2.28183	2.22696	46.7661		2.04659	0.98986	0.60748	1.37869	0.99201	0.892809	18.749
		2.11261	1.96105	1.92355	2.08971	1.99144	41.8202		2.11261	0.3354	0.11523	0.52899	0.32654	0.293886	6.17161
		2.17863	1.81272	1.76456	2.00713	1.86147	39.0909		2.17863	0.10737	0.08014	0.11534	0.10095	0.090855	1.90796
		2.24465	1.50425	1.90795	2.06082	1.82434	38.3111		2.24465	0.05486	7e-05	0.08299	0.0459733	0.041376	0.868896
		2.31067	1.86141	1.7817	1.82968	1.82426	38.3095		2.31067	0.02249	0	0.06162	0.0280367	0.025233	0.529893
		2.37669	1.91511	1.89481	1.91818	1.90937	40.0967		2.37669	0.02315	0	0.03928	0.02081	0.018729	0.393309
		2.44271	1.89109	1.62445	1.98754	1.83436	38.5216		2.44271	0.02818	0.02805	0.02263	0.0262867	0.023658	0.496818
		2.50873	2.12782	1.46073	2.18037	1.92297	40.3824		2.50873	0.06443	0.00695	0.05239	0.0412567	0.037131	0.779751
		2.57474	2.27191	1.22528	1.95363	1.81694	38.1557		2.57474	0.0684	0.08502	0.06422	0.0725467	0.065292	1.37113
		2.64076	2.45504	1.06384	1.75039	1.75642	36.8849		2.64076	0.03696	0.09711	0.04866	0.06091	0.054819	1.1512
		2.70678	2.21505	0.86374	1.69537	1.59139	33.4191		2.70678	0.07148	0.12098	0.10126	0.0979067	0.088116	1.85044
		2.7728	1.6693	0.87503	1.57314	1.37249	28.8223		2.7728	0.08355	0.08538	0.04115	0.0700267	0.063024	1.3235

## Sheet: Figure 5J - source data
		Figure 5J - source data. Fluorescent intensity values for line trace measurements of PAR-3::ZF1::YFP; mCherry::SEC-10 (heat shock ZIF-1)
		par-3(xn59); xnIs485; xnEx528[hsp-16.41p::zif-1; t28h11.8p::CFP, pRF4] heat shock ZIF-1 D6 12122018
		image011
		red channel (mCh-sec-10)	measurements				multiply to fit to y-axis		yellow channel (par-3-zf1-yfp)	measurements					multiply to fit to y-axis
		distance (microns)	m1	m2	m3	avg	*21		distance (microns)	m1	m2	m3	avg	normalized to red channel	*21
		0	1.81593	0.94494	1.43488	1.39858	29.3703		0	0	0.037351	0	0.0124503	0.0112053	0.235311
		0.06602	1.77139	0.88994	1.34208	1.33447	28.0239		0.06602	0	0.013032	0	0.004344	0.0039096	0.0821016
		0.13204	1.69252	0.9608	1.25229	1.30187	27.3393		0.13204	0	0	0	0	0	0
		0.19806	1.77963	0.94201	1.21527	1.3123	27.5584		0.19806	0	0	0	0	0	0
		0.26408	1.6756	1.02364	1.36242	1.35389	28.4316		0.26408	0	0	0	0	0	0
		0.3301	1.98952	0.93746	1.53457	1.48718	31.2309		0.3301	0.0007179	0	0	0.0002393	0.00021537	0.00452277
		0.39611	2.33622	1.0339	1.67603	1.68205	35.3231		0.39611	0.0301174	0	0	0.0100391	0.00903522	0.18974
		0.46213	1.91991	1.1835	1.51999	1.54113	32.3638		0.46213	0.003407	0	0	0.00113567	0.0010221	0.0214641
		0.52815	2.20698	1.06009	1.4814	1.58282	33.2393		0.52815	0	0	0	0	0	0
		0.59417	2.47632	1.514	1.38709	1.79247	37.6419		0.59417	0	0	0	0	0	0
		0.66019	2.73969	2.04822	1.827	2.20497	46.3044		0.66019	0	0	0	0	0	0
		0.72621	2.66303	2.5651	2.6905	2.63954	55.4304		0.72621	0	0	0	0	0	0
		0.79223	3.12166	2.63745	3.53982	3.09964	65.0925		0.79223	0	0	0	0	0	0
		0.85825	3.58466	2.74542	3.26645	3.19884	67.1757		0.85825	0.019452	0	0	0.006484	0.0058356	0.122548
		0.92427	3.93611	2.29055	2.62286	2.94984	61.9466		0.92427	0.06666	0	0	0.02222	0.019998	0.419958
		0.99029	3.53406	1.71974	1.88559	2.3798	49.9757		0.99029	0.0145846	0	0	0.00486153	0.00437538	0.091883
		1.05631	2.87818	1.63278	1.2522	1.92105	40.3421		1.05631	0	9e-06	0	3e-06	2.7e-06	5.67e-05
		1.12232	1.82438	1.27243	0.9534	1.35007	28.3515		1.12232	0	0	0	0	0	0
		1.18834	1.48847	1.22131	0.9562	1.22199	25.6619		1.18834	0	0.025773	0	0.008591	0.0077319	0.16237
		1.25436	1.25928	0.94224	0.94244	1.04799	22.0077		1.25436	0	0.037229	0	0.0124097	0.0111687	0.234543
		1.32038	1.29527	1.01016	0.81426	1.0399	21.8378		1.32038	0	0.002164	0.0033106	0.00182487	0.00164238	0.03449
		1.3864	1.28634	0.82417	0.69144	0.933983	19.6136		1.3864	0	0	0.0304063	0.0101354	0.00912189	0.19156
		1.45242	1.41451	0.84224	0.86693	1.04123	21.8658		1.45242	0	0.010216	0	0.00340533	0.0030648	0.0643608
		1.51844	1.40036	1.08701	0.97847	1.15528	24.2609		1.51844	0	0.023711	0	0.00790367	0.0071133	0.149379
		1.58446	1.58849	1.22506	0.92734	1.24696	26.1862		1.58446	0	0	0	0	0	0
		1.65048	1.57512	1.64244	1.07714	1.43157	30.0629		1.65048	0	0	0	0	0	0
		1.7165	2.20329	1.99475	1.72947	1.97584	41.4926		1.7165	0	0.001563	0	0.000521	0.0004689	0.0098469
		1.78252	2.81838	2.41968	2.45629	2.56478	53.8605		1.78252	0.0001544	0.073759	0	0.0246378	0.022174	0.465654
		1.84853	3.6733	2.48027	3.00361	3.05239	64.1003		1.84853	0.026194	0.106969	0	0.0443877	0.0399489	0.838927
		1.91455	3.91359	2.40308	3.25114	3.18927	66.9747		1.91455	0.0061568	0.093772	0	0.0333096	0.0299786	0.629551
		1.98057	3.64319	2.13239	2.66886	2.81481	59.1111		1.98057	0	0.022679	0	0.00755967	0.0068037	0.142878
		2.04659	3.09579	1.78375	2.16777	2.3491	49.3312		2.04659	0	0	0	0	0	0
		2.11261	2.52928	1.18607	1.76367	1.82634	38.3531		2.11261	0	0	0	0	0	0
		2.17863	2.33031	0.93449	1.56238	1.60906	33.7903		2.17863	0	0	0	0	0	0
		2.24465	1.75203	0.91087	1.46684	1.37658	28.9082		2.24465	0	0	0	0	0	0
		2.31067	1.684	0.54067	1.65379	1.29282	27.1492		2.31067	0	0	0	0	0	0
		2.37669	1.56494	0.53458	1.3762	1.15857	24.33		2.37669	0	0	0.0043769	0.00145897	0.00131307	0.0275745
		2.44271	1.58271	0.41036	0.92229	0.971787	20.4075		2.44271	0.0020972	0	0.0019257	0.00134097	0.00120687	0.0253443
		2.50873	1.20845	0.30916	0.78135	0.76632	16.0927		2.50873	0.0331397	0	0	0.0110466	0.00994191	0.20878
		2.57474	0.93808	0.22964	0.74658	0.6381	13.4001		2.57474	0.0324274	0	0.0244301	0.0189525	0.0170572	0.358202
		2.64076	0.63608	0.1588	0.7184	0.504427	10.593		2.64076	0.0350783	0	0.0081685	0.0144156	0.012974	0.272455
		2.70678	0.58346	0.14066	0.68309	0.46907	9.85047		2.70678	0.0037155	0	0	0.0012385	0.00111465	0.0234077
		2.7728	0.77666	0.07283	0.56393	0.47114	9.89394		2.7728	0	0	0	0	0	0
		image013
		red channel (mCh-sec-10)	measurements				multiply to fit to y-axis		yellow channel (par-3-zf1-yfp)	measurements					multiply to fit to y-axis
		distance (microns)	m1	m2	m3	avg	*21		distance (microns)	m1	m2	m3	avg	normalized to red channel	*21
		0	0.68026	0.74792	0.7254	0.71786	15.0751		0	0	0.00162066	0	0.00054022	0.000486198	0.0102102
		0.06602	0.65598	0.82932	0.7831	0.756133	15.8788		0.06602	0	0	0	0	0	0
		0.13204	0.65573	0.95632	0.63074	0.747597	15.6995		0.13204	0	0	0	0	0	0
		0.19806	0.35254	0.97781	0.70379	0.678047	14.239		0.19806	0	0	0	0	0	0
		0.26408	0.48399	0.93468	0.55798	0.658883	13.8365		0.26408	0	0	0	0	0	0
		0.3301	0.62253	0.775	0.59157	0.663033	13.9237		0.3301	0	0	0.0216884	0.00722947	0.00650652	0.136637
		0.39611	0.68609	0.66921	0.59456	0.649953	13.649		0.39611	0	0	0.0132368	0.00441227	0.00397104	0.0833918
		0.46213	0.55787	0.5813	0.81503	0.6514	13.6794		0.46213	0	0.00264411	0	0.00088137	0.000793233	0.0166579
		0.52815	0.6819	0.53123	0.73325	0.648793	13.6247		0.52815	0	0	0	0	0	0
		0.59417	0.60888	0.54277	0.63296	0.59487	12.4923		0.59417	0	0	0	0	0	0
		0.66019	0.57653	0.84476	0.80331	0.741533	15.5722		0.66019	0	0	0	0	0	0
		0.72621	0.71536	0.76598	0.78544	0.755593	15.8675		0.72621	0	0	0	0	0	0
		0.79223	1.0356	0.87455	0.88456	0.93157	19.563		0.79223	0	0	0	0	0	0
		0.85825	1.29297	0.91941	1.27624	1.16287	24.4203		0.85825	0	0	0	0	0	0
		0.92427	1.58485	1.12816	1.62619	1.4464	30.3744		0.92427	0	0	0	0	0	0
		0.99029	1.31779	1.49479	1.74975	1.52078	31.9363		0.99029	0	0	0	0	0	0
		1.05631	1.33291	1.37628	1.41351	1.37423	28.8589		1.05631	0	0	0	0	0	0
		1.12232	1.24193	1.10992	1.1557	1.16918	24.5528		1.12232	0	0	0	0	0	0
		1.18834	1.00011	1.0402	0.9506	0.99697	20.9364		1.18834	0	0	0	0	0	0
		1.25436	0.65347	0.7537	0.61439	0.673853	14.1509		1.25436	0	0	0	0	0	0
		1.32038	0.66873	0.67869	0.60571	0.651043	13.6719		1.32038	0	0	0	0	0	0
		1.3864	0.63916	0.57869	0.76475	0.660867	13.8782		1.3864	0	0	0	0	0	0
		1.45242	0.63772	0.64356	0.65484	0.645373	13.5528		1.45242	0	0	0	0	0	0
		1.51844	0.66055	0.78523	0.83338	0.75972	15.9541		1.51844	0	0	0	0	0	0
		1.58446	0.73914	0.72505	0.89603	0.78674	16.5215		1.58446	0	0	0	0	0	0
		1.65048	0.96082	0.79015	0.8542	0.86839	18.2362		1.65048	0	0	0	0	0	0
		1.7165	1.07974	0.98773	1.15951	1.07566	22.5889		1.7165	0	0	0	0	0	0
		1.78252	1.11811	1.14936	1.39206	1.21984	25.6167		1.78252	0	0	0	0	0	0
		1.84853	1.34674	1.43706	1.54884	1.44421	30.3285		1.84853	0.0293762	0	0	0.00979207	0.00881286	0.18507
		1.91455	1.61299	1.50172	1.81643	1.64371	34.518		1.91455	0.0039498	0	0	0.0013166	0.00118494	0.0248837
		1.98057	1.62878	1.43417	1.85639	1.63978	34.4354		1.98057	0	0	0	0	0	0
		2.04659	1.65274	1.00024	1.81664	1.48987	31.2873		2.04659	0.0013817	0	0	0.000460567	0.00041451	0.00870471
		2.11261	1.62903	0.73261	1.62876	1.33013	27.9328		2.11261	0.0283313	0	0	0.00944377	0.00849939	0.178487
		2.17863	1.47516	0.85133	1.41224	1.24624	26.1711		2.17863	0	0	0	0	0	0
		2.24465	1.19229	0.72176	1.28591	1.06665	22.3997		2.24465	0.0013528	0	0	0.000450933	0.00040584	0.00852264
		2.31067	1.01811	0.58581	1.1929	0.932273	19.5777		2.31067	0.0343596	0	0	0.0114532	0.0103079	0.216465
		2.37669	0.91489	0.52005	1.14485	0.85993	18.0585		2.37669	0.0036504	0	0	0.0012168	0.00109512	0.0229975
		2.44271	0.60252	0.41393	1.1264	0.714283	15		2.44271	0	0	0	0	0	0
		2.50873	0.65858	0.55564	1.00252	0.738913	15.5172		2.50873	0	0	0	0	0	0
		2.57474	0.49957	0.43843	1.06202	0.666673	14.0001		2.57474	0	0	0	0	0	0
		2.64076	0.50881	0.55262	0.90144	0.65429	13.7401		2.64076	0.0117318	0	0.0001646	0.00396547	0.00356892	0.0749473
		2.70678	0.5984	0.60789	1.03467	0.746987	15.6867		2.70678	0.0201662	0	0	0.00672207	0.00604986	0.127047
		2.7728	0.59156	0.58601	1.07458	0.750717	15.7651		2.7728	0	0	0.0058841	0.00196137	0.00176523	0.0370698
		image009
		red channel (mCh-sec-10)	measurements				multiply to fit to y-axis		yellow channel (par-3-zf1-yfp)	measurements					multiply to fit to y-axis
		distance (microns)	m1	m2	m3	avg	*21		distance (microns)	m1	m2	m3	avg	normalized to red channel	*21
		0	1.06158	1.22992	0.53672	0.94274	19.7975		0	0.001821	0	0	0.000607	0.0005463	0.0114723
		0.06602	0.92694	1.24737	0.58718	0.920497	19.3304		0.06602	0.0204118	0.0065277	0	0.00897983	0.00808185	0.169719
		0.13204	0.97982	1.08831	0.69472	0.92095	19.34		0.13204	0	0.0272507	0	0.00908357	0.00817521	0.171679
		0.19806	1.06555	1.07398	0.68874	0.942757	19.7979		0.19806	0	0.0001743	0.0131984	0.00445757	0.00401181	0.084248
		0.26408	1.06165	0.94927	0.71369	0.908203	19.0723		0.26408	0	0	0.0202492	0.00674973	0.00607476	0.12757
		0.3301	0.99033	0.85617	0.80908	0.885193	18.5891		0.3301	0	0	0	0	0	0
		0.39611	1.14494	0.85005	0.81913	0.93804	19.6988		0.39611	0	0	0	0	0	0
		0.46213	1.31619	1.06347	0.81586	1.06517	22.3686		0.46213	0	0.0105052	0	0.00350173	0.00315156	0.0661828
		0.52815	1.45188	1.06207	0.78815	1.1007	23.1147		0.52815	0	0.0232694	0	0.00775647	0.00698082	0.146597
		0.59417	1.2172	1.16764	0.82665	1.0705	22.4804		0.59417	0	0	0	0	0	0
		0.66019	1.30099	1.07336	0.92233	1.09889	23.0768		0.66019	0	0	0	0	0	0
		0.72621	1.34003	1.28338	1.36882	1.33074	27.9456		0.72621	0	0	0	0	0	0
		0.79223	1.90701	1.61566	1.10958	1.54408	32.4258		0.79223	0	0	0	0	0	0
		0.85825	2.1291	2.12041	1.38545	1.87832	39.4447		0.85825	0	0	0	0	0	0
		0.92427	2.56435	2.42183	1.96137	2.31585	48.6328		0.92427	0	0	0.0172783	0.00575943	0.00518349	0.108853
		0.99029	3.20988	2.65273	2.45995	2.77419	58.2579		0.99029	0.0272292	0	0.0177229	0.014984	0.0134856	0.283198
		1.05631	2.96729	2.2237	2.31267	2.50122	52.5256		1.05631	0.0390245	0	0.0321345	0.0237197	0.0213477	0.448302
		1.12232	2.522	1.72408	2.14024	2.12877	44.7042		1.12232	0	0	0.0542367	0.0180789	0.016271	0.341691
		1.18834	1.92443	1.26414	1.45565	1.54807	32.5095		1.18834	0	0	0.0073417	0.00244723	0.00220251	0.0462527
		1.25436	1.25273	1.19248	1.15243	1.19921	25.1835		1.25436	0	0	0	0	0	0
		1.32038	1.36723	0.94644	1.11966	1.14444	24.0333		1.32038	0	0	0	0	0	0
		1.3864	1.13606	0.94846	1.22666	1.10373	23.1783		1.3864	0	0.0031831	0	0.00106103	0.00095493	0.0200535
		1.45242	1.13366	0.97665	1.15615	1.08882	22.8652		1.45242	0.0021158	0.0291034	0	0.0104064	0.00936576	0.196681
		1.51844	1.21823	0.88335	1.17409	1.09189	22.9297		1.51844	0.0305169	0.0550145	0	0.0285105	0.0256594	0.538848
		1.58446	0.88766	1.04082	1.16366	1.03071	21.645		1.58446	0.0238021	0.013309	0.0180809	0.0183973	0.0165576	0.34771
		1.65048	1.28665	1.15603	1.45599	1.29956	27.2907		1.65048	0.0452046	0	0.0153695	0.0201914	0.0181722	0.381617
		1.7165	1.49536	1.52522	1.58594	1.53551	32.2456		1.7165	0.0316494	0	0	0.0105498	0.00949482	0.199391
		1.78252	1.68656	1.93064	2.1092	1.9088	40.0848		1.78252	0.0011632	0	0	0.000387733	0.00034896	0.00732816
		1.84853	2.18983	2.61963	2.02055	2.27667	47.8101		1.84853	0	0	0	0	0	0
		1.91455	2.50833	2.71915	2.65581	2.62776	55.183		1.91455	0	0	0	0	0	0
		1.98057	2.47902	2.509	2.51386	2.50063	52.5132		1.98057	0	0	0	0	0	0
		2.04659	1.96682	2.18346	2.03175	2.06068	43.2742		2.04659	0	0	0	0	0	0
		2.11261	1.70302	1.89117	1.40725	1.66715	35.0101		2.11261	0	0	0	0	0	0
		2.17863	1.36848	1.37082	1.25488	1.33139	27.9593		2.17863	0	0	0	0	0	0
		2.24465	1.0165	1.1903	1.02771	1.07817	22.6416		2.24465	0	0	0	0	0	0
		2.31067	0.875	0.86775	1.12516	0.95597	20.0754		2.31067	0	0	0	0	0	0
		2.37669	0.89829	0.75556	0.94875	0.867533	18.2182		2.37669	0	0	0	0	0	0
		2.44271	0.98116	0.75684	1.09346	0.94382	19.8202		2.44271	0	0	0	0	0	0
		2.50873	0.85527	0.74815	1.05807	0.887163	18.6304		2.50873	0	0	0	0	0	0
		2.57474	0.65045	0.69378	0.78735	0.710527	14.9211		2.57474	0.0028562	0	0	0.000952067	0.00085686	0.0179941
		2.64076	0.54508	0.47025	0.83741	0.61758	12.9692		2.64076	0.0342511	0	0	0.011417	0.0102753	0.215782
		2.70678	0.38453	0.48656	1.06137	0.644153	13.5272		2.70678	0.0004208	0.0003573	0	0.000259367	0.00023343	0.00490203
		2.7728	0.44887	0.52024	1.07223	0.680447	14.2894		2.7728	0	0.0283397	0	0.00944657	0.00850191	0.17854
		image008
		red channel (mCh-sec-10)	measurements				multiply to fit to y-axis		yellow channel (par-3-zf1-yfp)	measurements					multiply to fit to y-axis
		distance (microns)	m1	m2	m3	avg	*21		distance (microns)	m1	m2	m3	avg	normalized to red channel	*21
		0	0.59349	0.40134	0.8006	0.598477	12.568		0	0.121383	0	0.190712	0.104032	0.0936285	1.9662
		0.06602	0.63336	0.47472	0.95249	0.686857	14.424		0.06602	0.055518	0	0.137212	0.0642433	0.057819	1.2142
		0.13204	0.69435	0.45123	0.94919	0.698257	14.6634		0.13204	0.035212	0	0.164396	0.066536	0.0598824	1.25753
		0.19806	0.89456	0.46961	1.08194	0.81537	17.1228		0.19806	0.241864	0	0.315238	0.185701	0.167131	3.50974
		0.26408	1.08971	0.48138	1.35263	0.974573	20.466		0.26408	0.157774	0	0.339565	0.16578	0.149202	3.13324
		0.3301	1.02805	0.52868	1.45962	1.00545	21.1144		0.3301	0.151824	0	0.302461	0.151428	0.136285	2.862
		0.39611	1.02491	0.78016	1.60273	1.13593	23.8546		0.39611	0.0795	0.021224	0.196278	0.0990007	0.0891006	1.87111
		0.46213	1.25489	0.82406	1.74588	1.27494	26.7738		0.46213	0.031228	0.014284	0.104583	0.0500317	0.0450285	0.945599
		0.52815	1.45239	0.79197	2.03829	1.42755	29.9786		0.52815	0.047126	0	0.124953	0.0573597	0.0516237	1.0841
		0.59417	1.66051	0.89369	2.0793	1.5445	32.4345		0.59417	0.035673	0	0.089632	0.0417683	0.0375915	0.789421
		0.66019	1.59015	1.13006	2.05419	1.59147	33.4208		0.66019	0.114932	0	0.140705	0.0852123	0.0766911	1.61051
		0.72621	1.90607	1.66544	2.07832	1.88328	39.5488		0.72621	0.047976	0.001775	0.138484	0.062745	0.0564705	1.18588
		0.79223	2.07353	1.91717	2.26931	2.08667	43.8201		0.79223	0	0.046589	0.030721	0.02577	0.023193	0.487053
		0.85825	2.08449	2.22274	2.32189	2.20971	46.4038		0.85825	0.021135	0.101842	0.028912	0.0506297	0.0455667	0.956901
		0.92427	2.24621	1.89709	2.39172	2.17834	45.7451		0.92427	0.033432	0.044838	0.025917	0.034729	0.0312561	0.656378
		0.99029	2.03713	1.69214	2.28967	2.00631	42.1326		0.99029	0.072598	0	0.055327	0.0426417	0.0383775	0.805928
		1.05631	1.43699	1.22666	1.62674	1.43013	30.0327		1.05631	0.006001	0	0.026891	0.010964	0.0098676	0.20722
		1.12232	1.11851	0.82286	1.10791	1.01643	21.345		1.12232	0	0	0.000306	0.000102	9.18e-05	0.0019278
		1.18834	0.9709	0.76093	0.84853	0.86012	18.0625		1.18834	0	0	0	0	0	0
		1.25436	0.82214	0.56758	0.84364	0.744453	15.6335		1.25436	0	0	0	0	0	0
		1.32038	0.5468	0.53103	0.55055	0.542793	11.3987		1.32038	0	0	0	0	0	0
		1.3864	0.54838	0.55763	0.62334	0.57645	12.1055		1.3864	0	0	0	0	0	0
		1.45242	0.65947	0.59117	0.59625	0.61563	12.9282		1.45242	0	0	0	0	0	0
		1.51844	0.64796	0.6495	0.6613	0.65292	13.7113		1.51844	0	0	0	0	0	0
		1.58446	0.93811	0.58863	0.95946	0.828733	17.4034		1.58446	0	0.003365	0	0.00112167	0.0010095	0.0211995
		1.65048	0.96269	0.60108	0.90004	0.82127	17.2467		1.65048	0	0.0352	0	0.0117333	0.01056	0.22176
		1.7165	1.0623	0.71814	0.93509	0.905177	19.0087		1.7165	0	0.001649	0	0.000549667	0.0004947	0.0103887
		1.78252	1.2622	0.96723	1.27008	1.1665	24.4966		1.78252	0	0.034713	0	0.011571	0.0104139	0.218692
		1.84853	1.52923	1.15863	1.41889	1.36892	28.7472		1.84853	0	0.03475	0	0.0115833	0.010425	0.218925
		1.91455	2.11631	1.74177	1.78141	1.87983	39.4764		1.91455	0	0.046033	0	0.0153443	0.0138099	0.290008
		1.98057	2.44913	2.23221	2.19664	2.29266	48.1459		1.98057	0	0.015489	0	0.005163	0.0046467	0.0975807
		2.04659	2.24002	1.81091	2.59177	2.21423	46.4989		2.04659	0.021147	0.015589	0	0.0122453	0.0110208	0.231437
		2.11261	2.0287	1.56294	2.35762	1.98309	41.6448		2.11261	0.013653	0.0173	0.029939	0.0202973	0.0182676	0.38362
		2.17863	1.49519	1.03098	2.05432	1.52683	32.0634		2.17863	0	0	0.00592	0.00197333	0.001776	0.037296
		2.24465	1.07863	0.83881	1.42252	1.11332	23.3797		2.24465	0	0	0	0	0	0
		2.31067	0.90989	0.4751	1.02246	0.802483	16.8521		2.31067	0	0	0	0	0	0
		2.37669	0.89373	0.55008	1.09938	0.84773	17.8023		2.37669	0	0	0	0	0	0
		2.44271	0.77813	0.7252	0.77501	0.759447	15.9484		2.44271	0	0	0	0	0	0
		2.50873	0.84414	0.67685	0.67299	0.731327	15.3579		2.50873	0	0	0	0	0	0
		2.57474	0.86578	0.66577	0.6606	0.730717	15.345		2.57474	0	0	0.008781	0.002927	0.0026343	0.0553203
		2.64076	0.78624	0.83674	0.60599	0.74299	15.6028		2.64076	0	0	0.023151	0.007717	0.0069453	0.145851
		2.70678	0.96945	1.00775	0.58652	0.854573	17.946		2.70678	0	0	0	0	0	0
		2.7728	0.91036	1.00655	0.44989	0.788933	16.5676		2.7728	0.002011	0.0238	0	0.00860367	0.0077433	0.162609
		image001
		red channel (mCh-sec-10)	measurements				multiply to fit to y-axis		yellow channel (par-3-zf1-yfp)	measurements					multiply to fit to y-axis
		distance (microns)	m1	m2	m3	avg	*21		distance (microns)	m1	m2	m3	avg	normalized to red channel	*21
		0	1.74676	2.21094	2.14831	2.03534	42.7421		0	0.0048896	0.043171	0	0.0160202	0.0144182	0.302782
		0.06602	1.72842	2.03618	1.95373	1.90611	40.0283		0.06602	0	0.036805	0.02712	0.0213083	0.0191775	0.402728
		0.13204	1.84146	1.93038	1.70987	1.82724	38.372		0.13204	0	0.004732	0.008144	0.004292	0.0038628	0.0811188
		0.19806	2.29339	1.85076	1.51001	1.88472	39.5791		0.19806	0.0050909	0	0.033047	0.0127126	0.0114414	0.240269
		0.26408	2.46131	1.48318	1.35824	1.76758	37.1191		0.26408	0	0	0	0	0	0
		0.3301	2.5261	1.49741	1.80361	1.94237	40.7898		0.3301	0	0	0	0	0	0
		0.39611	2.48709	1.43838	1.617	1.84749	38.7973		0.39611	0.0275751	0	0	0.0091917	0.00827253	0.173723
		0.46213	2.24479	1.39916	1.9125	1.85215	38.8952		0.46213	0.0055477	0	0	0.00184923	0.00166431	0.0349505
		0.52815	1.85358	1.30672	1.85081	1.67037	35.0778		0.52815	0	0.028044	0	0.009348	0.0084132	0.176677
		0.59417	1.90479	1.37134	2.31366	1.86326	39.1285		0.59417	0	0.039601	0	0.0132003	0.0118803	0.249486
		0.66019	2.36707	1.58769	2.89035	2.2817	47.9158		0.66019	0	0	0	0	0	0
		0.72621	2.48471	1.8023	3.44357	2.57686	54.1141		0.72621	0	0.0116	0	0.00386667	0.00348	0.07308
		0.79223	3.07853	2.59124	4.2071	3.29229	69.1381		0.79223	0	0.056524	0	0.0188413	0.0169572	0.356101
		0.85825	3.80316	3.09186	4.03225	3.64242	76.4909		0.85825	0	0.001876	0.005047	0.00230767	0.0020769	0.0436149
		0.92427	4.30387	3.53932	3.8626	3.90193	81.9405		0.92427	0.0072885	0	0.037121	0.0148032	0.0133229	0.27978
		0.99029	4.36545	3.198	3.14277	3.56874	74.9435		0.99029	0.0257601	0.000252	0.054801	0.0269377	0.0242439	0.509123
		1.05631	3.35632	2.79786	2.68683	2.947	61.8871		1.05631	0	0.011021	0.100316	0.0371123	0.0334011	0.701423
		1.12232	2.43109	2.52523	1.99282	2.31638	48.644		1.12232	0	0.009258	0.126851	0.0453697	0.0408327	0.857487
		1.18834	1.81148	2.15422	2.04549	2.00373	42.0783		1.18834	0	0.082408	0.01122	0.0312093	0.0280884	0.589856
		1.25436	1.52305	2.0989	2.04277	1.88824	39.653		1.25436	0.0200467	0.105487	0	0.0418446	0.0376601	0.790862
		1.32038	1.20591	2.00098	2.16497	1.79062	37.603		1.32038	0.023138	0.082849	0.011262	0.039083	0.0351747	0.738669
		1.3864	1.11939	1.82832	1.82623	1.59131	33.4176		1.3864	0.0237573	0.028811	0.022313	0.0249604	0.0224644	0.471752
		1.45242	1.54875	1.94445	1.9374	1.8102	38.0142		1.45242	0	0.026203	0	0.00873433	0.0078609	0.165079
		1.51844	1.4447	1.93187	1.64533	1.67397	35.1533		1.51844	0.0059249	0.000181	0	0.0020353	0.00183177	0.0384672
		1.58446	1.76696	2.23962	1.70775	1.90478	40.0003		1.58446	0.0275837	0	0	0.00919457	0.00827511	0.173777
		1.65048	2.08991	2.80426	2.27349	2.38922	50.1736		1.65048	0	0	0	0	0	0
		1.7165	2.61923	3.55682	3.20358	3.12654	65.6574		1.7165	0	0.01515	0	0.00505	0.004545	0.095445
		1.78252	3.38123	4.11206	3.80087	3.76472	79.0591		1.78252	0	0.015514	0	0.00517133	0.0046542	0.0977382
		1.84853	3.7939	3.95981	4.61248	4.12206	86.5633		1.84853	0	0	0	0	0	0
		1.91455	3.80904	3.12951	5.01461	3.98439	83.6721		1.91455	0	0	0	0	0	0
		1.98057	3.75512	2.26126	3.76343	3.25994	68.4587		1.98057	0.0148242	0.009079	0	0.00796773	0.00717096	0.15059
		2.04659	3.52846	1.43222	2.89116	2.61728	54.9629		2.04659	0.006662	0.025365	0	0.0106757	0.0096081	0.20177
		2.11261	2.54733	1.10889	1.91859	1.85827	39.0237		2.11261	0.0190471	8.4e-05	0	0.00637703	0.00573933	0.120526
		2.17863	1.75165	1.22309	1.58283	1.51919	31.903		2.17863	0.0141775	0	0	0.00472583	0.00425325	0.0893183
		2.24465	1.63262	1.26695	1.48589	1.46182	30.6982		2.24465	0.0057026	0	0	0.00190087	0.00171078	0.0359264
		2.31067	1.37716	1.19403	1.56618	1.37912	28.9616		2.31067	0.0275334	0.025642	0	0.0177251	0.0159526	0.335005
		2.37669	1.42129	0.96077	1.33892	1.24033	26.0469		2.37669	0	0.00714	0	0.00238	0.002142	0.044982
		2.44271	1.593	1.16672	1.38694	1.38222	29.0266		2.44271	0	0.017247	0	0.005749	0.0051741	0.108656
		2.50873	1.76645	1.17896	1.26787	1.40443	29.493		2.50873	0.0256782	0.017199	0	0.0142924	0.0128632	0.270126
		2.57474	1.78927	1.02013	1.32506	1.37815	28.9412		2.57474	0.0077153	0	0.030346	0.0126871	0.0114184	0.239786
		2.64076	1.98912	0.89362	1.38744	1.42339	29.8913		2.64076	0	0	0.040957	0.0136523	0.0122871	0.258029
		2.70678	2.24762	0.76109	1.23734	1.41535	29.7224		2.70678	0.0050132	0.020397	0.016317	0.0139091	0.0125182	0.262881
		2.7728	2.70178	0.81679	0.84872	1.45576	30.571		2.7728	0.0286429	0.030603	0.015987	0.0250776	0.0225699	0.473967
