# Supplementary material for: A polarity pathway for exocyst-dependent intracellular tube extension
Source: eLife journal article supplement (doi:10.7554/elife.65169), 2021-03-09
Supplement: supp [file elife-65169-supp-v1.zip › elife_poa_e65169_Figure_5_source_data_2.xlsx]

## Sheet: Figure 5F - source data
	Figure 5F - source data. Fluorescent intensity values for lumenal membrane and cytoplasmic mCherry::SEC-10 measurements in PAR-6::ZF1::YFP (control vs heat shock ZIF-1)
		Replicate #1
		par-6(xn60); xnIs485; xnEx511[t28h11.8p::cfp, pRF4] control 120618								par-6(xn60); xnIs485[sec-10p::mCherry::sec-10]; xnEx508[hsp-16.41p::zif-1; t28h11.8p::CFP, pRF4] heat shock ZIF-1 array line C1 120618							par-6(xn60); xnIs485[sec-10p::mCherry::sec-10]; xnEx509[hsp-16.41p::zif-1; t28h11.8p::CFP, pRF4] heat shock array ZIF-1 line C3 120618							par-6(xn60); xnIs485[sec-10p::mCherry::sec-10]; xnEx510[hsp-16.41p::zif-1; t28h11.8p::CFP, pRF4] heat shock ZIF-1 array line A5 120618
		sample #	measurement #	lumen mean intensity	cytoplasm mean intensity		lumen/cytoplasm			sample #	measurement #	lumen mean intensity	cytoplasm mean intensity		lumen/cytoplasm		sample #	measurement #	lumen mean intensity	cytoplasm mean intensity		lumen/cytoplasm		sample #	measurement #	lumen mean intensity	cytoplasm mean intensity		lumen/cytoplasm
		L4 good	1	1.563	1.32		1.18409			L4 good	1	1.81	1.91		0.947644		image 004	1	2.018	1.91		1.05654		image 001	1	3.17	2.15		1.47442
			2	1.49	1.01		1.47525				2	1.43	1.41		1.01418			2	1.94	1.92		1.01042			2	2.86	2.21		1.29412
						average	1.32967							average	0.980914						average	1.03348						average	1.38427
		image 003	1	2.12	1.08		1.96296			image 002	1	2.11	1.74		1.21264		image 006	1	2.69	2.16		1.24537		image 002	1	3.63	3.28		1.10671
			2	2.18	1.05		2.07619				2	1.93	2.18		0.885321			2	2.84	2.95		0.962712			2	3.38	2.9		1.16552
						average	2.01958							average	1.04898						average	1.10404						average	1.13611
						larvae 1 average	1.67462							larvae 1 average:	1.01495						larvae 1 average	1.06876						larvae 1 average	1.26019
		image 004	1	1.93	1.16		1.66379			image 004	1	1.95	1.71		1.14035		image 009	1	2.32	2.24		1.03571		image 003	1	2.63	2.74		0.959854
			2	1.95	0.93		2.09677				2	1.69	1.46		1.15753			2	1.91	2.25		0.848889			2	2.41	2.06		1.1699
						average	1.88028							average	1.14894						average	0.942302						average	1.06488
		image 007	1	1.68	1.13		1.48673			image 007	1	1.57	1.67		0.94012		image 005	1	2	2.18		0.917431		image 004	1	2.53	2.17		1.1659
			2	1.35	1.27		1.06299				2	1.83	1.57		1.16561			2	2.03	2.81		0.72242			2	2.53	2.28		1.10965
						average	1.27486							average	1.05286						average	0.819926						average	1.13777
						larvae 2 average	1.57757							larvae 2 average:	1.1009						larvae 2 average	0.881114						larvae 2 average	1.10133
		L4 good 2	1	2.51	1.23		2.04065			image 008	1	1.38	1.11		1.24324		image 010	1	1.88	2.5		0.752		image 005	1	1.94	1.94		1
			2	2.19	1.44		1.52083				2	1.4	1.27		1.10236			2	2.21	2.81		0.786477			2	2.13	1.97		1.08122
						average	1.78074							average	1.1728						average	0.769238						average	1.04061
		image 009	1	1.47	1.07		1.37383			image 009	1	1.48	1.67		0.886228		image 007	1	2.48	1.49		1.66443		image 006	1	3.03	3.08		0.983766
			2	1.63	1.44		1.13194				2	1.53	1.39		1.10072			2	1.59	1.98		0.80303			2	3.58	3		1.19333
						average	1.25289							average	0.993473						average	1.23373						average	1.08855
						larvae 3 average	1.51681							larvae 3 average:	1.08314						larvae 3 average	1.00148						larvae 3 average	1.06458
		image 010	1	2.33	1.5		1.55333										image 003	1	1.64	1.63		1.00613		image 007	1	2.76	2.4		1.15
			2	2.11	1.73		1.21965							average	1.06633			2	1.28	1.72		0.744186			2	2.92	2.65		1.10189
						average	1.38649							standard deviation	0.126769						average	0.875161						average	1.12594
		image 011	1	2.23	1.31		1.70229										image 001	1	1.64	1.39		1.17986		image 008	1	2.23	2.33		0.957082
			2	2.15	1.42		1.51408											2	2.37	1.8		1.02751			2	2.25	2		1.125
						average	1.60819														average	1.10368						average	1.04104
						larvae 4 average	1.49734														larvae 4 average	0.989421						larvae 4 average	1.08349
		image 012	1	1.81	0.85		2.12941														average	0.985195		image 009	1	3.01	2.2		1.36818
			2	2.02	1.59		1.27044														standard deviation	0.238791			2	2.49	2.06		1.20874
						average	1.69993																					average	1.28846
						larvae 5 average	1.69993																	image 010	1	2.78	2.61		1.06513
																									2	3.38	2.9		1.16552
																												average	1.11533
						average	1.5814
						standard deviation	0.352897																					larvae 5 average	1.20189
																								image 011	1	2.45	2.21		1.1086
			replicate #1 averages for Graphpad Superplots																						2	2.69	1.99		1.35176
				control	h.s. zif-1																							average	1.23018
				1.67462	1.01495
				1.57757	1.1009																			image 012	1	3.19	2.4		1.32917
				1.51681	1.08314																				2	2.85	2.87		0.993031
				1.49734	1.06876																							average	1.1611
				1.69993	0.881114
					1.00148																							larvae 6 average	1.19564
					0.989421
					1.26019																							average	1.15119
					1.10133																							standard deviation	0.135308
					1.06458
					1.08349
					1.20189
					1.19564
			average	1.59326	1.08053
		Replicate #2
		par-6(xn60); xnIs485; xnEx511[t28h11.8p::cfp, pRF4] control 061020								par-6(xn60); xnIs485[sec-10p::mCherry::sec-10]; xnEx508[hsp-16.41p::zif-1; t28h11.8p::CFP, pRF4] heat shock ZIF-1 061020
		sample #	measurement #	lumen mean intensity	cytoplasm mean intensity		lumen/cytoplasm			sample #	measurement #	lumen mean intensity	cytoplasm mean intensity		lumen/cytoplasm
		image001	1	1.2	0.56		2.14286			image001	1	0.53	0.48		1.10417
			2	1.22	0.81		1.50617				2	0.49	0.34		1.44118
						average	1.82451							average	1.27267
		image002	1	1.3	0.98		1.32653			image002	1	0.88	0.84		1.04762
			2	1.31	0.99		1.32323				2	0.82	0.7		1.17143
						average	1.32488							average	1.10952
						larvae 1 average	1.5747							larvae 1 average	1.1911
		image003	1	0.22	0.16		1.375			image003	1	0.5	0.31		1.6129
			2	0.22	0.16		1.375				2	0.5	0.33		1.51515
						average	1.375							average	1.56403
		image005	1	0.69	0.63		1.09524			image004	1	0.47	0.41		1.14634
			2	0.81	0.47		1.7234				2	0.46	0.43		1.06977
						average	1.40932							average	1.10805
						larvae 2 average	1.39216							larvae 2 average	1.33604
		image006	1	0.89	0.57		1.5614			image005	1	0.8	0.75		1.06667
			2	0.89	0.51		1.7451				2	0.87	0.7		1.24286
						average	1.65325							average	1.15476
		image007	1	1.34	0.95		1.41053			image006	1	0.94	0.9		1.04444
			2	1.29	1.11		1.16216				2	0.91	0.89		1.02247
						average	1.28634							average	1.03346
						larvae 3 average	1.4698							larvae 3 average	1.09411
		image008	1	1.01	0.53		1.90566			image007	1	0.73	0.57		1.2807
			2	0.98	0.45		2.17778				2	0.71	0.53		1.33962
						average	2.04172							average	1.31016
		image009	1	0.85	0.7		1.21429			image008	1	0.45	0.48		0.9375
			2	0.87	0.54		1.61111				2	0.53	0.48		1.10417
						average	1.4127							average	1.02083
						larvae 4 average	1.72721							larvae 4 average	1.1655
		image010	1	0.6	0.44		1.36364			image009	1	0.41	0.39		1.05128
			2	0.57	0.33		1.72727				2	0.3	0.24		1.25
						average	1.54545							average	1.15064
		image011	1	0.58	0.4		1.45			image010	1	0.59	0.61		0.967213
			2	0.58	0.38		1.52632				2	0.54	0.5		1.08
						average	1.48816							average	1.02361
						larvae 5 average	1.51681							larvae 5 average	1.08712
		image012	1	0.77	0.39		1.97436			image011	1	0.27	0.13		2.07692
			2	0.81	0.31		2.6129				2	0.25	0.15		1.66667
						average	2.29363							average	1.87179
		image013	1	0.54	0.48		1.125			image012	1	0.25	0.25		1
			2	0.7	0.36		1.94444				2	0.34	0.41		0.829268
						average	1.53472							average	0.914634
						larvae 6 average	1.91418							larvae 6 average	1.39321
		image014	1	0.49	0.41		1.19512			image013	1	0.85	0.63		1.34921
			2	0.63	0.32		1.96875				2	0.81	0.62		1.30645
						average	1.58194							average	1.32783
		image016	1	0.96	0.69		1.3913			image014	1	0.68	0.62		1.09677
			2	0.96	0.54		1.77778				2	0.71	0.63		1.12698
						average	1.58454							average	1.11188
						larvae 7 average	1.58324							larvae 7 average	1.21985
		image017	1	0.67	0.48		1.39583			image015	1	0.45	0.36		1.25
			2	0.56	0.31		1.80645				2	0.46	0.45		1.02222
						average	1.60114							average	1.13611
		image019	1	0.91	0.78		1.16667			image016	1	0.25	0.24		1.04167
			2	0.92	0.83		1.10843				2	0.23	0.25		0.92
						average	1.13755							average	0.980833
						larvae 8 average	1.36935							larvae 8 average	1.05847
										image017	1	0.38	0.3		1.26667
						average	1.56843				2	0.37	0.34		1.08824
						standard deviation	0.312752							average	1.17745
										image018	1	0.55	0.41		1.34146
			replicate #2 averages for Graphpad Superplots								2	0.51	0.37		1.37838
				control	h.s. zif-1									average	1.35992
				1.5747	1.1911
				1.39216	1.33604									larvae 9 average	1.26869
				1.4698	1.09411
				1.72721	1.1655					image019	1	0.46	0.37		1.24324
				1.51681	1.08712						2	0.38	0.45		0.844444
				1.91	1.39321									average	1.04384
				1.58324	1.21985
				1.36935	1.05847					image020	1	0.67	0.85		0.788235
					1.26869						2	0.81	0.68		1.19118
					1.01677									average	0.989706
					1.26669
														larvae 10 average	1.01677
										image021	1	1.11	0.72		1.54167
											2	1.04	0.65		1.6
			average	1.56791	1.19069									average	1.57083
										image022	1	0.33	0.39		0.846154
											2	0.41	0.38		1.07895
														average	0.962551
														larvae 11 average	1.26669
														average	1.19069
														standard deviation	0.185314
		Replicate #3
		par-6(xn60); xnIs485; xnEx511[t28h11.8p::cfp, pRF4] control 061420								par-6(xn60); xnIs485[sec-10p::mCherry::sec-10]; xnEx508[hsp-16.41p::zif-1; t28h11.8p::CFP, pRF4] heat shock ZIF-1 061420
		sample #	measurement #	lumen mean intensity	cytoplasm mean intensity		lumen/cytoplasm			sample #	measurement #	lumen mean intensity	cytoplasm mean intensity		lumen/cytoplasm
		image001	1	3.06	2.03		1.50739			image001	1	2.71	2.07		1.30918
			2	3.19	1.96		1.62755				2	2.81	2.27		1.23789
						average	1.56747							average	1.27353
		image002	1	2.59	1.84		1.40761			image002	1	2.73	2.76		0.98913
			2	2.78	1.87		1.48663				2	2.85	2.58		1.10465
						average	1.44712							average	1.04689
						larvae 1 average	1.50729							larvae 1 average	1.16021
		image003	1	2.75	1.84		1.49457			image003	1	2.34	2.03		1.15271
			2	2.66	1.62		1.64198				2	2.32	2.15		1.07907
						average	1.56827							average	1.11589
		image004	1	2.38	1.77		1.34463			image004	1	2	1.75		1.14286
			2	2.66	1.44		1.84722				2	1.89	1.96		0.964286
						average	1.59593							average	1.05357
						larvae 2 average	1.5821							larvae 2 average	1.08473
		image005	1	2.11	1.43		1.47552			image005	1	1.22	1.61		0.757764
			2	2.26	1.45		1.55862				2	1.7	1.59		1.06918
						average	1.51707							average	0.913473
		image006	1	2.58	1.72		1.5			image006	1	2.27	1.83		1.24044
			2	2.19	1.24		1.76613				2	2.24	1.55		1.44516
						average	1.63306							average	1.3428
						larvae 3 average	1.57507							larvae 3 average	1.12814
		image007	1	2.15	1.33		1.61654			image007	1	1.34	1.13		1.18584
			2	2.43	1.16		2.09483				2	1.32	1.03		1.28155
						average	1.85568							average	1.2337
		image008	1	1.55	1.12		1.38393			image008	1	1.15	0.99		1.16162
			2	1.66	1.18		1.40678				2	1.03	1.01		1.0198
						average	1.39535							average	1.09071
						larvae 4 average	1.62552							larvae 4 average	1.1622
		image011	1	2.56	1.48		1.72973			image009	1	1.83	1.56		1.17308
			2	2.85	1.8		1.58333				2	1.94	1.42		1.3662
						average	1.65653							average	1.26964
		image012	1	1.97	1.39		1.41727			image010	1	1.39	1.25		1.112
			2	1.97	1.62		1.21605				2	1.45	1.13		1.28319
						average	1.31666							average	1.19759
						larvae 5 average	1.48659							larvae 5 average	1.23361
		image013	1	2.61	1.67		1.56287			image011	1	1.88	1.72		1.09302
			2	2.69	1.55		1.73548				2	1.89	1.51		1.25166
						average	1.64918							average	1.17234
		image014	1	2.23	1.63		1.3681
			2	2.27	1.57		1.44586
						average	1.40698			image012	1	1.57	1.48		1.06081
											2	1.52	1.11		1.36937
						larvae 6 average	1.52808							average	1.21509
		image015	1	1.65	1.39		1.18705							larvae 6 average	1.19371
			2	1.68	1.01		1.66337
						average	1.42521			image013	1	1.6	1.55		1.03226
											2	1.7	1.38		1.23188
		image016	1	1.47	1.42		1.03521							average	1.13207
			2	1.44	1.13		1.27434
						average	1.15477
						larvae 7 average	1.28999			image014	1	1.87	1.77		1.0565
											2	1.7	1.45		1.17241
														average	1.11446
						average	1.51352							larvae 7 average	1.12326
						standard deviation	0.186852
										image015	1	3.4	2.83		1.20141
											2	3.41	2.68		1.27239
				replicate #3 061420 data										average	1.2369
				control	h.s. zif-1
				1.50729	1.16021
				1.5821	1.08473
				1.57507	1.12814					image016	1	1.78	1.38		1.28986
				1.62552	1.1622						2	1.62	1.38		1.17391
				1.48659	1.23361									average	1.23188
				1.52808	1.19371
				1.28999	1.12326									larvae 8 average	1.23439
					1.23439
					1.11162					image017	1	1.77	1.43		1.23776
					1.14751						2	1.8	1.59		1.13208
														average	1.18492
										image019	1	1.42	1.48		0.959459
			average	1.51352	1.15794						2	1.43	1.28		1.11719
														average	1.03832
														larvae 9 average	1.11162
										image020	1	2.1	2.01		1.04478
											2	2.09	1.63		1.28221
														average	1.16349
										image021	1	1.64	1.42		1.15493
											2	1.64	1.48		1.10811
														average	1.13152
														larvae 10 average	1.14751
														average	1.15794
														standard deviation	0.160731

## Sheet: Figure 5K - source data
	Figure 5K - source data. Fluorescent intensity values for lumenal membrane and cytoplasmic mCherry::SEC-10 measurements in PAR-3::ZF1::YFP (control vs heat shock ZIF-1)
		Replicate #1
		par-3(xn59); xnIs485; xnEx514[t28h11.8p::cfp, pRF4] control 121218								par-3(xn59); xnIs485; xnEx528[hsp-16.41p::zif-1; t28h11.8p::CFP, pRF4] heat shock ZIF-1 121218
		sample #	measurement #	lumen mean intensity	cytoplasm mean intensity		lumen/cytoplasm			sample #	measurement #	lumen mean intensity	cytoplasm mean intensity		lumen/cytoplasm
		image 001	1	4.13	1.92		2.15104			image 001	1	3.3	1.62		2.03704
			2	4.09	1.58		2.58861				2	3.14	1.9		1.65263
						average	2.36982							average	1.84483
		image 002	1	2.64	2.05		1.2878			image 002	1	2.82	1.9		1.48421
			2	3.14	2.01		1.56219				2	2.86	1.69		1.69231
						average	1.425							average	1.58826
						larvae 1 average	1.89741							larvae 1 average	1.71655
		image 003	1	3.02	1.66		1.81928			image 003	1	1.62	1.09		1.48624
			2	3.28	2.44		1.34426				2	1.68	0.86		1.95349
						average	1.58177							average	1.71986
		image 004	1	2.1	1.58		1.32911			image 004	1	2.47	2.08		1.1875
			2	2.34	1.39		1.68345				2	2.44	2.33		1.04721
						average	1.50628							average	1.11736
						larvae 2 average	1.54403							larvae 2 average	1.41861
		image 005	1	3.02	1.45		2.08276			image 005	1	1.01	0.81		1.24691
			2	3.23	1.67		1.93413				2	1.6	1.19		1.34454
						average	2.00845							average	1.29573
		image 006	1	2.6	1.79		1.45251			image 006	1	1.13	0.87		1.29885
			2	2.39	1.98		1.20707				2	1.39	1.29		1.07752
						average	1.32979							average	1.18818
						larvae 3 average	1.66912							larvae 3 average	1.24196
		image 007	1	2.09	1.45		1.44138			image 007	1	2.36	1.49		1.58389
			2	2.91	1.26		2.30952				2	1.89	1.51		1.25166
						average	1.87545							average	1.41777
		image 008	1	1.84	2.2		0.836364			image 008	1	1.66	1.1		1.50909
			2	2.28	1.31		1.74046				2	1.62	1.27		1.27559
						average	1.28841							average	1.39234
						larvae 4 average	1.58193							larvae 4 average	1.40506
		image 009	1	0.49	0.24		2.04167			image 009	1	2.1	0.99		2.12121
			2	0.48	0.24		2				2	1.94	0.96		2.02083
						average	2.02083							average	2.07102
		image 010	1	1.3	1.19		1.09244			image 010	1	1.63	1.25		1.304
			2	1.32	1.03		1.28155				2	1.5	0.99		1.51515
						average	1.187							average	1.40958
						larvae 5 average	1.60391							larvae 5 average	1.7403
		image 011	1	2.65	1.73		1.53179			image 011	1	2.61	0.9		2.9
			2	2.41	1.51		1.59603				2	2.26	1.74		1.29885
						average	1.56391							average	2.09943
		image 012	1	1.92	1.33		1.44361			image 012	1	2.07	1.37		1.51095
			2	1.92	1.33		1.44361				2	2.14	1.54		1.38961
						average	1.44361							average	1.45028
						larvae 6 average	1.50376							larvae 6 average	1.77485
		image 013	1	2.93	1.74		1.68391			image 013	1	1.19	0.79		1.50633
			2	2.64	1.75		1.50857				2	1.01	0.82		1.23171
						average	1.59624							average	1.36902
		image 014	1	2.49	1.82		1.36813			image 014	1	2.12	1.48		1.43243
			2	2.72	1.64		1.65854				2	1.86	1.44		1.29167
						average	1.51333							average	1.36205
						larvae 7 average	1.55479							larvae 7 average	1.36553
						average	1.62214							average	1.52326
						standard deviation	0.387421							standard deviation	0.389549
			replicate #1 averages for Graphpad Superplots
				control	h.s. zif-1
				1.9	1.71655
				1.54403	1.41861
				1.66912	1.24196
				1.58193	1.40506
				1.60391	1.7403
				1.50376	1.77485
				1.55479	1.36553
			average	1.62251	1.52326
		Replicate #2
		par-3(xn59); xnIs485; xnEx514[t28h11.8p::cfp, pRF4] control 061820								par-3(xn59); xnIs485; xnEx528[hsp-16.41p::zif-1; t28h11.8p::CFP, pRF4] heat shock ZIF-1 061820
		sample #	measurement #	lumen mean intensity	cytoplasm mean intensity		lumen/cytoplasm			sample #	measurement #	lumen mean intensity	cytoplasm mean intensity		lumen/cytoplasm
		image001	1	1.93	1.81		1.0663			image001	1	1.97	1.65		1.19394
			2	2.19	1.91		1.1466				2	2.02	1.22		1.65574
						average	1.10645							average	1.42484
		image003	1	2.33	1.66		1.40361			image002	1	1.52	1.07		1.42056
			2	2.03	1.74		1.16667				2	1.54	1.22		1.2623
						average	1.28514							average	1.34143
						larvae 1 average	1.19579							larvae 1 average	1.38313
		image004	1	2.38	1.69		1.40828			image003	1	2.34	1.56		1.5
			2	2.5	1.31		1.9084				2	2.37	1.42		1.66901
						average	1.65834							average	1.58451
		image005	1	1.9	1.91		0.994764			image004	1	1.66	1.43		1.16084
			2	1.97	1.46		1.34932				2	2.02	1.35		1.4963
						average	1.17204							average	1.32857
						larvae 2 average	1.41519							larvae 2 average	1.45654
		image006	1	1.62	0.88		1.84091			image006	1	1.8	1.13		1.59292
			2	1.66	0.86		1.93023				2	1.55	1.12		1.38393
						average	1.88557							average	1.48842
		image007	1	1.9	1.29		1.47287			image007	1	1.14	0.81		1.40741
			2	1.94	1.79		1.0838				2	1.12	0.96		1.16667
						average	1.27833							average	1.28704
						larvae 3 average	1.58195							larvae 3 average	1.38773
		image008	1	1.79	0.93		1.92473			image008	1	2.1	1.82		1.15385
			2	1.67	0.83		2.01205				2	1.97	1.62		1.21605
						average	1.96839							average	1.18495
		image009	1	2.24	2.11		1.06161			image009	1	1.98	1.54		1.28571
			2	2.65	2.16		1.22685				2	1.79	1.37		1.30657
						average	1.14423							average	1.29614
						larvae 4 average	1.55631							larvae 4 average	1.24054
		image010	1	0.92	0.63		1.46032			image010	1	1.95	1.79		1.08939
			2	0.95	0.58		1.63793				2	2.04	1.62		1.25926
						average	1.54912							average	1.17432
		image011	1	1.25	0.98		1.27551			image011	1	1.68	1.03		1.63107
			2	1.26	0.77		1.63636				2	1.74	1.47		1.18367
						average	1.45594							average	1.40737
						larvae 5 average	1.50253							larvae 5 average	1.29085
		image012	1	2.13	1.4		1.52143			image012	1	2.19	1.55		1.4129
			2	2.1	1.2		1.75				2	2.39	1.32		1.81061
						average	1.63571							average	1.61175
		image013	1	2.06	1.73		1.19075			image013	1	1.7	1.09		1.55963
			2	2.13	1.85		1.15135				2	1.86	1.07		1.73832
						average	1.17105							average	1.64898
						larvae 6 average	1.40338							larvae 6 average	1.63037
		image014	1	1.86	1.07		1.73832			image014	1	3.57	2.35		1.51915
			2	1.67	1.06		1.57547				2	3.49	2.45		1.42449
						average	1.65689							average	1.47182
		image015	1	1.74	1.42		1.22535			image015	1	2.68	2.56		1.04688
			2	1.83	1.59		1.15094				2	2.89	2.04		1.41667
						average	1.18815							average	1.23177
						larvae 7 average	1.42252							larvae 7 average	1.3518
		image016	1	1.12	0.83		1.3494			image016	1	1.14	1.04		1.09615
			2	1.29	0.92		1.40217				2	1.26	0.94		1.34043
						average	1.37579							average	1.21829
		image018	1	0.84	0.84		1			image017	1	1.02	1.03		0.990291
			2	0.95	0.61		1.55738				2	1.21	0.77		1.57143
						average	1.27869							average	1.28086
						larvae 8 average	1.32724							larvae 8 average	1.24957
		image019	1	1.68	1.39		1.20863
			2	1.57	1.29		1.21705							average	1.37382
						average	1.21284							standard deviation	0.206133
		image020	1	1.98	1.8		1.1
			2	2.1	1.76		1.19318
						average	1.14659
						larvae 9 average	1.17972
						average	1.39829								f
						standard deviation	0.310246
			replicate #2 averages for Graphpad Superplots
				control	h.s. zif-1
				1.19579	1.38313
				1.41519	1.45654
				1.58195	1.38773
				1.55631	1.24054
				1.50253	1.29085
				1.40338	1.63037
				1.42252	1.3518
				1.32724	1.24957
				1.17972
			average	1.39829	1.37382
		Replicate #3
		par-3(xn59); xnIs485; xnEx514[t28h11.8p::cfp, pRF4] control 062120								par-3(xn59); xnIs485; xnEx528[hsp-16.41p::zif-1; t28h11.8p::CFP, pRF4] heat shock ZIF-1 062120
		sample #	measurement #	lumen mean intensity	cytoplasm mean intensity		lumen/cytoplasm			sample #	measurement #	lumen mean intensity	cytoplasm mean intensity		lumen/cytoplasm
		image001	1	2.07	1.73		1.19653			image001	1	1.78	1.48		1.2027
			2	2.51	1.59		1.57862				2	1.92	1.7		1.12941
						average	1.38757							average	1.16606
		image002	1	2.7	2.29		1.17904			image003	1	1.58	1.24		1.27419
			2	2.81	2.43		1.15638				2	2.14	1.82		1.17582
						average	1.16771							average	1.22501
						larvae 1 average	1.27764							larvae 1 average	1.19553
		image003	1	1.76	1.01		1.74257			image004	1	3.32	1.77		1.87571
			2	2.07	1.02		2.02941				2	2.75	1.94		1.41753
						average	1.88599							average	1.64662
		image004	1	1.7	1.54		1.1039			image005	1	1.82	1.43		1.27273
			2	1.8	1.41		1.2766				2	1.64	1.5		1.09333
						average	1.19025							average	1.18303
						larvae 2 average	1.53812							larvae 2 average	1.41482
		image005	1	3.39	2.36		1.43644			image006	1	1.05	0.5		2.1
			2	3.39	2.28		1.48684				2	1.09	0.56		1.94643
						average	1.46164							average	2.02321
		image006	1	4.14	2.71		1.52768			image007	1	0.79	0.64		1.23438
			2	3.62	2.24		1.61607				2	0.87	0.82		1.06098
						average	1.57187							average	1.14768
						larvae 3 average	1.51676							larvae 3 average	1.58544
		image007	1	1.4	0.95		1.47368			image009	1	2.34	1.66		1.40964
			2	1.48	0.76		1.94737				2	2.34	1.38		1.69565
						average	1.71053							average	1.55265
		image008	1	2.39	1.78		1.3427			image010	1	2.06	1.35		1.52593
			2	2.15	2.06		1.04369				2	1.75	1.68		1.04167
						average	1.19319							average	1.2838
						larvae 4 average	1.45186							larvae 4 average	1.41822
		image009	1	1.42	1.18		1.20339			image011	1	2.58	1.57		1.64331
			2	1.84	1.36		1.35294				2	2.44	1.91		1.27749
						average	1.27817							average	1.4604
		image010	1	2.18	1.65		1.32121			image012	1	2.07	1.78		1.16292
			2	1.88	1.71		1.09942				2	2.16	1.7		1.27059
						average	1.21031							average	1.21675
						larvae 5 average	1.24424							larvae 5 average	1.33858
		image011	1	3.47	1.77		1.96045			image013	1	1.26	0.97		1.29897
			2	3.37	1.99		1.69347				2	1.35	1.14		1.18421
						average	1.82696							average	1.24159
		image012	1	1.42	1.16		1.22414			image014	1	2.33	2.65		0.879245
			2	1.12	1.22		0.918033				2	2.64	2.23		1.18386
						average	1.07109							average	1.03155
						larvae 6 average	1.44902							larvae 6 average	1.13657
		image013	1	2.25	1		2.25			image015	1	1.8	0.96		1.875
			2	2.3	1		2.3				2	1.78	1		1.78
						average	2.275							average	1.8275
		image014	1	2.41	1.57		1.53503			image016	1	1.97	1.38		1.42754
			2	2.4	1.69		1.42012				2	2.01	1.8		1.11667
						average	1.47758							average	1.2721
						larvae 7 average	1.87629							larvae 7 average	1.5498
		image015	1	2.65	1.65		1.60606			image017	1	2.41	1.27		1.89764
			2	2.61	1.78		1.46629				2	2.37	1.32		1.79545
						average	1.53618							average	1.84655
		image016	1	1.8	1.38		1.30435			image018	1	1.94	1.33		1.45865
			2	1.97	1.45		1.35862				2	1.99	1.21		1.64463
						average	1.33148							average	1.55164
						larvae 8 average	1.43383							larvae 8 average	1.69909
						average	1.47347							average	1.41726
						standard deviation	0.3591							standard deviation	0.31245
			replicate #3 averages for Graphpad Superplots
				control	h.s. zif-1
				1.27764	1.19553
				1.53812	1.41482
				1.51676	1.58544
				1.45186	1.41822
				1.24424	1.33858
				1.44902	1.13657
				1.87629	1.5498
				1.43383	1.69909
			average	1.47347	1.41726
