# Supplementary material for: A polarity pathway for exocyst-dependent intracellular tube extension
Source: eLife journal article supplement (doi:10.7554/elife.65169), 2021-03-09
Supplement: supp [file elife-65169-supp-v1.zip › elife_poa_e65169_Figure_6_source_data_1.xlsx]

## Sheet: Figure 6C - source data
		Figure 6C - source data. Fluorescent intensity values for line trace measurements of PAR-3::ZF1::YFP; PAR-6::mKate (control)
		par-3(xn59); par-6(cp60); xnEx491[t28h11.8p::cfp, pRF4] replicate3 062820
		larvae004
		red channel (par-6-mkate)	measurements				multiply to fit to y-axis		yellow channel (par-3-zf1-yfp)	measurements					multiply to fit to y-axis
		distance (microns)	m1	m2	m3	avg	*14		distance (microns)	m1	m2	m3	avg	normalized to red channel	*14
		0	1.05653	1.0661	1.07235	1.06499	14.9099		0	0.01315	0.0295	0.00206	0.0149033	0.0596133	0.834587
		0.06602	1.46993	1.18282	1.20751	1.28675	18.0145		0.06602	0.04661	0.00662	0.03502	0.0294167	0.117667	1.64733
		0.13204	1.49004	1.33485	1.50529	1.44339	20.2075		0.13204	0.01554	0.02949	0.0031	0.0160433	0.0641733	0.898427
		0.19806	1.3888	1.59381	1.54901	1.51054	21.1476		0.19806	0.00262	0.02783	0.04332	0.02459	0.09836	1.37704
		0.26408	1.39081	1.64616	1.81478	1.61725	22.6415		0.26408	0	0	0.02483	0.00827667	0.0331067	0.463493
		0.3301	1.70348	1.74223	1.88623	1.77731	24.8824		0.3301	0	0	0	0	0	0
		0.39611	2.04036	2.06067	2.14221	2.08108	29.1351		0.39611	0	0	0	0	0	0
		0.46213	2.31033	2.46698	2.18584	2.32105	32.4947		0.46213	0	0.00788	0	0.00262667	0.0105067	0.147093
		0.52815	2.51872	2.86934	2.56519	2.65108	37.1152		0.52815	0.00179	0.0801	0.01032	0.0307367	0.122947	1.72125
		0.59417	2.79762	3.15798	2.89309	2.94956	41.2939		0.59417	0.07736	0.08228	0.10388	0.08784	0.35136	4.91904
		0.66019	3.38873	4.1077	3.40203	3.63282	50.8595		0.66019	0.12946	0.26058	0.10518	0.165073	0.660293	9.24411
		0.72621	4.1234	4.55582	3.77287	4.1507	58.1098		0.72621	0.41555	0.70088	0.45636	0.524263	2.09705	29.3587
		0.79223	4.69201	4.83261	4.48915	4.67126	65.3976		0.79223	1.07558	1.15082	0.89805	1.04148	4.16593	58.3231
		0.85825	5.50296	4.39736	4.73721	4.87918	68.3085		0.85825	1.35604	1.26931	1.12097	1.24877	4.99509	69.9313
		0.92427	5.20359	4.16133	4.39467	4.58653	64.2114		0.92427	1.4731	1.17439	1.41239	1.35329	5.41317	75.7844
		0.99029	4.84273	4.0194	4.04094	4.30102	60.2143		0.99029	1.16082	0.89431	1.07379	1.04297	4.17189	58.4065
		1.05631	3.81225	3.85066	3.89147	3.85146	53.9204		1.05631	0.92883	0.66578	0.91656	0.837057	3.34823	46.8752
		1.12232	3.36955	3.1416	3.55541	3.35552	46.9773		1.12232	0.57105	0.61327	0.67817	0.62083	2.48332	34.7665
		1.18834	3.11974	2.71904	2.82106	2.88661	40.4126		1.18834	0.33347	0.49223	0.63361	0.486437	1.94575	27.2405
		1.25436	2.66738	2.73354	2.6475	2.68281	37.5593		1.25436	0.27384	0.42413	0.43754	0.378503	1.51401	21.1962
		1.32038	2.77118	2.86781	2.6923	2.7771	38.8794		1.32038	0.30477	0.38521	0.33333	0.341103	1.36441	19.1018
		1.3864	2.97131	3.05724	2.9807	3.00308	42.0432		1.3864	0.32525	0.33126	0.24478	0.30043	1.20172	16.8241
		1.45242	3.36882	3.13006	2.94989	3.14959	44.0943		1.45242	0.40607	0.51993	0.37787	0.434623	1.73849	24.3389
		1.51844	3.50784	3.16207	3.20053	3.29015	46.0621		1.51844	0.33878	0.50799	0.42171	0.422827	1.69131	23.6783
		1.58446	3.9525	3.21007	3.21435	3.45897	48.4256		1.58446	0.24603	0.84882	0.585	0.55995	2.2398	31.3572
		1.65048	4.14452	4.08202	3.67213	3.96622	55.5271		1.65048	0.5879	0.7117	0.68087	0.660157	2.64063	36.9688
		1.7165	4.79437	5.51486	4.42353	4.91092	68.7529		1.7165	0.79498	1.21231	0.67471	0.894	3.576	50.064
		1.78252	5.01886	6.37963	5.96983	5.78944	81.0522		1.78252	1.13778	1.62929	1.38796	1.38501	5.54004	77.5606
		1.84853	4.90362	6.43247	6.53982	5.95864	83.4209		1.84853	1.39129	1.39235	1.46783	1.41716	5.66863	79.3608
		1.91455	4.56247	5.47856	6.49739	5.51281	77.1793		1.91455	1.24548	0.88301	1.20135	1.10995	4.43979	62.157
		1.98057	3.96156	3.98881	5.53036	4.49358	62.9101		1.98057	0.83659	0.40588	0.89526	0.712577	2.85031	39.9043
		2.04659	3.55428	2.46466	3.92189	3.31361	46.3905		2.04659	0.33015	0.11635	0.48947	0.31199	1.24796	17.4714
		2.11261	2.62975	1.93628	2.78979	2.45194	34.3272		2.11261	0.26692	0.05605	0.18751	0.17016	0.68064	9.52896
		2.17863	1.88541	1.41982	2.17126	1.8255	25.557		2.17863	0.10315	0.00599	0.10291	0.0706833	0.282733	3.95827
		2.24465	1.12045	0.88418	1.51008	1.17157	16.402		2.24465	0	0.01144	0.06489	0.0254433	0.101773	1.42483
		2.31067	1.0977	0.89133	1.09851	1.02918	14.4085		2.31067	0	0.02361	0.01892	0.0141767	0.0567067	0.793893
		2.37669	1.01152	0.81599	0.99459	0.9407	13.1698		2.37669	0	0	0.01738	0.00579333	0.0231733	0.324427
		2.44271	0.87403	0.76084	0.83671	0.82386	11.534		2.44271	0	0	0	0	0	0
		2.50873	0.7424	0.64218	0.70769	0.697423	9.76393		2.50873	0	0	0	0	0	0
		2.57474	0.67753	0.49759	0.58136	0.585493	8.19691		2.57474	0	0	0	0	0	0
		2.64076	0.74948	0.69152	0.62793	0.689643	9.65501		2.64076	0	0	0	0	0	0
		2.70678	0.7339	0.65995	0.65759	0.683813	9.57339		2.70678	0	0	0	0	0	0
		2.7728	0.83223	0.78015	0.73975	0.784043	10.9766		2.7728	0	0	0	0	0	0
		larvae001
		red channel (par-6-mkate)	measurements				multiply to fit to y-axis		yellow channel (par-3-zf1-yfp)	measurements					multiply to fit to y-axis
		distance (microns)	m1	m2	m3		*14		distance (microns)	m1	m2	m3	avg	normalized to red channel	*14
		0	1.44852	1.32085	1.7173	1.49556	20.9378		0	0	0	0.001	0.000333333	0.00133333	0.0186667
		0.06602	1.25603	1.21828	1.56004	1.34478	18.827		0.06602	0	0	0	0	0	0
		0.13204	1.49121	1.52036	1.49499	1.50219	21.0306		0.13204	0	0	0	0	0	0
		0.19806	1.85136	1.72332	1.93596	1.83688	25.7163		0.19806	0	0	0.00292	0.000973333	0.00389333	0.0545067
		0.26408	1.80302	1.88735	1.96144	1.88394	26.3751		0.26408	0	0	0.03046	0.0101533	0.0406133	0.568587
		0.3301	2.03877	1.8214	2.23598	2.03205	28.4487		0.3301	3e-05	0	0.03106	0.0103633	0.0414533	0.580347
		0.39611	2.08949	2.18397	2.33941	2.20429	30.8601		0.39611	0.02919	0	0.0025	0.0105633	0.0422533	0.591547
		0.46213	2.33875	2.41172	2.7288	2.49309	34.9033		0.46213	0.04937	0.0209	0.06039	0.0435533	0.174213	2.43899
		0.52815	2.75023	2.67884	3.25114	2.8934	40.5076		0.52815	0.0423	0.07291	0.07301	0.06274	0.25096	3.51344
		0.59417	3.41555	3.01256	3.56199	3.33003	46.6205		0.59417	0.17998	0.16525	0.19663	0.18062	0.72248	10.1147
		0.66019	3.90051	3.62886	4.54274	4.02404	56.3365		0.66019	0.30335	0.20155	0.29268	0.26586	1.06344	14.8882
		0.72621	4.57155	4.2237	5.38698	4.72741	66.1837		0.72621	0.71196	0.48351	0.88708	0.694183	2.77673	38.8743
		0.79223	4.95313	4.71441	5.54478	5.07077	70.9908		0.79223	1.14902	1.0435	1.32374	1.17209	4.68835	65.6369
		0.85825	4.8274	4.9066	5.69551	5.14317	72.0044		0.85825	1.41353	1.5281	1.57155	1.50439	6.01757	84.246
		0.92427	4.79008	5.05608	5.60488	5.15035	72.1049		0.92427	1.5868	1.73164	1.62426	1.64757	6.59027	92.2637
		0.99029	4.62476	4.60785	4.84145	4.69135	65.6789		0.99029	1.29298	1.49285	1.36758	1.38447	5.53788	77.5303
		1.05631	4.33039	4.04185	4.45487	4.2757	59.8598		1.05631	0.87857	1.16223	0.98357	1.00812	4.03249	56.4549
		1.12232	3.67095	3.67838	4.1922	3.84718	53.8605		1.12232	0.71625	0.87015	0.80241	0.79627	3.18508	44.5911
		1.18834	3.27854	3.54899	3.85179	3.55977	49.8368		1.18834	0.55807	0.77245	0.40077	0.577097	2.30839	32.3174
		1.25436	3.50192	3.03905	3.17904	3.24	45.36		1.25436	0.38874	0.71744	0.46106	0.522413	2.08965	29.2551
		1.32038	3.31054	3.38928	3.0445	3.24811	45.4735		1.32038	0.35385	0.6652	0.54135	0.520133	2.08053	29.1275
		1.3864	3.08501	3.24389	2.99128	3.10673	43.4942		1.3864	0.26711	0.71408	0.39974	0.46031	1.84124	25.7774
		1.45242	2.70415	3.22574	3.13382	3.02124	42.2973		1.45242	0.38257	0.50044	0.45241	0.44514	1.78056	24.9278
		1.51844	2.76497	3.33103	3.23642	3.11081	43.5513		1.51844	0.31804	0.65228	0.39592	0.455413	1.82165	25.5031
		1.58446	3.01665	3.39275	3.06701	3.1588	44.2232		1.58446	0.39328	0.63147	0.58451	0.53642	2.14568	30.0395
		1.65048	3.19177	3.56602	3.54457	3.43412	48.0777		1.65048	0.62987	0.66331	0.50802	0.6004	2.4016	33.6224
		1.7165	3.51853	4.10662	3.77133	3.79883	53.1836		1.7165	0.55978	0.93236	0.71657	0.736237	2.94495	41.2293
		1.78252	3.7201	4.32989	4.47513	4.17504	58.4506		1.78252	0.95315	1.13771	1.08781	1.05956	4.23823	59.3352
		1.84853	4.72616	4.7297	5.2872	4.91435	68.8009		1.84853	1.33342	1.16729	1.57832	1.35968	5.43871	76.1419
		1.91455	4.94788	4.69345	5.85067	5.164	72.296		1.91455	1.55041	1.43546	1.64104	1.5423	6.16921	86.369
		1.98057	4.71587	4.28276	5.34804	4.78222	66.9511		1.98057	1.27744	1.12589	1.79615	1.39983	5.59931	78.3903
		2.04659	4.21157	3.67728	5.29589	4.39491	61.5288		2.04659	1.02672	0.85167	1.26945	1.04928	4.19712	58.7597
		2.11261	3.54568	3.2811	4.30793	3.71157	51.962		2.11261	0.59112	0.44884	0.56859	0.536183	2.14473	30.0263
		2.17863	2.93064	2.80672	3.6015	3.11295	43.5813		2.17863	0.27621	0.18721	0.16809	0.210503	0.842013	11.7882
		2.24465	2.67148	2.60199	2.74627	2.67325	37.4255		2.24465	0.06013	0.00344	0.04854	0.03737	0.14948	2.09272
		2.31067	2.09559	2.01926	2.21468	2.10984	29.5378		2.31067	0.01971	0	0.00062	0.00677667	0.0271067	0.379493
		2.37669	2.08799	1.83724	1.59418	1.8398	25.7572		2.37669	0	0	0	0	0	0
		2.44271	1.72768	1.6597	1.43063	1.606	22.484		2.44271	0.01767	0	0	0.00589	0.02356	0.32984
		2.50873	1.64693	1.72008	1.32848	1.56516	21.9123		2.50873	0.01672	0	0	0.00557333	0.0222933	0.312107
		2.57474	1.48982	1.58282	1.617	1.56321	21.885		2.57474	0	0	0.00042	0.00014	0.00056	0.00784
		2.64076	1.54589	1.63979	1.35478	1.51349	21.1888		2.64076	0	0	0.07572	0.02524	0.10096	1.41344
		2.70678	1.33391	1.73773	1.31646	1.4627	20.4778		2.70678	0	0	0.02568	0.00856	0.03424	0.47936
		2.7728	1.3868	1.61557	1.30951	1.43729	20.1221		2.7728	0	0	0.0297	0.0099	0.0396	0.5544
		ilarvae003
		red channel (par-6-mkate)	measurements				multiply to fit to y-axis		yellow channel (par-3-zf1-yfp)	measurements					multiply to fit to y-axis
		distance (microns)	m1	m2	m3		*14		distance (microns)	m1	m2	m3	avg	normalized to red channel	*14
		0	1.82052	1.72911	1.67312	1.74092	24.3728		0	0.00448	0.03287	0.00898	0.0154433	0.0617733	0.864827
		0.06602	1.64217	1.61476	1.53	1.59564	22.339		0.06602	0.0168	0.00409	0.02349	0.0147933	0.0591733	0.828427
		0.13204	1.73872	1.65316	1.45614	1.61601	22.6241		0.13204	0.01968	0	2e-05	0.00656667	0.0262667	0.367733
		0.19806	1.74774	1.65384	1.50505	1.63554	22.8976		0.19806	0.00169	0	0.02508	0.00892333	0.0356933	0.499707
		0.26408	2.22694	1.78194	1.4167	1.80853	25.3194		0.26408	0.09923	0	0.00772	0.03565	0.1426	1.9964
		0.3301	2.16162	1.83775	1.79051	1.92996	27.0194		0.3301	0.12448	0.00212	0.01807	0.0482233	0.192893	2.70051
		0.39611	2.4294	2.1101	2.09786	2.21245	30.9743		0.39611	0.01004	0.06396	0.01529	0.0297633	0.119053	1.66675
		0.46213	2.67835	2.49158	2.51261	2.56085	35.8519		0.46213	0.0377	0.01158	0.03054	0.0266067	0.106427	1.48997
		0.52815	2.70336	2.94493	3.11341	2.92057	40.8879		0.52815	0.0293	0.07489	0.01446	0.03955	0.1582	2.2148
		0.59417	2.95827	3.75053	3.39153	3.36678	47.1349		0.59417	0.03896	0.12959	0.15607	0.108207	0.432827	6.05957
		0.66019	3.31762	4.44407	4.64731	4.13633	57.9087		0.66019	0.02738	0.24371	0.32352	0.198203	0.792813	11.0994
		0.72621	3.74215	5.25216	5.04456	4.67962	65.5147		0.72621	0.04238	0.5612	0.57717	0.393583	1.57433	22.0407
		0.79223	4.3833	5.89027	5.62108	5.29822	74.175		0.79223	0.15644	1.19747	0.90948	0.754463	3.01785	42.2499
		0.85825	5.3447	6.47174	5.03028	5.61557	78.618		0.85825	0.41111	1.58677	1.0592	1.01903	4.07611	57.0655
		0.92427	6.28801	6.48372	4.54494	5.77222	80.8111		0.92427	0.92009	1.88066	0.91691	1.23922	4.95688	69.3963
		0.99029	6.70557	6.04426	4.12994	5.62659	78.7723		0.99029	1.46131	1.44922	0.73663	1.21572	4.86288	68.0803
		1.05631	6.9881	5.67004	3.64507	5.4344	76.0816		1.05631	1.2807	1.03851	0.598	0.972403	3.88961	54.4546
		1.12232	6.50893	5.49899	3.26898	5.0923	71.2922		1.12232	1.05492	0.9401	0.54953	0.848183	3.39273	47.4983
		1.18834	5.75593	4.88145	3.16336	4.60025	64.4035		1.18834	0.99247	0.88867	0.37867	0.75327	3.01308	42.1831
		1.25436	5.14562	4.58206	2.91637	4.21468	59.0056		1.25436	0.81845	0.74598	0.28016	0.614863	2.45945	34.4323
		1.32038	4.79016	4.41757	2.88553	4.03109	56.4352		1.32038	0.9134	0.80177	0.26709	0.660753	2.64301	37.0022
		1.3864	4.21769	4.73983	2.62272	3.86008	54.0411		1.3864	0.72094	0.8345	0.20672	0.587387	2.34955	32.8937
		1.45242	4.43079	4.60732	2.63572	3.89128	54.4779		1.45242	0.52298	0.82568	0.26298	0.537213	2.14885	30.0839
		1.51844	5.21852	4.99767	2.89121	4.36913	61.1679		1.51844	0.76612	0.78893	0.31136	0.622137	2.48855	34.8397
		1.58446	5.46761	5.2924	3.38287	4.71429	66.0001		1.58446	0.83258	1.10474	0.23246	0.72326	2.89304	40.5026
		1.65048	5.71542	6.37785	3.62272	5.23866	73.3413		1.65048	0.97687	1.35732	0.36424	0.899477	3.59791	50.3707
		1.7165	6.40005	7.36813	4.14634	5.97151	83.6011		1.7165	1.39966	1.49119	0.68661	1.19249	4.76995	66.7793
		1.78252	6.42157	6.92908	4.9316	6.09408	85.3172		1.78252	1.50234	1.66654	1.06804	1.41231	5.64923	79.0892
		1.84853	5.48412	5.56672	5.93566	5.66217	79.2703		1.84853	1.43302	1.52886	1.30995	1.42394	5.69577	79.7408
		1.91455	4.85821	4.55746	5.53904	4.9849	69.7886		1.91455	1.02708	0.84136	1.14272	1.00372	4.01488	56.2083
		1.98057	4.26146	3.50111	4.72225	4.16161	58.2625		1.98057	0.32902	0.48724	0.68747	0.501243	2.00497	28.0696
		2.04659	3.47843	3.04366	3.7905	3.43753	48.1254		2.04659	0.09605	0.14732	0.45921	0.234193	0.936773	13.1148
		2.11261	3.26656	2.31687	3.1191	2.90084	40.6118		2.11261	0.03379	0.02768	0.12861	0.06336	0.25344	3.54816
		2.17863	2.60406	2.31494	2.45127	2.45676	34.3946		2.17863	0.02368	0	0.0348	0.0194933	0.0779733	1.09163
		2.24465	2.52773	1.76533	2.04192	2.11166	29.5632		2.24465	0.00662	0.01266	0.02294	0.0140733	0.0562933	0.788107
		2.31067	2.09378	1.84436	1.61977	1.85264	25.9369		2.31067	0.03771	0.04084	0.00888	0.0291433	0.116573	1.63203
		2.37669	2.01922	1.74169	1.37006	1.71032	23.9445		2.37669	0.01994	0.04381	0	0.02125	0.085	1.19
		2.44271	2.03242	1.77754	1.27124	1.69373	23.7123		2.44271	0.06443	0	0	0.0214767	0.0859067	1.20269
		2.50873	2.06782	1.54582	1.00275	1.5388	21.5432		2.50873	0.04353	0.03302	0	0.0255167	0.102067	1.42893
		2.57474	1.89166	1.58509	0.86365	1.4468	20.2552		2.57474	0	0.03242	0	0.0108067	0.0432267	0.605173
		2.64076	1.86137	1.36478	1.12429	1.45015	20.3021		2.64076	0	0	0	0	0	0
		2.70678	1.74099	1.46218	0.98735	1.39684	19.5558		2.70678	0	0	0	0	0	0
		2.7728	1.65384	1.36789	1.12803	1.38325	19.3655		2.7728	0	0	0	0	0	0
		larvae011
		red channel (par-6-mkate)	measurements				multiply to fit to y-axis		yellow channel (par-3-zf1-yfp)	measurements					multiply to fit to y-axis
		distance (microns)	m1	m2	m3		*14		distance (microns)	m1	m2	m3		normalized to red	*14
		0	1.55889	1.46714	2.02417	1.6834	23.5676		0	0.03314	0	0.02811	0.0204167	0.0816667	1.14333
		0.06602	1.62417	1.58609	1.86643	1.69223	23.6912		0.06602	0.00343	0	0.02822	0.01055	0.0422	0.5908
		0.13204	1.95415	1.82047	1.65435	1.80966	25.3352		0.13204	0	0	0	0	0	0
		0.19806	2.00103	1.82879	1.84091	1.89024	26.4634		0.19806	0.01715	0	0	0.00571667	0.0228667	0.320133
		0.26408	2.20435	1.77055	2.03236	2.00242	28.0339		0.26408	0.01753	0	0	0.00584333	0.0233733	0.327227
		0.3301	2.15288	1.70403	1.86347	1.90679	26.6951		0.3301	0	0	0	0	0	0
		0.39611	2.34635	1.8442	1.82035	2.00363	28.0509		0.39611	0.02792	0	0.00558	0.0111667	0.0446667	0.625333
		0.46213	2.50305	2.38709	1.97822	2.28945	32.0523		0.46213	0.01213	0	0.04377	0.0186333	0.0745333	1.04347
		0.52815	2.73248	2.50293	2.17265	2.46935	34.5709		0.52815	0.06122	0	0.01966	0.02696	0.10784	1.50976
		0.59417	2.88316	2.96496	2.37793	2.74202	38.3882		0.59417	0.05076	0.07439	0.03796	0.05437	0.21748	3.04472
		0.66019	3.22125	3.11771	2.94532	3.09476	43.3266		0.66019	0.16479	0.08443	0.14363	0.13095	0.5238	7.3332
		0.72621	3.76129	3.6933	3.30051	3.58503	50.1905		0.72621	0.24243	0.39749	0.29796	0.312627	1.25051	17.5071
		0.79223	4.81588	4.2889	3.90508	4.33662	60.7127		0.79223	0.32059	0.78838	0.77665	0.62854	2.51416	35.1982
		0.85825	5.28982	4.75761	4.81347	4.95363	69.3509		0.85825	0.60955	1.38145	0.99601	0.99567	3.98268	55.7575
		0.92427	5.5787	5.0101	4.7447	5.11117	71.5563		0.92427	1.14128	1.57871	1.38151	1.36717	5.46867	76.5613
		0.99029	5.71547	5.18032	4.84904	5.24828	73.4759		0.99029	1.29729	1.4798	1.3403	1.37246	5.48985	76.8579
		1.05631	5.74643	4.36774	4.30945	4.80787	67.3102		1.05631	1.37764	1.20819	1.15372	1.24652	4.98607	69.8049
		1.12232	5.03397	3.84743	3.82832	4.23657	59.312		1.12232	1.13526	0.84943	0.86592	0.950203	3.80081	53.2114
		1.18834	4.0726	3.3206	3.47465	3.62262	50.7166		1.18834	0.74291	0.47929	0.7222	0.648133	2.59253	36.2955
		1.25436	3.94811	3.21743	3.21322	3.45959	48.4342		1.25436	0.64679	0.55245	0.63712	0.61212	2.44848	34.2787
		1.32038	3.9224	3.15826	3.48722	3.52263	49.3168		1.32038	0.59352	0.4395	0.60563	0.546217	2.18487	30.5881
		1.3864	4.00893	3.42957	3.50346	3.64732	51.0625		1.3864	0.61692	0.37068	0.44757	0.47839	1.91356	26.7898
		1.45242	4.24976	3.73539	3.78423	3.92313	54.9238		1.45242	0.48804	0.49212	0.51897	0.49971	1.99884	27.9838
		1.51844	4.3987	3.62043	3.66814	3.89576	54.5406		1.51844	0.65853	0.62372	0.67867	0.65364	2.61456	36.6038
		1.58446	4.62959	4.10887	3.82209	4.18685	58.6159		1.58446	0.71902	0.74073	0.61082	0.69019	2.76076	38.6506
		1.65048	5.48947	4.8687	4.1114	4.82319	67.5247		1.65048	1.1857	0.86884	0.80889	0.954477	3.81791	53.4507
		1.7165	6.44679	5.59744	4.86702	5.63708	78.9192		1.7165	1.87766	1.25712	1.00697	1.38058	5.52233	77.3127
		1.78252	6.55438	5.66751	5.58061	5.93417	83.0783		1.78252	1.67301	1.58561	1.20448	1.4877	5.9508	83.3112
		1.84853	5.8186	5.43422	5.91814	5.72365	80.1311		1.84853	1.37059	1.69182	1.62063	1.56101	6.24405	87.4167
		1.91455	4.88509	5.19846	6.2395	5.44102	76.1742		1.91455	0.57808	1.1374	1.40326	1.03958	4.15832	58.2165
		1.98057	3.5311	4.56751	5.35543	4.48468	62.7855		1.98057	0.13134	0.72623	0.79734	0.551637	2.20655	30.8917
		2.04659	2.94532	3.62888	4.22739	3.60053	50.4074		2.04659	0.00637	0.26862	0.59293	0.289307	1.15723	16.2012
		2.11261	2.73294	2.81232	3.56482	3.03669	42.5137		2.11261	0.00514	0.00484	0.19777	0.06925	0.277	3.878
		2.17863	2.65478	2.6124	2.71641	2.6612	37.2568		2.17863	0.02857	0	0.01533	0.0146333	0.0585333	0.819467
		2.24465	2.3404	2.32326	2.12128	2.26165	31.6631		2.24465	0	0	0.022	0.00733333	0.0293333	0.410667
		2.31067	2.33511	2.25249	2.03119	2.20626	30.8877		2.31067	0.01131	0	0.0093	0.00687	0.02748	0.38472
		2.37669	2.08644	1.98147	1.99952	2.02248	28.3147		2.37669	0.00835	0	0	0.00278333	0.0111333	0.155867
		2.44271	2.04412	2.0051	1.96918	2.00613	28.0859		2.44271	0.02673	0.00064	0	0.00912333	0.0364933	0.510907
		2.50873	1.67796	2.02509	1.73077	1.81127	25.3578		2.50873	0	0.02913	0	0.00971	0.03884	0.54376
		2.57474	1.60411	1.75699	1.6459	1.669	23.366		2.57474	0	0.005	0	0.00166667	0.00666667	0.0933333
		2.64076	1.51704	1.54422	1.81056	1.62394	22.7352		2.64076	0	0	0	0	0	0
		2.70678	1.32291	1.3281	1.67625	1.44242	20.1939		2.70678	0	0	0	0	0	0
		2.7728	1.1378	1.38033	1.80613	1.44142	20.1799		2.7728	0	0	0	0	0	0
		larvae013
		red channel (par-6-mkate)	measurements				multiply to fit to y-axis		yellow channel (par-3-zf1-yfp)	measurements					multiply to fit to y-axis
		distance (microns)	m1	m2	m3		*14		distance (microns)	m1	m2	m3			*14
		0	1.11333	1.13203	1.93927	1.39488	19.5283		0	0.00187	0	0	0.000623333	0.00249333	0.0349067
		0.06602	1.29095	1.22409	2.24135	1.58546	22.1965		0.06602	0.03526	0	0	0.0117533	0.0470133	0.658187
		0.13204	1.14395	1.79122	2.32506	1.75341	24.5477		0.13204	0.00221	0	0	0.000736667	0.00294667	0.0412533
		0.19806	1.1331	1.86806	2.57582	1.85899	26.0259		0.19806	0	0.04531	0	0.0151033	0.0604133	0.845787
		0.26408	1.06373	1.68115	2.74452	1.8298	25.6172		0.26408	0	0.02729	0.00269	0.00999333	0.0399733	0.559627
		0.3301	1.08045	1.76636	2.94052	1.92911	27.0075		0.3301	0	0.07296	0.05937	0.04411	0.17644	2.47016
		0.39611	1.26241	1.7535	3.54404	2.18665	30.6131		0.39611	0	0.02029	0.06531	0.0285333	0.114133	1.59787
		0.46213	1.45093	1.91087	4.25953	2.54044	35.5662		0.46213	0	0	0.19481	0.0649367	0.259747	3.63645
		0.52815	1.64004	1.93554	5.46692	3.01417	42.1983		0.52815	0.0014	0	0.52999	0.17713	0.70852	9.91928
		0.59417	2.09669	2.19037	6.33552	3.54086	49.572		0.59417	0.1255	0.00544	0.98232	0.371087	1.48435	20.7809
		0.66019	2.7528	2.33786	6.3861	3.82559	53.5582		0.66019	0.32897	0.04485	1.21398	0.529267	2.11707	29.6389
		0.72621	3.1419	2.51281	6.34706	4.00059	56.0083		0.72621	0.61432	0.08807	1.39609	0.699493	2.79797	39.1716
		0.79223	3.14904	2.84752	5.78166	3.92607	54.965		0.79223	1.09558	0.20851	1.33205	0.878713	3.51485	49.2079
		0.85825	3.31155	3.46919	5.17	3.98358	55.7701		0.85825	1.2172	0.51081	1.40754	1.04518	4.18073	58.5303
		0.92427	3.20615	4.17343	4.6016	3.99373	55.9122		0.92427	1.17454	1.07573	0.93732	1.06253	4.25012	59.5017
		0.99029	3.33586	4.29877	3.9649	3.86651	54.1311		0.99029	0.85966	1.1802	0.76117	0.933677	3.73471	52.2859
		1.05631	2.80455	4.03036	3.91854	3.58448	50.1828		1.05631	0.59551	1.18154	0.62815	0.801733	3.20693	44.8971
		1.12232	2.61062	3.46377	3.87346	3.31595	46.4233		1.12232	0.45601	0.54149	0.52912	0.508873	2.03549	28.4969
		1.18834	2.38388	2.92714	3.28094	2.86399	40.0958		1.18834	0.37963	0.39735	0.43131	0.402763	1.61105	22.5547
		1.25436	1.91224	2.60696	3.35947	2.62622	36.7671		1.25436	0.17601	0.28229	0.35471	0.271003	1.08401	15.1762
		1.32038	1.80052	2.34282	3.13619	2.42651	33.9711		1.32038	0.11886	0.32077	0.3259	0.255177	1.02071	14.2899
		1.3864	1.96427	2.05021	3.17383	2.3961	33.5454		1.3864	0.16474	0.30918	0.3088	0.260907	1.04363	14.6108
		1.45242	2.21956	2.13589	3.67093	2.67546	37.4564		1.45242	0.13962	0.23446	0.26717	0.21375	0.855	11.97
		1.51844	2.21043	2.23067	3.68301	2.70804	37.9125		1.51844	0.17633	0.28174	0.35499	0.27102	1.08408	15.1771
		1.58446	2.52073	2.6035	3.99994	3.04139	42.5795		1.58446	0.11772	0.46417	0.29979	0.293893	1.17557	16.458
		1.65048	2.45073	2.88756	4.34566	3.22798	45.1918		1.65048	0.29638	0.50555	0.32915	0.377027	1.50811	21.1135
		1.7165	2.59047	3.09546	4.69925	3.46173	48.4642		1.7165	0.53353	0.68572	0.49541	0.571553	2.28621	32.007
		1.78252	3.00864	3.54814	5.40622	3.98767	55.8273		1.78252	0.94406	0.95566	0.60953	0.836417	3.34567	46.8393
		1.84853	3.61853	3.75925	5.74315	4.37364	61.231		1.84853	1.12089	1.08576	0.84952	1.01872	4.07489	57.0485
		1.91455	4.38137	3.33005	6.01069	4.57404	64.0365		1.91455	1.25889	0.99977	1.07846	1.11237	4.44949	62.2929
		1.98057	4.38934	3.23962	6.37614	4.66837	65.3571		1.98057	1.11204	0.68845	1.12616	0.97555	3.9022	54.6308
		2.04659	4.19401	2.87683	6.34018	4.47034	62.5848		2.04659	0.79549	0.23735	1.01836	0.683733	2.73493	38.2891
		2.11261	3.06585	2.17969	5.66602	3.63719	50.9206		2.11261	0.45395	0.04279	1.31095	0.602563	2.41025	33.7435
		2.17863	2.49864	2.02742	5.29703	3.27436	45.8411		2.17863	0.06841	0.0329	1.02278	0.374697	1.49879	20.983
		2.24465	2.30201	1.94096	5.2551	3.16602	44.3243		2.24465	0	0.00307	0.61398	0.205683	0.822733	11.5183
		2.31067	1.73108	1.48502	4.83382	2.68331	37.5663		2.31067	0	0	0.30414	0.10138	0.40552	5.67728
		2.37669	1.65309	1.37361	4.28513	2.43728	34.1219		2.37669	0.02375	0	0.14739	0.0570467	0.228187	3.19461
		2.44271	1.64206	1.1877	4.15055	2.32677	32.5748		2.44271	0.0098	0	0.10486	0.03822	0.15288	2.14032
		2.50873	1.64845	1.10262	4.1554	2.30216	32.2302		2.50873	0	0	0.02312	0.00770667	0.0308267	0.431573
		2.57474	1.43659	1.09268	4.23575	2.25501	31.5701		2.57474	0	0	0.02935	0.00978333	0.0391333	0.547867
		2.64076	1.06081	1.12885	4.4076	2.19909	30.7872		2.64076	0	0	0.05015	0.0167167	0.0668667	0.936133
		2.70678	0.93887	0.97661	4.19152	2.03567	28.4993		2.70678	0	0	0.12421	0.0414033	0.165613	2.31859
		2.7728	0.91926	0.89926	3.95043	1.92298	26.9218		2.7728	0	0	0.06163	0.0205433	0.0821733	1.15043

## Sheet: Figure 6D - source data
		Figure 6D - source data. Fluorescent intensity values for line trace measurements of PAR-3::ZF1::YFP; PAR-6::mKate (heat shock ZIF-1)
		par-3(xn59); par-6(cp60); xnEx501[hsp-16.41p::zif-1; t28h11.8p::CFP, pRF4]
		image017
		red channel (par-6-mkate)	measurements				multiply to fit to y-axis		yellow channel (par-3-zf1-yfp)	measurements					multiply to fit to y-axis
		distance (microns)	m1	m2	m3	avg	*14		distance (microns)	m1	m2	m3	avg	normalized to red channel	*14
		0	1.00121	1.25947	1.07516	1.11195	15.5673		0	0	0	0	0	0	0
		0.06602	1.37137	1.41023	1.38014	1.38725	19.4215		0.06602	0	0	0	0	0	0
		0.13204	1.37814	1.5392	1.59485	1.50406	21.0569		0.13204	0	0	0	0	0	0
		0.19806	1.4878	1.42527	1.59174	1.5016	21.0224		0.19806	0	0	0	0	0	0
		0.26408	1.80896	1.65263	1.43982	1.6338	22.8732		0.26408	0	0	0	0	0	0
		0.3301	1.70715	1.80316	1.71165	1.74065	24.3691		0.3301	0	0	0	0	0	0
		0.39611	1.88344	1.74872	1.7512	1.79445	25.1223		0.39611	0	0	0	0	0	0
		0.46213	1.94426	1.63172	1.63874	1.73824	24.3354		0.46213	0	0	0	0	0	0
		0.52815	2.01638	2.0072	1.61912	1.8809	26.3326		0.52815	0	0	0	0	0	0
		0.59417	1.69002	2.00475	1.82247	1.83908	25.7471		0.59417	0	0	0	0	0	0
		0.66019	1.84794	1.92529	1.95737	1.9102	26.7428		0.66019	0	0	0	0	0	0
		0.72621	2.13613	2.06273	2.05668	2.08518	29.1925		0.72621	0.007442	0	0	0.00248067	0.00992267	0.138917
		0.79223	2.31225	2.33646	1.8687	2.17247	30.4146		0.79223	0.025222	0	0.004987	0.0100697	0.0402787	0.563901
		0.85825	2.33679	2.08304	1.86223	2.09402	29.3163		0.85825	0.01483	0	0.044758	0.0198627	0.0794507	1.11231
		0.92427	2.27393	2.29798	1.63035	2.06742	28.9439		0.92427	0.019577	0	0.018247	0.012608	0.050432	0.706048
		0.99029	2.18889	2.09851	1.65687	1.98142	27.7399		0.99029	0.021236	0.000353	0.012036	0.0112083	0.0448333	0.627667
		1.05631	1.87428	2.00839	1.77109	1.88459	26.3842		1.05631	0.091742	0.029085	0.016573	0.0458	0.1832	2.5648
		1.12232	1.84326	1.8423	2.02357	1.90304	26.6426		1.12232	0.103585	0.004194	0.014503	0.0407607	0.163043	2.2826
		1.18834	1.83045	1.64814	2.03478	1.83779	25.7291		1.18834	0.119584	0	0.014607	0.0447303	0.178921	2.5049
		1.25436	1.55755	1.76871	1.87493	1.73373	24.2722		1.25436	0.060757	0.026874	0.00592	0.0311837	0.124735	1.74629
		1.32038	1.61478	1.66111	1.46261	1.5795	22.113		1.32038	0.068307	0.056831	0.041022	0.0553867	0.221547	3.10165
		1.3864	1.53356	1.67379	1.38003	1.52913	21.4078		1.3864	0.090841	0.049568	0.042117	0.060842	0.243368	3.40715
		1.45242	1.31369	1.59239	1.41008	1.43872	20.1421		1.45242	0.056576	0.073313	0.090761	0.07355	0.2942	4.1188
		1.51844	1.68446	1.60764	1.44832	1.58014	22.122		1.51844	0.062541	0.086746	0.132213	0.0938333	0.375333	5.25467
		1.58446	1.73099	1.7394	1.47427	1.64822	23.0751		1.58446	0.036133	0.10598	0.047491	0.0632013	0.252805	3.53927
		1.65048	2.00055	1.84229	1.64261	1.82848	25.5988		1.65048	0.047245	0.016114	0.081677	0.0483453	0.193381	2.70734
		1.7165	2.23932	2.06001	1.73617	2.01183	28.1657		1.7165	0.087449	0.067356	0.085198	0.080001	0.320004	4.48006
		1.78252	2.51036	1.905	2.17889	2.19808	30.7732		1.78252	0.002243	0.076001	0.05921	0.045818	0.183272	2.56581
		1.84853	2.45144	2.00755	2.09338	2.18412	30.5777		1.84853	0.011214	0.031706	0.05638	0.0331	0.1324	1.8536
		1.91455	2.49163	1.93038	2.32007	2.24736	31.463		1.91455	0.036143	0.043089	0.107644	0.062292	0.249168	3.48835
		1.98057	2.40766	1.83276	2.26182	2.16741	30.3438		1.98057	0.04277	0.021259	0.052235	0.0387547	0.155019	2.17026
		2.04659	2.21607	2.12939	2.21287	2.18611	30.6055		2.04659	0.134033	0.029945	0.019768	0.0612487	0.244995	3.42993
		2.11261	2.17437	2.12992	2.15533	2.15321	30.1449		2.11261	0.150275	0.00175	0.021218	0.0577477	0.230991	3.23387
		2.17863	2.28067	1.88875	2.38458	2.18467	30.5853		2.17863	0.183812	0.00061	0.029821	0.0714143	0.285657	3.9992
		2.24465	2.23742	2.2284	2.08773	2.18452	30.5832		2.24465	0.14306	0.0049	0.001659	0.049873	0.199492	2.79289
		2.31067	2.17311	2.09877	2.00832	2.0934	29.3076		2.31067	0.131696	0	0	0.0438987	0.175595	2.45833
		2.37669	2.30241	2.06866	2.28942	2.22016	31.0823		2.37669	0.111356	0	0	0.0371187	0.148475	2.07865
		2.44271	2.122	2.28783	2.16963	2.19315	30.7041		2.44271	0.060508	0	0.004849	0.0217857	0.0871427	1.22
		2.50873	2.20077	2.03428	1.96281	2.06595	28.9233		2.50873	0.054762	0	0.032121	0.028961	0.115844	1.62182
		2.57474	2.02848	1.90637	1.70908	1.88131	26.3383		2.57474	0.000259	0	0	8.63333e-05	0.000345333	0.00483467
		2.64076	2.01912	1.77559	1.83885	1.87785	26.2899		2.64076	0.002513	0	0	0.000837667	0.00335067	0.0469093
		2.70678	2.2774	1.85477	1.45	1.86072	26.0501		2.70678	0.057281	0	0	0.0190937	0.0763747	1.06925
		2.7728	2.34928	1.60598	1.93485	1.96337	27.4872		2.7728	0.010931	0	0	0.00364367	0.0145747	0.204045
		image014
		red channel (par-6-mkate)	measurements				multiply to fit to y-axis		yellow channel (par-3-zf1-yfp)	measurements					multiply to fit to y-axis
		distance (microns)	m1	m2	m3	avg	*14		distance (microns)	m1	m2	m3	avg	normalized to red channel	*14
		0	2.43644	2.1908	2.93894	2.52206	35.3088		0	0.022349	0	0.0256488	0.0159993	0.0639971	0.895959
		0.06602	2.70621	2.44942	2.88028	2.67864	37.5009		0.06602	0.0129739	0	0.0471151	0.0200297	0.0801187	1.12166
		0.13204	2.85559	2.62796	3.26567	2.91641	40.8297		0.13204	0	0	0.0024502	0.000816733	0.00326693	0.0457371
		0.19806	2.78931	2.39289	3.2273	2.80317	39.2443		0.19806	0	0	0	0	0	0
		0.26408	2.7489	2.33943	3.07524	2.72119	38.0967		0.26408	0	0	0.0021112	0.000703733	0.00281493	0.0394091
		0.3301	2.82063	2.59204	3.05856	2.82374	39.5324		0.3301	0	0	0.0319761	0.0106587	0.0426348	0.596887
		0.39611	2.76179	2.4482	3.26846	2.82615	39.5661		0.39611	0	0	0.0023384	0.000779467	0.00311787	0.0436501
		0.46213	3.17615	2.57798	3.19089	2.98167	41.7434		0.46213	0	0	0	0	0	0
		0.52815	3.09442	2.74176	3.05254	2.96291	41.4807		0.52815	0	0.0107464	0.0258088	0.0121851	0.0487403	0.682364
		0.59417	2.93089	2.79598	3.08092	2.93593	41.103		0.59417	0	0.0550513	0.0071529	0.0207347	0.0829389	1.16115
		0.66019	3.26167	3.02356	3.203	3.16274	44.2784		0.66019	0	0.0034045	0	0.00113483	0.00453933	0.0635507
		0.72621	3.30317	3.1639	3.51827	3.32845	46.5983		0.72621	0	0	0.0019132	0.000637733	0.00255093	0.0357131
		0.79223	2.98585	3.00723	3.35786	3.11698	43.6377		0.79223	0	0.0030051	0	0.0010017	0.0040068	0.0560952
		0.85825	2.81907	3.07857	3.18267	3.02677	42.3748		0.85825	0	0.0013407	0.0024458	0.00126217	0.00504867	0.0706813
		0.92427	3.02386	3.23173	2.58448	2.94669	41.2537		0.92427	0.0013378	0	0.0384045	0.0132474	0.0529897	0.741856
		0.99029	2.85983	2.63803	2.28981	2.59589	36.3425		0.99029	0.0331697	0.0061403	0.02969	0.023	0.092	1.288
		1.05631	2.42047	2.5255	1.85291	2.26629	31.7281		1.05631	0.0295558	0	0	0.00985193	0.0394077	0.551708
		1.12232	2.43349	2.17236	1.70466	2.1035	29.449		1.12232	0	0	0	0	0	0
		1.18834	2.14757	2.05945	1.46584	1.89095	26.4733		1.18834	0	0.0267831	0	0.0089277	0.0357108	0.499951
		1.25436	1.98299	1.91561	1.72687	1.87516	26.2522		1.25436	0	0.00413	0	0.00137667	0.00550667	0.0770933
		1.32038	2.08426	1.5373	1.5582	1.72659	24.1722		1.32038	0.0018208	0	0	0.000606933	0.00242773	0.0339883
		1.3864	1.94336	1.43274	1.34934	1.57515	22.0521		1.3864	0.0547395	0	0	0.0182465	0.072986	1.0218
		1.45242	2.24909	1.56074	1.36092	1.72358	24.1302		1.45242	0.0203168	0	0	0.00677227	0.0270891	0.379247
		1.51844	1.9665	1.74964	1.42218	1.71277	23.9788		1.51844	0.0044751	0	0	0.0014917	0.0059668	0.0835352
		1.58446	2.15174	1.63158	1.35463	1.71265	23.9771		1.58446	0.0341818	0	8.64e-05	0.0114227	0.0456909	0.639673
		1.65048	2.60629	1.93735	1.59841	2.04735	28.6629		1.65048	0.0251649	0	0	0.0083883	0.0335532	0.469745
		1.7165	2.72639	2.31153	1.80788	2.28193	31.9471		1.7165	0.0325428	0	0.0190213	0.017188	0.0687521	0.96253
		1.78252	3.0818	2.64155	1.99549	2.57295	36.0213		1.78252	0.0189172	0	0.0502325	0.0230499	0.0921996	1.29079
		1.84853	3.41792	3.01152	2.68624	3.03856	42.5398		1.84853	0.0919898	0	0.0342797	0.0420898	0.168359	2.35703
		1.91455	3.44314	3.14329	2.85605	3.14749	44.0649		1.91455	0.0336182	0	0	0.0112061	0.0448243	0.62754
		1.98057	3.23017	2.92723	3.29403	3.15048	44.1067		1.98057	0	0	0	0	0	0
		2.04659	3.37376	2.92103	3.10691	3.1339	43.8746		2.04659	0	0	0	0	0	0
		2.11261	3.25743	2.91634	3.41878	3.19752	44.7652		2.11261	0.0001442	0	0	4.80667e-05	0.000192267	0.00269173
		2.17863	2.98318	2.80503	3.25505	3.01442	42.2019		2.17863	0.0284005	0	0	0.00946683	0.0378673	0.530143
		2.24465	2.87468	2.76401	3.51095	3.04988	42.6983		2.24465	0.0028342	0	0	0.000944733	0.00377893	0.0529051
		2.31067	2.78562	2.79344	3.60299	3.06068	42.8496		2.31067	0.0003546	0	0	0.0001182	0.0004728	0.0066192
		2.37669	3.01038	2.75852	3.5698	3.1129	43.5806		2.37669	0.0279269	0	0	0.00930897	0.0372359	0.521302
		2.44271	2.84693	2.46031	3.37401	2.89375	40.5125		2.44271	0.0061021	0	0	0.00203403	0.00813613	0.113906
		2.50873	2.65933	2.66934	3.05009	2.79292	39.1009		2.50873	0.0005178	0	0	0.0001726	0.0006904	0.0096656
		2.57474	2.53263	2.52431	3.14098	2.73264	38.257		2.57474	0.0295693	0	0	0.00985643	0.0394257	0.55196
		2.64076	2.51522	2.32828	3.21002	2.68451	37.5831		2.64076	0.0046641	0	0	0.0015547	0.0062188	0.0870632
		2.70678	2.53425	1.93854	3.10051	2.52443	35.3421		2.70678	0.0046105	0	0	0.00153683	0.00614733	0.0860627
		2.7728	2.26478	1.78843	3.14459	2.39927	33.5897		2.7728	0.0616391	0	0	0.0205464	0.0821855	1.1506
		image011
		red channel (par-6-mkate)	measurements				multiply to fit to y-axis		yellow channel (par-3-zf1-yfp)	measurements					multiply to fit to y-axis
		distance (microns)	m1	m2	m3	avg	*14		distance (microns)	m1	m2	m3	avg	normalized to red channel	*14
		0	2.33248	2.22972	1.83145	2.13122	29.837		0	0	0	0	0	0	0
		0.06602	2.67599	2.29306	2.00101	2.32335	32.5269		0.06602	0	0	0	0	0	0
		0.13204	2.53196	2.31441	2.08382	2.31006	32.3409		0.13204	0	0	0	0	0	0
		0.19806	2.61783	2.55546	1.91551	2.36293	33.0811		0.19806	0	0	0	0	0	0
		0.26408	2.68334	2.79887	2.16369	2.54863	35.6809		0.26408	0	0	0	0	0	0
		0.3301	2.75098	2.87956	2.2001	2.61021	36.543		0.3301	0	0	0	0	0	0
		0.39611	3.13281	3.49798	2.11021	2.91367	40.7913		0.39611	0	0	0	0	0	0
		0.46213	3.17525	3.53481	2.07883	2.92963	41.0148		0.46213	0	0.013481	0	0.00449367	0.0179747	0.251645
		0.52815	3.23481	3.40546	1.94127	2.86051	40.0472		0.52815	0	0.049911	0	0.016637	0.066548	0.931672
		0.59417	3.36263	3.56643	2.09465	3.0079	42.1106		0.59417	0	0.000495	0	0.000165	0.00066	0.00924
		0.66019	3.47105	3.20391	1.91998	2.86498	40.1097		0.66019	0	0.063828	0	0.021276	0.085104	1.19146
		0.72621	3.5182	3.2528	2.12133	2.96411	41.4975		0.72621	0	0.091388	0	0.0304627	0.121851	1.70591
		0.79223	3.52186	3.10541	2.24742	2.95823	41.4152		0.79223	0	0.065641	0.004423	0.0233547	0.0934187	1.30786
		0.85825	3.40849	2.88309	2.38358	2.89172	40.4841		0.85825	0.018631	0.131749	0.087527	0.0793023	0.317209	4.44093
		0.92427	3.50881	2.69137	2.04788	2.74935	38.4909		0.92427	0.132398	0.051102	0.119603	0.101034	0.404137	5.65792
		0.99029	3.40418	2.31759	1.95338	2.55838	35.8174		0.99029	0.104073	0.021551	0.053084	0.0595693	0.238277	3.33588
		1.05631	2.79399	1.90291	1.7288	2.1419	29.9866		1.05631	0.041527	0.028521	0.041882	0.03731	0.14924	2.08936
		1.12232	2.56922	1.77528	1.62056	1.98835	27.8369		1.12232	0.061183	0.025624	0.053156	0.0466543	0.186617	2.61264
		1.18834	2.58634	1.59513	1.48477	1.88875	26.4425		1.18834	0.003222	0.043069	0.000119	0.01547	0.06188	0.86632
		1.25436	2.50743	1.7707	1.62	1.96604	27.5246		1.25436	0	0.002833	0	0.000944333	0.00377733	0.0528827
		1.32038	2.26853	1.50977	1.44585	1.74138	24.3794		1.32038	0	0.036589	0	0.0121963	0.0487853	0.682995
		1.3864	2.2027	1.41896	1.26525	1.62897	22.8056		1.3864	0.006392	0.026414	0	0.0109353	0.0437413	0.612379
		1.45242	2.22169	1.41336	1.71872	1.78459	24.9843		1.45242	0.008557	0.008691	0	0.00574933	0.0229973	0.321963
		1.51844	2.27974	1.64203	1.64004	1.85394	25.9551		1.51844	0	0.053303	0	0.0177677	0.0710707	0.994989
		1.58446	2.23619	1.56474	1.75809	1.85301	25.9421		1.58446	0.029737	0.0004	0	0.0100457	0.0401827	0.562557
		1.65048	2.60633	1.66384	1.67526	1.98181	27.7453		1.65048	0.016244	0	0	0.00541467	0.0216587	0.303221
		1.7165	2.77386	2.08754	1.58274	2.14805	30.0727		1.7165	0.06419	0	0.051822	0.0386707	0.154683	2.16556
		1.78252	3.36954	2.30375	1.88118	2.51816	35.2542		1.78252	0.070619	0	0.008303	0.0263073	0.105229	1.47321
		1.84853	3.5475	2.51785	1.99898	2.68811	37.6335		1.84853	0.044079	0.003752	0.023353	0.023728	0.094912	1.32877
		1.91455	3.83875	2.89888	2.20957	2.9824	41.7536		1.91455	0.025064	0.030613	0.011433	0.02237	0.08948	1.25272
		1.98057	3.45585	3.25388	2.30694	3.00556	42.0778		1.98057	0.032644	0.009925	0	0.0141897	0.0567587	0.794621
		2.04659	3.37458	3.51818	2.43585	3.10954	43.5335		2.04659	0.010482	0.077738	0	0.0294067	0.117627	1.64677
		2.11261	3.08868	3.47365	2.33228	2.96487	41.5082		2.11261	0	0.101203	0	0.0337343	0.134937	1.88912
		2.17863	2.73729	3.43273	2.2857	2.81857	39.46		2.17863	0	0.049248	0	0.016416	0.065664	0.919296
		2.24465	3.0825	3.27907	2.51566	2.95908	41.4271		2.24465	0	0.018239	0	0.00607967	0.0243187	0.340461
		2.31067	3.15429	2.98128	2.32843	2.82133	39.4987		2.31067	0	0.030007	0	0.0100023	0.0400093	0.560131
		2.37669	3.23143	2.93241	2.06112	2.74165	38.3831		2.37669	0	0.003633	0	0.001211	0.004844	0.067816
		2.44271	2.97731	2.72427	2.05251	2.5847	36.1858		2.44271	0	0	0	0	0	0
		2.50873	2.67822	2.70371	2.04617	2.47603	34.6645		2.50873	0	0	0	0	0	0
		2.57474	2.5978	2.30683	1.99135	2.29866	32.1812		2.57474	0	0	0	0	0	0
		2.64076	2.49996	2.39307	1.56472	2.15258	30.1362		2.64076	0	0	0	0	0	0
		2.70678	2.51346	2.32832	1.58825	2.14334	30.0068		2.70678	0	0	0	0	0	0
		2.7728	2.06984	1.82026	1.56249	1.81753	25.4454		2.7728	0	0	0	0	0	0
		image007
		red channel (par-6-mkate)	measurements				multiply to fit to y-axis		yellow channel (par-3-zf1-yfp)	measurements					multiply to fit to y-axis
		distance (microns)	m1	m2	m3	avg	*14		distance (microns)	m1	m2	m3	avg	normalized to red channel	*14
		0	1.54142	1.10335	1.32826	1.32434	18.5408		0	0.0072285	0	0	0.0024095	0.009638	0.134932
		0.06602	1.61165	1.40005	1.56305	1.52492	21.3488		0.06602	0	0	0	0	0	0
		0.13204	1.78826	1.48539	1.77772	1.68379	23.5731		0.13204	0	0	0	0	0	0
		0.19806	2.2052	1.46986	1.6627	1.77925	24.9095		0.19806	0	0	0.0100263	0.0033421	0.0133684	0.187158
		0.26408	2.12769	1.45362	1.82029	1.80053	25.2075		0.26408	0	0	0.0207676	0.00692253	0.0276901	0.387662
		0.3301	1.97088	1.66683	1.69264	1.77678	24.875		0.3301	0	0	0	0	0	0
		0.39611	1.80266	1.75364	1.84986	1.80205	25.2287		0.39611	0	0	0	0	0	0
		0.46213	1.91607	1.71733	1.81623	1.81654	25.4316		0.46213	0	0	0	0	0	0
		0.52815	2.13221	1.77396	1.96392	1.9567	27.3938		0.52815	0	0	0	0	0	0
		0.59417	2.19546	2.09532	2.11529	2.13536	29.895		0.59417	0	0	0	0	0	0
		0.66019	2.33452	2.0058	2.15748	2.16593	30.3231		0.66019	0	0	0	0	0	0
		0.72621	2.42191	2.07364	1.98613	2.16056	30.2478		0.72621	0	0	0	0	0	0
		0.79223	2.53238	2.17351	2.15953	2.28847	32.0386		0.79223	0	0	0	0	0	0
		0.85825	2.19857	2.33999	2.49261	2.34372	32.8121		0.85825	0.0064667	0	0	0.00215557	0.00862227	0.120712
		0.92427	2.3491	2.15932	2.5657	2.35804	33.0126		0.92427	0.0269511	0	0.0436251	0.0235254	0.0941016	1.31742
		0.99029	2.31743	2.11561	2.47735	2.30346	32.2485		0.99029	0.0001757	0	0.0586084	0.0195947	0.0783788	1.0973
		1.05631	2.06906	2.2949	2.18359	2.18252	30.5552		1.05631	0	0	0.0265206	0.0088402	0.0353608	0.495051
		1.12232	1.86678	1.98191	2.12098	1.98989	27.8585		1.12232	0	0	0.0321613	0.0107204	0.0428817	0.600344
		1.18834	1.83479	1.61507	1.89337	1.78108	24.9351		1.18834	0	0.0010236	0.0039428	0.00165547	0.00662187	0.0927061
		1.25436	1.91134	1.49957	1.60361	1.67151	23.4011		1.25436	0	0.0021384	0	0.0007128	0.0028512	0.0399168
		1.32038	1.5259	1.46541	1.64447	1.54526	21.6336		1.32038	0	0.0368499	0	0.0122833	0.0491332	0.687865
		1.3864	1.34492	1.28554	1.84163	1.4907	20.8698		1.3864	0	0.0033167	0	0.00110557	0.00442227	0.0619117
		1.45242	1.34831	1.26245	1.68289	1.43122	20.037		1.45242	0	0	0	0	0	0
		1.51844	1.49015	1.34092	1.58621	1.47243	20.614		1.51844	0	0	0	0	0	0
		1.58446	1.52094	1.41085	2.055	1.66226	23.2717		1.58446	0	0	0	0	0	0
		1.65048	1.60518	1.63008	2.06475	1.76667	24.7334		1.65048	0.0150165	0	0.0130597	0.00935873	0.0374349	0.524089
		1.7165	1.54582	2.00646	2.28443	1.94557	27.238		1.7165	0.0566246	0	0.0195425	0.025389	0.101556	1.42179
		1.78252	1.67272	2.00866	2.52708	2.06949	28.9728		1.78252	0.0039095	0	0.0189544	0.0076213	0.0304852	0.426793
		1.84853	1.94169	2.11128	2.17155	2.07484	29.0478		1.84853	0	0	0.0449939	0.014998	0.0599919	0.839886
		1.91455	2.1522	1.9071	2.19488	2.08473	29.1862		1.91455	0.0383192	0	0.0667116	0.0350103	0.140041	1.96057
		1.98057	2.43319	1.89676	1.97851	2.10282	29.4395		1.98057	0.0943235	0	0.0384978	0.0442738	0.177095	2.47933
		2.04659	2.02721	2.0232	2.08068	2.0437	28.6118		2.04659	0.0796095	0	0.0005705	0.0267267	0.106907	1.49669
		2.11261	2.22961	1.96723	2.33685	2.1779	30.4906		2.11261	0.0254273	0	0	0.00847577	0.0339031	0.474643
		2.17863	2.13085	2.00359	2.38893	2.17446	30.4424		2.17863	0	0	0	0	0	0
		2.24465	2.03226	2.20899	2.44043	2.22723	31.1812		2.24465	0	0	0	0	0	0
		2.31067	1.90273	2.297	2.27319	2.15764	30.207		2.31067	0.0061517	0	0	0.00205057	0.00820227	0.114832
		2.37669	1.9891	2.1072	2.55776	2.21802	31.0523		2.37669	0.0283783	0	0	0.00945943	0.0378377	0.529728
		2.44271	1.98593	2.22834	2.65454	2.2896	32.0544		2.44271	0	0	0.0044645	0.00148817	0.00595267	0.0833373
		2.50873	1.87929	1.92769	2.37134	2.05944	28.8322		2.50873	0	0	0.0326322	0.0108774	0.0435096	0.609134
		2.57474	1.99845	2.08006	2.16502	2.08118	29.1365		2.57474	0	0	0.0015351	0.0005117	0.0020468	0.0286552
		2.64076	1.88497	2.06185	2.25514	2.06732	28.9425		2.64076	0	0	0	0	0	0
		2.70678	1.47672	1.85169	2.19305	1.84049	25.7668		2.70678	0	0	0	0	0	0
		2.7728	1.51644	1.96023	2.26181	1.91283	26.7796		2.7728	0	0	0	0	0	0
		image008
		red channel (par-6-mkate)	measurements				multiply to fit to y-axis		yellow channel (par-3-zf1-yfp)	measurements					multiply to fit to y-axis
		distance (microns)	m1	m2	m3	avg	*14		distance (microns)	m1	m2	m3	avg	normalized to red channel	*14
		0	2.21345	2.31351	2.17652	2.23449	31.2829		0	0	0.0233784	0	0.0077928	0.0311712	0.436397
		0.06602	2.63536	2.30538	2.28824	2.40966	33.7352		0.06602	0	0.0086085	0	0.0028695	0.011478	0.160692
		0.13204	2.39001	2.33162	2.26167	2.32777	32.5887		0.13204	0.0298095	0	0.0002146	0.010008	0.0400321	0.56045
		0.19806	2.93688	2.52078	2.45737	2.63834	36.9368		0.19806	0.0024099	0	0.0279305	0.0101135	0.0404539	0.566354
		0.26408	3.16091	2.83963	2.65957	2.8867	40.4138		0.26408	0.0232694	0	0.0047975	0.00935563	0.0374225	0.523915
		0.3301	3.04367	2.80139	2.91691	2.92066	40.8892		0.3301	0.009924	0	0	0.003308	0.013232	0.185248
		0.39611	3.01027	3.12577	3.17059	3.10221	43.4309		0.39611	0	0	0	0	0	0
		0.46213	3.21145	2.94512	3.34216	3.16624	44.3274		0.46213	0	0	0	0	0	0
		0.52815	3.38152	2.75126	3.01187	3.04822	42.675		0.52815	0	0	0.0042192	0.0014064	0.0056256	0.0787584
		0.59417	3.15259	2.70747	3.42736	3.09581	43.3413		0.59417	0	0	0.0271326	0.0090442	0.0361768	0.506475
		0.66019	3.0986	2.97039	3.5132	3.19406	44.7169		0.66019	0	0	0	0	0	0
		0.72621	3.19526	3.02667	3.42453	3.21549	45.0168		0.72621	0	0	0.0221456	0.00738187	0.0295275	0.413385
		0.79223	3.16875	2.99521	3.02685	3.0636	42.8904		0.79223	0	0	0.0362179	0.0120726	0.0482905	0.676067
		0.85825	3.32467	3.225	3.17175	3.24047	45.3666		0.85825	0	0.0227815	0.0326142	0.0184652	0.0738609	1.03405
		0.92427	3.07986	2.84383	3.34854	3.09074	43.2704		0.92427	0	0.0237724	0.0784867	0.0340864	0.136345	1.90884
		0.99029	2.93214	2.60615	2.99737	2.84522	39.8331		0.99029	0	0.064463	0.0581851	0.0408827	0.163531	2.28943
		1.05631	2.8121	2.64681	3.03277	2.83056	39.6278		1.05631	0	0.0461501	0	0.0153834	0.0615335	0.861469
		1.12232	2.60158	2.55923	2.77144	2.64408	37.0172		1.12232	0	0.0380427	0	0.0126809	0.0507236	0.71013
		1.18834	1.97204	2.26744	2.38712	2.20887	30.9241		1.18834	0	0.0160118	0	0.00533727	0.0213491	0.298887
		1.25436	1.70707	2.30696	2.17	2.06134	28.8588		1.25436	0	0.0232122	0	0.0077374	0.0309496	0.433294
		1.32038	1.78639	2.21014	2.19916	2.06523	28.9132		1.32038	0	0	0	0	0	0
		1.3864	1.56061	2.15779	1.95169	1.89003	26.4604		1.3864	0	0	0	0	0	0
		1.45242	1.65243	1.85084	2.17109	1.89145	26.4803		1.45242	0	0	0	0	0	0
		1.51844	1.71435	2.1206	2.41782	2.08426	29.1796		1.51844	0	0	0	0	0	0
		1.58446	1.86432	2.39004	2.2682	2.17419	30.4386		1.58446	0.0180523	0	0	0.00601743	0.0240697	0.336976
		1.65048	2.01955	2.32154	2.65508	2.33206	32.6488		1.65048	0.0365688	0	0	0.0121896	0.0487584	0.682618
		1.7165	2.3465	3.0243	2.98668	2.78583	39.0016		1.7165	0.036569	0.0260884	0	0.0208858	0.0835432	1.1696
		1.78252	2.72034	3.38178	3.34304	3.14839	44.0774		1.78252	0.0077234	0.0066794	0.0402435	0.0182154	0.0728617	1.02006
		1.84853	3.09598	3.42697	3.29314	3.27203	45.8084		1.84853	0	0.0271638	0.0109787	0.0127142	0.0508567	0.711993
		1.91455	3.08801	3.08685	3.09551	3.09012	43.2617		1.91455	0	0.0048853	0	0.00162843	0.00651373	0.0911923
		1.98057	3.03394	3.14774	3.26878	3.15015	44.1021		1.98057	0	0	0.0005029	0.000167633	0.000670533	0.00938747
		2.04659	3.10259	2.969	3.21457	3.09539	43.3354		2.04659	0	0	0.0285325	0.00951083	0.0380433	0.532607
		2.11261	2.89909	2.84504	3.36071	3.03495	42.4893		2.11261	0	0	0.0033283	0.00110943	0.00443773	0.0621283
		2.17863	2.42734	3.16876	3.08275	2.89295	40.5013		2.17863	0	0	0	0	0	0
		2.24465	2.60229	2.99205	2.92133	2.83856	39.7398		2.24465	0	0	0	0	0	0
		2.31067	2.85236	2.89797	3.13528	2.96187	41.4662		2.31067	0	0	0.0068357	0.00227857	0.00911427	0.1276
		2.37669	2.74198	2.89433	2.98346	2.87326	40.2256		2.37669	0.0110723	0	0.0077462	0.00627283	0.0250913	0.351279
		2.44271	2.95675	2.87782	2.6931	2.84256	39.7958		2.44271	0.0199328	0.0058553	0	0.00859603	0.0343841	0.481378
		2.50873	2.85244	3.17272	2.74139	2.92218	40.9106		2.50873	0	0	0	0	0	0
		2.57474	2.68285	3.06029	2.94287	2.89534	40.5347		2.57474	0	0	0.0021753	0.0007251	0.0029004	0.0406056
		2.64076	2.66812	2.75737	2.75347	2.72632	38.1685		2.64076	0	0	0.0499391	0.0166464	0.0665855	0.932197
		2.70678	2.3571	2.21989	2.67135	2.41611	33.8256		2.70678	0	0	0.0050859	0.0016953	0.0067812	0.0949368
		2.7728	2.12391	1.87258	2.49341	2.1633	30.2862		2.7728	0	0.0194616	0	0.0064872	0.0259488	0.363283

## Sheet: Figure 6H - source data
		Figure 6H - source data. Fluorescent intensity values for line trace measurements of PAR-6::ZF1::YFP; PAR-3::mCherry (control)
		par-6(xn60); par-3(it301); xnEx496[t28h11.8p::CFP, pRF4] replicate3 070320
		image006
		red channel (par-3-mCh)	measurements					multiply to fit to y-axis		yellow channel (par-6-zf1-yfp)	measurements				multiply to fit to y-axis
		distance (microns)	m1	m2	m3	avg	normalized to yfp	*20		distance (microns)	m1	m2	m3	avg	*20
		0	0.53811	0.59953	0.39873	0.512123	0.614548	12.291		0	0.1217	0.32019	0.44515	0.29568	5.9136
		0.06602	0.474	0.48336	0.27268	0.410013	0.492016	9.84032		0.06602	0.12571	0.3538	0.41931	0.299607	5.99213
		0.13204	0.37365	0.34217	0.19014	0.301987	0.362384	7.24768		0.13204	0.11605	0.3393	0.25124	0.23553	4.7106
		0.19806	0.28279	0.52108	0.2269	0.34359	0.412308	8.24616		0.19806	0.1334	0.34042	0.44015	0.304657	6.09313
		0.26408	0.30245	0.67401	0.22863	0.401697	0.482036	9.64072		0.26408	0.27985	0.47121	0.58988	0.44698	8.9396
		0.3301	0.28862	0.75251	0.16039	0.400507	0.480608	9.61216		0.3301	0.39953	0.56154	0.70733	0.556133	11.1227
		0.39611	0.30351	0.70131	0.30378	0.4362	0.52344	10.4688		0.39611	0.56945	0.45576	0.77849	0.601233	12.0247
		0.46213	0.31736	0.79303	0.24518	0.451857	0.542228	10.8446		0.46213	0.93705	0.38716	0.95698	0.760397	15.2079
		0.52815	0.26393	0.55871	0.28905	0.370563	0.444676	8.89352		0.52815	1.24729	0.82751	1.20507	1.09329	21.8658
		0.59417	0.37427	0.62002	0.54389	0.512727	0.615272	12.3054		0.59417	1.74198	1.00821	1.46107	1.40375	28.0751
		0.66019	0.55976	0.62683	0.34626	0.51095	0.61314	12.2628		0.66019	2.56154	1.38965	1.50618	1.81912	36.3825
		0.72621	0.8021	0.86148	0.41785	0.69381	0.832572	16.6514		0.72621	3.29962	2.18552	2.28224	2.58913	51.7825
		0.79223	1.18576	0.93466	0.82348	0.9813	1.17756	23.5512		0.79223	3.82036	3.36221	2.86116	3.34791	66.9582
		0.85825	1.56162	1.56556	0.98675	1.37131	1.64557	32.9114		0.85825	4.30512	4.65556	3.43632	4.13233	82.6467
		0.92427	2.14474	2.06445	1.278	1.82906	2.19488	43.8975		0.92427	4.65291	5.68221	4.82606	5.05373	101.075
		0.99029	2.64664	2.2785	2.0047	2.30995	2.77194	55.4387		0.99029	4.25482	5.70866	5.41626	5.12658	102.532
		1.05631	2.43435	2.89637	2.66695	2.66589	3.19907	63.9814		1.05631	3.8043	5.47396	5.21075	4.82967	96.5934
		1.12232	1.58736	2.59821	2.52937	2.23831	2.68598	53.7195		1.12232	3.19406	4.03992	5.1192	4.11773	82.3545
		1.18834	1.36367	2.10723	1.95059	1.80716	2.1686	43.3719		1.18834	3.23382	3.29623	4.26759	3.59921	71.9843
		1.25436	1.39879	2.1937	1.73967	1.77739	2.13286	42.6573		1.25436	3.07918	2.77387	3.77888	3.21064	64.2129
		1.32038	1.42962	1.88459	1.669	1.66107	1.99328	39.8657		1.32038	2.59949	2.70739	3.8615	3.05613	61.1225
		1.3864	1.59582	1.87064	1.52477	1.66374	1.99649	39.9298		1.3864	2.64535	2.75063	4.01701	3.13766	62.7533
		1.45242	1.41895	1.66665	1.55379	1.54646	1.85576	37.1151		1.45242	2.78065	2.8062	4.27836	3.2884	65.7681
		1.51844	1.61405	1.70169	1.91813	1.74462	2.09355	41.871		1.51844	3.4484	3.07254	4.39105	3.63733	72.7466
		1.58446	2.07735	2.01639	2.36018	2.15131	2.58157	51.6314		1.58446	3.55075	3.89265	4.56837	4.00392	80.0785
		1.65048	2.26387	2.23779	2.84837	2.45001	2.94001	58.8002		1.65048	4.34625	4.34267	5.86121	4.85004	97.0009
		1.7165	2.14623	2.82884	3.10975	2.69494	3.23393	64.6786		1.7165	4.23433	5.01835	6.53498	5.26255	105.251
		1.78252	2.32163	3.25715	3.26894	2.94924	3.53909	70.7818		1.78252	4.00032	5.67712	6.61466	5.4307	108.614
		1.84853	2.52928	2.82487	2.66205	2.67207	3.20648	64.1296		1.84853	3.80402	5.2845	4.81997	4.63616	92.7233
		1.91455	1.45847	2.36665	2.27105	2.03206	2.43847	48.7694		1.91455	3.14077	4.03489	4.03205	3.7359	74.7181
		1.98057	0.81781	1.56752	1.19965	1.19499	1.43399	28.6798		1.98057	2.66317	2.75407	3.44102	2.95275	59.0551
		2.04659	0.61766	0.79977	0.59318	0.670203	0.804244	16.0849		2.04659	1.75151	1.6779	2.11999	1.8498	36.996
		2.11261	0.55445	0.74995	0.21747	0.50729	0.608748	12.175		2.11261	1.53878	1.35396	2.04474	1.64583	32.9165
		2.17863	0.45641	0.48922	0.20511	0.38358	0.460296	9.20592		2.17863	1.21251	0.95785	1.60421	1.25819	25.1638
		2.24465	0.33778	0.48616	0.20263	0.34219	0.410628	8.21256		2.24465	1.38243	0.79522	1.20577	1.12781	22.5561
		2.31067	0.49113	0.61234	0.3272	0.47689	0.572268	11.4454		2.31067	1.35862	0.79588	1.03691	1.0638	21.2761
		2.37669	0.30664	0.41925	0.27661	0.334167	0.401	8.02		2.37669	1.22906	0.55433	0.67199	0.81846	16.3692
		2.44271	0.40715	0.59997	0.36992	0.459013	0.550816	11.0163		2.44271	0.82124	0.43031	0.628	0.626517	12.5303
		2.50873	0.41624	0.82092	0.40759	0.54825	0.6579	13.158		2.50873	0.57712	0.42819	0.73028	0.57853	11.5706
		2.57474	0.27553	0.67625	0.34174	0.431173	0.517408	10.3482		2.57474	0.17359	0.4863	0.51866	0.39285	7.857
		2.64076	0.3837	0.7696	0.40448	0.51926	0.623112	12.4622		2.64076	0.24182	0.40326	0.59795	0.414343	8.28687
		2.70678	0.48077	0.73501	0.35332	0.523033	0.62764	12.5528		2.70678	0.30197	0.24479	0.75975	0.435503	8.71007
		2.7728	0.35481	0.5143	0.26582	0.37831	0.453972	9.07944		2.7728	0.25865	0.35845	0.50849	0.375197	7.50393
		image013
		red channel (par-3-mCh)	measurements					multiply to fit to y-axis		yellow channel (par-6-zf1-yfp)	measurements				multiply to fit to y-axis
		distance (microns)	m1	m2	m3	avg	normalized to yfp	*20		distance (microns)	m1	m2	m3	avg	*20
		0	0.16797	0.05545	0.07082	0.09808	0.117696	2.35392		0	0	0.30567	0.06112	0.122263	2.44527
		0.06602	0.14468	0.04416	0.06761	0.0854833	0.10258	2.0516		0.06602	0.05237	0.38084	0.13651	0.189907	3.79813
		0.13204	0.16409	0.06175	0.02204	0.0826267	0.099152	1.98304		0.13204	0.04398	0.51985	0.24529	0.269707	5.39413
		0.19806	0.2035	0.14611	0.07124	0.140283	0.16834	3.3668		0.19806	0.09916	0.64736	0.23695	0.327823	6.55647
		0.26408	0.12864	0.11723	0.09637	0.11408	0.136896	2.73792		0.26408	0.21538	1.0043	0.46436	0.561347	11.2269
		0.3301	0.15755	0.15976	0.06073	0.126013	0.151216	3.02432		0.3301	0.26478	1.03029	0.50774	0.600937	12.0187
		0.39611	0.25254	0.16307	0.07024	0.16195	0.19434	3.8868		0.39611	0.68723	1.02292	0.62127	0.77714	15.5428
		0.46213	0.15219	0.17137	0.09608	0.13988	0.167856	3.35712		0.46213	0.89375	1.36165	0.80887	1.02142	20.4285
		0.52815	0.13478	0.15165	0.06918	0.118537	0.142244	2.84488		0.52815	0.97225	1.55822	1.17368	1.23472	24.6943
		0.59417	0.11137	0.24586	0.13964	0.165623	0.198748	3.97496		0.59417	1.0328	2.11287	1.44423	1.52997	30.5993
		0.66019	0.15051	0.44602	0.24148	0.279337	0.335204	6.70408		0.66019	1.26095	2.71385	1.64634	1.87371	37.4743
		0.72621	0.15472	0.79426	0.11692	0.3553	0.42636	8.5272		0.72621	1.75911	3.88858	1.98086	2.54285	50.857
		0.79223	0.34621	1.24224	0.40099	0.663147	0.795776	15.9155		0.79223	2.27823	4.44559	2.43529	3.05304	61.0607
		0.85825	0.6472	1.56667	0.75535	0.98974	1.18769	23.7538		0.85825	3.08454	4.48836	3.71016	3.76102	75.2204
		0.92427	1.44619	2.03449	1.13587	1.53885	1.84662	36.9324		0.92427	3.88053	4.0163	4.40435	4.10039	82.0079
		0.99029	2.04398	1.92614	1.70412	1.89141	2.2697	45.3939		0.99029	4.29934	3.43237	5.03544	4.25572	85.1143
		1.05631	2.3913	1.56356	2.64598	2.20028	2.64034	52.8067		1.05631	4.16742	2.88332	4.74033	3.93036	78.6071
		1.12232	2.42157	1.41489	2.7475	2.19465	2.63358	52.6717		1.12232	3.57831	2.54797	3.97395	3.36674	67.3349
		1.18834	2.31726	1.25519	2.05951	1.87732	2.25278	45.0557		1.18834	2.61238	2.09144	2.91402	2.53928	50.7856
		1.25436	1.77301	1.03382	1.80625	1.53769	1.84523	36.9046		1.25436	2.11654	1.78413	2.5765	2.15906	43.1811
		1.32038	1.36814	0.84815	1.37091	1.19573	1.43488	28.6976		1.32038	1.99292	1.69542	2.38984	2.02606	40.5212
		1.3864	1.15253	0.88265	1.34206	1.12575	1.3509	27.0179		1.3864	1.81481	1.69803	2.25914	1.92399	38.4799
		1.45242	0.93941	1.0922	1.3887	1.1401	1.36812	27.3625		1.45242	2.09474	1.69655	2.15844	1.98324	39.6649
		1.51844	1.02977	0.94813	1.43018	1.13603	1.36323	27.2646		1.51844	2.39224	1.92663	2.13485	2.15124	43.0248
		1.58446	1.36263	1.16179	1.4126	1.31234	1.57481	31.4962		1.58446	3.07089	2.39347	2.31444	2.59293	51.8587
		1.65048	1.57731	1.35324	1.87508	1.60188	1.92225	38.445		1.65048	3.6019	3.02828	2.93169	3.18729	63.7458
		1.7165	1.8568	1.72614	2.3631	1.98201	2.37842	47.5683		1.7165	4.08185	3.81399	3.34546	3.7471	74.942
		1.78252	2.10618	2.01752	2.37267	2.16546	2.59855	51.971		1.78252	4.19518	3.69709	3.65066	3.84764	76.9529
		1.84853	1.60768	2.10194	2.54855	2.08606	2.50327	50.0654		1.84853	3.79748	3.93216	3.71714	3.81559	76.3119
		1.91455	1.17275	1.81715	2.38471	1.79154	2.14984	42.9969		1.91455	3.01148	3.56988	3.17754	3.25297	65.0593
		1.98057	0.56917	1.22637	1.78501	1.19352	1.43222	28.6444		1.98057	2.28628	3.0283	2.66827	2.66095	53.219
		2.04659	0.3488	0.69164	1.37811	0.806183	0.96742	19.3484		2.04659	1.83451	2.35953	2.03913	2.07772	41.5545
		2.11261	0.17382	0.49583	0.76732	0.47899	0.574788	11.4958		2.11261	1.46101	2.05659	2.16152	1.89304	37.8608
		2.17863	0.11528	0.19859	0.50644	0.273437	0.328124	6.56248		2.17863	1.37397	1.82435	1.66629	1.62154	32.4307
		2.24465	0.05894	0.10684	0.26328	0.14302	0.171624	3.43248		2.24465	0.89399	1.38887	1.41623	1.23303	24.6606
		2.31067	0.04801	0.23597	0.17739	0.15379	0.184548	3.69096		2.31067	0.83906	1.15088	0.85249	0.947477	18.9495
		2.37669	0.09477	0.33636	0.18135	0.20416	0.244992	4.89984		2.37669	0.79818	1.00243	0.713	0.83787	16.7574
		2.44271	0.06955	0.1495	0.11208	0.110377	0.132452	2.64904		2.44271	0.49667	0.99184	0.36856	0.619023	12.3805
		2.50873	0.05202	0.18594	0.12134	0.119767	0.14372	2.8744		2.50873	0.27797	0.792	0.35761	0.47586	9.5172
		2.57474	0.04629	0.19675	0.05146	0.0981667	0.1178	2.356		2.57474	0.23013	0.67026	0.30824	0.402877	8.05753
		2.64076	0.02683	0.17608	0.00289	0.0686	0.08232	1.6464		2.64076	0.10463	0.66407	0.26476	0.344487	6.88973
		2.70678	0.02016	0.11639	0.05692	0.06449	0.077388	1.54776		2.70678	0.13118	0.87835	0.25289	0.420807	8.41613
		2.7728	0.01011	0.09485	0.094	0.06632	0.079584	1.59168		2.7728	0.03042	0.72349	0.23954	0.33115	6.623
		image014
		red channel (par-3-mCh)	measurements					multiply to fit to y-axis		yellow channel (par-6-zf1-yfp)	measurements				multiply to fit to y-axis
		distance (microns)	m1	m2	m3	avg	normalized to yfp	*20		distance (microns)	m1	m2	m3	avg	*20
		0	0.44027	0.57203	0.04803	0.353443	0.424132	8.48264		0	0.40493	0.59722	0.73446	0.57887	11.5774
		0.06602	0.32206	0.56095	0.0973	0.32677	0.392124	7.84248		0.06602	0.53961	0.7566	0.71278	0.669663	13.3933
		0.13204	0.30873	0.56747	0.08285	0.319683	0.38362	7.6724		0.13204	0.6512	0.71259	0.78198	0.715257	14.3051
		0.19806	0.40863	0.52524	0.10264	0.345503	0.414604	8.29208		0.19806	0.92898	0.82174	0.97224	0.907653	18.1531
		0.26408	0.43704	0.52858	0.11893	0.361517	0.43382	8.6764		0.26408	0.78011	0.94468	0.89612	0.873637	17.4727
		0.3301	0.50452	0.41285	0.12513	0.3475	0.417	8.34		0.3301	1.00408	0.94032	0.9932	0.9792	19.584
		0.39611	0.63168	0.34362	0.09555	0.35695	0.42834	8.5668		0.39611	0.91607	1.14126	1.21956	1.0923	21.8459
		0.46213	0.74617	0.59275	0.13072	0.48988	0.587856	11.7571		0.46213	1.04075	1.14192	1.14085	1.10784	22.1568
		0.52815	0.69962	0.47313	0.17062	0.44779	0.537348	10.747		0.52815	1.2797	1.29206	1.04401	1.20526	24.1051
		0.59417	0.79031	0.54525	0.21059	0.515383	0.61846	12.3692		0.59417	1.22435	1.56246	1.23001	1.33894	26.7788
		0.66019	1.12484	0.47385	0.22277	0.607153	0.728584	14.5717		0.66019	1.40861	1.45294	1.51448	1.45868	29.1735
		0.72621	1.39203	0.5618	0.33132	0.761717	0.91406	18.2812		0.72621	1.64817	1.41242	1.67151	1.57737	31.5473
		0.79223	1.93854	0.81855	0.66053	1.13921	1.36705	27.341		0.79223	1.9221	1.23617	1.98583	1.7147	34.294
		0.85825	2.68943	1.5581	1.40325	1.88359	2.26031	45.2062		0.85825	2.20107	1.69614	2.43278	2.11	42.1999
		0.92427	3.17075	2.07448	1.89362	2.37962	2.85554	57.1108		0.92427	2.37947	1.87896	2.62854	2.29566	45.9131
		0.99029	3.0497	2.94172	2.30086	2.76409	3.31691	66.3382		0.99029	1.85096	2.17824	2.38557	2.13826	42.7651
		1.05631	2.71564	3.70646	2.50927	2.97712	3.57255	71.451		1.05631	1.37342	2.11168	1.91336	1.79949	35.9897
		1.12232	2.20912	3.39908	2.05457	2.55426	3.06511	61.3022		1.12232	1.0341	1.59441	1.44097	1.35649	27.1299
		1.18834	1.85755	2.58893	1.83421	2.09356	2.51228	50.2455		1.18834	0.74873	0.84765	1.19618	0.930853	18.6171
		1.25436	1.49614	2.1187	1.72021	1.77835	2.13402	42.6804		1.25436	0.8212	0.85423	1.08279	0.919407	18.3881
		1.32038	1.23929	1.94224	1.43402	1.53852	1.84622	36.9244		1.32038	0.56241	0.70082	1.07504	0.779423	15.5885
		1.3864	1.10921	1.78862	1.3528	1.41688	1.70025	34.005		1.3864	0.67318	0.73552	1.09052	0.833073	16.6615
		1.45242	1.07518	1.88677	1.24299	1.40165	1.68198	33.6395		1.45242	0.67042	0.71585	1.08747	0.82458	16.4916
		1.51844	1.28537	2.02875	1.65347	1.65586	1.98704	39.7407		1.51844	1.0619	0.8004	0.9861	0.949467	18.9893
		1.58446	1.45804	2.24787	1.63025	1.77872	2.13446	42.6893		1.58446	1.15434	0.91859	1.31404	1.12899	22.5798
		1.65048	1.76966	2.68625	1.68493	2.04695	2.45634	49.1267		1.65048	1.34059	1.40041	1.63902	1.46001	29.2001
		1.7165	2.19445	3.12078	1.92389	2.41304	2.89565	57.913		1.7165	2.00923	1.81705	2.06916	1.96515	39.3029
		1.78252	2.90662	3.21854	2.35031	2.82516	3.39019	67.8038		1.78252	2.66442	2.32275	2.21742	2.40153	48.0306
		1.84853	3.27999	2.93784	2.49006	2.90263	3.48316	69.6631		1.84853	2.85674	2.66963	2.31938	2.61525	52.305
		1.91455	2.62161	2.61599	1.88325	2.37362	2.84834	56.9668		1.91455	2.51785	2.35196	2.00987	2.29323	45.8645
		1.98057	1.88015	2.28567	1.11995	1.76192	2.11431	42.2862		1.98057	1.97552	1.81081	1.52309	1.76981	35.3961
		2.04659	1.0271	1.31861	0.58638	0.977363	1.17284	23.4567		2.04659	1.61065	1.36247	1.34291	1.43868	28.7735
		2.11261	0.53479	0.78688	0.35533	0.559	0.6708	13.416		2.11261	1.22134	1.33496	1.33932	1.29854	25.9708
		2.17863	0.4284	0.45876	0.16989	0.35235	0.42282	8.4564		2.17863	1.07126	1.25292	1.11464	1.14627	22.9255
		2.24465	0.38681	0.36558	0.05686	0.26975	0.3237	6.474		2.24465	1.02215	1.13925	0.75852	0.973307	19.4661
		2.31067	0.36589	0.47022	0.16673	0.33428	0.401136	8.02272		2.31067	1.03311	1.09528	0.89852	1.00897	20.1794
		2.37669	0.15631	0.32898	0.11131	0.198867	0.23864	4.7728		2.37669	1.00865	1.15838	0.88852	1.01852	20.3703
		2.44271	0.3013	0.29243	0.05935	0.217693	0.261232	5.22464		2.44271	0.97347	1.06365	0.605	0.880707	17.6141
		2.50873	0.25748	0.29575	0.09307	0.215433	0.25852	5.1704		2.50873	1.03304	1.05833	0.65697	0.916113	18.3223
		2.57474	0.2472	0.30375	0.10514	0.218697	0.262436	5.24872		2.57474	0.91169	0.97127	0.73589	0.87295	17.459
		2.64076	0.26217	0.26682	0.16259	0.230527	0.276632	5.53264		2.64076	0.96323	0.80244	0.73546	0.83371	16.6742
		2.70678	0.32695	0.29957	0.17157	0.26603	0.319236	6.38472		2.70678	0.53857	0.59137	0.72997	0.61997	12.3994
		2.7728	0.37305	0.30651	0.33093	0.33683	0.404196	8.08392		2.7728	0.46706	0.26156	0.74778	0.492133	9.84267
		image018
		red channel (par-3-mCh)	measurements					multiply to fit to y-axis		yellow channel (par-6-zf1-yfp)	measurements				multiply to fit to y-axis
		distance (microns)	m1	m2	m3	avg	normalized to yfp	*20		distance (microns)	m1	m2	m3	avg	*20
		0	0.84713	0.72571	0.53655	0.70313	0.843756	16.8751		0	0.49539	0.6922	0.64696	0.611517	12.2303
		0.06602	0.74948	0.57473	0.48803	0.60408	0.724896	14.4979		0.06602	0.53392	0.87915	0.67936	0.697477	13.9495
		0.13204	0.59603	0.58556	0.6972	0.626263	0.751516	15.0303		0.13204	0.60483	1.1339	0.55309	0.76394	15.2788
		0.19806	0.47624	0.68145	0.58561	0.5811	0.69732	13.9464		0.19806	0.79549	1.13387	0.72955	0.886303	17.7261
		0.26408	0.54351	0.7228	0.52779	0.598033	0.71764	14.3528		0.26408	0.76183	1.20126	0.82195	0.928347	18.5669
		0.3301	0.56786	0.58808	0.45216	0.536033	0.64324	12.8648		0.3301	0.6958	0.95717	0.67745	0.776807	15.5361
		0.39611	0.43155	0.59855	0.45892	0.49634	0.595608	11.9122		0.39611	0.66356	1.05287	0.92021	0.87888	17.5776
		0.46213	0.53046	0.61369	0.49745	0.5472	0.65664	13.1328		0.46213	0.63834	1.17666	1.04919	0.95473	19.0946
		0.52815	0.58542	0.71799	0.52014	0.60785	0.72942	14.5884		0.52815	0.76818	1.03613	1.03144	0.94525	18.905
		0.59417	0.61178	0.69775	0.49497	0.6015	0.7218	14.436		0.59417	0.81823	1.29331	1.24968	1.12041	22.4081
		0.66019	0.73386	0.84676	0.95816	0.84626	1.01551	20.3102		0.66019	0.98127	1.53836	1.61493	1.37819	27.5637
		0.72621	1.10032	1.0876	1.42434	1.20409	1.4449	28.8981		0.72621	1.34134	1.57602	1.86437	1.59391	31.8782
		0.79223	1.4055	1.59992	2.08059	1.69534	2.0344	40.6881		0.79223	1.70449	1.92849	1.99551	1.87616	37.5233
		0.85825	2.2666	2.18976	2.37372	2.27669	2.73203	54.6406		0.85825	1.85308	1.9088	2.03762	1.93317	38.6633
		0.92427	2.4369	2.40562	2.44482	2.42911	2.91494	58.2987		0.92427	1.97101	1.6397	1.69608	1.76893	35.3786
		0.99029	2.57383	2.6333	2.02654	2.41122	2.89347	57.8694		0.99029	1.64642	1.46188	1.37489	1.4944	29.8879
		1.05631	2.17367	2.46772	1.98861	2.21	2.652	53.04		1.05631	1.38472	1.19808	0.96504	1.18261	23.6523
		1.12232	1.66748	2.07672	1.65258	1.79893	2.15871	43.1742		1.12232	1.18121	0.91791	0.77864	0.959253	19.1851
		1.18834	1.3082	1.76863	1.14964	1.40882	1.69059	33.8118		1.18834	0.96044	0.86446	0.70591	0.843603	16.8721
		1.25436	1.4926	1.68683	1.18418	1.45454	1.74544	34.9089		1.25436	1.09868	0.94792	0.50369	0.850097	17.0019
		1.32038	1.48909	1.58474	1.13124	1.40169	1.68203	33.6406		1.32038	1.01631	0.73642	0.57078	0.774503	15.4901
		1.3864	1.68526	1.49465	0.90529	1.36173	1.63408	32.6816		1.3864	0.97912	0.64563	0.44716	0.690637	13.8127
		1.45242	1.43858	1.50174	1.15175	1.36402	1.63683	32.7366		1.45242	0.92893	0.68404	0.74599	0.78632	15.7264
		1.51844	1.56653	1.40383	1.11543	1.36193	1.63432	32.6863		1.51844	1.05462	0.73553	0.90547	0.89854	17.9708
		1.58446	1.87064	1.25928	1.17577	1.43523	1.72228	34.4455		1.58446	1.42106	0.89432	0.88486	1.06675	21.3349
		1.65048	2.46761	1.61829	1.35084	1.81225	2.1747	43.4939		1.65048	1.89598	1.05912	1.16417	1.37309	27.4618
		1.7165	2.6309	1.79474	1.55593	1.99386	2.39263	47.8526		1.7165	2.11293	1.28482	1.17912	1.52562	30.5125
		1.78252	2.90166	2.05417	1.74482	2.23355	2.68026	53.6052		1.78252	2.33168	1.66487	1.62462	1.87372	37.4745
		1.84853	2.70887	2.46754	2.2429	2.4731	2.96772	59.3545		1.84853	1.97742	1.75888	1.94426	1.89352	37.8704
		1.91455	1.82225	2.36831	2.43289	2.20782	2.64938	52.9876		1.91455	1.58771	1.82355	1.96356	1.79161	35.8321
		1.98057	1.14738	2.12682	2.16854	1.81425	2.1771	43.5419		1.98057	1.34209	1.63963	1.76619	1.58264	31.6527
		2.04659	0.90235	1.59109	1.43805	1.3105	1.5726	31.4519		2.04659	1.03286	1.15757	1.64161	1.27735	25.5469
		2.11261	0.68067	0.99799	0.89865	0.859103	1.03092	20.6185		2.11261	0.96799	1.1251	1.38113	1.15807	23.1615
		2.17863	0.39366	0.79911	0.57959	0.590787	0.708944	14.1789		2.17863	0.91393	1.06987	1.09133	1.02504	20.5009
		2.24465	0.35207	0.45668	0.61359	0.474113	0.568936	11.3787		2.24465	0.98368	0.92084	0.9667	0.957073	19.1415
		2.31067	0.24647	0.59736	0.62047	0.4881	0.58572	11.7144		2.31067	1.15614	0.77928	0.90682	0.947413	18.9483
		2.37669	0.28431	0.62986	0.6096	0.507923	0.609508	12.1902		2.37669	1.23101	0.93417	0.88639	1.01719	20.3438
		2.44271	0.38246	0.5772	0.48657	0.482077	0.578492	11.5698		2.44271	1.04486	0.79187	1.01598	0.950903	19.0181
		2.50873	0.56311	0.62983	0.72927	0.640737	0.768884	15.3777		2.50873	1.0505	0.78739	0.82558	0.887823	17.7565
		2.57474	0.5058	0.53678	0.84144	0.628007	0.753608	15.0722		2.57474	1.21021	0.76236	0.77497	0.915847	18.3169
		2.64076	0.54682	0.48764	0.66959	0.568017	0.68162	13.6324		2.64076	1.26561	0.82963	0.85389	0.983043	19.6609
		2.70678	0.65656	0.51649	0.58381	0.58562	0.702744	14.0549		2.70678	1.30962	0.60559	0.72313	0.879447	17.5889
		2.7728	0.8366	0.3427	0.56466	0.58132	0.697584	13.9517		2.7728	1.4275	0.49409	0.69601	0.872533	17.4507
		image010
		red channel (par-3-mCh)	measurements					multiply to fit to y-axis		yellow channel (par-6-zf1-yfp)	measurements				multiply to fit to y-axis
		distance (microns)	m1	m2	m3	avg	normalized to yfp	*20		distance (microns)	m1	m2	m3	avg	*20
		0	0.08851	0.11871	0.05631	0.0878433	0.105412	2.10824		0	0.04912	0.09266	0.5123	0.218027	4.36053
		0.06602	0.04479	0.22544	0.07396	0.11473	0.137676	2.75352		0.06602	0.12563	0.11407	0.49494	0.24488	4.8976
		0.13204	0.11728	0.24298	0.06486	0.141707	0.170048	3.40096		0.13204	0.33166	0.22159	0.59468	0.382643	7.65287
		0.19806	0.04488	0.19509	0.16563	0.1352	0.16224	3.2448		0.19806	0.59443	0.30514	0.80606	0.568543	11.3709
		0.26408	0.08989	0.23051	0.24165	0.18735	0.22482	4.4964		0.26408	0.72137	0.41638	0.86854	0.668763	13.3753
		0.3301	0.06198	0.36968	0.12806	0.186573	0.223888	4.47776		0.3301	0.73842	0.39272	0.89038	0.67384	13.4768
		0.39611	0.02146	0.46125	0.12975	0.204153	0.244984	4.89968		0.39611	0.6801	0.66225	0.85823	0.733527	14.6705
		0.46213	0.14961	0.53004	0.11948	0.266377	0.319652	6.39304		0.46213	0.93375	0.60668	0.88603	0.80882	16.1764
		0.52815	0.13927	0.44998	0.06003	0.216427	0.259712	5.19424		0.52815	0.89999	0.57254	0.75438	0.742303	14.8461
		0.59417	0.21471	0.58075	0.04485	0.280103	0.336124	6.72248		0.59417	1.05177	0.97473	0.64097	0.889157	17.7831
		0.66019	0.62018	0.4982	0.02932	0.382567	0.45908	9.1816		0.66019	1.26509	1.35585	0.71948	1.11347	22.2695
		0.72621	1.09201	0.77893	0.26404	0.71166	0.853992	17.0798		0.72621	1.43546	1.46655	0.99462	1.29888	25.9775
		0.79223	1.5296	1.39388	0.47934	1.13427	1.36113	27.2226		0.79223	1.73779	1.82901	1.14644	1.57108	31.4216
		0.85825	1.92166	2.17154	1.06527	1.71949	2.06339	41.2678		0.85825	1.5348	2.10176	1.42944	1.68867	33.7733
		0.92427	2.29935	2.59864	1.71207	2.20335	2.64402	52.8805		0.92427	1.36896	1.86589	1.77118	1.66868	33.3735
		0.99029	2.08682	2.77533	2.04866	2.3036	2.76432	55.2865		0.99029	1.1287	1.7795	1.56616	1.49145	29.8291
		1.05631	1.79365	2.64669	2.38287	2.2744	2.72928	54.5857		1.05631	0.87287	1.24575	1.42999	1.18287	23.6574
		1.12232	1.46917	1.92277	2.21694	1.86963	2.24355	44.871		1.12232	0.87014	1.00854	1.16278	1.01382	20.2764
		1.18834	1.191	1.55324	1.72076	1.48833	1.786	35.72		1.18834	0.58126	0.97284	1.14685	0.900317	18.0063
		1.25436	1.07405	1.12453	1.90251	1.36703	1.64044	32.8087		1.25436	0.62802	0.61691	1.01513	0.753353	15.0671
		1.32038	1.14619	1.11841	1.55536	1.27332	1.52798	30.5597		1.32038	0.6532	0.74005	0.75734	0.716863	14.3373
		1.3864	1.26911	1.07323	1.28857	1.2103	1.45236	29.0473		1.3864	0.52658	0.86017	0.64127	0.676007	13.5201
		1.45242	1.0618	1.24131	1.07271	1.12527	1.35033	27.0066		1.45242	0.56741	0.87564	0.65564	0.699563	13.9913
		1.51844	1.11875	1.01979	0.8246	0.987713	1.18526	23.7051		1.51844	0.71864	0.80427	0.56704	0.69665	13.933
		1.58446	1.06556	1.11139	0.94498	1.04064	1.24877	24.9754		1.58446	0.9019	0.97504	0.76015	0.87903	17.5806
		1.65048	1.27276	1.09325	1.2156	1.19387	1.43264	28.6529		1.65048	1.0629	1.32536	1.0044	1.13089	22.6177
		1.7165	1.50497	1.47013	1.42212	1.46574	1.75889	35.1778		1.7165	1.33646	1.58304	1.27161	1.39704	27.9407
		1.78252	2.10513	1.74011	1.89061	1.91195	2.29434	45.8868		1.78252	1.65019	1.8874	1.42396	1.65385	33.077
		1.84853	2.39086	1.90807	1.83794	2.04562	2.45475	49.095		1.84853	1.70245	2.0074	1.68682	1.79889	35.9778
		1.91455	2.01252	1.65073	1.67007	1.77777	2.13333	42.6666		1.91455	1.50411	1.78453	1.35658	1.54841	30.9681
		1.98057	1.32021	1.31183	1.1602	1.26408	1.5169	30.3379		1.98057	1.1134	1.37646	1.03017	1.17334	23.4669
		2.04659	0.79678	0.57612	0.57458	0.64916	0.778992	15.5798		2.04659	0.94051	1.071	1.0515	1.021	20.4201
		2.11261	0.38126	0.37841	0.33497	0.36488	0.437856	8.75712		2.11261	0.62626	0.82208	0.76161	0.73665	14.733
		2.17863	0.23124	0.23034	0.19071	0.21743	0.260916	5.21832		2.17863	0.56542	0.89724	0.77392	0.745527	14.9105
		2.24465	0.25118	0.18391	0.12836	0.187817	0.22538	4.5076		2.24465	0.42998	0.94556	0.80909	0.72821	14.5642
		2.31067	0.06102	0.09935	0.06267	0.0743467	0.089216	1.78432		2.31067	0.43078	0.80566	0.69331	0.64325	12.865
		2.37669	0.07143	0.2843	0.05893	0.13822	0.165864	3.31728		2.37669	0.58503	0.69493	0.63011	0.63669	12.7338
		2.44271	0.05551	0.0665	0.09425	0.0720867	0.086504	1.73008		2.44271	0.52387	0.62659	0.58294	0.5778	11.556
		2.50873	0.02701	0.12571	0.07977	0.0774967	0.092996	1.85992		2.50873	0.57363	0.64322	0.42753	0.548127	10.9625
		2.57474	0.0323	0.10573	0.10363	0.0805533	0.096664	1.93328		2.57474	0.51923	0.48877	0.31803	0.44201	8.8402
		2.64076	0.03217	0.10478	0.14145	0.0928	0.11136	2.2272		2.64076	0.29118	0.43352	0.40508	0.376593	7.53187
		2.70678	0.13323	0.09899	0.23968	0.1573	0.18876	3.7752		2.70678	0.30819	0.30294	0.38249	0.331207	6.62413
		2.7728	0.07054	0.15915	0.22058	0.15009	0.180108	3.60216		2.7728	0.25228	0.37223	0.16859	0.264367	5.28733

## Sheet: Figure 6I - source data
		Figure 6I - source data. Fluorescent intensity values for line trace measurements of PAR-6::ZF1::YFP; PAR-3::mCherry (heat shock ZIF-1)
		par-6(xn60); par-3(it301); xnEx494[hsp-16.41p::zif-1; t28h11.8p::CFP, pRF4] replicate3 070320
		image001
		red channel (par-3-mCh)	measurements					multiply to fit to y-axis		yellow channel (par-6-zf1-yfp)	measurements				multiply to fit to y-axis
		distance (microns)	m1	m2	m3	avg	normalized to yfp	*20		distance (microns)	m1	m2	m3	avg	*20
		0	0.33732	0.44242	0.2791	0.36076	0.432912	8.65824		0	0	0	0.01746	0.00873	0.1746
		0.06602	0.35242	0.39389	0.1558	0.274845	0.329814	6.59628		0.06602	0	0	0.03335	0.016675	0.3335
		0.13204	0.31566	0.3545	0.27416	0.31433	0.377196	7.54392		0.13204	0	0	0.03125	0.015625	0.3125
		0.19806	0.34387	0.41534	0.38921	0.402275	0.48273	9.6546		0.19806	0	0	0.0365	0.01825	0.365
		0.26408	0.39316	0.35064	0.42696	0.3888	0.46656	9.3312		0.26408	0.0006735	0	0.049901	0.0249505	0.49901
		0.3301	0.43835	0.36039	0.36306	0.361725	0.43407	8.6814		0.3301	0.0323731	0	0.080397	0.0401985	0.80397
		0.39611	0.48706	0.39217	0.5053	0.448735	0.538482	10.7696		0.39611	0.0010105	0	0.048592	0.024296	0.48592
		0.46213	0.31644	0.33156	0.43807	0.384815	0.461778	9.23556		0.46213	0	0	0	0	0
		0.52815	0.23269	0.31688	0.57178	0.44433	0.533196	10.6639		0.52815	0	0	0	0	0
		0.59417	0.30932	0.57549	0.7189	0.647195	0.776634	15.5327		0.59417	0.0120251	0	0	0	0
		0.66019	0.62018	0.73101	1.26333	0.99717	1.1966	23.9321		0.66019	0.0288272	0.028165	0.028544	0.0283545	0.56709
		0.72621	0.85369	1.12351	2.03187	1.57769	1.89323	37.8646		0.72621	0.0265577	0.035124	0.037093	0.0361085	0.72217
		0.79223	1.24771	1.7984	2.42714	2.11277	2.53532	50.7065		0.79223	0.0087124	0.035125	0	0.0175625	0.35125
		0.85825	1.78597	2.54246	2.94713	2.74479	3.29375	65.8751		0.85825	0.0249887	0.039978	0	0.019989	0.39978
		0.92427	2.62491	2.75453	3.23282	2.99367	3.59241	71.8482		0.92427	0	0.08032	0	0.04016	0.8032
		0.99029	3.3125	2.7274	2.91169	2.81954	3.38345	67.6691		0.99029	0.0094075	0.009765	0.031387	0.020576	0.41152
		1.05631	3.09887	2.44704	2.37215	2.40959	2.89151	57.8303		1.05631	0.0243032	0	0.001665	0.0008325	0.01665
		1.12232	2.68995	2.49132	1.90537	2.19834	2.63801	52.7603		1.12232	0	0	0	0	0
		1.18834	2.50166	2.0246	1.45655	1.74057	2.08869	41.7738		1.18834	0	0	0.018629	0.0093145	0.18629
		1.25436	2.17447	1.7259	1.41546	1.57068	1.88482	37.6963		1.25436	0.0112395	0.001985	0.014422	0.0082035	0.16407
		1.32038	1.7195	1.42667	1.58354	1.5051	1.80613	36.1225		1.32038	0.0559829	0.030412	0.023421	0.0269165	0.53833
		1.3864	1.664	1.26016	1.5308	1.39548	1.67458	33.4915		1.3864	0.0003401	8e-05	0.032299	0.0161895	0.32379
		1.45242	1.82087	1.4711	1.47667	1.47389	1.76866	35.3732		1.45242	0	0	0.010378	0.005189	0.10378
		1.51844	1.65609	1.47455	1.69073	1.58264	1.89917	37.9834		1.51844	0	0	0.022219	0.0111095	0.22219
		1.58446	1.7892	1.48848	1.73442	1.61145	1.93374	38.6748		1.58446	0	0	0.010838	0.005419	0.10838
		1.65048	2.14978	1.98022	1.90363	1.94192	2.33031	46.6062		1.65048	0.0279599	0.005077	0.011523	0.0083	0.166
		1.7165	2.44753	2.1772	2.48687	2.33204	2.79844	55.9688		1.7165	0.0339304	0.029869	0.021533	0.025701	0.51402
		1.78252	2.73507	2.23844	2.89795	2.5682	3.08183	61.6367		1.78252	0.0339304	0.03072	0.010015	0.0203675	0.40735
		1.84853	2.25122	2.6578	3.17026	2.91403	3.49684	69.9367		1.84853	0.0052842	0.000455	0.107777	0.054116	1.08232
		1.91455	1.84634	2.45631	3.11742	2.78687	3.34424	66.8848		1.91455	0	0	0.172079	0.0860395	1.72079
		1.98057	1.33823	2.07614	2.67248	2.37431	2.84917	56.9834		1.98057	0	0	0.073019	0.0365095	0.73019
		2.04659	0.99249	1.49373	2.02724	1.76049	2.11258	42.2516		2.04659	0	0	0.082182	0.041091	0.82182
		2.11261	0.77429	1.05171	1.26291	1.15731	1.38877	27.7754		2.11261	0	0	0.017639	0.0088195	0.17639
		2.17863	0.57744	0.74155	0.90945	0.8255	0.9906	19.812		2.17863	0	0	0	0	0
		2.24465	0.55496	0.43122	0.35249	0.391855	0.470226	9.40452		2.24465	0	0	0.018401	0.0092005	0.18401
		2.31067	0.44543	0.34856	0.30757	0.328065	0.393678	7.87356		2.31067	0	0	0.014651	0.0073255	0.14651
		2.37669	0.347	0.45559	0.19756	0.326575	0.39189	7.8378		2.37669	0	0.024561	0	0.0122805	0.24561
		2.44271	0.38893	0.44202	0.27092	0.35647	0.427764	8.55528		2.44271	0	0.023876	0	0.011938	0.23876
		2.50873	0.4944	0.29116	0.1836	0.23738	0.284856	5.69712		2.50873	0	0.091739	0.02354	0.0576395	1.15279
		2.57474	0.58534	0.28663	0.18934	0.237985	0.285582	5.71164		2.57474	0	0.22193	0.03335	0.12764	2.5528
		2.64076	0.41735	0.34651	0.27735	0.31193	0.374316	7.48632		2.64076	0.0024161	0.165021	0.009222	0.0871215	1.74243
		2.70678	0.6534	0.23746	0.26024	0.24885	0.29862	5.9724		2.70678	0.0313437	0.074752	0	0.037376	0.74752
		2.7728	0.39441	0.20384	0.19782	0.20083	0.240996	4.81992		2.7728	0	0.003027	0	0.0015135	0.03027
		image003
		red channel (par-3-mCh)	measurements					multiply to fit to y-axis		yellow channel (par-6-zf1-yfp)	measurements				multiply to fit to y-axis
		distance (microns)	m1	m2	m3	avg	normalized to yfp	*20		distance (microns)	m1	m2	m3	avg	*20
		0	0.6515	1.04958	0.68282	0.794633	0.95356	19.0712		0	0	0	0	0	0
		0.06602	0.65656	1.10094	0.70448	0.82066	0.984792	19.6958		0.06602	0	0	0	0	0
		0.13204	0.57409	1.19206	0.63801	0.801387	0.961664	19.2333		0.13204	0	0	0	0	0
		0.19806	0.69268	1.23216	0.88912	0.937987	1.12558	22.5117		0.19806	0	0	0	0	0
		0.26408	0.81168	1.10892	0.87594	0.93218	1.11862	22.3723		0.26408	0	0	0	0	0
		0.3301	0.81419	1.08655	0.84417	0.91497	1.09796	21.9593		0.3301	0	0	0	0	0
		0.39611	0.7974	1.21851	0.87398	0.963297	1.15596	23.1191		0.39611	0	0	0	0	0
		0.46213	0.7612	1.19247	1.1732	1.04229	1.25075	25.015		0.46213	0	0	0	0	0
		0.52815	0.84042	1.20752	1.03076	1.02623	1.23148	24.6296		0.52815	0	0	0	0	0
		0.59417	0.95855	1.42067	1.20879	1.196	1.4352	28.7041		0.59417	0	0	0	0	0
		0.66019	1.25681	1.81909	1.58271	1.55287	1.86344	37.2689		0.66019	0	0	0	0	0
		0.72621	1.68029	2.23598	2.32752	2.08126	2.49752	49.9503		0.72621	0	0	0	0	0
		0.79223	2.35488	2.57022	2.95216	2.62575	3.1509	63.0181		0.79223	0.01139	0	0	0.00379667	0.0759333
		0.85825	3.39303	3.25745	3.45322	3.3679	4.04148	80.8296		0.85825	0.044181	0	0	0.014727	0.29454
		0.92427	4.31193	3.6919	3.73234	3.91206	4.69447	93.8894		0.92427	0.040056	0.0302192	0	0.0234251	0.468501
		0.99029	4.67374	3.66247	3.79346	4.04322	4.85187	97.0374		0.99029	0.021881	0.0664043	0.0045797	0.030955	0.6191
		1.05631	4.22696	3.48015	3.5581	3.75507	4.50608	90.1217		1.05631	0.016031	0.0556546	0.0376722	0.0364526	0.729052
		1.12232	3.92443	3.19793	3.34864	3.49033	4.1884	83.768		1.12232	0	0.0692926	0.0045382	0.0246103	0.492205
		1.18834	3.55888	2.78604	2.92408	3.08967	3.7076	74.152		1.18834	0	0.0784198	0.0049703	0.0277967	0.555934
		1.25436	3.34756	2.4399	2.94236	2.90994	3.49193	69.8386		1.25436	0	0	0.0286922	0.00956407	0.191281
		1.32038	3.25021	2.35979	2.78103	2.79701	3.35641	67.1282		1.32038	0	0	0.0373084	0.0124361	0.248723
		1.3864	2.92714	2.3948	2.85746	2.72647	3.27176	65.4352		1.3864	0	0	0.0520601	0.0173534	0.347067
		1.45242	2.7787	2.54083	2.96927	2.76293	3.31552	66.3104		1.45242	0	0	0.0787066	0.0262355	0.524711
		1.51844	3.21276	2.80251	3.51502	3.17676	3.81212	76.2423		1.51844	0.000845	0	0	0.000281667	0.00563333
		1.58446	3.45489	2.98663	4.06692	3.50281	4.20338	84.0675		1.58446	0.031467	0	0	0.010489	0.20978
		1.65048	3.68158	3.19427	4.32816	3.73467	4.4816	89.6321		1.65048	0.000922	0	0.0324759	0.0111326	0.222653
		1.7165	4.11291	3.58864	4.33255	4.01137	4.81364	96.2728		1.7165	0.007125	0.0162615	0.0930482	0.0388116	0.776231
		1.78252	4.3746	3.88819	3.96576	4.07618	4.89142	97.8284		1.78252	0.095648	0.0496072	0.104291	0.0831821	1.66364
		1.84853	4.09366	4.28063	3.07714	3.81714	4.58057	91.6114		1.84853	0.193744	0.0271335	0.0101922	0.0770232	1.54046
		1.91455	3.21665	4.02318	2.02672	3.08885	3.70662	74.1324		1.91455	0.139689	0	0.0061653	0.0486181	0.972362
		1.98057	2.25672	3.29947	1.42958	2.32859	2.79431	55.8862		1.98057	0.096821	0	0	0.0322737	0.645473
		2.04659	1.78856	3.01783	0.89505	1.90048	2.28058	45.6115		2.04659	0.000875	0	0	0.000291667	0.00583333
		2.11261	1.28315	2.69344	0.6314	1.536	1.8432	36.8639		2.11261	0	0	0	0	0
		2.17863	0.88576	2.24138	0.61788	1.24834	1.49801	29.9602		2.17863	0	0	0	0	0
		2.24465	0.92447	2.07897	0.5532	1.18555	1.42266	28.4531		2.24465	0	0	0	0	0
		2.31067	0.93784	2.04112	0.64911	1.20936	1.45123	29.0246		2.31067	0	0	0	0	0
		2.37669	1.07897	1.91278	0.62966	1.20714	1.44856	28.9713		2.37669	0	0	0	0	0
		2.44271	1.14188	1.8346	0.62708	1.20119	1.44142	28.8285		2.44271	0	0	0	0	0
		2.50873	1.13771	1.94656	0.62729	1.23719	1.48462	29.6925		2.50873	0	0	0	0	0
		2.57474	1.11927	2.13515	0.62194	1.29212	1.55054	31.0109		2.57474	0	0	0	0	0
		2.64076	1.19206	2.10121	0.72035	1.33787	1.60545	32.109		2.64076	0	0	0	0	0
		2.70678	1.35863	2.00676	0.74702	1.3708	1.64496	32.8993		2.70678	0	0	0	0	0
		2.7728	1.60024	1.83983	0.70146	1.38051	1.65661	33.1322		2.7728	0	0	0	0	0
		image016
		red channel (par-3-mCh)	measurements					multiply to fit to y-axis		yellow channel (par-6-zf1-yfp)	measurements				multiply to fit to y-axis
		distance (microns)	m1	m2	m3	avg	normalized to yfp	*20		distance (microns)	m1	m2	m3	avg	*20
		0	0.08695	0.14519	0.18577	0.16548	0.198576	3.97152		0	0	0	0	0	0
		0.06602	0.07199	0.13532	0.17917	0.157245	0.188694	3.77388		0.06602	0	0	0	0	0
		0.13204	0.08109	0.17461	0.15064	0.162625	0.19515	3.903		0.13204	0	0	0	0	0
		0.19806	0.09153	0.15629	0.11764	0.136965	0.164358	3.28716		0.19806	0	0	0	0	0
		0.26408	0.05739	0.24995	0.06886	0.159405	0.191286	3.82572		0.26408	0	0	0	0	0
		0.3301	0.03084	0.23234	0.20813	0.220235	0.264282	5.28564		0.3301	0	0	0	0	0
		0.39611	0.03942	0.17221	0.09789	0.13505	0.16206	3.2412		0.39611	0	0	0	0	0
		0.46213	0.03301	0.11377	0.09414	0.103955	0.124746	2.49492		0.46213	0	0	0	0	0
		0.52815	0.0399	0.1388	0.02379	0.081295	0.097554	1.95108		0.52815	0	0	0	0	0
		0.59417	0.08264	0.24318	0.07168	0.15743	0.188916	3.77832		0.59417	0	0	0	0	0
		0.66019	0.13232	0.32118	0.2375	0.27934	0.335208	6.70416		0.66019	0	0	0	0	0
		0.72621	0.27258	0.788	0.36529	0.576645	0.691974	13.8395		0.72621	0	0	0	0	0
		0.79223	0.74461	1.35069	0.82972	1.09021	1.30825	26.1649		0.79223	0.0095773	0.0018535	0.0024327	0.0021431	0.042862
		0.85825	1.38077	2.44181	1.37927	1.91054	2.29265	45.853		0.85825	0.0314473	0.0370364	0.0343853	0.0357109	0.714217
		0.92427	1.97605	2.9603	1.91466	2.43748	2.92498	58.4995		0.92427	0.0701222	0.0302164	0.0010211	0.0156188	0.312375
		0.99029	2.23435	3.18359	2.14304	2.66331	3.19598	63.9196		0.99029	0.0198893	0	0	0	0
		1.05631	2.33118	3.29288	2.10428	2.69858	3.2383	64.7659		1.05631	0	0	0	0	0
		1.12232	2.10263	2.93217	1.8652	2.39868	2.87842	57.5684		1.12232	0	0	0	0	0
		1.18834	1.63429	2.49847	1.62633	2.0624	2.47488	49.4976		1.18834	0	0	0	0	0
		1.25436	1.61901	2.03588	1.39098	1.71343	2.05612	41.1223		1.25436	0	0	0.0319123	0.0159561	0.319123
		1.32038	1.5852	1.63651	1.37999	1.50825	1.8099	36.198		1.32038	0	0	0.0044502	0.0022251	0.044502
		1.3864	1.29333	1.76927	1.4428	1.60603	1.92724	38.5448		1.3864	0	0	0	0	0
		1.45242	1.70526	1.91387	1.15137	1.53262	1.83914	36.7829		1.45242	0	0	0	0	0
		1.51844	1.94192	2.13013	1.36766	1.7489	2.09867	41.9735		1.51844	0	0	0.0052715	0.00263575	0.052715
		1.58446	1.99018	2.50226	1.71779	2.11003	2.53203	50.6406		1.58446	0	0	0.0294518	0.0147259	0.294518
		1.65048	2.42118	3.27485	2.23334	2.75409	3.30491	66.0983		1.65048	0	0	0	0	0
		1.7165	3.04472	2.84345	2.34011	2.59178	3.11014	62.2027		1.7165	0	0	0	0	0
		1.78252	3.00492	2.23653	2.35482	2.29568	2.75481	55.0962		1.78252	0	0.0082095	0	0.00410475	0.082095
		1.84853	2.38415	1.70669	1.62538	1.66603	1.99924	39.9848		1.84853	0.0281318	0.0245542	0	0.0122771	0.245542
		1.91455	1.79405	1.15646	1.09825	1.12736	1.35283	27.0565		1.91455	0.0037884	0	0	0	0
		1.98057	0.76228	0.65749	0.65874	0.658115	0.789738	15.7948		1.98057	0	0	0	0	0
		2.04659	0.46602	0.25159	0.24475	0.24817	0.297804	5.95608		2.04659	0	0	0	0	0
		2.11261	0.1835	0.18247	0.19014	0.186305	0.223566	4.47132		2.11261	0	0	0	0	0
		2.17863	0.21583	0.12757	0.13276	0.130165	0.156198	3.12396		2.17863	0	0	0	0	0
		2.24465	0.11965	0.07028	0.01904	0.04466	0.053592	1.07184		2.24465	0	0	0	0	0
		2.31067	0.14123	0.12636	0.05742	0.09189	0.110268	2.20536		2.31067	0	0	0	0	0
		2.37669	0.16098	0.0375	0.08417	0.060835	0.073002	1.46004		2.37669	0	0	0	0	0
		2.44271	0.21475	0.09536	0.07422	0.08479	0.101748	2.03496		2.44271	0	0	0	0	0
		2.50873	0.2331	0.15558	0.11918	0.13738	0.164856	3.29712		2.50873	0.0062747	0	0	0	0
		2.57474	0.26533	0.23599	0.2129	0.224445	0.269334	5.38668		2.57474	0.027661	0	0	0	0
		2.64076	0.18541	0.26516	0.18047	0.222815	0.267378	5.34756		2.64076	0.0004797	0	0	0	0
		2.70678	0.22744	0.1312	0.08764	0.10942	0.131304	2.62608		2.70678	0	0	0	0	0
		2.7728	0.2335	0.09593	0.15718	0.126555	0.151866	3.03732		2.7728	0	0	0	0	0
		image019
		red channel (par-3-mCh)	measurements					multiply to fit to y-axis		yellow channel (par-6-zf1-yfp)	measurements				multiply to fit to y-axis
		distance (microns)	m1	m2	m3	avg	normalized to yfp	*20		distance (microns)	m1	m2	m3	avg	*20
		0	0.32847	0.32415	0.17917	0.277263	0.332716	6.65432		0	0	0	0	0	0
		0.06602	0.27216	0.23355	0.11276	0.206157	0.247388	4.94776		0.06602	0	0	0	0	0
		0.13204	0.26601	0.25901	0.22322	0.249413	0.299296	5.98592		0.13204	0	0	0	0	0
		0.19806	0.22566	0.23773	0.27311	0.2455	0.2946	5.892		0.19806	0	0	0	0	0
		0.26408	0.07998	0.18847	0.15198	0.140143	0.168172	3.36344		0.26408	0	0	0	0	0
		0.3301	0.15496	0.14674	0.16167	0.154457	0.185348	3.70696		0.3301	0	0	0	0	0
		0.39611	0.24743	0.0827	0.06943	0.133187	0.159824	3.19648		0.39611	0	0	0	0	0
		0.46213	0.13027	0.16169	0.06821	0.120057	0.144068	2.88136		0.46213	0	0	0	0	0
		0.52815	0.16572	0.1661	0.18631	0.17271	0.207252	4.14504		0.52815	0	0	0	0	0
		0.59417	0.10159	0.26193	0.20424	0.189253	0.227104	4.54208		0.59417	0	0	0	0	0
		0.66019	0.18301	0.23226	0.19291	0.202727	0.243272	4.86544		0.66019	0	0	0	0	0
		0.72621	0.40779	0.53874	0.35932	0.435283	0.52234	10.4468		0.72621	0	0	0	0	0
		0.79223	0.79992	1.01701	0.46528	0.760737	0.912884	18.2577		0.79223	0	0	0	0	0
		0.85825	1.22976	1.57507	0.81532	1.20672	1.44806	28.9612		0.85825	0	0.003206	0	0.00106867	0.0213733
		0.92427	1.89982	1.71728	1.42107	1.67939	2.01527	40.3054		0.92427	0	0.0303898	0	0.0101299	0.202599
		0.99029	2.10066	1.83626	2.04499	1.99397	2.39276	47.8553		0.99029	0	0	0	0	0
		1.05631	1.87974	1.94616	1.85308	1.89299	2.27159	45.4318		1.05631	0	0	0	0	0
		1.12232	1.62926	1.75178	2.21277	1.8646	2.23752	44.7505		1.12232	0	0	0	0	0
		1.18834	1.39711	1.50445	1.82754	1.57637	1.89164	37.8328		1.18834	0	0	0	0	0
		1.25436	1.29633	1.13852	1.51633	1.31706	1.58047	31.6094		1.25436	0	0	0	0	0
		1.32038	1.32717	1.13762	1.28579	1.25019	1.50023	30.0046		1.32038	0	0	0	0	0
		1.3864	1.39735	1.16097	1.32798	1.29543	1.55452	31.0904		1.3864	0	0	0	0	0
		1.45242	1.41914	1.28613	1.47736	1.39421	1.67305	33.461		1.45242	0	0	0.0159527	0.00531757	0.106351
		1.51844	1.55041	1.46845	1.68785	1.5689	1.88268	37.6537		1.51844	0	0.0021584	0.0173094	0.00648927	0.129785
		1.58446	1.71838	1.82545	1.89505	1.81296	2.17555	43.511		1.58446	0	0.0074926	0	0.00249753	0.0499507
		1.65048	1.78709	2.10763	2.18182	2.02551	2.43062	48.6123		1.65048	0.003743	0	0.0074983	0.0037471	0.074942
		1.7165	2.22248	2.10175	2.59831	2.30751	2.76902	55.3803		1.7165	0.059848	0	0.0416737	0.0338406	0.676811
		1.78252	2.69806	2.32765	1.91132	2.31234	2.77481	55.4962		1.78252	0.150324	0	0.0643557	0.0715599	1.4312
		1.84853	2.49041	1.4921	1.36961	1.78404	2.14085	42.817		1.84853	0.113162	0	0.0518809	0.0550143	1.10029
		1.91455	1.87603	0.67074	1.11857	1.22178	1.46614	29.3227		1.91455	0.063767	0	0.0326436	0.0321369	0.642737
		1.98057	1.15531	0.60231	0.58485	0.780823	0.936988	18.7398		1.98057	0.036996	0	0.0012792	0.0127584	0.255168
		2.04659	0.70101	0.1497	0.43764	0.42945	0.51534	10.3068		2.04659	0.001414	0	0	0.000471333	0.00942667
		2.11261	0.37889	0.15982	0.29207	0.276927	0.332312	6.64624		2.11261	0	0	0	0	0
		2.17863	0.29326	0.11226	0.21236	0.20596	0.247152	4.94304		2.17863	0	0	0	0	0
		2.24465	0.213	0.05041	0.26712	0.176843	0.212212	4.24424		2.24465	0	0	0	0	0
		2.31067	0.05217	0.17758	0.41848	0.216077	0.259292	5.18584		2.31067	0	0	0	0	0
		2.37669	0.15533	0.05949	0.17165	0.128823	0.154588	3.09176		2.37669	0	0	0	0	0
		2.44271	0.25516	0.0741	0.30876	0.212673	0.255208	5.10416		2.44271	0	0	0	0	0
		2.50873	0.157	0.16536	0.29906	0.20714	0.248568	4.97136		2.50873	0	0	0	0	0
		2.57474	0.22138	0.28229	0.40304	0.302237	0.362684	7.25368		2.57474	0	0	0	0	0
		2.64076	0.21021	0.17396	0.36458	0.249583	0.2995	5.99		2.64076	0	0	0	0	0
		2.70678	0.16062	0.09112	0.25396	0.168567	0.20228	4.0456		2.70678	0	0	0	0	0
		2.7728	0.13328	0.04438	0.37328	0.183647	0.220376	4.40752		2.7728	0	0	0	0	0
		image010
		red channel (par-3-mCh)	measurements					multiply to fit to y-axis		yellow channel (par-6-zf1-yfp)	measurements				multiply to fit to y-axis
		distance (microns)	m1	m2	m3	avg	normalized to yfp	*20		distance (microns)	m1	m2	m3	avg	*20
		0	0.00093	0.0565	0.06642	0.0412833	0.04954	0.9908		0	0	0	0	0	0
		0.06602	0.00241	0.05531	0.07896	0.04556	0.054672	1.09344		0.06602	0	0	0	0	0
		0.13204	0.03244	0.03186	0.14783	0.07071	0.084852	1.69704		0.13204	0	0	0	0	0
		0.19806	0.0074	0.02637	0.04214	0.0253033	0.030364	0.60728		0.19806	0	0	0	0	0
		0.26408	0.04052	0.03487	0.02733	0.03424	0.041088	0.82176		0.26408	0	0	0	0	0
		0.3301	0	0.0363	0.0274	0.0212333	0.02548	0.5096		0.3301	0	0	0	0	0
		0.39611	0.00253	0.02051	0.05886	0.0273	0.03276	0.6552		0.39611	0	0	0	0	0
		0.46213	0.05503	0.12083	0.04479	0.07355	0.08826	1.7652		0.46213	0	0	0	0	0
		0.52815	0.15739	0.06667	0.07972	0.10126	0.121512	2.43024		0.52815	0	0	0	0	0
		0.59417	0.07708	0.08683	0.02908	0.06433	0.077196	1.54392		0.59417	0	0	0	0	0
		0.66019	0.17063	0.12409	0.06544	0.120053	0.144064	2.88128		0.66019	0	0	0	0	0
		0.72621	0.32756	0.11012	0.1997	0.21246	0.254952	5.09904		0.72621	0	0	0	0	0
		0.79223	0.41129	0.16829	0.45247	0.344017	0.41282	8.2564		0.79223	0	0	0	0	0
		0.85825	0.98837	0.4551	1.16112	0.868197	1.04184	20.8367		0.85825	0	0.007932	0	0.002644	0.05288
		0.92427	1.50057	0.97347	1.73868	1.40424	1.68509	33.7018		0.92427	0	0.057061	0	0.0190203	0.380407
		0.99029	1.92018	1.72952	2.12695	1.92555	2.31066	46.2132		0.99029	0.0368435	0.014929	0	0.0172575	0.34515
		1.05631	2.35809	1.91351	2.41005	2.22722	2.67266	53.4532		1.05631	0.0622299	0.022537	0	0.0282556	0.565113
		1.12232	1.83952	1.88293	2.43155	2.05133	2.4616	49.232		1.12232	0.0534819	0	0	0.0178273	0.356546
		1.18834	1.46718	1.60131	2.10751	1.72533	2.0704	41.408		1.18834	0.041504	0	0	0.0138347	0.276693
		1.25436	1.25868	1.3049	1.75801	1.44053	1.72864	34.5727		1.25436	0.0085438	0	0.0037504	0.00409807	0.0819613
		1.32038	1.52596	1.04118	1.30932	1.29215	1.55058	31.0117		1.32038	0	0	0.0660839	0.022028	0.440559
		1.3864	1.5168	0.98138	1.11366	1.20395	1.44474	28.8947		1.3864	0	0	0.0053412	0.0017804	0.035608
		1.45242	1.53564	1.24883	1.2234	1.33596	1.60315	32.063		1.45242	0	0	0	0	0
		1.51844	1.59332	1.40071	1.62037	1.53813	1.84576	36.9152		1.51844	0	0.005203	0.0269492	0.0107174	0.214348
		1.58446	1.4499	1.59617	1.94191	1.66266	1.99519	39.9038		1.58446	0	0.102702	0.0044191	0.035707	0.714141
		1.65048	1.67867	1.59734	2.26816	1.84806	2.21767	44.3534		1.65048	0.0371915	0.143773	0	0.0603215	1.20643
		1.7165	2.10925	1.87563	2.26768	2.08419	2.50102	50.0205		1.7165	0.0444197	0.065731	0.0026314	0.037594	0.751881
		1.78252	1.76506	1.43551	1.84216	1.68091	2.01709	40.3418		1.78252	0.0813854	0.017614	0.0456844	0.0482279	0.964559
		1.84853	1.22497	1.02618	1.27057	1.17391	1.40869	28.1738		1.84853	0.0043182	0	0.0156452	0.00665447	0.133089
		1.91455	0.61452	0.44894	0.55555	0.53967	0.647604	12.9521		1.91455	0	0	0	0	0
		1.98057	0.26205	0.23381	0.1505	0.215453	0.258544	5.17088		1.98057	0	0	0	0	0
		2.04659	0.11258	0.12272	0.05887	0.0980567	0.117668	2.35336		2.04659	0	0	0.0024227	0.000807567	0.0161513
		2.11261	0.04282	0.18196	0.0425	0.0890933	0.106912	2.13824		2.11261	0	0	0.0319109	0.010637	0.212739
		2.17863	0.06829	0.18327	0.00547	0.0856767	0.102812	2.05624		2.17863	0	0	0.0343327	0.0114442	0.228885
		2.24465	0.03036	0.11829	0.06802	0.0722233	0.086668	1.73336		2.24465	0	0	0.0027525	0.0009175	0.01835
		2.31067	0	0.09449	0.03363	0.0427067	0.051248	1.02496		2.31067	0	0	0	0	0
		2.37669	0.00338	0.0548	0.02812	0.0287667	0.03452	0.6904		2.37669	0	0	0	0	0
		2.44271	0.04593	0	0	0.01531	0.018372	0.36744		2.44271	0	0	0	0	0
		2.50873	0.06121	0	0	0.0204033	0.024484	0.48968		2.50873	0	0	0	0	0
		2.57474	0.0448	0.05049	0	0.0317633	0.038116	0.76232		2.57474	0	0	0	0	0
		2.64076	0.03228	0.01542	0.00599	0.0178967	0.021476	0.42952		2.64076	0	0	0	0	0
		2.70678	0.03847	0	0.02973	0.0227333	0.02728	0.5456		2.70678	0	0	0	0	0
		2.7728	0.03947	0	0	0.0131567	0.015788	0.31576		2.7728	0	0	0	0	0
