# Supplementary material for: A polarity pathway for exocyst-dependent intracellular tube extension
Source: eLife journal article supplement (doi:10.7554/elife.65169), 2021-03-09
Supplement: supp [file elife-65169-supp-v1.zip › elife_poa_e65169_Figure_6_source_data_2.xlsx]

## Sheet: Figure 6E - source data
	Figure 6E - source data. Fluorescent intensity values for lumenal membrane and cytoplasmic measurements of PAR-6::mKate in PAR-3::ZF1::YFP background (control vs heat shock ZIF-1)
		Replicate #1
		par-3(xn59); par-6(cp60); xnEx491[t28h11.8p::cfp, pRF4] control 050119								par-3(xn59); par-6(cp60); xnEx501[hsp-16.41p::zif-1; t28h11.8p::CFP, pRF4] heat shock ZIF-1 050119
		sample #	measurement #	lumen mean intensity	cytoplasm mean intensity		lumen/cytoplasm			sample #	measurement #	lumen mean intensity	cytoplasm mean intensity		lumen/cytoplasm
		image 001	1	1.38	0.66		2.09091			image 001	1	1.99	1.73		1.15029
			2	1.36	0.77		1.76623				2	1.67	1.86		0.897849
						average	1.92857							average	1.02407
		image 002	1	2.73	1.11		2.45946			image 002	1	2.93	2.34		1.25214
			2	2.95	1.51		1.95364				2	3.01	2.31		1.30303
						average	2.20655							average	1.27758
						larvae 1 average	2.06756							larvae 1 average	1.15083
		image 003	1	3.16	0.96		3.29167			image 003	1	1.57	1.04		1.50962
			2	2.63	1.12		2.34821				2	1.38	1.25		1.104
						average	2.81994							average	1.30681
		image 004	1	2.9	1.01		2.87129			image 004	1	1.79	1.99		0.899497
			2	2.97	1.12		2.65179				2	1.96	1.97		0.994924
						average	2.76154							average	0.947211
						larvae 2 average	2.79074							larvae 2 average	1.12701
		image 005	1	2.49	0.69		3.6087			image 005	1	1.6	1.44		1.11111
			2	2.23	0.79		2.82278				2	1.62	1.57		1.03185
						average	3.21574							average	1.07148
		image 006	1	1.92	0.46		4.17391			image 006	1	2.16	1.61		1.34161
			2	1.81	0.33		5.48485				2	2.26	1.91		1.18325
						average	4.82938							average	1.26243
						larvae 3 average	4.02256							larvae 3 average	1.16695
		image 007	1	2.55	0.49		5.20408			image 007	1	1.46	1.68		0.869048
			2	2.31	0.91		2.53846				2	2.15	1.4		1.53571
						average	3.87127							average	1.20238
		image 008	1	2.66	0.83		3.20482			image 008	1	2.43	2.01		1.20896
			2	2.43	0.87		3.53805				2	2.16	2.1		1.02857
						average	3.37143							average	1.11876
						larvae 4 average	3.62135							larvae 4 average	1.16057
		image 009	1	2.53	0.94		2.69149
			2	2.25	0.79		3.22809							average	1.14826
						average	2.95979							standard deviation	0.183136
		image 010	1	2.01	1.1		1.82727
			2	2.41	0.92		2.61957
						average	2.22342
						larvae 5 average	2.5916
		image 011	1	0.57	0.3		1.9
			2	0.49	0.48		1.02083
						average	1.46042
		image 012	1	2.12	0.66		3.21212
			2	1.97	0.93		2.11828
						average	2.6652
						larvae 6 average	2.06281
						average	2.85944
						standard deviation	1.04013
			replicate #1 averages for Graphpad Superplots
				control	h.s. zif-1
				2.06756	1.15083
				2.79074	1.12701
				4.02256	1.16695
				3.62135	1.16057
				2.5916
				2.06281
			average	2.85944	1.15134
		Replicate #2
		par-3(xn59); par-6(cp60); xnEx491[t28h11.8p::cfp, pRF4] control 050119								par-3(xn59); par-6(cp60); xnEx501[hsp-16.41p::zif-1; t28h11.8p::CFP, pRF4] heat shock ZIF-1 050119
		sample #	measurement #	lumen mean intensity	cytoplasm mean intensity		lumen/cytoplasm			sample #	measurement #	lumen mean intensity	cytoplasm mean intensity		lumen/cytoplasm
		image 001	1	2.27	0.77		2.94805			image 001	1	1.57	1.22		1.28689
			2	2.28	0.75		3.04				2	1.78	1.32		1.34848
						average	2.99403							average	1.31769
		image 002	1	2.04	0.41		4.97561			image 002	1	1.51	1.82		0.82967
			2	2.41	0.9		2.67778				2	1.87	1.24		1.50806
						average	3.82669							average	1.16887
						larvae 1 average	3.41036							larvae 1 average	1.24328
		image 003	1	1.5	0.66		2.27273			image 003	1	1.49	1.3		1.14615
			2	1.32	0.65		2.03077				2	1.45	0.96		1.51042
						average	2.15175							average	1.32829
		image 004	1	2.5	1.11		2.25225			image 004	1	1.21	1.19		1.01681
			2	2.86	1.04		2.75				2	1.42	1.1		1.29091
						average	2.50113							average	1.15386
						larvae 2 average	2.32644							larvae 2 average	1.24107
		image 005	1	1.97	0.78		2.52564			image 001_000	1	0.59	0.46		1.28261
			2	1.75	0.62		2.82258				2	0.3	0.38		0.789474
						average	2.67411							average	1.03604
		image 006	1	2.17	0.61		3.55738			image 002_000	1	0.65	0.65		1
			2	2.86	0.8		3.575				2	0.29	0.54		0.537037
						average	3.56619							average	0.768519
						larvae 3 average	3.12015							larvae 3 average	0.90228
		image 007	1	2.3	0.67		3.43284			image 003_000	1	1.13	1.16		0.974138
			2	2.01	1.08		1.86111				2	1.07	1.19		0.89916
						average	2.64697							average	0.936649
		image 008	1	3.17	0.89		3.5618			image 004_000	1	1.85	1.42		1.30282
			2	2.78	1.01		2.75248				2	1.19	1.8		0.661111
						average	3.15714							average	0.981964
						larvae 4 average	2.90205							larvae 4 average	0.959306
		image 009	1	3.82	1.02		3.7451			image 005	1	0.24	0.5		0.48
			2	3.45	1.05		3.28571				2	0.33	0.36		0.916667
						average	3.51541							average	0.698333
		image 010	1	2.12	0.88		2.40909			image 006	1	1.1	1.25		0.88
			2	2.14	0.64		3.34375				2	1.13	0.88		1.28409
						average	2.87642							average	1.08205
						larvae 5 average	3.19591							larvae 5 average	0.890189
		image 011	1	3.61	1.41		2.56028			image 007	1	0.32	0.44		0.727273
			2	3.38	1.41		2.39716				2	0.24	0.3		0.8
						average	2.47872							average	0.763636
						larvae 6 average	2.47872			image 008	1	0.9	0.83		1.08434
											2	1.14	1.15		0.991304
														average	1.03782
						average	2.94441
						standard deviation	0.705527							larvae 6 average	0.900729
										image 009	1	0.87	1.16		0.75
			replicate #2 averages for Graphpad Superplots								2	1.07	1.07		1
				control	h.s. zif-1									average	0.875
				3.41036	1.24328
				2.32644	1.24107					image 010	1	1.3	0.99		1.31313
				3.12015	0.90228						2	0.98	1.21		0.809917
				2.90205	0.959306									average	1.06152
				3.19591	0.890189
				2.47872	0.900729									larvae 7 average	0.968262
					0.968262
														average	1.01502
			average	2.94	1.01502									standard deviation	0.278752
		Replicate #3
		par-3(xn59); par-6(cp60); xnEx491[t28h11.8p::cfp, pRF4] control 062820								par-3(xn59); par-6(cp60); xnEx501[hsp-16.41p::zif-1; t28h11.8p::CFP, pRF4] heat shock ZIF-1 062820
		sample #	measurement #	lumen mean intensity	cytoplasm mean intensity		lumen/cytoplasm			sample #	measurement #	lumen mean intensity	cytoplasm mean intensity		lumen/cytoplasm
		image001	1	4.57	1.59		2.87421			image001	1	2.68	2.07		1.29469
			2	4.58	1.57		2.9172				2	2.52	2.39		1.05439
						average	2.89571							average	1.17454
		image002	1	5.94	2.43		2.44444			image002	1	4.04	3.02		1.33775
			2	5.68	2.18		2.6055				2	4.21	3.03		1.38944
						average	2.52497							average	1.36359
						larvae 1 average	2.71034							larvae 1 average	1.26907
		image003	1	5.47	1.84		2.97283			image003	1	2.16	2.08		1.03846
			2	5.03	1.47		3.42177				2	2.15	1.81		1.18785
						average	3.1973							average	1.11315
		image004	1	4.12	1.17		3.52137			image004	1	2.63	2.57		1.02335
			2	3.88	1.47		2.63946				2	2.67	2.45		1.0898
						average	3.08041							average	1.05657
						larvae 2 average	3.13885							larvae 2 average	1.08486
		image005	1	4.35	1.85		2.35135			image005	1	3.04	2.31		1.31602
			2	4.29	1.85		2.31892				2	2.95	1.81		1.62983
						average	2.33514							average	1.47293
		image006	1	3.29	1.67		1.97006			image006	1	3.49	3.09		1.12945
			2	3.45	1.43		2.41259				2	3.82	2.87		1.33101
						average	2.19132							average	1.23023
						larvae 3 average	2.26323							larvae 3 average	1.35158
		image007	1	2.37	1.24		1.91129			image007	1	2.27	1.95		1.1641
			2	2.5	1.1		2.27273				2	2.17	1.7		1.27647
						average	2.09201							average	1.22029
		image008	1	3.03	1.35		2.24444			image008	1	2.93	3.21		0.912773
			2	3.18	1.09		2.91743				2	3.45	2.93		1.17747
						average	2.58094							average	1.04512
						larvae 4 average	2.33647							larvae 4 average	1.13271
		image009	1	3.15	1.44		2.1875			image009	1	0.61	0.55		1.10909
			2	3.24	1.67		1.94012				2	0.56	0.49		1.14286
						average	2.06381							average	1.12597
		image010	1	3.25	1.39		2.33813			image010	1	0.84	0.7		1.2
			2	3.28	1.56		2.10256				2	0.7	0.59		1.18644
						average	2.22035							average	1.19322
						larvae 5 average	2.14208							larvae 5 average	1.1596
		image011	1	4.46	1.73		2.57803			image011	1	2.59	2.21		1.17195
			2	4.57	1.57		2.91083				2	2.67	2.1		1.27143
						average	2.74443							average	1.22169
		image012	1	3.28	1.56		2.10256			image012	1	2.24	1.78		1.25843
			2	3.25	1.92		1.69271				2	2.67	2.27		1.17621
						average	1.89764							average	1.21732
						larvae 6 average	2.32103							larvae 6 average	1.2195
		image013	1	3.61	1.61		2.24224			image014	1	2.77	2.81		0.985765
			2	3.93	1.66		2.36747				2	3.14	2.59		1.21236
						average	2.30485							average	1.09906
		image014	1	4.29	1.92		2.23438			image015	1	1.97	2		0.985
			2	4.28	1.87		2.28877				2	1.9	1.7		1.11765
						average	2.26157							average	1.05132
						larvae 6 average	2.28321							larvae 7 average	1.07519
		image015	1	2.98	1.38		2.15942			image016	1	2.66	2.39		1.11297
			2	3.12	1.05		2.97143				2	2.54	1.81		1.40331
						average	2.56542							average	1.25814
		image016	1	4.36	1.52		2.86842			image017	1	1.87	2.04		0.916667
			2	4.27	2.12		2.01415				2	2.06	1.58		1.3038
						average	2.44129							average	1.11023
						larvae 6 average	2.50336							larvae 8 average	1.18419
						average	2.46232							average	1.18459
						standard deviation	0.446276							standard deviation	0.146459
			replicate #3 averages for Graphpad Superplots
				control	h.s. zif-1
				2.71034	1.26907
				3.13885	1.08486
				2.26323	1.35158
				2.33647	1.13271
				2.14208	1.1596
				2.32103	1.2195
				2.28321	1.07519
				2.50336	1.18419
			average	2.46232	1.18459

## Sheet: Figure 6J - source data
	Figure 6J - source data. Fluorescent intensity values for lumenal membrane and cytoplasmic measurements of PAR-3::mCherry in PAR-6::ZF1::YFP background (control vs heat shock ZIF-1)
		Replicate #1
		par-6(xn60); par-3(it301); xnEx496[t28h11.8p::CFP, pRF4] control 092718								par-6(xn60); par-3(it301); xnEx494[hsp-16.41p::zif-1; t28h11.8p::CFP, pRF4] heat shock ZIF-1 092718
		sample #	measurement #	lumen mean intensity	cytoplasm mean intensity		lumen/cytoplasm			sample #	measurement #	lumen mean intensity	cytoplasm mean intensity		lumen/cytoplasm
		ant canal L4 #1	1	0.79	0.24		3.29167			ant canal L4 #1	1	0.85	0.14		6.07143
			2	0.8	0.27		2.96296				2	0.87	0.16		5.4375
						average	3.12731							average	5.75446
		mid canal L4 #1	1	0.58	0.09		6.44444			mid canal L4 #1	1	1.57	0.26		6.03846
			2	0.57	0.12		4.75				2	1.67	0.43		3.88372
						average	5.59722							average	4.96109
						larvae 1 average	4.36227							larvae 1 average	5.35778
		ant canal L4 #2	1	0.88	0.47		1.87234			ant canal L4 #2	1	1.21	0.1		12.1
			2	0.93	0.36		2.58333				2	1.08	0.14		7.71429
						average	2.22784							average	9.90714
		mid canal L4 #2	1	0.54	0.13		4.15385			mid canal L4 #2	1	1.06	0.2		5.3
			2	0.37	0.13		2.84615				2	1.06	0.14		7.57143
						average	3.5							average	6.43571
						larvae 2 average	2.86392							larvae 2 average	8.17143
		ant canal L4 #3	1	1.62	0.23		7.04348			ant canal L4 #3	1	0.62	0.2		3.1
			2	1.7	0.23		7.3913				2	0.6	0.09		6.66667
						average	7.21739							average	4.88333
		mid canal L4 #3	1	0.67	0.21		3.19048			mid canal L4 #3	1	1.31	0.18		7.27778
			2	0.82	0.5		1.64				2	1.11	0.22		5.04545
						average	2.41524							average	6.16162
						larvae 3 average	4.81631							larvae 3 average	5.52247
		ant canal L4 #4	1	1.12	0.26		4.30769			ant canal L4 #4	1	0.47	0.2		2.35
			2	1.17	0.18		6.5				2	0.4	0.25		1.6
						average	5.40385							average	1.975
		mid canal L4 #4	1	1.52	0.17		8.94118			mid canal L4 #4	1	0.65	0.17		3.82353
			2	1.44	0.19		7.17251				2	0.58	0.26		2.23077
						average	8.05684							average	3.02715
						larvae 3 average	6.73035							larvae 4 average	2.50107
		ant canal L4 #5	1	0.69	0.31		2.22581			ant canal L4 #5	1	0.96	0.1		9.6
			2	0.78	0.39		2				2	0.91	0.1		9.1
						average	2.1129							average	9.35
		mid canal L4 #5	1	0.53	0.1		5.3			mid canal L4 #5	1	0.93	0.15		6.2
			2	0.45	0.14		4.40432				2	0.85	0.08		10.625
						average	4.85216							average	8.4125
						larvae 5 average	3.48253							larvae 5 average	8.88125
		ant canal L4 #6	1	0.91	0.14		6.5			ant canal L4 #6	1	2.02	0.32		6.3125
			2	0.79	0.08		9.875				2	1.3	0.18		7.22222
						average	8.1875							average	6.76736
		mid canal L4 #6	1	1.59	0.25		6.36			mid canal L4 #6	1	2.24	0.33		6.78788
			2	1.31	0.18		7.27778				2	2.13	0.47		4.53191
						average	6.81889							average	5.6599
						larvae 6 average	7.50319							larvae 6 average	6.21363
		ant canal L4 #7	1	0.21	0.03		7			ant canal L4 #7	1	1.31	0.26		5.03846
			2	0.16	0.04		4				2	1.29	0.13		9.92308
						average	5.5							average	7.48077
		mid canal L4 #7	1	0.47	0.18		2.61111			mid canal L4 #7	1	1.67	0.28		5.96429
			2	0.53	0.11		4.81818				2	1.37	0.21		6.52381
						average	3.71465							average	6.24405
						larvae 7 average	4.60732							larvae 7 average	6.86241
		ant canal L4 #8	1	0.73	0.19		3.84211
			2	0.7	0.17		4.11765							average	6.21572
						average	3.97988							standard deviation	2.5429
		mid canal L4 #8	1	1.12	0.19		5.89474
			2	1.26	0.55		2.29091
						average	4.09282
						larvae 8 average	4.03635
		ant canal L4 #9	1	2.27	1.37		1.65693
			2	2.17	0.68		3.19118
						average	2.42406
		mid canal L4 #9	1	1.61	0.76		2.11842
			2	1.73	1.15		1.50435
						average	1.81138
						larvae 9 average	2.11772
						average	4.50222
						standard deviation	2.23529
			replicate #1 averages for Graphpad Superplots
				control	h.s. zif-1
				4.36227	5.35778
				2.86392	8.17143
				4.81631	5.52247
				6.73035	2.50107
				3.48253	8.88125
				7.50319	6.21363
				4.60732	6.86241
				4.03635
				2.11772
			average	4.50222	6.21572
		Replicate #2
		par-6(xn60); par-3(it301); xnEx496[t28h11.8p::CFP, pRF4] control 070120								par-6(xn60); par-3(it301); xnEx494[hsp-16.41p::zif-1; t28h11.8p::CFP, pRF4] heat shock ZIF-1 070120
		sample #	measurement #	lumen mean intensity	cytoplasm mean intensity		lumen/cytoplasm			sample #	measurement #	lumen mean intensity	cytoplasm mean intensity		lumen/cytoplasm
		image002	1	1.84	0.37		4.97297			image001	1	1.5	0.29		5.17241
			2	1.95	0.83		2.3494				2	1.25	0.15		8.33333
						average	3.66119							average	6.75287
		image003	1	1.24	0.33		3.75758			image002	1	0.77	0.12		6.41667
			2	1.22	0.33		3.69697				2	0.78	0.07		11.1429
						average	3.72727							average	8.77976
						larvae 1 average	3.69423							larvae 1 average	7.76632
		image004	1	1.83	0.24		7.625			image003	1	2.2	0.29		7.58621
			2	2.07	0.57		3.63158				2	1.95	0.29		6.72414
						average	5.62829							average	7.15517
		image005	1	0.81	0.2		4.05			image004	1	0.84	0.15		5.6
			2	0.81	0.13		6.23077				2	0.77	0.1		7.7
						average	5.14038							average	6.65
						larvae 2 average	5.38434							larvae 2 average	6.90259
		image006	1	0.88	0.16		5.5			image005	1	1.11	0.12		9.25
			2	0.97	0.17		5.70588				2	1.23	0.38		3.23684
						average	5.60294							average	6.24342
		image007	1	0.93	0.19		4.89474			image006	1	1.79	0.37		4.83784
			2	1.15	0.26		4.42308				2	1.82	0.71		2.56338
						average	4.65891							average	3.70061
						larvae 3 average	5.13092							larvae 3 average	4.97202
		image008	1	0.66	0.09		7.33333			image007	1	0.96	0.15		6.4
			2	0.72	0.27		2.66667				2	0.85	0.08		10.625
						average	5							average	8.5125
		image009	1	1.15	0.22		5.22727			image008	1	1.71	0.48		3.5625
			2	0.8	0.11		7.27273				2	1.45	0.41		3.53659
						average	6.25							average	3.54954
						larvae 4 average	5.625							larvae 4 average	6.03102
		image011	1	1.02	0.36		2.83333			image009	1	1.39	0.15		9.26667
			2	0.95	0.16		5.9375				2	1.54	0.26		5.92308
						average	4.38542							average	7.59487
		image012	1	1.11	0.43		2.5814			image010	1	1.48	0.33		4.48485
			2	0.99	0.25		3.96				2	1.51	0.44		3.43182
						average	3.2707							average	3.95833
						larvae 5 average	3.82806							larvae 5 average	5.7766
		image013	1	1.35	0.27		5			image011	1	1.22	0.24		5.08333
			2	1.26	0.33		3.81818				2	1.35	0.31		4.35484
						average	4.40909							average	4.71909
		image014	1	1.8	0.8		2.25			image012	1	0.86	0.08		10.75
			2	1.56	0.59		2.64407				2	0.76	0.09		8.44444
						average	2.44703							average	9.59722
						larvae 6 average	3.42806							larvae 6 average	7.15815
		image015	1	1	0.28		3.57143			image013	1	1.89	0.38		4.97368
			2	0.86	0.16		5.375				2	2.14	0.71		3.01408
						average	4.47321							average	3.99388
		image016	1	1.18	0.33		3.57576			image014	1	1.48	0.47		3.14894
			2	1.27	0.68		1.86765				2	1.41	0.48		2.9375
						average	2.7217							average	3.04322
						larvae 7 average	3.59746							larvae 7 average	3.51855
		image017	1	1.38	0.63		2.19048			image015	1	1.41	0.16		8.8125
			2	1.39	0.63		2.20635				2	1.45	0.16		9.0625
						average	2.19841							average	8.9375
		image018	1	0.98	0.4		2.45			image016	1	1.76	0.41		4.29268
			2	1.05	0.67		1.56716				2	1.88	0.7		2.68571
						average	2.00858							average	3.4892
						larvae 8 average	2.1035							larvae 8 average	6.21335
						average	4.09895							average	6.04232
						standard deviation	1.68184							standard deviation	2.62753
			replicate #2 averages for Graphpad Superplots
				control	h.s. zif-1
				3.69423	7.76632
				5.38434	6.90259
				5.13092	4.97202
				5.625	6.03102
				3.82806	5.7766
				3.42806	7.15815
				3.59746	3.51855
				2.1035	6.21335
			average	4.09895	6.04232
		Replicate #3
		par-6(xn60); par-3(it301); xnEx496[t28h11.8p::CFP, pRF4] control 070320								par-6(xn60); par-3(it301); xnEx494[hsp-16.41p::zif-1; t28h11.8p::CFP, pRF4] heat shock ZIF-1 070320
		sample #	measurement #	lumen mean intensity	cytoplasm mean intensity		lumen/cytoplasm			sample #	measurement #	lumen mean intensity	cytoplasm mean intensity		lumen/cytoplasm
		image002	1	0.94	0.1		9.4			image001	1	2.17	0.35		6.2
			2	0.9	0.1		9				2	2.29	0.3		7.63333
						average	9.2							average	6.91667
		image003	1	1.01	0.6		1.68333			image002	1	0.82	0.29		2.82759
			2	0.96	0.28		3.42857				2	0.69	0.1		6.9
						average	2.55595							average	4.86379
						larvae 1 average	5.87798							larvae 1 average	5.89023
		image004	1	1.21	0.44		2.75			image003	1	2.9	0.89		3.25843
			2	0.76	0.52		1.46154				2	2.86	1.18		2.42373
						average	2.10577							average	2.84108
		image005	1	1.63	0.83		1.96386			image004	1	1.68	0.3		5.6
			2	0.95	0.27		3.51852				2	1.45	0.5		2.9
						average	2.74119							average	4.25
						larvae 2 average	2.42348							larvae 2 average	3.54554
		image006	1	2.17	0.33		6.57576			image005	1	2.81	0.45		6.24444
			2	1.85	0.32		5.78125				2	2.31	0.49		4.71429
						average	6.1785							average	5.47937
		image007	1	1.42	0.35		4.05714			image006	1	1.56	0.1		15.6
			2	1.18	0.23		5.13043				2	1.54	0.12		12.8333
						average	4.59379							average	14.2167
						larvae 3 average	5.38615							larvae 3 average	9.84802
		image008	1	1.07	0.1		10.7			image008	1	0.45	0.1		4.5
			2	0.92	0.1		9.2				2	0.43	0.09		4.77778
						average	9.95							average	4.63889
		image009	1	1.7	0.29		5.86207			image009	1	1.14	0.23		4.95652
			2	1.42	0.18		7.88889				2	1.13	0.27		4.18519
						average	6.87548							average	4.57085
						larvae 4 average	8.41274							larvae 4 average	4.60487
		image010	1	1.51	0.19		7.94737			image010	1	2.11	0.36		5.86111
			2	1.5	0.16		9.375				2	2.34	0.63		3.71429
						average	8.66118							average	4.7877
		image011	1	2.02	0.84		2.40476			image011	1	1.28	0.13		9.84615
			2	1.93	1.16		1.66379				2	1.17	0.1		11.7
						average	2.03428							average	10.7731
						larvae 5 average	5.34773							larvae 5 average	7.78039
		image012	1	0.92	0.16		5.75			image012	1	0.53	0.08		6.625
			2	1.04	0.16		6.5				2	0.62	0.07		8.85714
						average	6.125							average	7.74107
		image013	1	1.53	0.15		10.2			image013	1	1.13	0.13		8.69231
			2	1.47	0.18		8.16667				2	1.13	0.12		9.41667
						average	9.18333							average	9.05449
						larvae 6 average	7.65417							larvae 6 average	8.39778
		image014	1	2.28	0.45		5.06667			image014	1	1.7	0.31		5.48387
			2	2.31	0.45		5.13333				2	1.55	0.29		5.34483
						average	5.1							average	5.41435
		image015	1	1.32	0.44		3			image015	1	1.2	0.16		7.5
			2	1.02	0.24		4.25				2	1.17	0.1		11.7
						average	3.625							average	9.6
						larvae 7 average	4.3625							larvae 7 average	7.50717
		image016	1	1.9	0.4		4.75			image016	1	2.09	0.19		11
			2	1.69	0.29		5.82759				2	1.83	0.24		7.625
						average	5.28879							average	9.3125
		image017	1	1.83	0.53		3.45283			image017	1	1.43	0.2		7.15
			2	1.25	0.27		4.62963				2	1.21	0.13		9.30769
						average	4.04123							average	8.22885
						larvae 8 average	4.66501							larvae 8 average	8.77067
		image018	1	1.99	0.72		2.76389			image018	1	0.77	0.24		3.20833
			2	1.75	0.71		2.46479				2	0.82	0.1		8.2
						average	2.61434							average	5.70417
		image019	1	0.73	0.38		1.92105			image019	1	1.8	0.46		3.91304
			2	1	0.42		2.38095				2	1.76	0.29		6.06897
						average	2.151							average	4.991
						larvae 8 average	2.38267							larvae 8 average	5.34759
						average	5.16805							average	6.8547
						standard deviation	2.73198							standard deviation	3.10938
			replicate #3 averages for Graphpad Superplots
				control	h.s.-zif-1
				5.87798	5.89023
				2.42348	3.54554
				5.38615	9.84802
				8.41274	4.60487
				5.34773	7.78039
				7.65417	8.39778
				4.3625	7.50717
				4.66501	8.77067
				2.38267	5.34759
			average	5.16805	6.8547
