# Supplementary material for: A polarity pathway for exocyst-dependent intracellular tube extension
Source: eLife journal article supplement (doi:10.7554/elife.65169), 2021-03-09
Supplement: supp [file elife-65169-supp-v1.zip › elife_poa_e65169_Figure_7_source_data_1.xlsx]

## Sheet: Figure 7C - source data
		Figure 7C - source data. Fluorescent intensity values for line trace measurements of ZF1::YFP::CDC-42; PAR-6::mKate (control)
		cdc-42(xn65); par-6(cp60) control 092920
		image003
		red channel (par-6-mkate)	measurements				multiply to fit to y-axis		yfp channel (zf1::yfp::cdc-42)	measurements					multiply to fit to y-axis
		distance (microns)	m1	m2	m3	avg	*12		distance (microns)	m1	m2	m3	avg	normalize to red channel	*12
		-1.44	1.02356	0.96219	0.96806	0.984603	11.8152		0	2.76567	3.6631	4.82082	3.74986	1.87493	22.4992
		-1.368	0.83993	0.85158	0.98744	0.892983	10.7158		0.07222	3.09829	3.4107	6.02536	4.17812	2.08906	25.0687
		-1.296	1.01646	1.08087	1.4227	1.17334	14.0801		0.14444	3.56906	3.5082	7.37161	4.81629	2.40814	28.8977
		-1.224	1.1869	0.96281	1.5447	1.23147	14.7776		0.21666	4.28841	3.2252	8.96121	5.49161	2.7458	32.9496
		-1.152	1.27297	0.93739	1.98834	1.39957	16.7948		0.28888	4.95041	3.65	10.2442	6.28155	3.14077	37.6893
		-1.08	1.43566	1.08553	1.85248	1.45789	17.4947		0.3611	6.30764	4.3	10.489	7.03221	3.5161	42.1933
		-1.008	1.85959	1.29074	2.53031	1.89355	22.7226		0.43332	7.83081	5.2474	10.4222	7.83346	3.91673	47.0007
		-0.936	2.3309	1.51896	3.15875	2.3362	28.0344		0.50554	9.14593	7.566	10.3555	9.02248	4.51124	54.1349
		-0.864	2.73002	2.24919	4.0869	3.02204	36.2644		0.57776	9.5836	8.7848	10.8258	9.73141	4.8657	58.3884
		-0.792	3.22416	2.86492	5.42198	3.83702	46.0442		0.64998	9.97285	10.7853	11.6638	10.8073	5.40367	64.844
		-0.72	4.38782	3.22468	6.54368	4.71873	56.6247		0.7222	10.0194	12.3021	11.3085	11.21	5.605	67.26
		-0.648	5.18418	4.42341	7.09942	5.569	66.828		0.79443	10.9255	13.3789	11.4078	11.9041	5.95204	71.4244
		-0.576	5.83042	5.55178	6.83551	6.07257	72.8708		0.86665	10.9091	13.9764	10.5092	11.7982	5.89912	70.7894
		-0.504	6.19378	5.82607	6.70939	6.24308	74.917		0.93887	10.144	14.1861	9.31696	11.2157	5.60785	67.2942
		-0.432	5.53601	5.64435	6.22103	5.80046	69.6056		1.01109	9.0096	13.5133	8.08596	10.203	5.10148	61.2177
		-0.36	4.98355	5.11617	6.09762	5.39911	64.7894		1.08331	7.72575	11.585	7.69734	9.0027	4.50135	54.0162
		-0.288	4.4247	4.63027	6.34026	5.13174	61.5809		1.15553	7.19303	9.172	8.31198	8.22567	4.11284	49.354
		-0.216	4.11464	4.01031	5.79575	4.64023	55.6828		1.22775	6.77677	7.175	8.28365	7.41181	3.7059	44.4708
		-0.144	4.0417	3.6752	5.85188	4.52293	54.2751		1.29997	6.1928	6.1232	8.32771	6.88124	3.44062	41.2874
		-0.072	4.00956	3.61611	5.2125	4.27939	51.3527		1.37219	5.81847	5.9744	8.23492	6.67593	3.33797	40.0556
		0	4.1463	3.64448	4.97158	4.25412	51.0494		1.44441	5.80543	5.4915	7.6111	6.30268	3.15134	37.8161
		0.07222	4.11423	3.81786	4.43046	4.12085	49.4502		1.51663	6.06596	5.8246	6.46657	6.11904	3.05952	36.7143
		0.14444	4.60983	3.77811	4.94531	4.44442	53.333		1.58885	6.35842	5.7275	6.6167	6.23421	3.1171	37.4052
		0.21666	4.83832	4.09988	4.8143	4.58417	55.01		1.66107	7.09704	5.7311	6.40375	6.41063	3.20532	38.4638
		0.28888	4.98278	4.43951	4.91912	4.78047	57.3656		1.73329	7.63919	6.8274	6.94153	7.13604	3.56802	42.8162
		0.3611	5.6691	4.95422	5.75185	5.45839	65.5007		1.80551	8.89854	8.5817	8.10013	8.52679	4.2634	51.1607
		0.43332	6.00125	5.2988	6.94643	6.08216	72.9859		1.87773	10.1068	9.4229	9.62921	9.71962	4.85981	58.3177
		0.50554	6.0032	6.07449	7.17585	6.41785	77.0142		1.94995	10.8078	11.4873	10.9812	11.0921	5.54605	66.5526
		0.57776	5.71233	5.78542	6.36987	5.95587	71.4705		2.02217	11.4115	12.4346	12.1809	12.009	6.0045	72.054
		0.64998	4.83468	5.32869	5.57586	5.24641	62.9569		2.09439	11.1678	12.7796	12.7432	12.2302	6.11509	73.3811
		0.7222	3.97438	4.54235	4.80287	4.43987	53.2784		2.16661	10.9575	12.5521	12.4921	12.0006	6.00029	72.0035
		0.79443	3.51583	3.621	3.93123	3.68935	44.2722		2.23884	10.78	12.6597	12.8962	12.112	6.05598	72.6718
		0.86665	2.83525	3.2555	3.09803	3.06293	36.7551		2.31106	10.2356	11.9942	13.6013	11.9437	5.97186	71.6623
		0.93887	2.32224	2.35054	2.10654	2.25977	27.1173		2.38328	10.6003	11.4115	14.3128	12.1082	6.0541	72.6492
		1.01109	1.72394	1.96847	1.8869	1.85977	22.3172		2.4555	10.6135	11.8486	14.0858	12.1826	6.09131	73.0957
		1.08331	1.36258	1.76105	1.51035	1.54466	18.5359		2.52772	10.0353	12.715	12.8364	11.8622	5.93112	71.1735
		1.15553	1.21692	1.41548	0.98076	1.20439	14.4526		2.59994	8.37934	13.5481	10.9872	10.9716	5.48578	65.8293
		1.22775	0.98679	1.47909	0.93697	1.13428	13.6114		2.67216	7.15726	14.9351	9.9223	10.6716	5.33578	64.0293
		1.29997	0.92928	1.26886	0.90038	1.03284	12.3941		2.74438	6.68668	15.603	8.57525	10.2883	5.14416	61.7299
		1.37219	0.89842	1.23385	1.03988	1.05738	12.6886		2.8166	6.64439	14.8266	7.01733	9.49611	4.74805	56.9766
		1.44441	0.56024	0.91454	0.98826	0.821013	9.85216		2.88882	6.4194	14.2472	6.15001	8.93887	4.46943	53.6332
		image004
		red channel (par-6-mkate)	measurements				multiply to fit to y-axis		yfp channel (zf1::yfp::cdc-42)	measurements					multiply to fit to y-axis
		distance (microns)	m1	m2	m3	avg	*12		distance (microns)	m1	m2	m3	avg	normalize to red channel	*12
		0	2.03723	2.35086	3.16369	2.51726	30.2071		0	8.21713	9.23969	7.86393	8.44025	4.22013	50.6415
		0.07222	2.2766	2.52029	3.46973	2.75554	33.0665		0.07222	8.91241	9.9655	8.07904	8.98565	4.49282	53.9139
		0.14444	2.12458	2.77807	3.30039	2.73435	32.8122		0.14444	9.3764	10.7724	8.92816	9.69234	4.84617	58.154
		0.21666	2.45636	3.09212	3.2267	2.92506	35.1007		0.21666	10.2096	10.9893	9.49056	10.2298	5.11491	61.3789
		0.28888	2.76224	2.94328	3.92883	3.21145	38.5374		0.28888	10.7645	10.8644	9.63356	10.4208	5.21041	62.5249
		0.3611	3.52305	3.0004	4.36163	3.62836	43.5403		0.3611	11.3737	12.1793	10.2464	11.2665	5.63324	67.5988
		0.43332	3.28036	3.3339	4.95936	3.85787	46.2945		0.43332	11.4711	11.8768	10.8518	11.3999	5.69995	68.3994
		0.50554	3.03258	3.6741	4.94932	3.88533	46.624		0.50554	11.8383	11.988	12.336	12.0541	6.02705	72.3246
		0.57776	3.44398	3.76022	5.46975	4.22465	50.6958		0.57776	11.4204	12.7203	13.1592	12.4333	6.21666	74.5999
		0.64998	3.68997	4.14217	5.63787	4.49	53.88		0.64998	12.2294	12.6762	13.274	12.7266	6.36328	76.3593
		0.7222	4.22681	4.83295	6.48535	5.1817	62.1804		0.7222	12.7037	12.7912	12.9822	12.8257	6.41284	76.9541
		0.79443	5.39389	5.82076	7.19364	6.1361	73.6332		0.79443	13.1481	12.1354	13.643	12.9755	6.48775	77.853
		0.86665	7.03659	6.3521	8.90619	7.43163	89.1795		0.86665	12.8895	12.1068	12.8395	12.6119	6.30597	75.6716
		0.93887	7.67158	6.92252	9.93172	8.17527	98.1033		0.93887	12.1486	11.1123	12.5258	11.9289	5.96446	71.5735
		1.01109	7.61592	6.78503	10.2968	8.23258	98.7909		1.01109	10.3541	9.65278	11.454	10.4869	5.24347	62.9217
		1.08331	6.59002	5.84176	9.09659	7.17612	86.1135		1.08331	8.74782	8.47769	9.77387	8.99979	4.4999	53.9988
		1.15553	6.26966	5.33749	8.07112	6.55942	78.7131		1.15553	7.85756	7.90574	8.59234	8.11855	4.05927	48.7113
		1.22775	5.72028	4.62639	7.42991	5.92553	71.1063		1.22775	7.20582	7.60999	7.32644	7.38075	3.69037	44.2845
		1.29997	5.36014	4.55327	6.80967	5.57436	66.8923		1.29997	6.61471	7.19474	6.50774	6.7724	3.3862	40.6344
		1.37219	5.2709	4.3835	5.97836	5.21092	62.531		1.37219	6.36337	7.58238	7.00718	6.98431	3.49216	41.9059
		1.44441	4.9731	4.40634	6.27037	5.2166	62.5992		1.44441	6.81262	7.64253	7.22533	7.22683	3.61341	43.361
		1.51663	5.2015	4.4256	6.11428	5.24713	62.9655		1.51663	7.28555	8.40341	7.47592	7.72163	3.86081	46.3298
		1.58885	5.81403	5.31877	6.75488	5.96256	71.5507		1.58885	8.09508	9.01882	7.76425	8.29272	4.14636	49.7563
		1.66107	6.93315	6.11605	7.23409	6.7611	81.1332		1.66107	9.3086	10.3384	9.11468	9.58722	4.79361	57.5233
		1.73329	7.38565	6.72329	8.2938	7.46758	89.611		1.73329	11.3063	11.8975	10.7562	11.32	5.66	67.92
		1.80551	7.51002	7.73468	9.34389	8.1962	98.3544		1.80551	13.2021	13.8622	11.923	12.9958	6.4979	77.9748
		1.87773	6.79072	7.97713	9.0069	7.92492	95.099		1.87773	13.8798	14.4281	12.7688	13.6922	6.84612	82.1535
		1.94995	6.04506	7.27722	7.82625	7.04951	84.5941		1.94995	13.5719	14.5007	12.6596	13.5774	6.7887	81.4644
		2.02217	5.16464	5.88183	7.21144	6.08597	73.0316		2.02217	13.8193	14.2382	12.902	13.6532	6.82658	81.9189
		2.09439	4.35273	4.82199	5.41797	4.86423	58.3708		2.09439	14.0501	14.0367	12.9993	13.6954	6.84768	82.1721
		2.16661	3.63826	3.9475	4.68141	4.08906	49.0687		2.16661	13.5625	14.1696	12.3045	13.3455	6.67276	80.0732
		2.23884	3.10113	3.80376	4.61236	3.83908	46.069		2.23884	13.0339	14.022	12.3753	13.1437	6.57186	78.8623
		2.31106	3.05756	3.13359	4.11085	3.434	41.208		2.31106	12.9459	13.314	12.2206	12.8268	6.41342	76.9611
		2.38328	3.08384	3.38017	3.71274	3.39225	40.707		2.38328	13.1229	12.4466	11.8577	12.4757	6.23787	74.8544
		2.4555	3.1537	3.01275	3.73938	3.30194	39.6233		2.4555	13.0323	12.2488	11.0252	12.1021	6.05105	72.6126
		2.52772	2.66875	2.81775	3.65718	3.04789	36.5747		2.52772	12.3895	11.4039	10.7408	11.5114	5.75568	69.0682
		2.59994	2.67212	2.72363	3.54402	2.97992	35.7591		2.59994	11.5509	10.9062	11.1158	11.191	5.59548	67.1457
		2.67216	2.25105	2.72438	3.72403	2.89982	34.7978		2.67216	10.734	11.2669	10.8371	10.946	5.47302	65.6762
		2.74438	1.95991	2.61724	3.68249	2.75321	33.0386		2.74438	9.41192	11.1891	10.688	10.4297	5.21485	62.5782
		2.8166	1.85162	2.36052	3.97345	2.72853	32.7424		2.8166	8.84916	11.0839	10.6731	10.202	5.10102	61.2123
		2.88882	1.51274	2.01067	4.26448	2.59596	31.1516		2.88882	7.89168	10.5808	9.30981	9.26076	4.63038	55.5646
		image006
		red channel (par-6-mkate)	measurements				multiply to fit to y-axis		yfp channel (zf1::yfp::cdc-42)	measurements					multiply to fit to y-axis
		distance (microns)	m1	m2	m3	avg	*12		distance (microns)	m1	m2	m3	avg	normalize to red channel	*12
		0	2.20787	2.15702	2.07746	2.14745	25.7694		0	9.428	8.4724	10.0596	9.32	4.66	55.92
		0.07222	2.37586	2.25952	2.01346	2.21628	26.5954		0.07222	9.64299	7.9419	12.0913	9.89206	4.94603	59.3524
		0.14444	2.52698	2.04325	2.2989	2.28971	27.4765		0.14444	9.89914	7.0249	12.6403	9.85478	4.92739	59.1287
		0.21666	2.17763	2.12258	2.38046	2.22689	26.7227		0.21666	9.51042	7.5325	12.5475	9.86347	4.93174	59.1808
		0.28888	2.46185	2.37832	2.36524	2.4018	28.8216		0.28888	9.96923	7.7904	11.2435	9.66771	4.83385	58.0063
		0.3611	2.40401	2.56203	2.19996	2.38867	28.664		0.3611	10.0123	8.1517	10.6501	9.60469	4.80235	57.6282
		0.43332	2.40646	2.96476	2.50848	2.62657	31.5188		0.43332	9.74519	8.365	10.279	9.46306	4.73153	56.7784
		0.50554	2.3855	3.0784	2.39559	2.61983	31.438		0.50554	9.62438	8.201	10.0466	9.29066	4.64533	55.744
		0.57776	2.79747	3.2651	2.68466	2.91574	34.9889		0.57776	9.06285	8.5177	9.8643	9.14828	4.57414	54.8897
		0.64998	3.26786	3.45031	2.57533	3.09783	37.174		0.64998	9.42609	9.6461	10.0543	9.70883	4.85441	58.253
		0.7222	3.40252	3.57116	3.2108	3.39483	40.7379		0.7222	10.1798	10.7093	11.0511	10.6467	5.32336	63.8804
		0.79443	4.17284	4.54725	4.23766	4.31925	51.831		0.79443	11.5184	12.5571	11.7113	11.9289	5.96447	71.5737
		0.86665	4.83951	5.33567	4.712	4.96239	59.5487		0.86665	12.0792	12.3616	12.2459	12.2289	6.11444	73.3733
		0.93887	5.92953	5.81987	5.18565	5.64502	67.7402		0.93887	12.2487	11.2125	12.7676	12.0763	6.03813	72.4576
		1.01109	5.99387	5.2441	5.20484	5.48094	65.7712		1.01109	11.0898	9.0464	12.0224	10.7195	5.35976	64.3171
		1.08331	5.93013	4.51698	5.48175	5.30962	63.7154		1.08331	9.60041	8.0513	10.1758	9.27584	4.63792	55.655
		1.15553	5.42009	3.7526	4.84262	4.67177	56.0612		1.15553	8.02927	7.1647	8.7404	7.97812	3.98906	47.8687
		1.22775	4.96409	3.10532	3.90361	3.99101	47.8921		1.22775	7.07161	5.8856	7.3935	6.78357	3.39179	40.7014
		1.29997	4.41916	2.90231	3.65309	3.65819	43.8982		1.29997	6.71637	5.5608	6.8042	6.36046	3.18023	38.1627
		1.37219	4.00378	2.74638	3.10589	3.28535	39.4242		1.37219	6.71504	5.367	6.8755	6.31918	3.15959	37.9151
		1.44441	4.39796	2.87082	3.02699	3.43192	41.1831		1.44441	6.54329	5.5642	6.7431	6.28353	3.14176	37.7012
		1.51663	4.50596	3.03346	3.27249	3.60397	43.2476		1.51663	6.86755	6.4323	7.6614	6.98708	3.49354	41.9225
		1.58885	4.61918	3.57475	3.89055	4.02816	48.3379		1.58885	8.36501	7.0966	8.9394	8.13367	4.06684	48.802
		1.66107	4.94288	3.94316	4.69351	4.52652	54.3182		1.66107	10.0145	8.1611	10.3606	9.51205	4.75603	57.0723
		1.73329	5.57006	4.5219	4.82002	4.97066	59.6479		1.73329	11.9084	9.2058	10.8243	10.6462	5.32308	63.877
		1.80551	5.97261	4.37968	4.54936	4.96722	59.6066		1.80551	13.2572	10.6838	10.2479	11.3963	5.69815	68.3779
		1.87773	5.40513	4.39363	4.02836	4.60904	55.3085		1.87773	12.8648	11.0092	9.9884	11.2875	5.64374	67.7249
		1.94995	4.41047	3.85108	2.9319	3.73115	44.7738		1.94995	12.5704	11.8026	9.747	11.3733	5.68666	68.2399
		2.02217	3.50561	3.54036	2.98272	3.3429	40.1148		2.02217	11.3084	11.7506	8.9323	10.6638	5.33188	63.9826
		2.09439	3.5218	3.22398	2.70609	3.15062	37.8075		2.09439	10.3902	11.2583	9.4896	10.3794	5.18969	62.2763
		2.16661	2.91286	3.135	2.83907	2.96231	35.5477		2.16661	9.622	10.8919	9.7552	10.0897	5.04485	60.5382
		2.23884	2.92305	2.45967	2.45914	2.61395	31.3674		2.23884	9.34828	9.6712	10.7916	9.93703	4.96851	59.6222
		2.31106	2.79194	2.08389	2.01585	2.29723	27.5667		2.31106	9.88989	8.5617	10.3741	9.60856	4.80428	57.6514
		2.38328	2.60337	1.74341	1.64468	1.99715	23.9658		2.38328	10.7305	7.5525	8.9305	9.07116	4.53558	54.4269
		2.4555	2.35043	1.72521	1.56459	1.88008	22.5609		2.4555	10.4064	6.0859	6.5897	7.69399	3.847	46.1639
		2.52772	1.93518	1.4137	1.49829	1.61572	19.3887		2.52772	8.30987	4.9349	4.6381	5.96096	2.98048	35.7657
		2.59994	1.98185	1.48431	1.44665	1.6376	19.6512		2.59994	7.21967	4.3881	3.229	4.94559	2.47279	29.6735
		2.67216	1.91939	1.49771	1.31887	1.57866	18.9439		2.67216	6.09851	3.9839	2.6031	4.2285	2.11425	25.371
		2.74438	1.68677	1.15338	1.32837	1.38951	16.6741		2.74438	5.37437	3.3809	2.088	3.61442	1.80721	21.6865
		2.8166	1.3598	1.04723	1.13569	1.18091	14.1709		2.8166	5.30348	2.8301	1.7018	3.27846	1.63923	19.6708
		2.88882	1.48193	1.20456	1.45707	1.38119	16.5742		2.88882	5.50284	2.5258	1.5952	3.20795	1.60397	19.2477
		image018
		red channel (par-6-mkate)	measurements				multiply to fit to y-axis		yfp channel (zf1::yfp::cdc-42)	measurements					multiply to fit to y-axis
		distance (microns)	m1	m2	m3	avg	*12		distance (microns)	m1	m2	m3	avg	normalize to red channel	*12
		0	1.6178	1.68265	1.58781	1.62942	19.553		0	4.67092	4.4598	5.0692	4.73331	2.36665	28.3998
		0.07222	1.70329	1.52117	1.62892	1.61779	19.4135		0.07222	5.56542	5.2728	5.4822	5.44014	2.72007	32.6408
		0.14444	2.03009	1.82232	1.61082	1.82108	21.8529		0.14444	5.68572	6.0225	6.2828	5.99701	2.9985	35.982
		0.21666	2.08577	1.88485	1.79373	1.92145	23.0574		0.21666	5.77758	6.5076	7.0997	6.46163	3.23081	38.7698
		0.28888	2.46031	2.02448	2.05527	2.18002	26.1602		0.28888	6.64929	7.0706	8.3495	7.35646	3.67823	44.1388
		0.3611	2.50476	2.3319	2.24133	2.35933	28.312		0.3611	7.37784	7.7131	9.7669	8.28595	4.14297	49.7157
		0.43332	2.29384	2.31323	2.68935	2.43214	29.1857		0.43332	8.43224	9.3476	11.5737	9.78451	4.89226	58.7071
		0.50554	2.43514	2.59211	2.84928	2.62551	31.5061		0.50554	9.51164	11.1354	13.0175	11.2215	5.61076	67.3291
		0.57776	2.71252	2.7128	3.41675	2.94736	35.3683		0.57776	10.4941	12.6934	14.4514	12.5463	6.27314	75.2777
		0.64998	3.31846	2.9817	4.00135	3.43384	41.206		0.64998	11.7425	14.1739	15.4491	13.7885	6.89426	82.7311
		0.7222	3.38532	3.66353	4.55491	3.86792	46.415		0.7222	12.4138	14.3682	15.2837	14.0219	7.01095	84.1314
		0.79443	3.96776	4.36681	5.12023	4.48493	53.8192		0.79443	12.5754	14.4681	14.6051	13.8829	6.94143	83.2972
		0.86665	4.92231	4.55926	5.29778	4.92645	59.1174		0.86665	12.6494	13.4551	13.1579	13.0875	6.54373	78.5248
		0.93887	5.04214	4.76247	4.77872	4.86111	58.3333		0.93887	11.9314	12.3311	11.5679	11.9435	5.97173	71.6608
		1.01109	4.90644	4.58932	4.68939	4.72838	56.7406		1.01109	10.9335	10.7469	9.631	10.4371	5.21856	62.6227
		1.08331	4.79974	4.45294	4.32872	4.52713	54.3256		1.08331	8.81749	9.0767	7.823	8.5724	4.2862	51.4344
		1.15553	4.41348	4.35603	4.1198	4.29644	51.5572		1.15553	7.16171	7.8242	6.6872	7.22437	3.61219	43.3462
		1.22775	3.75313	3.66668	3.68014	3.69998	44.3998		1.22775	6.85312	7.0882	6.0964	6.67924	3.33962	40.0754
		1.29997	3.44865	3.33212	3.4175	3.39942	40.7931		1.29997	6.11004	6.4617	5.7855	6.11908	3.05954	36.7145
		1.37219	3.35717	3.27074	3.4154	3.34777	40.1732		1.37219	6.27742	6.0378	5.3554	5.89021	2.9451	35.3412
		1.44441	3.24697	3.26066	3.24719	3.25161	39.0193		1.44441	5.8207	6.4368	5.4639	5.90713	2.95357	35.4428
		1.51663	3.31119	3.25177	3.36483	3.30926	39.7112		1.51663	6.11183	6.6182	5.6012	6.11041	3.0552	36.6625
		1.58885	3.63188	3.61536	3.3183	3.52185	42.2622		1.58885	6.7773	6.9434	6.2482	6.6563	3.32815	39.9378
		1.66107	4.19906	3.75507	3.48603	3.81339	45.7606		1.66107	8.16465	7.9737	7.0591	7.73248	3.86624	46.3949
		1.73329	4.67709	4.17523	4.18521	4.34584	52.1501		1.73329	9.46314	8.7653	8.4074	8.87861	4.43931	53.2717
		1.80551	4.83449	4.61748	4.6021	4.68469	56.2163		1.80551	11.6057	10.583	9.9427	10.7105	5.35523	64.2628
		1.87773	4.37395	4.25407	4.98051	4.53618	54.4341		1.87773	12.6975	11.5778	11.4108	11.8954	5.94768	71.3722
		1.94995	3.41187	4.28201	4.87951	4.19113	50.2936		1.94995	12.7407	12.8187	13.4371	12.9988	6.49941	77.993
		2.02217	2.75877	4.24536	4.34695	3.78369	45.4043		2.02217	12.2529	13.5719	14.6243	13.483	6.74151	80.8981
		2.09439	2.47046	3.39034	3.86539	3.24206	38.9048		2.09439	12.0018	13.8116	14.8148	13.5427	6.77137	81.2564
		2.16661	2.28228	3.21516	3.31566	2.9377	35.2524		2.16661	11.2667	13.1155	13.9744	12.7855	6.39277	76.7132
		2.23884	2.23934	2.53394	2.74832	2.5072	30.0864		2.23884	10.1138	12.6812	13.1709	11.9886	5.99432	71.9318
		2.31106	2.27314	2.35672	2.49018	2.37335	28.4802		2.31106	9.20222	11.9687	11.2615	10.8108	5.4054	64.8648
		2.38328	2.19307	2.53122	2.19723	2.30717	27.6861		2.38328	7.91811	10.2755	10.1584	9.45067	4.72534	56.704
		2.4555	2.04415	2.62473	2.21972	2.2962	27.5544		2.4555	6.79645	9.5439	9.2659	8.53542	4.26771	51.2125
		2.52772	1.83162	2.56381	2.35528	2.25024	27.0028		2.52772	5.43062	7.9558	7.9031	7.09651	3.54825	42.579
		2.59994	1.91916	2.33033	2.19756	2.14902	25.7882		2.59994	4.88959	7.3999	7.4334	6.5743	3.28715	39.4458
		2.67216	1.85906	2.73092	2.01371	2.20123	26.4148		2.67216	4.36185	6.598	6.8668	5.94222	2.97111	35.6533
		2.74438	1.78416	2.61154	1.90221	2.0993	25.1916		2.74438	4.32723	6.2435	6.1982	5.58964	2.79482	33.5379
		2.8166	1.71787	2.49387	2.22616	2.14597	25.7516		2.8166	4.46452	5.8827	5.9561	5.43444	2.71722	32.6066
		2.88882	1.54789	2.43195	2.11629	2.03204	24.3845		2.88882	5.15959	6.3979	6.0359	5.86446	2.93223	35.1868
		image014
		red channel (par-6-mkate)	measurements				multiply to fit to y-axis		yfp channel (zf1::yfp::cdc-42)	measurements					multiply to fit to y-axis
		distance (microns)	m1	m2	m3	avg	*12		distance (microns)	m1	m2	m3	avg	normalize to red channel	*12
		0	1.60176	1.48209	1.20976	1.4312	17.1744		0	4.81455	5.41372	3.9051	4.71112	2.35556	28.2667
		0.07222	1.68114	1.60092	1.48574	1.58927	19.0712		0.07222	5.53891	5.57644	4.0262	5.04718	2.52359	30.2831
		0.14444	2.05061	1.80408	1.44776	1.76748	21.2098		0.14444	5.60569	6.5189	4.6588	5.59446	2.79723	33.5668
		0.21666	2.14625	1.98873	1.42335	1.85278	22.2333		0.21666	5.9689	7.2779	5.4102	6.219	3.1095	37.314
		0.28888	2.50606	1.98681	1.6467	2.04652	24.5583		0.28888	6.90455	8.39296	6.3677	7.22174	3.61087	43.3304
		0.3611	2.48905	2.31754	1.95998	2.25552	27.0663		0.3611	7.59501	9.99167	7.6572	8.41463	4.20731	50.4878
		0.43332	2.37995	2.44734	1.84012	2.22247	26.6696		0.43332	8.74743	11.541	8.6946	9.66102	4.83051	57.9661
		0.50554	2.58208	2.73822	2.26495	2.52842	30.341		0.50554	9.56704	13.0047	9.892	10.8213	5.41063	64.9275
		0.57776	2.97548	3.29636	2.53045	2.9341	35.2092		0.57776	10.9811	14.2092	10.7106	11.967	5.98348	71.8017
		0.64998	3.32096	3.66072	2.58915	3.19028	38.2833		0.64998	11.9072	15.1496	12.2381	13.0983	6.54916	78.5899
		0.7222	3.60422	4.21134	3.03651	3.61736	43.4083		0.7222	12.6148	14.8401	13.1789	13.5446	6.7723	81.2676
		0.79443	4.16104	4.84168	3.57445	4.19239	50.3087		0.79443	12.6931	14.0767	13.8852	13.5517	6.77583	81.31
		0.86665	4.92681	5.18227	3.80472	4.63793	55.6552		0.86665	12.6529	12.7058	14.1024	13.1537	6.57684	78.9221
		0.93887	4.93048	5.06219	4.06094	4.68454	56.2144		0.93887	11.8264	10.9172	13.1579	11.9672	5.9836	71.8031
		1.01109	4.84238	4.77857	4.31434	4.6451	55.7412		1.01109	10.544	9.34335	11.8465	10.5779	5.28897	63.4677
		1.08331	4.75805	4.47046	3.67485	4.30112	51.6134		1.08331	8.34399	8.08628	9.282	8.57076	4.28538	51.4245
		1.15553	4.1156	3.90116	3.52417	3.84698	46.1637		1.15553	7.1685	7.02343	7.9521	7.38134	3.69067	44.2881
		1.22775	3.81262	3.59452	3.07281	3.49332	41.9198		1.22775	6.77786	6.41907	6.7125	6.63648	3.31824	39.8189
		1.29997	3.3297	3.36282	3.18329	3.29194	39.5032		1.29997	6.15589	6.2953	6.1974	6.2162	3.1081	37.2972
		1.37219	3.31865	3.26977	3.07955	3.22266	38.6719		1.37219	6.15539	6.14512	6.1951	6.1652	3.0826	36.9912
		1.44441	3.16485	3.19139	3.145	3.16708	38.005		1.44441	5.79519	6.26804	6.275	6.11274	3.05637	36.6765
		1.51663	3.39915	3.41074	3.30002	3.36997	40.4396		1.51663	6.1945	6.3219	6.7489	6.42177	3.21088	38.5306
		1.58885	3.73356	3.66712	3.50443	3.63504	43.6204		1.58885	6.95977	6.8858	7.5032	7.11626	3.55813	42.6975
		1.66107	4.45372	3.7873	3.81592	4.01898	48.2278		1.66107	8.34288	8.14901	9.0234	8.5051	4.25255	51.0306
		1.73329	4.67797	4.17133	4.35858	4.40263	52.8315		1.73329	9.96053	9.62301	10.7714	10.1183	5.05916	60.7099
		1.80551	4.78945	4.59347	4.5201	4.63434	55.6121		1.80551	11.9211	10.7389	12.6558	11.7719	5.88597	70.6316
		1.87773	4.07988	4.62214	4.18281	4.29494	51.5393		1.87773	12.6505	11.991	14.4796	13.0404	6.52018	78.2422
		1.94995	3.18786	4.54453	3.60308	3.77849	45.3419		1.94995	12.5651	13.4453	15.044	13.6848	6.8424	82.1088
		2.02217	2.6341	4.13808	2.9858	3.25266	39.0319		2.02217	12.1639	14.2619	15.0596	13.8285	6.91423	82.9708
		2.09439	2.35508	3.36996	2.75962	2.82822	33.9386		2.09439	12.0362	14.6685	14.8548	13.8532	6.92658	83.1189
		2.16661	2.22745	3.13903	3.06911	2.81186	33.7424		2.16661	10.9262	14.2032	14.0588	13.0627	6.53136	78.3763
		2.23884	2.16843	2.74104	2.72902	2.54616	30.554		2.23884	9.93476	13.2581	12.063	11.7519	5.87597	70.5116
		2.31106	2.24642	2.58525	2.49753	2.44307	29.3168		2.31106	8.80327	11.223	10.0059	10.0107	5.00535	60.0642
		2.38328	2.1435	2.32987	2.29244	2.25527	27.0632		2.38328	7.57121	9.9704	8.2161	8.5859	4.29295	51.5154
		2.4555	1.9538	2.42612	2.40485	2.26159	27.1391		2.4555	6.48906	8.89489	7.2047	7.52955	3.76478	45.1773
		2.52772	1.85167	2.46817	2.33722	2.21902	26.6282		2.52772	5.35948	7.67326	5.7992	6.27731	3.13866	37.6639
		2.59994	1.89429	2.41681	2.13932	2.15014	25.8017		2.59994	4.79601	7.15326	5.0009	5.65006	2.82503	33.9003
		2.67216	1.86522	2.15733	2.05926	2.02727	24.3272		2.67216	4.35971	6.59362	4.7271	5.22681	2.6134	31.3609
		2.74438	1.73375	2.06327	1.96787	1.92163	23.0596		2.74438	4.21997	6.13983	4.4236	4.9278	2.4639	29.5668
		2.8166	1.7066	2.08636	1.85056	1.88117	22.5741		2.8166	4.63446	6.44668	4.4162	5.16578	2.58289	30.9947
		2.88882	1.53685	1.88593	1.78339	1.73539	20.8247		2.88882	5.13167	6.58461	4.3059	5.34073	2.67036	32.0444

## Sheet: Figure 7D - source data
		Figure 7D - source data. Fluorescent intensity values for line trace measurements of ZF1::YFP::CDC-42; PAR-6::mKate (heat shock ZIF-1)
		cdc-42(xn65); par-6(cp60); xnEx551[hsp-16.41p::zif-1; t28h11.8p::CFP, pRF4] 092920
		image008
		red channel (par-6-mkate)	measurements				multiply to fit to y-axis		yfp channel (zf1::yfp::cdc-42)	measurements					multiply to fit to y-axis
		distance (microns)	m1	m2	m3	avg	*12		distance (microns)	m1	m2	m3	avg	normalize to red channel	*12
		-1.386	1.07869	0.912966	0.930316	0.973991	11.6879		0	0	0	0	0	0	0
		-1.32	1.21338	0.820368	0.762912	0.93222	11.1866		0.06602	0.0165753	0	0	0.0055251	0.00276255	0.0331506
		-1.254	1.04569	0.724074	0.950911	0.906892	10.8827		0.13204	0.016936	0	0	0.00564533	0.00282267	0.033872
		-1.188	1.09267	1.09075	1.14266	1.10869	13.3043		0.19806	0.0210822	0.055556	0.028864	0.0351674	0.0175837	0.211004
		-1.122	0.91036	0.851848	1.02156	0.927922	11.1351		0.26408	0.0135921	0.01111	0.019251	0.014651	0.00732552	0.0879062
		-1.056	0.93864	1.01111	0.925373	0.958376	11.5005		0.3301	0.0323689	0.055556	0.081153	0.0563593	0.0281797	0.338156
		-0.99	1.03096	0.999999	0.987252	1.00607	12.0728		0.39611	5.81e-05	0.038889	0.010174	0.0163737	0.00818685	0.0982422
		-0.924	1.14994	0.692589	0.978558	0.940362	11.2843		0.46213	0	0.005555	0	0.00185167	0.000925833	0.01111
		-0.858	0.91205	1.05001	1.48849	1.15018	13.8022		0.52815	0.0130301	0	0	0.00434337	0.00217168	0.0260602
		-0.792	0.74084	1.28148	1.69351	1.23861	14.8633		0.59417	0.024018	0	0.025872	0.01663	0.008315	0.09978
		-0.726	0.94135	1.19074	1.43798	1.19002	14.2803		0.66019	0.0404635	0.027778	0.059218	0.0424865	0.0212433	0.254919
		-0.66	1.09164	1.45371	1.53076	1.3587	16.3044		0.72621	0.0287147	0.005555	0.014905	0.0163916	0.00819578	0.0983494
		-0.594	1.46188	1.65	1.72639	1.61276	19.3531		0.79223	0.0719047	0.055556	0.064197	0.0638859	0.031943	0.383315
		-0.528	1.45841	1.4	1.73944	1.53262	18.3914		0.85825	0.022935	0.122223	0.153174	0.099444	0.049722	0.596664
		-0.462	1.29929	1.49259	1.56566	1.45251	17.4302		0.92427	0	0.022221	0.015935	0.0127187	0.00635933	0.076312
		-0.396	1.39119	1.3463	1.52636	1.42128	17.0554		0.99029	0	0	0	0	0	0
		-0.33	1.58699	1.16296	1.24352	1.33116	15.9739		1.05631	0.024021	0.027778	0.021794	0.024531	0.0122655	0.147186
		-0.264	1.31401	1.12407	1.00832	1.1488	13.7856		1.12232	0.0094903	0.005555	0.011535	0.0088601	0.00443005	0.0531606
		-0.198	1.34185	0.937035	0.985677	1.08819	13.0582		1.18834	0	0	0	0	0	0
		-0.132	1.29993	0.835184	0.919144	1.01809	12.217		1.25436	0	0	0	0	0	0
		-0.066	1.14912	0.840741	0.903362	0.964408	11.5729		1.32038	0	0	0	0	0	0
		0	1.27076	0.835185	0.959496	1.02181	12.2618		1.3864	0	0	0	0	0	0
		0.06602	1.31436	0.898149	0.868565	1.02702	12.3243		1.45242	0	0	0.021842	0.00728067	0.00364033	0.043684
		0.13204	1.22906	0.846296	0.863799	0.979718	11.7566		1.51844	0	0	0.011487	0.003829	0.0019145	0.022974
		0.19806	1.28272	1.02778	0.990194	1.10023	13.2028		1.58446	0	0	0	0	0	0
		0.26408	1.27192	1.03889	1.1393	1.15003	13.8004		1.65048	0	0	0	0	0	0
		0.3301	1.47909	0.811108	1.0891	1.12643	13.5172		1.7165	0.0240481	0	0	0.00801603	0.00400802	0.0480962
		0.39611	1.5223	1.07223	1.38133	1.32528	15.9034		1.78252	0.0641796	0	0	0.0213932	0.0106966	0.128359
		0.46213	1.48847	1.20741	1.19619	1.29736	15.5683		1.84853	0.0479504	0	0.025508	0.0244861	0.0122431	0.146917
		0.52815	1.77916	1.5463	1.32748	1.55098	18.6118		1.91455	0.0571119	0.111112	0.071819	0.0800143	0.0400071	0.480086
		0.59417	1.80599	1.28703	1.31145	1.46816	17.6179		1.98057	0.0203404	0.105555	0.062893	0.0629295	0.0314647	0.377577
		0.66019	1.54034	1.39815	1.28148	1.40666	16.8799		2.04659	0.0545349	0.1	0.070973	0.0751693	0.0375846	0.451016
		0.72621	1.52716	1.50741	1.6629	1.56582	18.7899		2.11261	0	0.062962	0.025585	0.0295157	0.0147578	0.177094
		0.79223	1.33865	1.63333	1.68034	1.55078	18.6093		2.17863	0	0.046296	0.091156	0.0458173	0.0229087	0.274904
		0.85825	1.39754	1.42407	1.46909	1.43023	17.1628		2.24465	0.0181314	0.035185	0.043215	0.0321771	0.0160886	0.193063
		0.92427	1.35338	1.22963	1.29333	1.29211	15.5054		2.31067	0.0153799	0.005555	0.009303	0.0100793	0.00503965	0.0604758
		0.99029	1.4462	1.57963	1.32703	1.45095	17.4114		2.37669	0	0.083334	0.097415	0.0602497	0.0301248	0.361498
		1.05631	1.24969	1.36852	1.45579	1.358	16.296		2.44271	0.0079217	0.072222	0.066158	0.0487672	0.0243836	0.292603
		1.12232	1.32971	1.1537	1.11202	1.19848	14.3817		2.50873	0.0255896	0.011111	0.002579	0.0130932	0.0065466	0.0785592
		1.18834	1.27685	1.15	1.08457	1.17047	14.0457		2.57474	0	0	0.023528	0.00784267	0.00392133	0.047056
		1.25436	1.12071	1.3037	1.03524	1.15322	13.8386		2.64076	0.0222519	0	0.032304	0.0181853	0.00909265	0.109112
		1.32038	0.95974	1.35185	1.31217	1.20792	14.495		2.70678	0.0112567	0.027778	0.068769	0.0359346	0.0179673	0.215607
		1.3864	1.03291	1.48518	1.44628	1.32146	15.8575		2.7728	0	0.033333	0.11688	0.050071	0.0250355	0.300426
		1.45242	1.11646	1.68704	1.4971	1.43353	17.2024		2.83882	0	0.005556	0.025154	0.0102367	0.00511833	0.06142
		image011
		red channel (par-6-mkate)	measurements				multiply to fit to y-axis		yfp channel (zf1::yfp::cdc-42)	measurements					multiply to fit to y-axis
		distance (microns)	m1	m2	m3	avg	*12		distance (microns)	m1	m2	m3	avg	normalize to red channel	*12
		0	2.62717	2.32015	3.36225	2.76986	33.2383		0	0.036612	0.098797	0.026599	0.0540027	0.0270013	0.324016
		0.06602	2.37769	2.40158	3.03078	2.60335	31.2402		0.06602	0.013664	0.066322	0.059794	0.0465933	0.0232967	0.27956
		0.13204	2.67188	2.577	3.10078	2.78322	33.3986		0.13204	0.028855	0.068994	0.062746	0.0535317	0.0267658	0.32119
		0.19806	2.89082	3.06872	2.79346	2.91767	35.012		0.19806	0.050255	0.044611	0.099989	0.0649517	0.0324758	0.38971
		0.26408	2.94535	3.07681	2.88342	2.96853	35.6223		0.26408	0.063667	0.082621	0.133528	0.093272	0.046636	0.559632
		0.3301	2.9186	3.00339	2.53038	2.81746	33.8095		0.3301	0.089138	0.075616	0.152424	0.105726	0.052863	0.634356
		0.39611	2.9647	2.76005	2.45632	2.72702	32.7243		0.39611	0.194903	0.125782	0.064293	0.128326	0.064163	0.769956
		0.46213	3.28325	3.41512	2.63751	3.11196	37.3435		0.46213	0.207	0.130495	0.141116	0.159537	0.0797685	0.957222
		0.52815	3.2683	2.95835	2.72742	2.98469	35.8163		0.52815	0.406806	0.10326	0.068543	0.19287	0.0964348	1.15722
		0.59417	3.18788	3.23868	2.78789	3.07148	36.8578		0.59417	0.337598	0.179389	0.131116	0.216034	0.108017	1.29621
		0.66019	3.26211	2.84394	2.58438	2.89681	34.7617		0.66019	0.343665	0.064585	0.059727	0.155992	0.0779962	0.935954
		0.72621	3.60982	3.02577	2.68507	3.10689	37.2826		0.72621	0.305956	0.166274	0.077019	0.183083	0.0915415	1.0985
		0.79223	4.08114	3.22874	2.86873	3.39287	40.7144		0.79223	0.324803	0.203806	0.236108	0.254906	0.127453	1.52943
		0.85825	3.67503	3.09661	2.95582	3.24249	38.9098		0.85825	0.23882	0.133674	0.165938	0.179477	0.0897387	1.07686
		0.92427	3.40562	3.59805	3.21376	3.40581	40.8697		0.92427	0.146081	0.267271	0.330392	0.247915	0.123957	1.48749
		0.99029	3.31285	3.10406	3.7035	3.37347	40.4816		0.99029	0.087119	0.240981	0.23626	0.18812	0.09406	1.12872
		1.05631	3.38237	3.31513	3.43537	3.37762	40.5315		1.05631	0.083642	0.123819	0.185785	0.131082	0.065541	0.786492
		1.12232	2.99021	3.49535	3.24562	3.24373	38.9247		1.12232	0.009523	0.209791	0.242185	0.153833	0.0769165	0.922998
		1.18834	2.75031	3.08951	3.21195	3.01726	36.2071		1.18834	0.027938	0.066967	0.203727	0.099544	0.049772	0.597264
		1.25436	2.56479	2.66452	2.87517	2.70149	32.4179		1.25436	0.042273	0.015808	0.186627	0.0815693	0.0407847	0.489416
		1.32038	2.46013	2.72416	3.13431	2.77287	33.2744		1.32038	0.061283	0.058023	0.111084	0.0767967	0.0383983	0.46078
		1.3864	2.48276	2.31896	2.85434	2.55202	30.6242		1.3864	0.058134	0.01318	0.105337	0.0588837	0.0294418	0.353302
		1.45242	2.62051	2.67474	2.8213	2.70552	32.4662		1.45242	0.007588	0.031139	0.020471	0.0197327	0.00986633	0.118396
		1.51844	2.54258	2.91011	3.15679	2.86983	34.4379		1.51844	0.025605	0.059308	0.020443	0.0351187	0.0175593	0.210712
		1.58446	2.76592	3.11584	3.15092	3.01089	36.1307		1.58446	0.012293	0.033717	0.125681	0.0572303	0.0286152	0.343382
		1.65048	3.22642	2.95653	3.36023	3.18106	38.1727		1.65048	0.140095	0.201365	0.011514	0.117658	0.058829	0.705948
		1.7165	3.72878	3.41814	3.84671	3.66454	43.9745		1.7165	0.148793	0.127105	0.100054	0.125317	0.0626587	0.751904
		1.78252	3.77826	3.80909	3.95686	3.84807	46.1768		1.78252	0.10045	0.068596	0.212174	0.127073	0.0635367	0.76244
		1.84853	3.99835	4.21751	3.84498	4.02028	48.2434		1.84853	0.18574	0.012118	0.14653	0.114796	0.057398	0.688776
		1.91455	4.38338	4.00996	4.07297	4.15544	49.8652		1.91455	0.281445	0.208474	0.239168	0.243029	0.121515	1.45817
		1.98057	4.37027	4.34607	4.08865	4.26833	51.22		1.98057	0.258694	0.157713	0.236882	0.217763	0.108882	1.30658
		2.04659	4.42531	3.89862	4.19109	4.17167	50.0601		2.04659	0.482495	0.123002	0.120351	0.241949	0.120975	1.4517
		2.11261	4.34244	3.51401	3.359	3.73848	44.8618		2.11261	0.554532	0.265475	0.191997	0.337335	0.168667	2.02401
		2.17863	4.0532	3.07255	3.19075	3.43883	41.266		2.17863	0.414675	0.186419	0.183628	0.261574	0.130787	1.56944
		2.24465	3.8609	3.64458	3.18466	3.56338	42.7606		2.24465	0.19056	0.245433	0.218778	0.218257	0.109129	1.30954
		2.31067	3.84452	3.74656	2.98592	3.52567	42.308		2.31067	0.094791	0.202277	0.190761	0.16261	0.0813048	0.975658
		2.37669	3.74065	3.53055	3.37313	3.54811	42.5773		2.37669	0.212139	0.15731	0.070425	0.146625	0.0733123	0.879748
		2.44271	3.91978	3.41817	3.04845	3.46213	41.5456		2.44271	0.217135	0.203502	0.058842	0.159826	0.0799132	0.958958
		2.50873	3.63576	3.67747	3.06094	3.45806	41.4967		2.50873	0.129378	0.19887	0.084292	0.137513	0.0687567	0.82508
		2.57474	3.63039	3.25349	2.97704	3.28697	39.4437		2.57474	0.106713	0.178672	0.048795	0.111393	0.0556967	0.66836
		2.64076	3.88974	3.37067	2.87616	3.37886	40.5463		2.64076	0.153575	0.36433	0.036899	0.184935	0.0924673	1.10961
		2.70678	3.94791	3.21827	2.81853	3.32824	39.9388		2.70678	0.144589	0.149787	0.050609	0.114995	0.0574975	0.68997
		2.7728	3.89273	2.88987	2.59236	3.12499	37.4998		2.7728	0.035763	0.231093	0.046266	0.104374	0.052187	0.626244
		2.83882	3.70811	2.38034	2.02263	2.70369	32.4443		2.83882	0	0.138675	0.05407	0.0642483	0.0321242	0.38549
		image015
		red channel (par-6-mkate)	measurements				multiply to fit to y-axis		yfp channel (zf1::yfp::cdc-42)	measurements					multiply to fit to y-axis
		distance (microns)	m1	m2	m3	avg	*12		distance (microns)	m1	m2	m3	avg	normalize to red channel	*12
		0	0.762595	0.943236	1.43015	1.04533	12.5439		0	0	0	0	0	0	0
		0.06602	1.09616	1.07723	1.17047	1.11462	13.3754		0.06602	0	0	0	0	0	0
		0.13204	1.08896	0.93431	1.30765	1.11031	13.3237		0.13204	0	0	0	0	0	0
		0.19806	0.754878	0.976405	1.23865	0.989977	11.8797		0.19806	0	0	0	0	0	0
		0.26408	1.00551	1.07828	1.28581	1.1232	13.4784		0.26408	0	0	0	0	0	0
		0.3301	0.817999	1.05597	1.50989	1.12795	13.5354		0.3301	0	0	0	0	0	0
		0.39611	0.845122	1.10694	1.59664	1.1829	14.1948		0.39611	0	0.0057311	0	0.00191037	0.000955183	0.0114622
		0.46213	0.932426	0.982144	1.90043	1.27167	15.26		0.46213	0	0.0303772	0	0.0101257	0.00506287	0.0607544
		0.52815	1.09102	1.02665	1.7672	1.29496	15.5395		0.52815	0	0	0	0	0	0
		0.59417	1.26186	1.22037	1.6972	1.39314	16.7177		0.59417	0	0	0	0	0	0
		0.66019	1.33997	1.55058	1.72814	1.53956	18.4748		0.66019	7.96e-05	0	0	2.65333e-05	1.32667e-05	0.0001592
		0.72621	1.31022	1.71304	1.84163	1.62163	19.4596		0.72621	0.0306446	0	0	0.0102149	0.00510743	0.0612892
		0.79223	1.3853	1.44998	1.79183	1.54237	18.5084		0.79223	0.0016647	0	0	0.0005549	0.00027745	0.0033294
		0.85825	1.38103	1.69628	1.55231	1.5432	18.5185		0.85825	0	0	0	0	0	0
		0.92427	1.27574	1.74719	1.35408	1.459	17.5081		0.92427	0	0	0	0	0	0
		0.99029	1.08224	1.44646	1.4212	1.31663	15.7996		0.99029	0	0	0	0	0	0
		1.05631	0.933263	1.31787	1.57358	1.2749	15.2989		1.05631	0	0	0	0	0	0
		1.12232	0.815583	1.25694	1.48417	1.18556	14.2268		1.12232	0	0	0	0	0	0
		1.18834	0.746319	1.23488	1.3776	1.1196	13.4352		1.18834	0	0	0	0	0	0
		1.25436	0.678266	1.07224	1.349	1.03317	12.398		1.25436	0	0	0	0	0	0
		1.32038	0.678138	1.13895	1.27076	1.02928	12.3514		1.32038	0	0	0	0	0	0
		1.3864	0.658876	1.17598	1.07217	0.969009	11.6281		1.3864	0	0	0	0	0	0
		1.45242	0.673903	1.0824	1.15091	0.969072	11.6289		1.45242	0	0	0	0	0	0
		1.51844	0.503485	1.16884	1.17567	0.949332	11.392		1.51844	0	0	0	0	0	0
		1.58446	0.713403	1.08001	1.31585	1.03642	12.437		1.58446	0	0	0	0	0	0
		1.65048	0.923684	1.05464	1.37019	1.11617	13.3941		1.65048	0	0	0	0	0	0
		1.7165	0.920519	1.31169	1.40244	1.21155	14.5386		1.7165	0	0	0	0	0	0
		1.78252	1.18884	1.50925	1.51583	1.40464	16.8557		1.78252	0	0	0	0	0	0
		1.84853	1.1683	1.81989	1.49002	1.49274	17.9128		1.84853	0	0	0	0	0	0
		1.91455	1.18682	1.56283	1.54921	1.43295	17.1954		1.91455	0	0	0	0	0	0
		1.98057	1.44026	1.54659	1.48327	1.49004	17.8805		1.98057	0	0	0	0	0	0
		2.04659	1.32221	1.84736	1.57147	1.58035	18.9642		2.04659	0	0	0	0	0	0
		2.11261	1.27828	1.49058	1.59907	1.45597	17.4717		2.11261	0	0	0	0	0	0
		2.17863	1.1639	1.47036	1.53827	1.39084	16.6901		2.17863	0	0	0	0	0	0
		2.24465	1.09897	1.60248	1.59431	1.43192	17.1831		2.24465	0	0	0	0	0	0
		2.31067	1.1805	1.49527	1.33529	1.33702	16.0442		2.31067	0	0	0	0	0	0
		2.37669	1.00093	1.39705	1.37299	1.25699	15.0839		2.37669	0	0	0	0	0	0
		2.44271	0.897995	1.55448	1.5119	1.32146	15.8575		2.44271	0	0	0	0	0	0
		2.50873	0.931237	1.29251	1.21357	1.14577	13.7493		2.50873	0	0	0.0073185	0.0024395	0.00121975	0.014637
		2.57474	0.965969	1.22516	1.41193	1.20102	14.4122		2.57474	0	0	0.0041408	0.00138027	0.000690133	0.0082816
		2.64076	1.10065	1.49961	1.33186	1.31071	15.7285		2.64076	0	0	0	0	0	0
		2.70678	0.820195	1.40477	1.36076	1.19524	14.3429		2.70678	0	0	0.0264226	0.00880753	0.00440377	0.0528452
		2.7728	0.894735	1.23384	1.52557	1.21805	14.6166		2.7728	0.0213021	0	0.0064019	0.00923467	0.00461733	0.055408
		2.83882	0.876412	1.18703	1.26023	1.10789	13.2947		2.83882	0.02018	0	0	0.00672667	0.00336333	0.04036
		image018
		red channel (par-6-mkate)	measurements				multiply to fit to y-axis		yfp channel (zf1::yfp::cdc-42)	measurements					multiply to fit to y-axis
		distance (microns)	m1	m2	m3	avg	*12		distance (microns)	m1	m2	m3	avg	normalize to red channel	*12
		0	1.03394	0.5826	0.93604	0.85086	10.2103		0	0.0252003	0	0	0.0084001	0.00420005	0.0504006
		0.06602	1.23813	0.72854	1.06182	1.0095	12.114		0.06602	0	0	0	0	0	0
		0.13204	1.14015	0.69159	1.26062	1.03079	12.3694		0.13204	0	0	0	0	0	0
		0.19806	0.86671	0.84995	1.19855	0.971737	11.6608		0.19806	0	0	0	0	0	0
		0.26408	1.24264	0.83851	1.15427	1.07847	12.9417		0.26408	0	0	0	0	0	0
		0.3301	1.2457	0.93046	1.00447	1.06021	12.7225		0.3301	0	0	0	0	0	0
		0.39611	1.75106	1.02072	1.14605	1.30594	15.6713		0.39611	0	0	0	0	0	0
		0.46213	1.9327	0.94482	1.40422	1.42725	17.127		0.46213	0	0	0	0	0	0
		0.52815	1.87164	1.08744	1.30324	1.42077	17.0493		0.52815	0	0	0	0	0	0
		0.59417	1.7939	1.43193	1.50877	1.5782	18.9384		0.59417	0	0.0003863	0	0.000128767	6.43833e-05	0.0007726
		0.66019	1.86157	1.4599	1.77543	1.69897	20.3876		0.66019	0	0.0335196	0.0038736	0.0124644	0.0062322	0.0747864
		0.72621	1.99057	1.42015	1.77213	1.72762	20.7314		0.72621	0	0.0014531	0.0303422	0.0105984	0.00529922	0.0635906
		0.79223	2.2921	1.52133	1.74495	1.85279	22.2335		0.79223	0	0	0	0	0	0
		0.85825	2.10618	1.66965	1.99914	1.92499	23.0999		0.85825	0	0	0	0	0	0
		0.92427	2.0613	1.66199	2.12668	1.94999	23.3999		0.92427	0	0	0	0	0	0
		0.99029	2.2772	1.68037	1.88666	1.94808	23.3769		0.99029	0	0	0	0	0	0
		1.05631	2.32933	1.24291	1.76328	1.77851	21.3421		1.05631	0	0	0	0	0	0
		1.12232	1.8828	1.31384	1.54017	1.57894	18.9472		1.12232	0	0	0	0	0	0
		1.18834	1.82887	1.25184	1.63692	1.57254	18.8705		1.18834	0	0	0	0	0	0
		1.25436	1.66587	1.01671	1.55645	1.41301	16.9561		1.25436	0	0	0	0	0	0
		1.32038	1.70825	1.00485	1.46353	1.39221	16.7065		1.32038	0	0	0	0	0	0
		1.3864	1.59573	1.05894	1.28226	1.31231	15.7477		1.3864	0	0	0	0	0	0
		1.45242	1.8287	0.99674	1.45491	1.42678	17.1214		1.45242	0	0	0	0	0	0
		1.51844	2.20973	1.27767	1.41932	1.63557	19.6269		1.51844	0.0076244	0	0	0.00254147	0.00127073	0.0152488
		1.58446	1.92441	1.2582	1.41185	1.53149	18.3778		1.58446	0.0345869	0	0	0.011529	0.00576448	0.0691738
		1.65048	2.19529	1.22595	1.65118	1.69081	20.2897		1.65048	0.02473	0	0	0.00824333	0.00412167	0.04946
		1.7165	2.66543	1.23885	1.65688	1.85372	22.2446		1.7165	0	0	0	0	0	0
		1.78252	2.26965	1.38665	1.68426	1.78019	21.3622		1.78252	0	0	0	0	0	0
		1.84853	2.61448	1.7356	1.88384	2.07797	24.9357		1.84853	0	0	0.0179183	0.00597277	0.00298638	0.0358366
		1.91455	3.02085	1.62589	1.94612	2.19762	26.3714		1.91455	0	0	0.0152642	0.00508807	0.00254403	0.0305284
		1.98057	2.49046	1.69061	2.006	2.06236	24.7483		1.98057	0	0	0	0	0	0
		2.04659	2.28713	1.94313	1.80758	2.01261	24.1514		2.04659	0	0	0	0	0	0
		2.11261	2.36826	2.00484	1.70773	2.02694	24.3233		2.11261	0	0	0	0	0	0
		2.17863	2.19953	1.7578	1.75789	1.90507	22.8609		2.17863	0	0	0	0	0	0
		2.24465	2.02233	1.59127	1.54209	1.71856	20.6228		2.24465	0	0	0	0	0	0
		2.31067	1.84493	1.91512	1.47278	1.74428	20.9313		2.31067	0	0	0	0	0	0
		2.37669	2.06967	1.69081	1.22197	1.66082	19.9298		2.37669	0	0	0	0	0	0
		2.44271	2.25755	1.59248	1.00115	1.61706	19.4047		2.44271	0	0	0	0	0	0
		2.50873	1.98987	1.60061	0.91934	1.50327	18.0393		2.50873	0	0	0	0	0	0
		2.57474	1.93924	1.27128	0.84984	1.35345	16.2414		2.57474	0	0	0	0	0	0
		2.64076	1.72703	1.05539	0.83148	1.20463	14.4556		2.64076	0	0	0	0	0	0
		2.70678	1.77915	0.86971	0.75577	1.13488	13.6185		2.70678	0	0	0	0	0	0
		2.7728	1.63346	0.85414	0.8916	1.1264	13.5168		2.7728	0	0	0	0	0	0
		2.83882	1.82131	0.64276	1.07016	1.17808	14.1369		2.83882	0	0	0	0	0	0
		image016
		red channel (par-6-mkate)	measurements				multiply to fit to y-axis		yfp channel (zf1::yfp::cdc-42)	measurements					multiply to fit to y-axis
		distance (microns)	m1	m2	m3	avg	*12		distance (microns)	m1	m2	m3	avg	normalize to red channel	*12
		0	2.18293	1.42092	1.69102	1.76496	21.1795		0	0	0	0	0	0	0
		0.06602	2.44276	1.40081	1.85243	1.89867	22.784		0.06602	0	0	0	0	0	0
		0.13204	2.36712	1.51635	1.84302	1.90883	22.906		0.13204	0	0	0	0	0	0
		0.19806	2.48767	1.71713	1.87044	2.02508	24.301		0.19806	0	0	0	0	0	0
		0.26408	2.57091	2.09724	1.95422	2.20746	26.4895		0.26408	0	0	0	0	0	0
		0.3301	2.84744	1.99972	2.06937	2.30551	27.6661		0.3301	0	0	0	0	0	0
		0.39611	3.10942	1.87445	2.15955	2.38114	28.5737		0.39611	0	0	0.0138969	0.0046323	0.00231615	0.0277938
		0.46213	2.97196	2.47977	2.01279	2.48817	29.8581		0.46213	0	0.0082914	0.0190773	0.0091229	0.00456145	0.0547374
		0.52815	2.95336	2.42983	2.25563	2.54627	30.5553		0.52815	0.0310634	0.0286848	0	0.0199161	0.00995803	0.119496
		0.59417	3.18226	2.46271	2.80776	2.81758	33.8109		0.59417	0.0354367	0.0620737	0	0.0325035	0.0162517	0.195021
		0.66019	2.94882	2.65059	2.88842	2.82928	33.9513		0.66019	0	0.0246631	0.0266849	0.017116	0.008558	0.102696
		0.72621	3.39781	3.01623	3.32587	3.24664	38.9596		0.72621	0	0.0453515	0.0903398	0.0452304	0.0226152	0.271383
		0.79223	3.77408	3.12771	3.30213	3.40131	40.8157		0.79223	0.0278058	0.0006047	0.0940248	0.0408118	0.0204059	0.244871
		0.85825	3.91657	3.26774	3.55729	3.58053	42.9664		0.85825	0.0654424	0.040014	0.0822446	0.062567	0.0312835	0.375402
		0.92427	4.44807	3.11835	3.5081	3.69151	44.2981		0.92427	0.0067237	0.0265811	0.0036036	0.0123028	0.0061514	0.0738168
		0.99029	4.15477	3.17219	3.29377	3.54024	42.4829		0.99029	0.0271574	0	0	0.00905247	0.00452623	0.0543148
		1.05631	3.78566	3.02339	3.22681	3.34529	40.1434		1.05631	0.0060159	0	0	0.0020053	0.00100265	0.0120318
		1.12232	3.48509	3.07437	2.6099	3.05645	36.6774		1.12232	0	0	0	0	0	0
		1.18834	3.32106	2.6261	2.92595	2.9577	35.4924		1.18834	0	0	0	0	0	0
		1.25436	2.9046	2.71359	2.8146	2.81093	33.7312		1.25436	0	0.001885	0	0.000628333	0.000314167	0.00377
		1.32038	2.88124	2.57146	2.82302	2.75857	33.1029		1.32038	0	0.0336639	0	0.0112213	0.00561065	0.0673278
		1.3864	2.48571	2.63919	2.59149	2.57213	30.8656		1.3864	0	0.0536815	0	0.0178938	0.00894692	0.107363
		1.45242	2.53033	2.71554	2.5969	2.61426	31.3711		1.45242	0	0.0812495	0	0.0270832	0.0135416	0.162499
		1.51844	2.89233	2.61423	2.56136	2.68931	32.2717		1.51844	0	0.0313746	0	0.0104582	0.0052291	0.0627492
		1.58446	2.9045	2.30171	3.07533	2.76051	33.1262		1.58446	0	4.4e-06	0	1.46667e-06	7.33333e-07	8.8e-06
		1.65048	3.00185	2.35635	3.12139	2.82653	33.9184		1.65048	0	0	0	0	0	0
		1.7165	3.29815	2.76858	3.03546	3.03406	36.4088		1.7165	0.0070502	0	0.0001294	0.0023932	0.0011966	0.0143592
		1.78252	3.50066	3.37426	3.47818	3.45103	41.4124		1.78252	0.0261241	0	0.0375106	0.0212116	0.0106058	0.127269
		1.84853	3.63985	3.4334	3.71077	3.59467	43.1361		1.84853	0	0	0.0680824	0.0226941	0.0113471	0.136165
		1.91455	3.95037	3.65787	3.93825	3.84883	46.186		1.91455	0	0	0.0633016	0.0211005	0.0105503	0.126603
		1.98057	3.99127	3.77179	4.34176	4.03494	48.4193		1.98057	7.07e-05	1.64e-05	0.0602161	0.0201011	0.0100505	0.120606
		2.04659	3.82859	3.77177	4.35828	3.98621	47.8346		2.04659	0.0305094	0.0292223	0.0646463	0.0414593	0.0207297	0.248756
		2.11261	3.42937	3.40695	4.04516	3.62716	43.5259		2.11261	0.0027964	0.0044978	0.0179042	0.00839947	0.00419973	0.0503968
		2.17863	2.91472	3.44751	3.54083	3.30102	39.6122		2.17863	0	0	0	0	0	0
		2.24465	2.59175	2.92462	3.12273	2.8797	34.5564		2.24465	0	0	0	0	0	0
		2.31067	2.32038	2.94761	3.07316	2.78038	33.3646		2.31067	0	0.0223512	0	0.0074504	0.0037252	0.0447024
		2.37669	2.43307	2.67987	3.09989	2.73761	32.8513		2.37669	0	0.0112397	0.0199294	0.0103897	0.00519485	0.0623382
		2.44271	2.11157	2.43632	2.65187	2.39992	28.799		2.44271	0	0	0.0154287	0.0051429	0.00257145	0.0308574
		2.50873	1.84852	2.45802	2.71915	2.3419	28.1028		2.50873	0	0	0.056899	0.0189663	0.00948317	0.113798
		2.57474	1.56477	2.36571	2.42641	2.11896	25.4276		2.57474	0	0	0.0396514	0.0132171	0.00660857	0.0793028
		2.64076	1.53367	2.48783	2.41964	2.14705	25.7646		2.64076	0	0	0	0	0	0
		2.70678	1.15891	2.23779	2.21679	1.87116	22.454		2.70678	0	0	0	0	0	0
		2.7728	1.0134	1.85317	2.09297	1.65318	19.8382		2.7728	0	0	0	0	0	0
		2.83882	0.92394	1.5276	2.24326	1.56493	18.7792		2.83882	0	0	0	0	0	0

## Sheet: Figure 7H - source data
		Figure 7H - source data. Fluorescent intensity values for line trace measurements of EXC-5::ZF1::mScarlet; GFP::PKC-3 (control)
		exc-5(xn108); pkc-3(it309); xnEx523[t28h11.8p::cfp, pRF4] B1 2nd replicate 022719
		image001
		red channel (exc-5-zf1-mscar)	measurements					multiply to fit to y-axis		green channel (gfp-pkc-3)	measurements				multiply to fit to y-axis
		distance (microns)	m1	m2	m3	avg	normalize to gfp	*7		distance (microns)	m1	m2	m3	avg	*7
		-1.404	0.09123	0.1015	0.069927	0.0875523	1.22573	8.58013		0	2.60485	2.469	1.38841	2.15409	15.0786
		-1.3455	0.04824	0.176162	0.150547	0.124983	1.74976	12.2483		0.05849	2.46445	2.38082	2.02852	2.29126	16.0388
		-1.287	0.03289	0.205071	0.162702	0.133554	1.86976	13.0883		0.11697	2.5228	2.42917	2.50124	2.4844	17.3908
		-1.2285	0.04657	0.110004	0.185485	0.11402	1.59628	11.1739		0.17546	2.73692	2.62173	2.51758	2.62541	18.3779
		-1.17	0.06037	0.171247	0.104047	0.111888	1.56643	10.965		0.23394	2.67167	2.75076	2.56027	2.6609	18.6263
		-1.1115	0.0889	0.243987	0.094556	0.142481	1.99473	13.9631		0.29243	2.66972	2.64863	2.34203	2.55346	17.8742
		-1.053	0.05688	0.225466	0.174434	0.15226	2.13164	14.9215		0.35092	2.86241	2.78091	2.48369	2.709	18.963
		-0.9945	0.09999	0.216774	0.321243	0.212669	2.97737	20.8416		0.4094	2.69303	2.76263	2.56963	2.6751	18.7257
		-0.936	0.11963	0.232884	0.306884	0.219799	3.07719	21.5403		0.46789	2.96249	2.85109	2.63456	2.81605	19.7123
		-0.8775	0.09559	0.3057	0.285558	0.228949	3.20529	22.437		0.52637	3.19366	3.30053	2.8877	3.1273	21.8911
		-0.819	0.10174	0.249489	0.288417	0.213215	2.98501	20.8951		0.58486	3.56327	4.01511	3.24169	3.60669	25.2468
		-0.7605	0.27958	0.258793	0.386883	0.308419	4.31786	30.225		0.64335	4.04214	4.34633	3.94341	4.11063	28.7744
		-0.702	0.2868	0.407487	0.55587	0.416719	5.83407	40.8385		0.70183	4.11029	4.87373	4.53241	4.50548	31.5383
		-0.6435	0.29028	0.57319	0.564858	0.476109	6.66553	46.6587		0.76032	4.56975	5.45617	5.69891	5.24161	36.6913
		-0.585	0.42443	0.564282	0.640493	0.543068	7.60296	53.2207		0.8188	5.24547	6.44307	7.37795	6.3555	44.4885
		-0.5265	0.62865	0.52935	0.859207	0.672402	9.41363	65.8954		0.87729	6.6531	7.62175	9.48938	7.92141	55.4499
		-0.468	0.68056	0.705547	0.893499	0.759869	10.6382	74.4671		0.93578	8.39709	9.85571	9.81544	9.35608	65.4926
		-0.4095	0.79858	0.85268	0.843654	0.831638	11.6429	81.5005		0.99426	10.2021	10.156	9.30012	9.88607	69.2025
		-0.351	0.53803	0.817312	0.696376	0.683906	9.57468	67.0228		1.05275	11.5259	10.0534	8.70095	10.0934	70.6538
		-0.2925	0.4399	0.743807	0.600694	0.5948	8.3272	58.2904		1.11123	9.96532	9.05908	6.73387	8.58609	60.1026
		-0.234	0.36791	0.407365	0.439939	0.405071	5.671	39.697		1.16972	8.24138	7.41617	5.78711	7.14822	50.0375
		-0.1755	0.20208	0.297133	0.387065	0.295426	4.13596	28.9517		1.22821	5.9899	6.19421	4.71938	5.6345	39.4415
		-0.117	0.27046	0.316415	0.425563	0.337479	4.72471	33.073		1.28669	4.65842	5.21609	4.15832	4.67761	32.7433
		-0.0585	0.2052	0.311914	0.274403	0.263839	3.69375	25.8562		1.34518	4.10111	4.51019	3.86454	4.15861	29.1103
		0	0.24323	0.31305	0.290189	0.282156	3.95019	27.6513		1.40366	3.88038	3.91798	3.73317	3.84384	26.9069
		0.05849	0.17726	0.373794	0.231159	0.260738	3.65033	25.5523		1.46215	4.09548	3.8078	3.63086	3.84471	26.913
		0.11697	0.27407	0.513355	0.241944	0.343123	4.80372	33.6261		1.52064	4.38082	4.03509	3.93177	4.11589	28.8113
		0.17546	0.41984	0.448675	0.213055	0.360523	5.04733	35.3313		1.57912	4.70812	4.46655	4.27908	4.48458	31.3921
		0.23394	0.55829	0.45894	0.438659	0.485296	6.79415	47.559		1.63761	5.7247	5.6605	4.70036	5.36185	37.533
		0.29243	0.6896	0.455562	0.58527	0.576811	8.07535	56.5274		1.69609	6.66993	6.99353	5.93374	6.5324	45.7268
		0.35092	0.83184	0.702075	0.805356	0.779757	10.9166	76.4162		1.75458	7.48096	7.93061	7.34596	7.58584	53.1009
		0.4094	0.95848	0.874954	1.01545	0.949628	13.2948	93.0636		1.81307	9.11905	8.40545	8.41066	8.64505	60.5154
		0.46789	1.29798	0.905427	0.974593	1.05933	14.8307	103.815		1.87155	10.0158	8.60345	8.76299	9.12741	63.8919
		0.52637	1.16736	0.824759	0.779848	0.923989	12.9358	90.5509		1.93004	10.8019	8.2947	8.42493	9.17384	64.2169
		0.58486	0.74999	0.742772	0.386319	0.62636	8.76904	61.3833		1.98852	10.0359	6.98282	6.89953	7.97274	55.8092
		0.64335	0.40398	0.727812	0.2398	0.457197	6.40076	44.8053		2.04701	8.92336	5.49953	5.92434	6.78241	47.4769
		0.70183	0.37386	0.550534	0.287561	0.403985	5.65579	39.5905		2.1055	7.72157	4.36758	5.30963	5.79959	40.5972
		0.76032	0.31075	0.508399	0.398281	0.40581	5.68134	39.7694		2.16398	5.85229	3.95307	4.46151	4.75562	33.2894
		0.8188	0.234	0.418873	0.318273	0.323715	4.53201	31.7241		2.22247	4.33778	3.76568	3.80634	3.96993	27.7895
		0.87729	0.18191	0.272105	0.274947	0.242987	3.40182	23.8128		2.28095	4.22096	3.10364	3.9839	3.7695	26.3865
		0.93578	0.22845	0.394268	0.294874	0.305864	4.2821	29.9747		2.33944	3.69316	2.83828	3.66683	3.39942	23.796
		0.99426	0.19991	0.413884	0.248728	0.287507	4.0251	28.1757		2.39793	3.78015	2.77741	3.35778	3.30511	23.1358
		1.05275	0.0901	0.268259	0.308378	0.222246	3.11144	21.7801		2.45641	3.58739	2.65728	3.3197	3.18812	22.3169
		1.11123	0.05997	0.257853	0.251534	0.189786	2.657	18.599		2.5149	3.19816	2.65436	2.80864	2.88705	20.2094
		1.16972	0.07243	0.158624	0.186585	0.139213	1.94898	13.6429		2.57338	2.93229	2.71862	2.7439	2.79827	19.5879
		1.22821	0.04964	0.130063	0.094327	0.0913433	1.27881	8.95165		2.63187	2.63955	2.60282	2.94353	2.72863	19.1004
		1.28669	0.00761	0.195864	0.173087	0.12552	1.75728	12.301		2.69036	2.56207	2.5042	2.81607	2.62745	18.3921
		1.34518	0	0.180185	0.134379	0.104855	1.46797	10.2758		2.74884	2.16261	2.36672	2.6933	2.40754	16.8528
		1.40366	0.01035	0.147119	0.101891	0.0864533	1.21035	8.47243		2.80733	2.03723	2.17414	2.69128	2.30088	16.1062
		image004
		red channel (exc-5-zf1-mscar)	measurements					multiply to fit to y-axis		green channel (gfp-pkc-3)	measurements				multiply to fit to y-axis
		distance (microns)	m1	m2	m3	avg	normalize to gfp	*7		distance (microns)	m1	m2	m3	avg	*7
		0	0	0	0	0	0	0		0	1.51176	2.01059	2.07841	1.86692	13.0684
		0.05849	0	0	0	0	0	0		0.05849	1.795	1.86414	1.8524	1.83718	12.8603
		0.11697	0	0	0	0	0	0		0.11697	1.79019	1.69444	1.89898	1.79454	12.5618
		0.17546	0	0	0	0	0	0		0.17546	2.0447	1.77894	2.0333	1.95231	13.6662
		0.23394	0	0	0	0	0	0		0.23394	2.53414	2.29445	1.86665	2.23175	15.6222
		0.29243	0	0	0	0	0	0		0.29243	2.08492	2.16268	1.497	1.91487	13.4041
		0.35092	0	0	0	0	0	0		0.35092	2.21425	2.12138	2.11221	2.14928	15.045
		0.4094	0.00595	0	0	0.00198333	0.0277667	0.194367		0.4094	2.50887	2.27947	2.20865	2.33233	16.3263
		0.46789	0.03797	0.01281	0.01843	0.02307	0.32298	2.26086		0.46789	3.19384	2.81719	2.33921	2.78341	19.4839
		0.52637	0.08187	0.04221	0.01488	0.04632	0.64848	4.53936		0.52637	2.9079	3.0498	2.96688	2.97486	20.824
		0.58486	0.10881	0.07801	0.03469	0.0738367	1.03371	7.23599		0.58486	3.28274	3.16054	3.36761	3.2703	22.8921
		0.64335	0.00842	0.05213	0.07822	0.0462567	0.647593	4.53315		0.64335	3.78393	3.2142	4.15418	3.71744	26.0221
		0.70183	0.05487	0.0246	0.09322	0.0575633	0.805887	5.64121		0.70183	3.95742	4.08731	4.12	4.05491	28.3844
		0.76032	0.27668	0.04604	0.08497	0.135897	1.90255	13.3179		0.76032	3.93262	4.21025	4.04539	4.06275	28.4393
		0.8188	0.38721	0.14954	0.19413	0.243627	3.41077	23.8754		0.8188	4.40699	4.22817	4.7274	4.45419	31.1793
		0.87729	0.30414	0.21645	0.27075	0.26378	3.69292	25.8504		0.87729	4.16732	4.46556	5.67408	4.76899	33.3829
		0.93578	0.32165	0.4275	0.35342	0.367523	5.14533	36.0173		0.93578	4.55168	4.25275	6.5965	5.13364	35.9355
		0.99426	0.67134	0.55839	0.50141	0.577047	8.07865	56.5506		0.99426	6.75117	5.29356	7.72581	6.59018	46.1313
		1.05275	0.86767	0.76849	0.61524	0.750467	10.5065	73.5457		1.05275	8.86667	7.4151	9.535	8.60559	60.2391
		1.11123	1.08853	1.1008	0.89092	1.02675	14.3745	100.622		1.11123	7.96323	10.2723	10.1479	9.46115	66.228
		1.16972	0.93918	0.87487	0.49113	0.768393	10.7575	75.3025		1.16972	6.96874	10.8585	9.25068	9.02598	63.1819
		1.22821	0.86711	0.722	0.41601	0.668373	9.35723	65.5006		1.22821	6.36616	9.61309	7.68662	7.88862	55.2204
		1.28669	0.4575	0.69488	0.21921	0.457197	6.40075	44.8053		1.28669	6.16869	7.33684	5.81427	6.43993	45.0795
		1.34518	0.33709	0.36669	0.17523	0.293003	4.10205	28.7143		1.34518	5.98035	6.57212	5.12296	5.89181	41.2427
		1.40366	0.45618	0.28115	0.12486	0.287397	4.02355	28.1649		1.40366	6.54801	5.94542	5.47454	5.98932	41.9253
		1.46215	0.58711	0.33238	0.10154	0.340343	4.76481	33.3536		1.46215	7.39584	5.55728	5.95016	6.30109	44.1077
		1.52064	0.43014	0.50437	0.1741	0.369537	5.17351	36.2146		1.52064	8.2817	5.58009	7.33257	7.06479	49.4535
		1.57912	0.73235	0.60137	0.43445	0.58939	8.25146	57.7602		1.57912	9.7264	7.28339	9.06624	8.69201	60.8441
		1.63761	0.80069	1.07321	0.58875	0.820883	11.4924	80.4466		1.63761	9.67053	8.8602	10.4039	9.64486	67.514
		1.69609	0.77484	1.05836	1.03389	0.955697	13.3798	93.6583		1.69609	7.60332	9.94378	9.48543	9.01084	63.0759
		1.75458	1.01618	0.89226	0.85577	0.921403	12.8996	90.2975		1.75458	5.89732	9.33077	7.55219	7.59343	53.154
		1.81307	0.8267	0.97622	0.67844	0.82712	11.5797	81.0578		1.81307	5.20311	7.25464	5.58219	6.01331	42.0932
		1.87155	0.54571	0.58656	0.50925	0.547173	7.66043	53.623		1.87155	4.12945	5.43864	4.56782	4.71197	32.9838
		1.93004	0.38062	0.43798	0.60333	0.473977	6.63567	46.4497		1.93004	3.88056	5.0828	3.95946	4.30761	30.1532
		1.98852	0.22	0.53147	0.67314	0.47487	6.64818	46.5373		1.98852	3.85128	4.99458	3.57117	4.13901	28.9731
		2.04701	0.13735	0.25883	0.44045	0.278877	3.90427	27.3299		2.04701	3.82335	5.29656	3.80182	4.30724	30.1507
		2.1055	0.07208	0.20696	0.20782	0.162287	2.27201	15.9041		2.1055	2.90951	4.45518	2.7511	3.37193	23.6035
		2.16398	0.1321	0.19393	0.06348	0.129837	1.81771	12.724		2.16398	2.85334	4.28213	2.79137	3.30895	23.1626
		2.22247	0.09764	0.09424	0.03523	0.0757033	1.05985	7.41893		2.22247	2.77268	3.66824	2.75218	3.06437	21.4506
		2.28095	0.06637	0.06984	0.04228	0.0594967	0.832953	5.83067		2.28095	2.68001	3.81315	2.69448	3.06255	21.4378
		2.33944	0.0726	0.00272	0	0.0251067	0.351493	2.46045		2.33944	2.65691	3.63209	2.16403	2.81768	19.7237
		2.39793	0.09898	0.1767	0.00523	0.0936367	1.31091	9.17639		2.39793	2.34933	3.45226	2.41387	2.73849	19.1694
		2.45641	0.04383	0.04195	0.02988	0.0385533	0.539747	3.77823		2.45641	2.92612	3.31179	2.64294	2.96028	20.722
		2.5149	0.07629	0.0691	0.00565	0.0503467	0.704853	4.93397		2.5149	2.59558	3.11909	2.79615	2.83694	19.8586
		2.57338	0.0239	0.01022	0	0.0113733	0.159227	1.11459		2.57338	2.55985	2.3807	2.91603	2.61886	18.332
		2.63187	0.00326	0.01429	0	0.00585	0.0819	0.5733		2.63187	2.53348	2.58971	3.14703	2.75674	19.2972
		2.69036	0.03813	0.02377	0	0.0206333	0.288867	2.02207		2.69036	2.46647	2.61612	2.38298	2.48852	17.4197
		2.74884	0.04146	0	0	0.01382	0.19348	1.35436		2.74884	2.28358	2.26815	2.30819	2.28664	16.0065
		2.80733	0.00833	0	0	0.00277667	0.0388733	0.272113		2.80733	2.15761	2.1105	1.93213	2.06675	14.4672
		image009
		red channel (exc-5-zf1-mscar)	measurements					multiply to fit to y-axis		green channel (gfp-pkc-3)	measurements				multiply to fit to y-axis
		distance (microns)	m1	m2	m3	avg	normalize to gfp	*7		distance (microns)	m1	m2	m3	avg	*7
		0	0	0	0	0	0	0		0	3.53917	2.69708	3.64297	3.29307	23.0515
		0.05849	0	0	0.007665	0.002555	0.03577	0.25039		0.05849	3.87268	3.7438	3.59256	3.73635	26.1544
		0.11697	0	0	0.025589	0.00852967	0.119415	0.835907		0.11697	4.03113	4.85494	3.84716	4.24441	29.7109
		0.17546	0.011642	0	0	0.00388067	0.0543293	0.380305		0.17546	3.39692	4.65775	3.64222	3.89896	27.2927
		0.23394	0.036224	0	0	0.0120747	0.169045	1.18332		0.23394	4.08311	4.1526	3.52323	3.91965	27.4375
		0.29243	0.087966	0.004141	0	0.0307023	0.429833	3.00883		0.29243	4.01467	4.4413	3.25595	3.90397	27.3278
		0.35092	0.034076	0.02936	0	0.0211453	0.296035	2.07224		0.35092	4.04803	3.48319	2.76543	3.43222	24.0255
		0.4094	0.058783	0.065128	0	0.0413037	0.578251	4.04776		0.4094	4.04997	3.40821	3.07335	3.51051	24.5736
		0.46789	0.036732	0.035401	0.025025	0.032386	0.453404	3.17383		0.46789	3.5828	3.1389	3.48346	3.40172	23.812
		0.52637	0.118829	0.031412	0.034336	0.0615257	0.861359	6.02952		0.52637	3.68141	3.37684	3.45971	3.50599	24.5419
		0.58486	0.054396	0.002103	0.007121	0.0212067	0.296893	2.07825		0.58486	3.7213	3.42739	3.79967	3.64945	25.5462
		0.64335	0.024732	0.031164	0.010519	0.0221383	0.309937	2.16956		0.64335	4.06281	4.10642	3.66054	3.94326	27.6028
		0.70183	0.054789	0.060883	0.050458	0.0553767	0.775273	5.42691		0.70183	4.18135	4.28924	3.33527	3.93529	27.547
		0.76032	0.12868	0.144397	0.017539	0.096872	1.35621	9.49346		0.76032	4.33635	4.40512	3.71296	4.15148	29.0603
		0.8188	0.100178	0.077096	0.039994	0.0724227	1.01392	7.09742		0.8188	4.68684	4.74866	4.31021	4.5819	32.0733
		0.87729	0.125335	0.073389	0.088386	0.0957033	1.33985	9.37893		0.87729	6.47103	5.58299	4.98124	5.67842	39.7489
		0.93578	0.318262	0.226457	0.333024	0.292581	4.09613	28.6729		0.93578	6.18024	6.37098	6.51162	6.35428	44.48
		0.99426	0.536629	0.347225	0.505571	0.463142	6.48398	45.3879		0.99426	6.29152	6.38896	7.30327	6.66125	46.6287
		1.05275	0.464677	0.406477	0.6213	0.497485	6.96479	48.7535		1.05275	5.38119	5.04579	7.02954	5.81884	40.7319
		1.11123	0.264017	0.472804	0.469959	0.40226	5.63164	39.4215		1.11123	4.08245	3.62508	5.33621	4.34791	30.4354
		1.16972	0.171594	0.265073	0.396872	0.277846	3.88985	27.2289		1.16972	3.54611	2.51063	3.71239	3.25638	22.7946
		1.22821	0.162113	0.094803	0.19661	0.151175	2.11645	14.8152		1.22821	2.76323	2.12221	2.15627	2.34724	16.4307
		1.28669	0.084909	0.031543	0.135976	0.0841427	1.178	8.24598		1.28669	2.63489	1.53153	2.16057	2.109	14.763
		1.34518	0.038453	0.016291	0.009279	0.021341	0.298774	2.09142		1.34518	2.42874	1.66394	2.34532	2.146	15.022
		1.40366	0.000529	0.05616	0.099064	0.0519177	0.726847	5.08793		1.40366	2.35547	1.67437	2.25088	2.09357	14.655
		1.46215	0.086945	0.018187	0.154011	0.086381	1.20933	8.46534		1.46215	2.95765	1.87069	2.1335	2.32061	16.2443
		1.52064	0.109916	0.103891	0.074592	0.096133	1.34586	9.42103		1.52064	3.05719	1.99208	2.69437	2.58121	18.0685
		1.57912	0.145826	0.041475	0.097137	0.0948127	1.32738	9.29164		1.57912	3.46099	2.59395	3.00613	3.02036	21.1425
		1.63761	0.341211	0.145512	0.102745	0.196489	2.75085	19.256		1.63761	4.50229	4.40847	4.12126	4.34401	30.408
		1.69609	0.539799	0.264176	0.161128	0.321701	4.50381	31.5267		1.69609	5.82308	6.20629	5.81535	5.94824	41.6377
		1.75458	0.648403	0.56227	0.326557	0.51241	7.17374	50.2162		1.75458	6.07557	7.23929	6.74182	6.68556	46.7989
		1.81307	0.665083	0.4689	0.638094	0.590692	8.26969	57.8878		1.81307	6.43012	7.42967	6.42245	6.76075	47.3252
		1.87155	0.419241	0.36848	0.445888	0.411203	5.75684	40.2979		1.87155	5.90796	6.62673	5.74128	6.09199	42.6439
		1.93004	0.188273	0.398801	0.175576	0.254217	3.55903	24.9132		1.93004	4.82951	4.76898	4.80038	4.79962	33.5974
		1.98852	0.271732	0.248905	0.110174	0.21027	2.94378	20.6065		1.98852	4.3848	4.58394	4.16966	4.37947	30.6563
		2.04701	0.369572	0.205669	0.239701	0.271647	3.80306	26.6214		2.04701	4.43143	4.59897	3.35902	4.12981	28.9086
		2.1055	0.276877	0.156447	0.296334	0.243219	3.40507	23.8355		2.1055	4.04981	4.24145	3.7466	4.01262	28.0883
		2.16398	0.188264	0.207256	0.181135	0.192218	2.69106	18.8374		2.16398	4.07539	4.22805	3.19861	3.83402	26.8381
		2.22247	0.142381	0.150395	0.11736	0.136712	1.91397	13.3978		2.22247	4.76971	3.99497	2.95221	3.90563	27.3394
		2.28095	0.198195	0.121726	0.066024	0.128648	1.80108	12.6075		2.28095	4.4655	3.8884	2.9988	3.78423	26.4896
		2.33944	0.168546	0.116277	0.188446	0.157756	2.20859	15.4601		2.33944	3.98537	3.9834	3.85741	3.94206	27.5944
		2.39793	0.098712	0.087515	0.06941	0.0852123	1.19297	8.35081		2.39793	3.67235	3.52596	4.37191	3.85674	26.9972
		2.45641	0.070359	0.137663	0.090108	0.0993767	1.39127	9.73891		2.45641	4.10555	3.38096	4.29968	3.92873	27.5011
		2.5149	0.027826	0.1469	0.060296	0.0783407	1.09677	7.67739		2.5149	4.1104	3.75421	3.50592	3.79018	26.5312
		2.57338	0.035182	0.169284	0.111116	0.105194	1.47272	10.309		2.57338	3.80687	4.29552	3.09237	3.73159	26.1211
		2.63187	0.037837	0.173153	0.044283	0.085091	1.19127	8.33892		2.63187	3.86635	4.86175	2.4025	3.7102	25.9714
		2.69036	0.037622	0.168479	0.019896	0.0753323	1.05465	7.38257		2.69036	3.44638	5.14213	1.95021	3.51291	24.5903
		2.74884	0.064074	0.267981	0.029927	0.120661	1.68925	11.8247		2.74884	2.75463	4.59434	1.71106	3.02001	21.1401
		2.80733	0.07347	0.172132	0.043	0.0962007	1.34681	9.42767		2.80733	2.1747	3.79617	1.52923	2.50003	17.5002
		exc-5(xn108); pkc-3(it309); xnEx523[t28h11.8p::cfp, pRF4] B1 3rd replicate 022719
		image001
		red channel (exc-5-zf1-mscar)	measurements					multiply to fit to y-axis		green channel (gfp-pkc-3)	measurements				multiply to fit to y-axis
		distance (microns)	m1	m2	m3	avg	normalize to gfp	*7		distance (microns)	m1	m2	m3	avg	*7
		0	0.038595	0	0	0.012865	0.18011	1.26077		0	3.8231	3.14326	3.39584	3.45407	24.1785
		0.05849	0.032501	0	0.026953	0.019818	0.277452	1.94216		0.05849	4.0003	3.50693	3.18065	3.56263	24.9384
		0.11697	0.00345	0.034993	0.021377	0.01994	0.27916	1.95412		0.11697	4.144	3.65552	3.36869	3.72274	26.0592
		0.17546	0.044036	0.056198	0.052551	0.0509283	0.712997	4.99098		0.17546	4.1799	3.69416	4.05989	3.97798	27.8459
		0.23394	0.07817	0.101396	0.105259	0.0949417	1.32918	9.30428		0.23394	4.3943	3.83102	4.21662	4.14731	29.0312
		0.29243	0.089584	0.106781	0.130144	0.108836	1.52371	10.666		0.29243	3.9977	4.05722	4.31702	4.12398	28.8679
		0.35092	0.049552	0.081661	0.108423	0.0798787	1.1183	7.82811		0.35092	4.6906	4.61011	4.26304	4.52125	31.6487
		0.4094	0.026888	0.170994	0.121575	0.106486	1.4908	10.4356		0.4094	4.9739	4.94777	4.52682	4.81616	33.7131
		0.46789	0.094777	0.197137	0.093631	0.128515	1.79921	12.5945		0.46789	5.1685	5.23989	4.89422	5.10087	35.7061
		0.52637	0.039263	0.123125	0.159496	0.107295	1.50213	10.5149		0.52637	5.8637	5.17258	5.15284	5.39637	37.7746
		0.58486	0.041313	0.162203	0.147391	0.116969	1.63757	11.463		0.58486	6.0225	5.19651	5.36171	5.52691	38.6883
		0.64335	0.1324	0.164	0.151557	0.149319	2.09047	14.6333		0.64335	6.2153	6.02446	5.61691	5.95222	41.6656
		0.70183	0.216367	0.19163	0.150978	0.186325	2.60855	18.2598		0.70183	6.2796	6.61172	6.06455	6.31862	44.2304
		0.76032	0.244557	0.293792	0.151483	0.229944	3.21922	22.5345		0.76032	6.7104	7.23154	6.48058	6.80751	47.6525
		0.8188	0.411551	0.272554	0.305959	0.330021	4.6203	32.3421		0.8188	7.2518	7.98329	6.97528	7.40346	51.8242
		0.87729	0.310303	0.404345	0.204398	0.306349	4.28888	30.0222		0.87729	8.3938	9.45057	7.83504	8.5598	59.9186
		0.93578	0.540987	0.557261	0.56978	0.556009	7.78413	54.4889		0.93578	10.333	10.3076	9.1553	9.93197	69.5238
		0.99426	0.674334	0.625177	0.81364	0.704384	9.86137	69.0296		0.99426	11.9872	11.0174	10.1171	11.0406	77.2839
		1.05275	0.581262	0.764467	0.589975	0.645235	9.03329	63.233		1.05275	11.9833	10.6292	10.0378	10.8834	76.1839
		1.11123	0.318854	0.405984	0.604591	0.443143	6.204	43.428		1.11123	11.3482	8.78672	9.32358	9.8195	68.7365
		1.16972	0.294182	0.55181	0.451752	0.432581	6.05614	42.393		1.16972	9.4972	6.7186	8.95253	8.38944	58.7261
		1.22821	0.281806	0.340104	0.369927	0.330612	4.62857	32.4		1.22821	8.6254	6.66758	8.29878	7.86392	55.0474
		1.28669	0.234083	0.111	0.283273	0.209452	2.93233	20.5263		1.28669	7.584	7.17632	8.3621	7.70747	53.9523
		1.34518	0.188344	0.124596	0.217461	0.1768	2.4752	17.3264		1.34518	6.468	7.2042	8.56101	7.41107	51.8775
		1.40366	0.120514	0.159627	0.265322	0.181821	2.54549	17.8185		1.40366	5.8281	6.74487	8.33468	6.96922	48.7845
		1.46215	0.156465	0.205684	0.30239	0.221513	3.10118	21.7083		1.46215	5.8386	7.30738	7.56526	6.90375	48.3262
		1.52064	0.147677	0.518934	0.333509	0.333373	4.66723	32.6706		1.52064	5.8883	8.05723	7.64373	7.19642	50.3749
		1.57912	0.120729	0.49568	0.350068	0.322159	4.51023	31.5716		1.57912	6.5684	8.12059	8.37767	7.68889	53.8222
		1.63761	0.27701	0.756144	0.436959	0.490038	6.86053	48.0237		1.63761	7.306	9.50309	8.62614	8.47841	59.3489
		1.69609	0.350097	0.637089	0.655476	0.547554	7.66576	53.6603		1.69609	8.8307	10.7515	9.67015	9.75079	68.2556
		1.75458	0.616458	0.814806	0.668054	0.699773	9.79682	68.5777		1.75458	11.6286	11.0998	10.39	11.0395	77.2763
		1.81307	0.86134	0.936799	0.670802	0.82298	11.5217	80.6521		1.81307	15.1238	10.5981	10.6224	12.1148	84.8033
		1.87155	0.71797	0.751136	0.714862	0.727989	10.1919	71.343		1.87155	14.8284	10.0291	9.92729	11.5949	81.1645
		1.93004	0.544094	0.454528	0.595328	0.531317	7.43843	52.069		1.93004	12.9612	9.58114	9.15838	10.5669	73.9683
		1.98852	0.485913	0.530824	0.531125	0.515954	7.22336	50.5635		1.98852	10.3231	8.53648	8.92862	9.26273	64.8391
		2.04701	0.378923	0.56973	0.581029	0.509894	7.13852	49.9696		2.04701	8.7163	8.04628	7.81699	8.19319	57.3523
		2.1055	0.362419	0.510871	0.551388	0.474893	6.6485	46.5395		2.1055	8.117	6.86957	7.01568	7.33408	51.3386
		2.16398	0.403552	0.421543	0.44414	0.423078	5.9231	41.4617		2.16398	7.4917	6.47536	6.51917	6.82874	47.8012
		2.22247	0.37049	0.352255	0.290127	0.337624	4.72674	33.0872		2.22247	7.065	6.11331	5.82563	6.33465	44.3425
		2.28095	0.354624	0.21962	0.401119	0.325121	4.55169	31.8619		2.28095	6.907	5.71396	5.53332	6.05143	42.36
		2.33944	0.406068	0.201283	0.207943	0.271765	3.80471	26.6329		2.33944	6.2453	5.47741	5.21711	5.64661	39.5262
		2.39793	0.397333	0.11346	0.27077	0.260521	3.64729	25.5311		2.39793	5.8725	5.12285	5.08025	5.35853	37.5097
		2.45641	0.277198	0.16098	0.284438	0.240872	3.37221	23.6055		2.45641	5.7135	5.15232	5.16537	5.34373	37.4061
		2.5149	0.251437	0.08698	0.275049	0.204489	2.86284	20.0399		2.5149	5.9881	4.39481	5.4107	5.26454	36.8518
		2.57338	0.305007	0.040056	0.20602	0.183694	2.57172	18.002		2.57338	5.4445	3.76231	4.6138	4.60687	32.2481
		2.63187	0.257433	0.011732	0.088834	0.119333	1.67066	11.6946		2.63187	5.293	3.2664	4.02568	4.19503	29.3652
		2.69036	0.23796	0.00561	0.015802	0.0864573	1.2104	8.47282		2.69036	4.3907	2.75994	3.61703	3.58922	25.1246
		2.74884	0.188538	0	0.014421	0.067653	0.947142	6.62999		2.74884	4.417	2.13878	3.17878	3.24485	22.714
		2.80733	0.215877	0	0	0.071959	1.00743	7.05198		2.80733	4.2014	1.88861	3.12666	3.07222	21.5056
		ant2
		red channel (exc-5-zf1-mscar)	measurements					multiply to fit to y-axis		green channel (gfp-pkc-3)	measurements				multiply to fit to y-axis
		distance (microns)	m1	m2	m3	avg	normalize to gfp	*7		distance (microns)	m1	m2	m3	avg	*7
		0	0	0	0	0	0	0		0	1.67776	2.5153	1.80447	1.99918	13.9942
		0.05849	0	0	0	0	0	0		0.05849	1.73211	2.3751	1.96753	2.02491	14.1744
		0.11697	0	0	0	0	0	0		0.11697	2.02703	2.6201	1.83071	2.15928	15.115
		0.17546	0	0.056959	0	0.0189863	0.265809	1.86066		0.17546	1.9354	3.2487	2.29889	2.49433	17.4603
		0.23394	0.011564	0.233638	0.000592	0.0819313	1.14704	8.02927		0.23394	2.49159	4.2193	3.13458	3.28182	22.9728
		0.29243	0.072625	0.243907	0.074838	0.130457	1.82639	12.7848		0.29243	3.15383	5.6185	3.18919	3.98717	27.9102
		0.35092	0.18491	0.15744	0.077794	0.140048	1.96067	13.7247		0.35092	3.88248	6.3749	4.49543	4.9176	34.4232
		0.4094	0.101478	0.168503	0.020673	0.0968847	1.35639	9.4947		0.4094	4.81464	6.7929	4.92498	5.51084	38.5759
		0.46789	0.174586	0.179969	0.194719	0.183091	2.56328	17.943		0.46789	5.0896	6.7527	6.09812	5.98014	41.861
		0.52637	0.235424	0.089494	0.185202	0.17004	2.38056	16.6639		0.52637	5.5068	6.8392	6.86348	6.40316	44.8221
		0.58486	0.319828	0.087911	0.212638	0.206792	2.89509	20.2656		0.58486	5.99473	7.0429	6.72865	6.58876	46.1213
		0.64335	0.116518	0.210121	0.147514	0.158051	2.21271	15.489		0.64335	6.33481	7.6142	6.89282	6.94728	48.6309
		0.70183	0.142693	0.242405	0.232112	0.205737	2.88031	20.1622		0.70183	6.53543	8.0674	7.23834	7.28039	50.9627
		0.76032	0.24917	0.338992	0.299283	0.295815	4.14141	28.9899		0.76032	7.55781	8.7903	8.21067	8.18626	57.3038
		0.8188	0.375056	0.349662	0.590979	0.438566	6.13992	42.9794		0.8188	8.31539	10.2719	9.23171	9.273	64.911
		0.87729	0.455528	0.399513	0.690636	0.515226	7.21316	50.4921		0.87729	9.51145	12.1077	10.765	10.7947	75.563
		0.93578	0.487141	0.679464	0.518838	0.561814	7.8654	55.0578		0.93578	10.1904	12.7661	11.5062	11.4876	80.413
		0.99426	0.570685	0.691391	0.43583	0.565969	7.92356	55.4649		0.99426	10.2025	10.8418	9.87586	10.3067	72.1471
		1.05275	0.309219	0.472469	0.288368	0.356685	4.99359	34.9552		1.05275	9.69698	8.5562	7.45396	8.56905	59.9833
		1.11123	0.293985	0.371793	0.25611	0.307296	4.30214	30.115		1.11123	8.11539	6.9105	5.80837	6.94475	48.6133
		1.16972	0.277726	0.242073	0.327297	0.282365	3.95311	27.6718		1.16972	6.15475	5.4901	4.55068	5.39851	37.7896
		1.22821	0.224165	0.142476	0.185255	0.183965	2.57551	18.0286		1.22821	5.30208	4.7015	4.02099	4.67486	32.724
		1.28669	0.185883	0.114201	0.198494	0.166193	2.3267	16.2869		1.28669	4.60555	3.9958	3.20121	3.93419	27.5393
		1.34518	0.205309	0.193026	0.281534	0.226623	3.17272	22.2091		1.34518	4.21165	3.5686	3.16773	3.64933	25.5453
		1.40366	0.238689	0.050619	0.161379	0.150229	2.10321	14.7224		1.40366	4.11644	3.5006	3.25986	3.62563	25.3794
		1.46215	0.197548	0.080221	0.187559	0.155109	2.17153	15.2007		1.46215	4.25082	3.574	3.30013	3.70832	25.9582
		1.52064	0.141605	0.125395	0.220272	0.162424	2.27394	15.9176		1.52064	4.20893	3.7192	3.75713	3.89509	27.2656
		1.57912	0.186735	0.157165	0.253528	0.199143	2.788	19.516		1.57912	4.15431	3.804	4.03225	3.99685	27.978
		1.63761	0.271093	0.294293	0.143941	0.236442	3.31019	23.1713		1.63761	5.23118	4.303	4.70079	4.74499	33.2149
		1.69609	0.473939	0.326604	0.183465	0.328003	4.59204	32.1443		1.69609	7.11012	5.7652	5.37498	6.08343	42.584
		1.75458	0.53072	0.40052	0.235094	0.388778	5.44289	38.1002		1.75458	8.78596	8.193	6.86767	7.94888	55.6421
		1.81307	0.651513	0.715315	0.440465	0.602431	8.43403	59.0382		1.81307	10.1667	11.2373	8.91554	10.1065	70.7456
		1.87155	0.493197	0.661379	0.626568	0.593715	8.31201	58.184		1.87155	10.3239	13.2045	10.2741	11.2675	78.8726
		1.93004	0.335876	0.710283	0.558995	0.535051	7.49072	52.435		1.93004	10.0043	13.7154	10.8201	11.5132	80.5927
		1.98852	0.258829	0.48125	0.511276	0.417118	5.83966	40.8776		1.98852	9.87577	11.5709	10.2517	10.5661	73.9628
		2.04701	0.259813	0.536687	0.495711	0.430737	6.03032	42.2122		2.04701	8.5678	9.6306	8.70321	8.9672	62.7704
		2.1055	0.110344	0.329764	0.371676	0.270595	3.78833	26.5183		2.1055	8.00651	8.12	8.00089	8.04247	56.2973
		2.16398	0.133236	0.252741	0.17488	0.186952	2.61733	18.3213		2.16398	7.38226	7.0115	7.21597	7.20324	50.4227
		2.22247	0.123848	0.385849	0.144689	0.218129	3.0538	21.3766		2.22247	6.39076	7.0404	6.8672	6.76612	47.3628
		2.28095	0.241583	0.328877	0.143982	0.238147	3.33406	23.3384		2.28095	6.43291	6.556	6.43201	6.47364	45.3155
		2.33944	0.142621	0.198618	0.234569	0.191936	2.6871	18.8097		2.33944	5.73465	6.2051	6.50359	6.14778	43.0345
		2.39793	0.139324	0.209374	0.1399	0.162866	2.28012	15.9609		2.39793	5.22806	5.9379	6.3136	5.82652	40.7856
		2.45641	0.0841	0.256579	0.177164	0.172614	2.4166	16.9162		2.45641	4.75719	5.8183	5.42427	5.33325	37.3328
		2.5149	0.095825	0.216011	0.067336	0.126391	1.76947	12.3863		2.5149	4.43101	5.3586	4.81309	4.86757	34.073
		2.57338	0.104694	0.129796	0.064465	0.0996517	1.39512	9.76586		2.57338	4.33397	5.6884	4.59617	4.87285	34.1099
		2.63187	0.167142	0.156048	0.01619	0.113127	1.58377	11.0864		2.63187	4.6863	5.3175	4.03021	4.678	32.746
		2.69036	0.090945	0.130056	0.088179	0.10306	1.44284	10.0999		2.69036	5.00593	5.3386	3.6743	4.67294	32.7106
		2.74884	0.10153	0.212896	0.069339	0.127922	1.7909	12.5363		2.74884	5.44783	4.7808	3.41281	4.54715	31.83
		2.80733	0.121882	0.107166	0.026112	0.0850533	1.19075	8.33523		2.80733	5.41976	4.0478	3.12719	4.19825	29.3877

## Sheet: Figure 7I - source data
		Figure 7I - source data. Fluorescent intensity values for line trace measurements of EXC-5::ZF1::mScarlet; GFP::PKC-3 (heat shock ZIF-1)
		exc-5(xn108); pkc-3(it309[gfp::pkc-3]); xnEx519[hsp-16.41p::zif-1; t28h11.8p::CFP, pRF4] 2nd replicate 022719
		image010
		red channel (exc-5-zf1-mscar)	measurements					multiply to fit to y-axis			green channel (gfp-pkc-3)	measurements				multiply to fit to y-axis
		distance (microns)	m1	m2	m3	avg	normalize to gfp	*7			distance (microns)	m1	m2	m3	avg	*7
		-1.404	0	0	0.0073923	0.0024641	0.0344974	0.241482			0	6.34258	2.35181	4.93858	4.54432	31.8103
		-1.3455	0	0	0.003676	0.00122533	0.0171547	0.120083			0.05849	6.57364	2.50749	4.33206	4.47106	31.2974
		-1.287	0	0	0.0295918	0.00986393	0.138095	0.966665			0.11697	6.46822	3.30737	4.5458	4.7738	33.4166
		-1.2285	0	0	0.0009113	0.000303767	0.00425273	0.0297691			0.17546	6.93146	4.12382	4.63612	5.23047	36.6133
		-1.17	0	0	0.0305771	0.0101924	0.142693	0.998852			0.23394	6.96576	4.9757	4.94526	5.62891	39.4023
		-1.1115	0	0	0.0027752	0.000925067	0.0129509	0.0906565			0.29243	6.52817	5.97746	5.17237	5.89267	41.2487
		-1.053	0	0	0.0324165	0.0108055	0.151277	1.05894			0.35092	6.32969	6.58023	5.04723	5.98572	41.9
		-0.9945	0	0	0	0	0	0			0.4094	6.10478	6.90493	5.25733	6.08901	42.6231
		-0.936	0	0	0	0	0	0			0.46789	6.16595	6.75296	5.20666	6.04186	42.293
		-0.8775	0	0	0	0	0	0			0.52637	6.03605	6.18049	5.07288	5.76314	40.342
		-0.819	0	0	0	0	0	0			0.58486	5.71933	6.06372	5.29214	5.69173	39.8421
		-0.7605	0	0	0	0	0	0			0.64335	6.04402	6.09505	5.39779	5.84562	40.9193
		-0.702	0	0	0	0	0	0			0.70183	5.81464	6.0592	5.6207	5.83151	40.8206
		-0.6435	0	0	0	0	0	0			0.76032	5.93791	6.45289	6.36874	6.25318	43.7723
		-0.585	0	0	0	0	0	0			0.8188	6.17337	5.82914	6.28141	6.09464	42.6625
		-0.5265	0	0	0	0	0	0			0.87729	6.19715	5.92001	6.34759	6.15492	43.0844
		-0.468	0	0	0	0	0	0			0.93578	6.83451	6.52053	6.76324	6.70609	46.9427
		-0.4095	0	0	0	0	0	0			0.99426	6.96882	6.77625	6.54088	6.76198	47.3339
		-0.351	0	0	0	0	0	0			1.05275	6.9818	6.52712	5.39675	6.30189	44.1132
		-0.2925	0	0	0	0	0	0			1.11123	5.64202	6.17399	4.38332	5.39978	37.7984
		-0.234	0	0	0	0	0	0			1.16972	4.61962	5.91214	3.58959	4.70712	32.9498
		-0.1755	0	0	0	0	0	0			1.22821	4.09989	5.00292	2.94278	4.0152	28.1064
		-0.117	0	0	0	0	0	0			1.28669	3.43056	4.33551	2.56132	3.44246	24.0972
		-0.0585	0	0	0	0	0	0			1.34518	3.27197	3.36294	2.87493	3.16995	22.1896
		0	0	0	0	0	0	0			1.40366	2.99707	2.82174	2.71552	2.84478	19.9134
		0.05849	0	0	0	0	0	0			1.46215	3.15808	2.98221	2.5439	2.89473	20.2631
		0.11697	0	0	0	0	0	0			1.52064	3.03918	3.09036	2.54928	2.89294	20.2506
		0.17546	0	0	0	0	0	0			1.57912	3.36229	3.66801	2.89249	3.3076	23.1532
		0.23394	0	0	0.0009778	0.000325933	0.00456307	0.0319415			1.63761	3.84941	4.61881	3.10138	3.85653	26.9957
		0.29243	0	0	0.0312207	0.0104069	0.145697	1.01988			1.69609	4.8345	5.5222	3.77375	4.71015	32.971
		0.35092	0	0	0.0007969	0.000265633	0.00371887	0.0260321			1.75458	5.97057	6.17262	4.967	5.7034	39.9238
		0.4094	0	0	0	0	0	0			1.81307	6.56872	6.77731	5.90546	6.41716	44.9201
		0.46789	0	0	0	0	0	0			1.87155	6.70215	6.935	6.61403	6.75039	47.2528
		0.52637	0	0	0	0	0	0			1.93004	6.76719	6.95735	6.17835	6.6343	46.4401
		0.58486	0	0	0	0	0	0			1.98852	6.211	6.76275	5.89497	6.28957	44.027
		0.64335	0	0	0	0	0	0			2.04701	6.05405	6.65225	5.23943	5.98191	41.8734
		0.70183	0	0	0	0	0	0			2.1055	6.01159	6.62047	5.10636	5.91281	41.3896
		0.76032	0	0.0002983	0	9.94333e-05	0.00139207	0.00974447			2.16398	6.33981	6.31382	5.17311	5.94225	41.5957
		0.8188	0	0.0299675	0	0.00998917	0.139848	0.978938			2.22247	6.41195	6.23813	5.29408	5.98139	41.8697
		0.87729	0	0.0027293	0	0.000909767	0.0127367	0.0891571			2.28095	6.30961	6.45939	5.29668	6.02189	42.1533
		0.93578	0	0	0	0	0	0			2.33944	6.37028	6.36425	5.27629	6.00361	42.0252
		0.99426	0	0	0	0	0	0			2.39793	6.65195	6.305	5.19671	6.05122	42.3585
		1.05275	0	0	0	0	0	0			2.45641	6.30482	5.98731	5.49903	5.93039	41.5127
		1.11123	0	0	0	0	0	0			2.5149	6.0994	5.58307	5.17418	5.61888	39.3322
		1.16972	0	0	0	0	0	0			2.57338	5.33361	5.86931	4.69457	5.29916	37.0941
		1.22821	0	0	0	0	0	0			2.63187	3.97131	5.78826	4.47759	4.74572	33.22
		1.28669	0	0.0130333	0	0.00434443	0.0608221	0.425754			2.69036	3.03748	5.47508	4.67283	4.39513	30.7659
		1.34518	0	0.0514574	0	0.0171525	0.240135	1.68094			2.74884	2.51267	5.61062	4.46815	4.19715	29.38
		1.40366	0	0.0017366	0	0.000578867	0.00810413	0.0567289			2.80733	2.16261	5.21328	4.12427	3.83339	26.8337
		image009
		red channel (exc-5-zf1-mscar)	measurements					multiply to fit to y-axis			green channel (gfp-pkc-3)	measurements				multiply to fit to y-axis
		distance (microns)	m1	m2	m3	avg	normalize to gfp	*7			distance (microns)	m1	m2	m3	avg	*7
		0	0	0	0	0	0	0			0	1.19289	2.76095	3.39411	2.44932	17.1452
		0.05849	0	0	0	0	0	0			0.05849	1.3024	2.81782	3.39586	2.50536	17.5375
		0.11697	0	0	0	0	0	0			0.11697	1.60459	3.32278	4.00905	2.97881	20.8516
		0.17546	0	0	0	0	0	0			0.17546	2.04945	4.03905	4.47408	3.52086	24.646
		0.23394	0	0	0	0	0	0			0.23394	2.67978	4.72095	4.80854	4.06976	28.4883
		0.29243	0	0	0	0	0	0			0.29243	3.18569	4.86032	4.69046	4.24549	29.7184
		0.35092	0	0	0	0	0	0			0.35092	3.64495	4.96283	4.69432	4.43403	31.0382
		0.4094	0	0	0	0	0	0			0.4094	4.35701	4.81864	4.42355	4.53307	31.7315
		0.46789	0	0	0	0	0	0			0.46789	5.02216	4.74414	4.48302	4.74977	33.2484
		0.52637	0	0	0	0	0	0			0.52637	5.14251	4.85482	4.36261	4.78665	33.5065
		0.58486	0	0	0	0	0	0			0.58486	4.93977	4.7824	4.67376	4.79864	33.5905
		0.64335	0	0	0	0	0	0			0.64335	4.55128	4.67257	4.76015	4.66133	32.6293
		0.70183	0	0	0	0	0	0			0.70183	4.31317	4.73377	4.72545	4.5908	32.1356
		0.76032	0	0	0	0	0	0			0.76032	4.60764	4.45776	4.76883	4.61141	32.2799
		0.8188	0	0	0	0	0	0			0.8188	4.86965	4.89461	5.3446	5.03629	35.254
		0.87729	0	0	0	0	0	0			0.87729	4.98866	5.43391	5.53554	5.31937	37.2356
		0.93578	0	0	0	0	0	0			0.93578	5.20955	5.89149	5.18037	5.42714	37.99
		0.99426	0	0	0	0	0	0			0.99426	4.97485	5.31989	5.02408	5.10627	35.7439
		1.05275	0	0	0	0	0	0			1.05275	4.18246	4.49147	4.27781	4.31725	30.2207
		1.11123	0	0	0	0	0	0			1.11123	3.69102	3.51958	4.18612	3.79891	26.5923
		1.16972	0	0	0	0	0	0			1.16972	3.20677	2.54144	3.61068	3.11963	21.8374
		1.22821	0	0	0	0	0	0			1.22821	2.84262	1.98729	2.6463	2.49207	17.4445
		1.28669	0	0	0	0	0	0			1.28669	2.38773	1.90564	2.459	2.25079	15.7555
		1.34518	0	0	0	0	0	0			1.34518	2.2134	1.84395	1.82291	1.96009	13.7206
		1.40366	0	0	0	0	0	0			1.40366	2.09525	1.78499	1.40259	1.76094	12.3266
		1.46215	0	0	0	0	0	0			1.46215	1.9244	2.14483	1.40783	1.82569	12.7798
		1.52064	0	0	0	0	0	0			1.52064	1.95612	2.16659	1.35765	1.82679	12.7875
		1.57912	0	0	0	0	0	0			1.57912	1.81247	2.16261	1.59663	1.85724	13.0007
		1.63761	0	0	0	0	0	0			1.63761	2.24916	2.43573	1.68462	2.12317	14.8622
		1.69609	0	0	0	0	0	0			1.69609	2.86717	3.3621	2.03375	2.75434	19.2804
		1.75458	0	0	0	0	0	0			1.75458	3.13982	3.93356	2.44075	3.17138	22.1996
		1.81307	0	0	0.0235341	0.0078447	0.109826	0.768781			1.81307	3.66742	4.93625	3.11114	3.90494	27.3346
		1.87155	0	0	0.0097493	0.00324977	0.0454967	0.318477			1.87155	4.70547	5.1596	4.0464	4.63716	32.4601
		1.93004	0	0	0	0	0	0			1.93004	4.64518	5.06296	4.71143	4.80652	33.6457
		1.98852	0	0	0	0	0	0			1.98852	4.50096	4.70063	5.28168	4.82776	33.7943
		2.04701	0	0	0	0	0	0			2.04701	4.65103	4.5822	4.78292	4.67205	32.7043
		2.1055	0	0	0	0	0	0			2.1055	4.49529	4.83797	4.54362	4.62563	32.3794
		2.16398	0	0	0	0	0	0			2.16398	4.84441	4.63739	4.41301	4.6316	32.4212
		2.22247	0	0	0	0	0	0			2.22247	4.99724	4.85913	4.38051	4.74563	33.2194
		2.28095	0	0	0	0	0	0			2.28095	4.82235	5.01043	3.87018	4.56765	31.9736
		2.33944	0	0	0	0	0	0			2.33944	3.77808	4.92545	3.39319	4.03224	28.2257
		2.39793	0	0	0	0	0	0			2.39793	3.08903	4.49277	3.86513	3.81564	26.7095
		2.45641	0	0	0	0	0	0			2.45641	2.62479	4.09512	4.13492	3.61828	25.3279
		2.5149	0	0	0	0	0	0			2.5149	2.1347	3.6243	4.13363	3.29754	23.0828
		2.57338	0	0	0	0	0	0			2.57338	2.29359	3.13088	4.0888	3.17109	22.1976
		2.63187	0	0	0	0	0	0			2.63187	2.23683	2.55392	3.49927	2.76334	19.3434
		2.69036	0	0	0	0	0	0			2.69036	2.04974	2.20851	2.58013	2.27946	15.9562
		2.74884	0	0	0	0	0	0			2.74884	1.8083	2.13732	2.16405	2.03656	14.2559
		2.80733	0	0	0	0	0	0			2.80733	1.73147	2.46742	1.99743	2.06544	14.4581
		exc-5(xn108); pkc-3(it309[gfp::pkc-3]); xnEx519[hsp-16.41p::zif-1; t28h11.8p::CFP, pRF4] 3rd replicate 022719
		image011
		red channel (exc-5-zf1-mscar)	measurements					multiply to fit to y-axis			green channel (gfp-pkc-3)	measurements				multiply to fit to y-axis
		distance (microns)	m1	m2	m3	avg	normalize to gfp	*7			distance (microns)	m1	m2	m3	avg	*7
		0	0	0	0	0	0	0			0	1.60724	1.78082	1.77862	1.72223	12.0556
		0.05849	0	0	0	0	0	0			0.05849	1.98254	1.86088	1.61716	1.82019	12.7414
		0.11697	0	0	0	0	0	0			0.11697	2.07978	2.26209	2.03175	2.12454	14.8718
		0.17546	0	0	0	0	0	0			0.17546	2.18882	2.65382	2.51326	2.45197	17.1638
		0.23394	0	0	0	0	0	0			0.23394	2.58487	2.69344	2.30092	2.52641	17.6849
		0.29243	0	0	0	0	0	0			0.29243	2.78915	2.68131	2.73455	2.735	19.145
		0.35092	0	0	0	0	0	0			0.35092	2.92274	2.59597	2.90397	2.80756	19.6529
		0.4094	0	0	0	0	0	0			0.4094	3.0717	2.77506	2.61432	2.82036	19.7425
		0.46789	0	0	0	0	0	0			0.46789	2.90102	2.41229	2.31493	2.54275	17.7992
		0.52637	0	0	0	0	0	0			0.52637	2.43568	2.75946	2.64868	2.61461	18.3022
		0.58486	0	0	0	0	0	0			0.58486	2.7152	2.83038	2.71017	2.75192	19.2634
		0.64335	0.0157947	0	0	0.00526491	0.0737088	0.515962			0.64335	3.03133	3.06481	2.95778	3.01797	21.1258
		0.70183	0.0187584	0	0	0.00625281	0.0875393	0.612775			0.70183	2.84221	2.74367	3.02867	2.87152	20.1006
		0.76032	0	0	0	0	0	0			0.76032	2.53231	3.40549	3.03211	2.98997	20.9298
		0.8188	0	0	0	0	0	0			0.8188	3.12015	3.73924	3.3282	3.39586	23.771
		0.87729	0	0	0	0	0	0			0.87729	3.28713	3.84765	3.86419	3.66632	25.6643
		0.93578	0	0	0	0	0	0			0.93578	3.60237	3.92805	4.27341	3.93461	27.5423
		0.99426	0	0	0	0	0	0			0.99426	3.54739	3.43212	3.76907	3.58286	25.08
		1.05275	0	0	0	0	0	0			1.05275	3.05113	2.42731	2.69985	2.7261	19.0827
		1.11123	0	0	0	0	0	0			1.11123	2.84994	2.03287	2.03917	2.30733	16.1513
		1.16972	0	0	0	0	0	0			1.16972	2.00132	1.70281	1.91006	1.8714	13.0998
		1.22821	0	0	0	0	0	0			1.22821	1.51066	1.71269	1.47898	1.56744	10.9721
		1.28669	0	0	0	0	0	0			1.28669	1.40929	1.44738	1.36847	1.40838	9.85866
		1.34518	0	0	0	0	0	0			1.34518	1.44546	1.40448	1.30745	1.3858	9.70058
		1.40366	0	0	0	0	0	0			1.40366	1.36437	1.42594	1.24564	1.34532	9.41722
		1.46215	0	0	0	0	0	0			1.46215	1.38058	1.43073	1.41626	1.40919	9.86433
		1.52064	0	0	0	0	0	0			1.52064	1.31311	1.61984	1.60766	1.51354	10.5948
		1.57912	0	0	0	0	0	0			1.57912	1.68246	1.46522	1.78564	1.64444	11.5111
		1.63761	0	0	0	0	0	0			1.63761	1.81997	1.85205	2.15215	1.94139	13.5897
		1.69609	0	0	0	0	0	0			1.69609	2.19217	2.35143	3.27467	2.60609	18.2426
		1.75458	0	0	0	0	0	0			1.75458	2.7764	3.1467	4.00642	3.30984	23.1689
		1.81307	0	0	0	0	0	0			1.81307	3.62894	3.89312	4.06435	3.86214	27.035
		1.87155	0	0	0	0	0	0			1.87155	4.3348	4.31846	4.14072	4.26466	29.8526
		1.93004	0	0	0	0	0	0			1.93004	4.52617	4.31622	4.25972	4.36737	30.5716
		1.98852	0	0	0	0	0	0			1.98852	4.2137	3.89918	3.43629	3.84972	26.9481
		2.04701	0	0	0	0	0	0			2.04701	3.92152	3.66928	3.11978	3.57019	24.9914
		2.1055	0	0	0	0	0	0			2.1055	3.81611	3.22468	3.51347	3.51809	24.6266
		2.16398	0	0	0	0	0	0			2.16398	3.57919	3.6075	3.55908	3.58192	25.0735
		2.22247	0	0	0	0	0	0			2.22247	3.31372	3.67327	3.61155	3.53285	24.7299
		2.28095	0	0.002503	0	0.000834333	0.0116807	0.0817647			2.28095	3.34712	3.54996	3.46338	3.45349	24.1744
		2.33944	0	0	0	0	0	0			2.33944	3.47437	3.67288	3.12162	3.42296	23.9607
		2.39793	0	0.042152	0	0.0140507	0.196709	1.37697			2.39793	3.04476	3.39832	3.32989	3.25766	22.8036
		2.45641	0	0.103266	0	0.034422	0.481908	3.37336			2.45641	3.10143	3.56712	3.42731	3.36529	23.557
		2.5149	0	0.043111	0	0.0143703	0.201185	1.40829			2.5149	3.12537	3.44858	3.36367	3.31254	23.1878
		2.57338	0	0.007772	0	0.00259067	0.0362693	0.253885			2.57338	2.98603	3.23098	3.12931	3.11544	21.8081
		2.63187	0	0	0	0	0	0			2.63187	2.47722	2.88533	3.2035	2.85535	19.9874
		2.69036	0	0	0	0	0	0			2.69036	2.42683	2.86525	2.94533	2.7458	19.2206
		2.74884	0	0	0	0	0	0			2.74884	2.37352	2.99269	2.85962	2.74194	19.1936
		2.80733	0	0	0	0	0	0			2.80733	2.34421	2.89811	2.8836	2.70864	18.9605
		image009
		red channel (exc-5-zf1-mscar)	measurements					multiply to fit to y-axis			green channel (gfp-pkc-3)	measurements				multiply to fit to y-axis
		distance (microns)	m1	m2	m3	avg	normalize to gfp	*7			distance (microns)	m1	m2	m3	avg	*7
		0	0	0	0.0185391	0.0061797	0.0865158	0.605611			0	0.77646	0.51047	2.30925	1.19873	8.39109
		0.05849	0	0	0.0151217	0.00504057	0.0705679	0.493976			0.05849	0.90279	0.63555	2.48539	1.34124	9.3887
		0.11697	0	0	0	0	0	0			0.11697	0.73389	0.79827	2.238	1.25672	8.79704
		0.17546	0	0	0	0	0	0			0.17546	1.03612	0.90293	2.1766	1.37188	9.60318
		0.23394	0	0.0213956	0	0.00713187	0.0998461	0.698923			0.23394	1.1549	1.06988	1.896	1.37359	9.61515
		0.29243	0	0.0366702	0	0.0122234	0.171128	1.19789			0.29243	1.49219	1.12167	2.04351	1.55246	10.8672
		0.35092	0	0.0585061	0	0.019502	0.273028	1.9112			0.35092	2.01697	1.57604	2.05229	1.88177	13.1724
		0.4094	0	0.0497919	0	0.0165973	0.232362	1.62654			0.4094	2.26962	1.87134	1.94841	2.02979	14.2085
		0.46789	0	0	0	0	0	0			0.46789	2.10575	1.97111	2.30938	2.12875	14.9012
		0.52637	0	0	0	0	0	0			0.52637	2.50994	1.89967	2.50789	2.30583	16.1408
		0.58486	0	0	0	0	0	0			0.58486	2.82103	1.99757	2.55753	2.45871	17.211
		0.64335	0	0	0	0	0	0			0.64335	2.48545	2.21386	2.61184	2.43705	17.0594
		0.70183	0	0	0	0	0	0			0.70183	2.60716	2.3072	2.7652	2.55985	17.919
		0.76032	0	0	0	0	0	0			0.76032	2.81675	2.70503	2.77225	2.76468	19.3527
		0.8188	0	0	0	0	0	0			0.8188	3.0899	2.44982	3.06633	2.86868	20.0808
		0.87729	0	0	0	0	0	0			0.87729	3.31008	3.08607	3.07027	3.15547	22.0883
		0.93578	0	0	0	0	0	0			0.93578	3.72713	3.33716	3.25786	3.44072	24.085
		0.99426	0	0	0	0	0	0			0.99426	3.65984	3.93592	3.25321	3.61632	25.3143
		1.05275	0	0	0	0	0	0			1.05275	2.88451	3.62088	2.94972	3.1517	22.0619
		1.11123	0	0	0	0	0	0			1.11123	2.41051	3.44704	3.07237	2.97664	20.8365
		1.16972	0	0	0	0	0	0			1.16972	2.16327	2.63522	2.5429	2.44713	17.1299
		1.22821	0	0	0	0	0	0			1.22821	1.92392	2.29693	2.04931	2.09005	14.6304
		1.28669	0	0	0	0	0	0			1.28669	1.70469	2.23048	1.96274	1.96597	13.7618
		1.34518	0	0	0	0	0	0			1.34518	1.44007	2.05495	1.93517	1.81006	12.6704
		1.40366	0	0	0	0	0	0			1.40366	1.92275	2.26117	1.77977	1.9879	13.9153
		1.46215	0	0	0	0	0	0			1.46215	1.9329	2.31255	1.74801	1.99782	13.9847
		1.52064	0	0	0	0	0	0			1.52064	1.67038	1.97971	1.7324	1.79416	12.5591
		1.57912	0	0	0	0	0	0			1.57912	1.99346	2.14209	2.10728	2.08094	14.5666
		1.63761	0	0	0	0	0	0			1.63761	1.99037	2.56952	2.85045	2.47011	17.2908
		1.69609	0	0	0.0103974	0.0034658	0.0485212	0.339648			1.69609	2.54135	2.7423	3.30429	2.86265	20.0385
		1.75458	0	0	0.0232612	0.00775373	0.108552	0.759866			1.75458	3.333	3.22916	3.18779	3.24998	22.7499
		1.81307	0	0	0	0	0	0			1.81307	3.77054	4.04886	3.73538	3.85159	26.9612
		1.87155	0	0	0	0	0	0			1.87155	3.55529	4.06925	3.96158	3.86204	27.0343
		1.93004	0	0	0	0	0	0			1.93004	3.31394	3.5665	3.52968	3.47004	24.2903
		1.98852	0.0097125	0	0	0.0032375	0.045325	0.317275			1.98852	3.15137	3.26519	3.41867	3.27841	22.9489
		2.04701	0.0238453	0	0	0.00794843	0.111278	0.778946			2.04701	2.53725	3.27205	3.0386	2.9493	20.6451
		2.1055	0	0	0	0	0	0			2.1055	2.34174	2.99507	2.91632	2.75104	19.2573
		2.16398	0	0	0	0	0	0			2.16398	2.299	2.59571	3.23932	2.71134	18.9794
		2.22247	0	0	0	0	0	0			2.22247	2.53014	2.66557	2.80262	2.66611	18.6628
		2.28095	0	0	0	0	0	0			2.28095	2.63389	2.38039	2.93861	2.65096	18.5567
		2.33944	0	0	0	0	0	0			2.33944	2.44761	2.82245	3.0474	2.77249	19.4074
		2.39793	0	0	0	0	0	0			2.39793	2.19301	2.58113	2.66077	2.4783	17.3481
		2.45641	0	0	0	0	0	0			2.45641	2.19977	2.33491	2.33818	2.29095	16.0367
		2.5149	0	0	0	0	0	0			2.5149	2.33273	2.37039	2.00694	2.23669	15.6568
		2.57338	0	0	0	0	0	0			2.57338	2.25359	2.33899	2.00264	2.19841	15.3888
		2.63187	0	0	0	0	0	0			2.63187	1.92542	2.07841	1.56577	1.85653	12.9957
		2.69036	0	0	0	0	0	0			2.69036	1.82644	2.22984	1.51386	1.85671	12.997
		2.74884	0	0	0	0	0	0			2.74884	1.57523	1.89558	1.59588	1.6889	11.8223
		2.80733	0	0	0	0	0	0			2.80733	1.32509	1.99533	1.80444	1.70829	11.958
		image007
		red channel (exc-5-zf1-mscar)	measurements					multiply to fit to y-axis			green channel (gfp-pkc-3)	measurements				multiply to fit to y-axis
		distance (microns)	m1	m2	m3	avg	normalize to gfp	*7			distance (microns)	m1	m2	m3	avg	*7
		0	0.00555522	0	0	0.00185174	0.0259244	0.181471			0	1.85555	2.23194	1.56845	1.88531	13.1972
		0.05849	0	0	0	0	0	0			0.05849	1.85556	2.532	1.37754	1.9217	13.4519
		0.11697	0	0	0	0	0	0			0.11697	1.95	2.59235	1.42497	1.98911	13.9237
		0.17546	0	0	0	0	0	0			0.17546	2.41112	2.46845	1.39176	2.09044	14.6331
		0.23394	0	0	0	0	0	0			0.23394	2.36111	2.96223	1.53641	2.28658	16.0061
		0.29243	0	0	0	0	0	0			0.29243	2.30556	3.18919	1.69746	2.3974	16.7818
		0.35092	0	0	0	0	0	0			0.35092	2.41111	3.24726	1.99691	2.55176	17.8623
		0.4094	0	0	0	0	0	0			0.4094	2.29444	3.4915	1.98674	2.59089	18.1363
		0.46789	0	0	0	0	0	0			0.46789	2.37778	3.32412	2.09537	2.59909	18.1936
		0.52637	0	0	0	0	0	0			0.52637	2.53889	3.63489	2.67192	2.94857	20.64
		0.58486	0	0	0	0	0	0			0.58486	2.87223	3.94774	2.7046	3.17486	22.224
		0.64335	0	0	0	0	0	0			0.64335	2.76666	4.06376	2.8397	3.22337	22.5636
		0.70183	0	0	0	0	0	0			0.70183	2.4	3.77122	3.06959	3.08027	21.5619
		0.76032	0	0	0	0	0	0			0.76032	3.41668	4.09569	3.21336	3.57524	25.0267
		0.8188	0	0	0	0	0	0			0.8188	3.66111	4.17578	3.42306	3.75332	26.2732
		0.87729	0	0	0	0	0	0			0.87729	3.80556	4.62607	3.60859	4.01341	28.0938
		0.93578	0	0	0	0	0	0			0.93578	3.27777	4.0946	4.0995	3.82396	26.7677
		0.99426	0	0	0	0	0	0			0.99426	3.44445	3.18495	4.44008	3.68983	25.8288
		1.05275	0	0	0	0	0	0			1.05275	3.11111	2.70114	3.95767	3.25664	22.7965
		1.11123	0	0	0	0	0	0			1.11123	2.25555	1.94958	3.54231	2.58248	18.0774
		1.16972	0	0	0	0	0	0			1.16972	1.96111	1.63923	3.43347	2.3446	16.4122
		1.22821	0	0	0	0	0	0			1.22821	1.93333	1.59988	3.14658	2.2266	15.5862
		1.28669	0	0	0	0	0	0			1.28669	1.79444	1.2351	2.60379	1.87778	13.1444
		1.34518	0	0	0	0	0	0			1.34518	1.32222	1.23541	2.53681	1.69815	11.887
		1.40366	0	0	0	0	0	0			1.40366	1.26111	1.35151	2.10833	1.57365	11.0155
		1.46215	0	0	0	0	0	0			1.46215	1.26667	1.40129	2.56629	1.74475	12.2132
		1.52064	0	0	0	0	0	0			1.52064	1.46111	1.46974	2.91363	1.94816	13.6371
		1.57912	0	0	0	0	0	0			1.57912	1.91667	1.48299	3.54147	2.31371	16.196
		1.63761	0	0	0	0	0	0			1.63761	2.61112	1.76282	3.68562	2.68652	18.8056
		1.69609	0	0	0	0	0	0			1.69609	2.62222	1.95782	4.07344	2.88449	20.1915
		1.75458	0	0	0	0	0	0			1.75458	2.82222	2.12588	3.92254	2.95688	20.6982
		1.81307	0	0	0	0	0	0			1.81307	2.92222	2.83242	4.17655	3.3104	23.1728
		1.87155	0	0	0	0	0	0			1.87155	3.12778	3.12843	3.91842	3.39154	23.7408
		1.93004	0	0	0	0	0	0			1.93004	3.05555	3.6674	3.61927	3.44741	24.1318
		1.98852	0	0	0	0	0	0			1.98852	3.36667	4.07387	3.33331	3.59128	25.139
		2.04701	0	0	0	0	0	0			2.04701	2.93333	4.38332	3.31603	3.54423	24.8096
		2.1055	0	0	0	0	0	0			2.1055	3.25001	4.33963	3.37756	3.65573	25.5901
		2.16398	0	0.0009145	0	0.000304833	0.00426767	0.0298737			2.16398	3.25	3.8506	2.89827	3.33296	23.3307
		2.22247	0	0.0305104	0	0.0101701	0.142382	0.996673			2.22247	2.76111	3.56381	2.71456	3.01316	21.0921
		2.28095	0	0.0025648	0	0.000854933	0.0119691	0.0837835			2.28095	2.83334	3.58191	2.27856	2.89794	20.2856
		2.33944	0	0	0	0	0	0			2.33944	3.2	3.32569	2.37465	2.96678	20.7675
		2.39793	0	0	0	0	0	0			2.39793	2.98889	3.30645	2.46754	2.92096	20.4467
		2.45641	0	0	0	0	0	0			2.45641	2.65555	3.02599	2.23153	2.63769	18.4638
		2.5149	0	0	0	0	0	0			2.5149	2.32222	3.07217	2.04155	2.47865	17.3505
		2.57338	0	0	0	0	0	0			2.57338	1.96111	3.1501	1.64776	2.25299	15.7709
		2.63187	0	0	0	0	0	0			2.63187	1.39999	3.35983	2.07668	2.27883	15.9518
		2.69036	0	0	0	0	0	0			2.69036	1.18889	2.98245	2.04354	2.07163	14.5014
		2.74884	0	0	0	0	0	0			2.74884	1.5	2.43046	1.88892	1.93979	13.5786
		2.80733	0	0	0	0	0	0			2.80733	1.48333	2.23928	1.93138	1.88466	13.1926
