# Supplementary material for: A polarity pathway for exocyst-dependent intracellular tube extension
Source: eLife journal article supplement (doi:10.7554/elife.65169), 2021-03-09
Supplement: supp [file elife-65169-supp-v1.zip › elife_poa_e65169_Figure_7_source_data_2.xlsx]

## Sheet: Figure 7E - source data
	Figure 7E - source data. Fluorescent intensity values for lumenal membrane and cytoplasmic measurements of PAR-6::mKate in ZF1::YFP::CDC-42 background (control vs heat shock ZIF-1)
		Replicate #1
		cdc-42(xn65); par-6(cp60) control 070920								cdc-42(xn65); par-6(cp60); xnEx481[hsp-16.41p::zif-1; t28h11.8p::yfp::sl2::ifb-1::cfp, pRF4] heat shock ZIF-1 070920
		sample #	measurement #	lumen mean intensity	cytoplasm mean intensity		lumen/cytoplasm			sample #	measurement #	lumen mean intensity	cytoplasm mean intensity		lumen/cytoplasm
		image001	1	4.79	1.76		2.72159			image001	1	4.81	2.15		2.23721
			2	4.89	2.01		2.43284				2	5.02	2.16		2.32407
						average	2.57721							average	2.28064
		image002	1	3.89	1.37		2.83942			image002	1	4.75	2.47		1.92308
			2	3.95	1.62		2.43827				2	4.99	2.14		2.33178
						average	2.63884							average	2.12743
						larvae 1 average	2.60803							larvae 1 average	2.20403
		image004	1	4.85	1.95		2.48718			image004	1	3.22	1.67		1.92814
			2	4.78	1.77		2.70056				2	3.45	1.57		2.19745
						average	2.59387							average	2.0628
		image005	1	4.14	1.87		2.2139			image005	1	4.72	1.95		2.42051
			2	4.22	1.88		2.24468				2	4.85	1.94		2.5
						average	2.22929							average	2.46026
						larvae 2 average	2.41158							larvae 2 average	2.26153
		image007	1	4.89	1.21		4.04132			image011	1	4.88	2.29		2.131
			2	4.2	1.07		3.92523				2	4.85	2.1		2.30952
						average	3.98328							average	2.22026
		image008	1	3.7	1.53		2.4183			image012	1	4.5	2.07		2.17391
			2	3.77	1.53		2.46405				2	4.63	2.07		2.23671
						average	2.44118							average	2.20531
						larvae 3 average	3.21223							larvae 3 average	2.21279
		image010	1	2.64	1.14		2.31579			image014	1	2.99	2.7		1.10741
			2	2.71	0.96		2.82292				2	3.16	2.41		1.3112
						average	2.56935							average	1.20931
		image012	1	2.26	0.87		2.5977			image015	1	4.22	2.54		1.66142
			2	2.3	0.67		3.43284				2	4.18	2.43		1.72016
						average	3.01527							average	1.69079
						larvae 4 average	2.79231							larvae 4 average	1.45005
		image014	1	4.23	2.59		1.6332			image017	1	2.8	2.17		1.29032
			2	4.2	2.33		1.80258				2	2.6	1.96		1.32653
						average	1.71789							average	1.30843
		image015	1	3.07	1.25		2.456			image018	1	3.18	1.7		1.87059
			2	3.08	1.09		2.82569				2	3.27	1.69		1.93491
						average	2.64084							average	1.90275
						larvae 5 average	2.17937							larvae 5 average	1.60559
		image017	1	5.34	2.42		2.20661			image020	1	3.44	2.14		1.60748
			2	5.48	2.67		2.05243				2	3.27	1.95		1.67692
						average	2.12952							average	1.6422
		image018	1	4.45	1.47		3.02721			image021	1	3.21	1.38		2.32609
			2	4.25	1.54		2.75974				2	3.28	1.52		2.15789
						average	2.89348							average	2.24199
						larvae 6 average	2.5115							larvae 6 average	1.9421
		image020	1	4.75	2.05		2.31707			image023	1	1.38	1.28		1.07812
			2	4.85	2.09		2.32057				2	1.64	1.33		1.23308
						average	2.31882							average	1.1556
		image021	1	3.04	1.03		2.95146			image024	1	2.95	1.68		1.75595
			2	3.23	0.99		3.26263				2	3.12	1.54		2.02597
						average	3.10704							average	1.89096
						larvae 7 average	2.71293							larvae 7 average	1.52328
		image023	1	6.01	2.38		2.52521			image026	1	4.98	2.25		2.21333
			2	5.93	2.3		2.57826				2	4.73	2.5		1.892
						average	2.55174							average	2.05267
		image025	1	5.23	2.08		2.51442			image027	1	6.04	2.47		2.44534
			2	5.29	2.04		2.59314				2	5.69	2.73		2.08425
						average	2.55378							average	2.2648
						larvae 8 average	2.55276							larvae 8 average	2.15873
										image029	1	6.8	2.98		2.28188
						average	2.62259				2	6.69	3.09		2.16505
						standard deviation	0.595718							average	2.22346
										image030	1	6.56	2.47		2.65587
			replicate #1 averages for Graphpad Superplots								2	6.01	2.17		2.76959
				control	h.s. zif-1									average	2.71273
				2.60803	2.20403
				2.41158	2.26153									larvae 9 average	2.4681
				3.21223	2.21279
				2.79231	1.45005
				2.17937	1.60559									average	1.98069
				2.5115	1.9421									standard deviation	0.418845
				2.71293	1.52328
				2.55276	2.15873
					2.4681
			avg	2.62259	1.98069
		Replicate #2
		cdc-42(xn65); par-6(cp60) control 071520								cdc-42(xn65); par-6(cp60); xnEx481[hsp-16.41p::zif-1; t28h11.8p::yfp::sl2::ifb-1::cfp, pRF4] heat shock ZIF-1 071520
		sample #	measurement #	lumen mean intensity	cytoplasm mean intensity		lumen/cytoplasm			sample #	measurement #	lumen mean intensity	cytoplasm mean intensity		lumen/cytoplasm
		image001	1	5.95	2.77		2.14801			image001	1	4.59	2.1		2.18571
			2	5.95	2.62		2.27099				2	4.56	2.41		1.89212
						average	2.2095							average	2.03892
		image002	1	5.21	2.2		2.36818			image002	1	4.37	2.15		2.03256
			2	5.13	2.4		2.1375				2	4.51	3.05		1.47869
						average	2.25284							average	1.75562
						larvae 1 average	2.23117							larvae 1 average	1.89727
		image004	1	7.87	2.75		2.86182			image005	1	5.25	2.88		1.82292
			2	7.75	2.1		3.69048				2	5.92	2.3		2.57391
						average	3.27615							average	2.19841
		image005	1	4.35	1.33		3.27068			image006	1	4.29	1.85		2.31892
			2	4.19	1.44		2.90972				2	4.27	2.18		1.95872
						average	3.0902							average	2.13882
						larvae 2 average	3.18317							larvae 2 average	2.16862
		image008	1	6.48	2.76		2.34783			image008	1	3.32	1.35		2.45926
			2	6.45	2.76		2.33696				2	3.31	1.81		1.82873
						average	2.34239							average	2.14399
		image009	1	3.68	1.3		2.83077			image009	1	2.82	2.12		1.33019
			2	3.55	1.34		2.64925				2	2.71	1.65		1.64242
						average	2.74001							average	1.48631
						larvae 3 average	2.5412							larvae 3 average	1.81515
		image011	1	5.31	2.33		2.27897			image011	1	1.68	1.45		1.15862
			2	5.22	2.3		2.26957				2	1.75	1.24		1.41129
						average	2.27427							average	1.28496
		image012	1	4.09	1.45		2.82069			image012	1	1.94	1.48		1.31081
			2	3.98	1.21		3.28926				2	2.11	1.48		1.42568
						average	3.05497							average	1.36824
						larvae 4 average	2.66462							larvae 4 average	1.3266
		image014	1	6.55	2.34		2.79915			image014	1	2.32	1.94		1.19588
			2	6.76	2.51		2.69323				2	2.37	1.62		1.46296
						average	2.74619							average	1.32942
		image015	1	5.69	2.25		2.52889			image015	1	2.05	1.5		1.36667
			2	5.6	2.04		2.7451				2	2.17	1.53		1.4183
						average	2.63699							average	1.39248
						larvae 5 average	2.69159							larvae 5 average	1.36095
		image017	1	4.29	1.6		2.68125			image020	1	2.61	1.6		1.63125
			2	3.85	1.48		2.60135				2	2.51	1.44		1.74306
						average	2.6413							average	1.68715
		image018	1	3.19	1.5		2.12667			image021	1	1.93	1.32		1.46212
			2	2.71	1.15		2.35652				2	1.95	1.26		1.54762
						average	2.24159							average	1.50487
						larvae 6 average	2.44145							larvae 6 average	1.59601
		image020	1	6.9	2.99		2.30769			image023	1	1.36	1.06		1.28302
			2	7.22	3.41		2.1173				2	1.21	0.88		1.375
						average	2.2125							average	1.32901
		image021	1	4.97	2.7		1.84074			image024	1	1.77	1.04		1.70192
			2	4.74	1.76		2.69318				2	1.77	0.9		1.96667
						average	2.26696							average	1.83429
						larvae 6 average	2.23973							larvae 7 average	1.58165
						average	2.57042							average	1.67804
						standard deviation	0.417057							standard deviation	0.428863
			replicate #2 averages for Graphpad Superplots
				control	h.s. zif-1
				2.23117	1.89727
				3.18317	2.16862
				2.5412	1.81515
				2.66462	1.3266
				2.69159	1.36095
				2.44145	1.59601
				2.23973	1.58165
			avg	2.57042	1.67804
		Replicate #3
		cdc-42(xn65); par-6(cp60) control 072220								cdc-42(xn65); par-6(cp60); xnEx481[hsp-16.41p::zif-1; t28h11.8p::yfp::sl2::ifb-1::cfp, pRF4] heat shock ZIF-1 072220
		sample #	measurement #	lumen mean intensity	cytoplasm mean intensity		lumen/cytoplasm			sample #	measurement #	lumen mean intensity	cytoplasm mean intensity		lumen/cytoplasm
		image002	1	5.04	2.21		2.28054			image001	1	3.83	1.75		2.18857
			2	5.18	2.13		2.43192				2	3.69	1.7		2.17059
						average	2.35623							average	2.17958
		image003	1	3.07	1.29		2.37984			image002	1	2.87	1.92		1.49479
			2	3.01	1.25		2.408				2	2.71	2.06		1.31553
						average	2.39392							average	1.40516
						larvae 1 average	2.37508							larvae 1 average	1.79237
		image005	1	3.96	1.66		2.38554			image004	1	3.08	1.54		2
			2	4.11	1.51		2.72185				2	3.23	1.48		2.18243
						average	2.5537							average	2.09122
		image006	1	3.65	1.33		2.74436			image005	1	3.37	2.27		1.48458
			2	3.37	1.6		2.10625				2	3.42	1.95		1.75385
						average	2.42531							average	1.61921
						larvae 2 average	2.4895							larvae 2 average	1.85522
		image008	1	2.96	1.13		2.61947			image007	1	2.23	1.51		1.47682
			2	2.77	1.19		2.32773				2	2.44	1.56		1.5641
						average	2.4736							average	1.52046
		image009	1	2.5	0.98		2.55102			image008	1	2.5	1.34		1.86567
			2	2.23	0.7		3.18571				2	2.58	1.33		1.93985
						average	2.86837							average	1.90276
						larvae 3 average	2.67098							larvae 3 average	1.71161
		image011	1	2.8	1.29		2.17054			image010	1	4.1	1.84		2.22826
			2	3	1.44		2.08333				2	3.68	1.64		2.2439
						average	2.12694							average	2.23608
		image012	1	2.4	1.21		1.98347			image011	1	2.73	1.51		1.80795
			2	2.59	0.89		2.91011				2	2.71	1.68		1.6131
						average	2.44679							average	1.71052
						larvae 4 average	2.28686							larvae 4 average	1.9733
		image014	1	2.91	1.37		2.12409			image012	1	1.94	1.23		1.57724
			2	2.86	1.31		2.18321				2	1.97	1.18		1.66949
						average	2.15365							average	1.62336
		image015	1	2.37	1.07		2.21495			image013	1	2.35	1.7		1.38235
			2	2.28	1.14		2				2	2.73	1.71		1.59649
						average	2.10748							average	1.48942
						larvae 5 average	2.13056							larvae 5 average	1.55639
		image018	1	3.91	1.69		2.31361			image015	1	2.87	1.47		1.95238
			2	3.83	1.41		2.71631				2	2.81	1.44		1.95139
						average	2.51496							average	1.95188
		image019	1	2.76	1.01		2.73267			image016	1	1.73	1.01		1.71287
			2	2.75	0.81		3.39506				2	1.69	0.86		1.96512
						average	3.06387							average	1.83899
						larvae 6 average	2.78941							larvae 6 average	1.89544
		image022	1	4.81	1.72		2.79651			image018	1	1.59	0.97		1.63918
			2	4.46	1.8		2.47778				2	1.51	0.82		1.84146
						average	2.63714							average	1.74032
		image025	1	4.93	2.04		2.41667			image019	1	1.82	1.15		1.58261
			2	4.62	1.86		2.48387				2	1.77	1.33		1.33083
						average	2.45027							average	1.45672
						larvae 7 average	2.54371							larvae 7 average	1.59852
										image021	1	2.6	1.44		1.80556
						average	2.46944				2	2.56	1.76		1.45455
						standard deviation	0.317906							average	1.63005
										image022	1	1.68	0.84		2
			replicate #3 averages for Graphpad Superplots								2	1.7	1.09		1.55963
				control	h.s. zif-1									average	1.77982
				2.37508	1.76
				2.4895	1.85522									larvae 8 average	1.70493
				2.67098	1.71161
				2.28686	1.9733
				2.13056	1.55639									average	1.76097
				2.78941	1.89544									standard deviation	0.305743
				2.54371	1.59852
					1.70493
			avg	2.46944	1.75693

## Sheet: Figure 7J - source data
	Figure 7J - source data. Fluorescent intensity values for lumenal membrane and cytoplasmic measurements of GFP::PKC-3 in EXC-5::ZF1::mScarlet background (control vs heat shock ZIF-1)
		Replicate #1
		exc-5(xn108); pkc-3(it309); xnEx523[t28h11.8p::cfp, pRF4] control								exc-5(xn108); pkc-3(it309); xnEx519[hsp-16.41p::zif-1; t28h11.8p::CFP, pRF4] heat shock ZIF-1
		sample #	measurement #	lumen mean intensity	cytoplasm mean intensity		lumen/cytoplasm			sample #	measurement #	lumen mean intensity	cytoplasm mean intensity		lumen/cytoplasm
		image001	1	6.2	3.61		1.71745			L4 #1 ant	1	2.16	3.25		0.664615
			2	6.45	4.02		1.60448				2	3.77	3.05		1.23607
						average	1.66096							average	0.95034
		image002	1	13.56	6.93		1.95671			image009	1	4.56	3.63		1.2562
			2	13.12	6.96		1.88506				2	4.81	3.1		1.55161
						average	1.92088							average	1.40391
						larvae 1 average	1.79092							larvae 1 average	1.17712
		image003	1	5.76	3.62		1.59116			image010	1	2.06	2.76		0.746377
			2	6.92	3.14		2.20382				2	3.24	2.7		1.2
						average	1.89749							average	0.973188
		image004	1	7.23	3.8		1.90263			image011	1	3.12	4.09		0.762836
			2	8	3.66		2.18579				2	4.56	3.82		1.19372
						average	2.04421							average	0.978277
						larvae 2 average	1.97085							larvae 2 average	0.975733
		image005	1	4.66	4.71		0.989384			image012	1	4.48	2.9		1.54483
			2	5.38	4.16		1.29327				2	4.51	3.05		1.47869
						average	1.14133							average	1.51176
		image006	1	7.61	5.29		1.43856			image013	1	3.37	3.38		0.997041
			2	8.15	5.12		1.5918				2	4.37	3.29		1.32827
						average	1.51518							average	1.16265
						larvae 3 average	1.32825							larvae 3 average	1.33721
		image007	1	6.63	4.64		1.42888			image014	1	2.11	2.41		0.875519
			2	6.35	4.68		1.35684				2	2.69	2.42		1.11157
						average	1.39286							average	0.993544
		image008	1	10.82	7.31		1.48016			image015	1	4.11	3.39		1.21239
			2	10.99	6.04		1.81954				2	3.49	3.21		1.08723
						average	1.64985							average	1.14981
						larvae 4 average	1.52135							larvae 4 average	1.07168
		image009	1	9.87	5.14		1.92023			image016	1	4.96	3.79		1.30871
			2	9.87	5.14		1.69715				2	4.17	3.72		1.12097
						average	1.80869							average	1.21484
		image011	1	7.91	4.48		1.76562			image017	1	4.52	3.78		1.19577
			2	8.07	4.78		1.68828				2	4.76	3.62		1.31492
						average	1.72695							average	1.25534
						larvae 5 average	1.76782							larvae 5 average	1.23509
						average	1.67584							average	1.15937
						standard deviation	0.29894							standard deviation	0.250275
			replicate #1 averages for Graphpad Superplots
				control	h.s. zif-1
				1.79092	1.17712
				1.97085	0.975733
				1.32825	1.33721
				1.52135	1.07168
				1.76782	1.23509
			average
				1.68	1.16
		Replicate #2
		exc-5(xn108); pkc-3(it309); xnEx523[t28h11.8p::cfp, pRF4] control								exc-5(xn108); pkc-3(it309); xnEx520[hsp-16.41p::zif-1; t28h11.8p::CFP, pRF4] heat shock ZIF-1
		sample #	measurement #	lumen mean intensity	cytoplasm mean intensity		lumen/cytoplasm			sample #	measurement #	lumen mean intensity	cytoplasm mean intensity		lumen/cytoplasm
		image001	1	8.01	3.11		2.57556			image001	1	6.71	2.83		2.37102
			2	8.55	3.23		2.64706				2	6.51	2.83		2.30035
						average	2.61131							average	2.33569
		image002	1	10.31	5.37		1.91993			image002	1	9.08	7.7		1.17922
			2	10.13	4.65		2.17849				2	10.4	6.63		1.56863
						average	2.04921							average	1.37392
						larvae 1 average	2.33026							larvae 1 average	1.85481
		image003	1	7.03	3.69		1.90515			image004	1	7.82	4.14		1.88889
			2	6.83	3.24		2.10802				2	5.6	5.08		1.10236
						average	2.00659							average	1.49563
		image004	1	7.34	4.17		1.76019			image005	1	7.39	4.96		1.48992
			2	8.22	3.65		2.25205				2	5.89	5.49		1.07286
						average	2.00612							average	1.28139
						larvae 2 average	2.00636							larvae 2 average	1.38851
		image005	1	8.15	4.78		1.70502			image006	1	6.88	5.23		1.31549
			2	8.14	4.43		1.83747				2	5.97	4.51		1.32373
						average	1.77125							average	1.31961
		image006	1	5.53	5		1.106			image007	1	6.82	6.33		1.07741
			2	6.3	3.48		1.81034				2	8.32	6.42		1.29595
						average	1.45817							average	1.18668
						larvae 3 average	1.61471							larvae 3 average	1.25314
		image007	1	5.34	3.39		1.57522			image008	1	2.24	3.56		0.629213
			2	5.62	3.35		1.67761				2	3.43	3.47		0.988473
						average	1.62642							average	0.808843
		image008	1	7.8	4.13		1.88862			image009	1	4.04	4.63		0.87257
			2	7.82	4.5		1.73778				2	5.21	4.25		1.22588
						average	1.8132							average	1.04923
						larvae 4 average	1.71981							larvae 4 average	0.929035
		image009	1	6.16	4.03		1.52854			image010	1	6.57	5.98		1.09866
			2	6.03	3.91		1.5422				2	5.4	5.81		0.929432
						average	1.53537							average	1.01405
		image011	1	3.88	3.3		1.17576			image011	1	5.52	7.04		0.784091
			2	4.27	3.07		1.39088				2	7.92	5.59		1.41682
						average	1.28332							average	1.10045
						larvae 5 average	1.40934							larvae 5 average	1.05725
		image012	1	4.78	3.98		1.20101
			2	5.32	4.38		1.21461							average	1.29655
						average	1.20781							standard deviation	0.456015
						larvae 6 average	1.20781
						average	1.7608
						standard deviation	0.421041
			replicate #2 averages for Graphpad Superplots
				control	h.s. zif-1
				2.33	1.85
				2.00636	1.38851
				1.61471	1.25314
				1.71981	0.929035
				1.40934	1.05725
				1.20781
			average	1.76	1.3
		Replicate #3
		exc-5(xn108); pkc-3(it309); xnEx523[t28h11.8p::cfp, pRF4] control								exc-5(xn108); pkc-3(it309); xnEx519[hsp-16.41p::zif-1; t28h11.8p::CFP, pRF4] heat shock ZIF-1
		sample #	measurement #	lumen mean intensity	cytoplasm mean intensity		lumen/cytoplasm			sample #	measurement #	lumen mean intensity	cytoplasm mean intensity		lumen/cytoplasm
		image001	1	9.37	5.21		1.79846			post1	1	7.92	5.25		1.50857
			2	10.79	5.48		1.96898				2	8.22	4.8		1.7125
						average	1.88372							average	1.61054
		image002	1	9.86	4.42		2.23077			ant1	1	4.89	3.62		1.35083
			2	9.84	4.38		2.24658				2	5.57	3.8		1.46579
						average	2.23867							average	1.40831
						larvae 1 average	2.0612							larvae 1 average	1.50942
		ant2	1	9.55	5.92		1.61318			image003	1	6.09	4.1		1.48537
			2	9.84	5.47		1.7989				2	6.51	4.52		1.44027
						average	1.70604							average	1.46282
		post2	1	9.14	9.18		0.995643			image004	1	8.22	5.3		1.55094
			2	10.67	6.1		1.74918				2	7.57	5		1.514
						average	1.37241							average	1.53247
						larvae 2 average	1.53923							larvae 2 average	1.49764
		L4 ant	1	5.53	5.46		1.01282			image005	1	6.36	4.45		1.42921
			2	5.28	4.92		1.07317				2	6.13	3.74		1.63904
						average	1.043							average	1.53413
		image006	1	8.35	6.12		1.36438			image006	1	6.56	5.23		1.2543
			2	8.46	5.32		1.59023				2	6.26	4.47		1.40045
						average	1.4773							average	1.32737
						larvae 3 average	1.26015							larvae 3 average	1.43075
		image007	1	6.01	5.54		1.08484			image007	1	4.22	3.29		1.28267
			2	7.51	4.07		1.84521				2	3.99	3.28		1.21646
						average	1.46502							average	1.24957
		image008	1	11.3	5.45		2.07339			image008	1	3.53	3.24		1.08951
			2	10.98	5.81		1.88985				2	3.56	2.84		1.25352
						average	1.98162							average	1.17151
						larvae 4 average	1.72332							larvae 4 average	1.21054
		image009	1	3.82	2.93		1.30375			image009	1	3.71	2.8		1.325
			2	2.98	3.17		0.940063				2	3.37	2.54		1.32677
						average	1.12191							average	1.32589
		image010	1	5.96	3.91		1.5243			image010	1	3.43	2.9		1.18276
			2	5.97	3.53		1.69122				2	3.48	2.7		1.28889
						average	1.60776							average	1.23582
						larvae 5 average	1.36483							larvae 5 average	1.28085
		image011	1	6.27	3.06		2.04902			image011	1	3.94	3.31		1.19033
			2	6.21	2.89		2.14879				2	3.71	2.61		1.42146
						average	2.0989							average	1.30589
		image012	1	5.02	2.72		1.84559			image012	1	4.13	3.38		1.22189
			2	4.63	2.08		2.22596				2	4.16	3.12		1.33333
						average	2.03577							average	1.27761
						larvae 5 average	2.06734							larvae 5 average	1.29175
						average	1.66934							average	1.37016
						standard deviation	0.422576							standard deviation	0.152538
			replicate #3 averages for Graphpad Superplots
				control	h.s. zif-1
				2.0612	1.50942
				1.53923	1.49764
				1.26015	1.43075
				1.72332	1.21054
				1.36483	1.28085
				2.06734	1.29175
			average	1.67	1.37
