# Supplementary figures and images for: A polarity pathway for exocyst-dependent intracellular tube extension
Source: eLife journal article supplement (doi:10.7554/elife.65169), 2021-03-09

Figure 4 - figure supplement 2

L1 larval stage

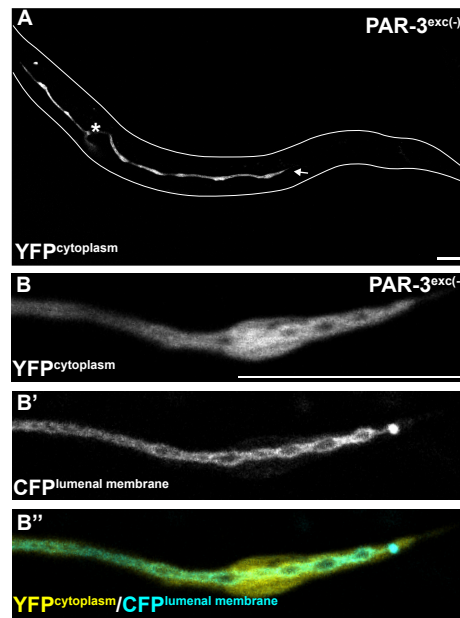

Supplement: supp [file elife-65169-supp-v1.zip]

Figure 5 - figure supplement 1

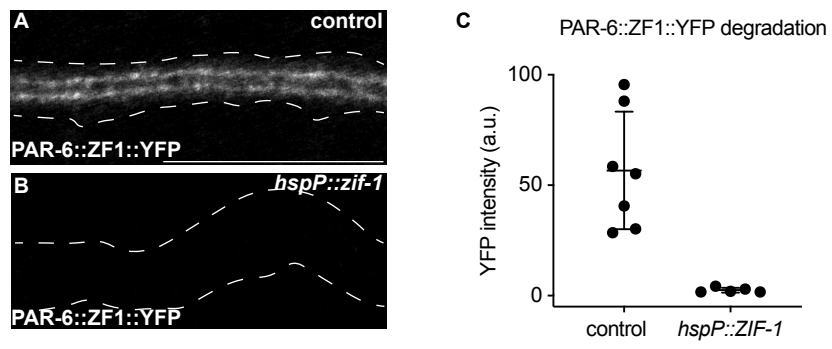

Supplement: supp [file elife-65169-supp-v1.zip]

Figure 1 - figure supplement 1

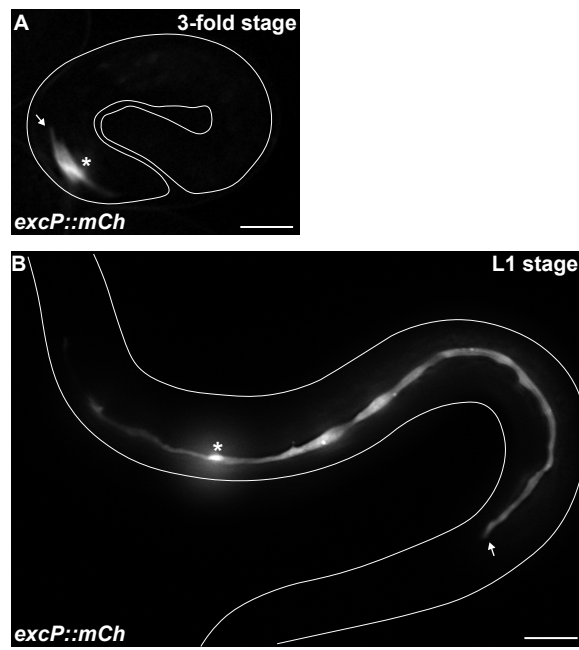

Supplement: supp [file elife-65169-supp-v1.zip]

Figure 2 - figure supplement 1

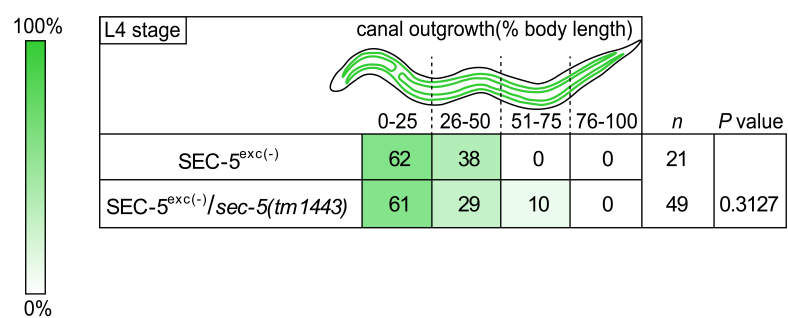

Supplement: supp [file elife-65169-supp-v1.zip › elife_poa_e65169_Figure_2_figure_supplement_1.pdf]

Figure 4 - figure supplement 1

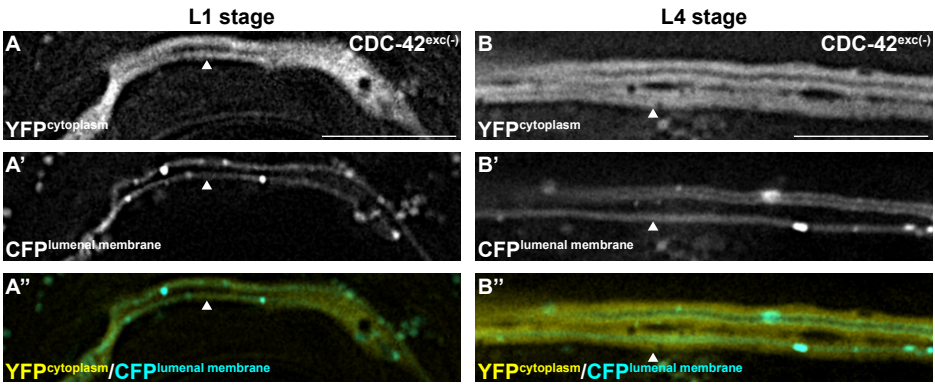

Supplement: supp [file elife-65169-supp-v1.zip › elife_poa_e65169_Figure_4_figure_supplement_1.pdf]
